# Supplementary material for: Characterization of SALL2 Gene Isoforms and Targets Across Cell Types Reveals Highly Conserved Networks
Source: PubMed Central journal article supplement (PMC7937961; doi:10.3389/fgene.2021.613808), 2021-02-22
Supplement: Image_2.pdf [file Image_2.pdf]

>WT  
NNNTATNNTANNTAGAGGCTGCCGCAGACCCAGCGGCCATCGCCTCCCTCAATCCCAATATCCATTGTCTCCCACCCACC  
TGGCCCTCCACTT**CCCCACAACC**ATGGCGCACGAATCCGAGAGGAGCTCTCGTCTCGGGGTGCCCTGCCGGGAGCCGGCA  
GAGCTCGGAGGTGCGGTAGGGTCGGTGGGCTGGGCAGGGGTGGGGCGGAGGGGGATGCGCAGGGGCGGCAGACTTTC  
GGTGGGTGGGAGAAAAATGCANGNNNNNNNGTNNNNNNNNN

= MAHESRSSRLGVPCGEP AELGGAVGSVGLRGGGGGGCAGAAKTFGGWEKM

>Clone\_17  
TAGNTAGAGGCTGCCGCATAGCCAGCGGCCATCGCCTCCCTCAATCCAATATCCATTTTCTCCCACCCCTCGTGTCCCTC  
CCCTT**CCCC**CCAAGGCGCNCGAATCCGAGAGGAGCTCTCGTCTCGGGGTGCCCTGCCGGGAGCCGGCAGAGCTCGGAGGT  
GCGGTAGGGTGGTGGGCTGGGCAGGGGTGGGGCGGAGGGGGAATGCGCAAGGGGCGGGCAGACTTTCGGTGGGTGG  
NNNNNNNANNGC NNNNNNNNCNNNNNNNNNNNNNNNN

= KAXESRSSRLGVPCGEP AELGGAVGSVGLRGGGGGGMRKGRAKTFGGW

|          |                                                                                                          |     |
|----------|----------------------------------------------------------------------------------------------------------|-----|
| WT       | NNNTATNNTANNTAGAGGCTGCCGCAGACCCAGCGGCCATCGCCTCCCTCAATCCCAATA                                             | 60  |
| Clone_17 | -----TAGNTAGAGGCTGCCGCATAGCCAGCGGCCATCGCCTCCCTCAATCCAATA<br>** ***** * *****                             | 52  |
| WT       | TCCATTGTCTCCCACCCACCTGGCCCTCCACTT <b>CCCCACAACC</b> ATGGCGCACGAATCC                                      | 120 |
| Clone_17 | TCCATTTTCTCCCACCCCTCGTGTCCCTCCCTT <b>CCCC</b> ----CCAAGGCGCNCGAATCC<br>***** ***** * ** ***** ***** ** * | 108 |
| WT       | GAGAGGAGCTCTCGTCTCGGGGTGCCCTGCCGGGAGCCGGCAGAGCTCGGAGGTGCGGTA                                             | 180 |
| Clone_17 | GAGAGGAGCTCTCGTCTCGGGGTGCCCTGCCGGGAGCCGGCAGAGCTCGGAGGTGCGGTA<br>*****                                    | 168 |
| WT       | GGGTCGGTGGGCTGGGCAGGGGTGGGGCGGAGGGGGATGCGCAGGG---GCGGCGAAG                                               | 237 |
| Clone_17 | GGGTCGGTGGGCTGGGCAGGGGTGGGGCGGAGGGGGAATGCGCAAGGGGCGGGCAGAG<br>***** * *****                              | 228 |
| WT       | ACTTTCGGTGGGTGGGAGAAAAATGCANGNNNNNNNGTNNNNNNNNNN-----                                                    | 285 |
| Clone_17 | ACTTTCGGTGGGTGGNNNNNNNANNGC NNNNNNNNCNNNNNNNNNNNNNNNNNN<br>***** *****                                   | 281 |
