# Supplementary material for: Characterization of SALL2 Gene Isoforms and Targets Across Cell Types Reveals Highly Conserved Networks
Source: Front Genet. 2021 Feb 22;12:613808. doi: 10.3389/fgene.2021.613808 (PMC7937961; doi:10.3389/fgene.2021.613808)
Supplement: Supplementary Table 2 — The raw TPM values for SALL2 mRNA in normal and cancer tissues, including statistical comparisons (p-values) from Student t-test. [file Table_2.xlsx]

## Sheet: raw_TPM_values_normal
Tissue	Sample_Name	Prefix	SALL2 (ENSG00000165821.11)
Adipose	GTEX-1117F-0226	-5GZZ7	4.728
Adipose	GTEX-1117F-1326	-5EGHH	2.569
Adipose	GTEX-111CU-1026	-5EGIL	0.58
Adipose	GTEX-111CU-1826	-5GZYN	2.541
Adipose	GTEX-111FC-0226	-5N9B8	6.883
Adipose	GTEX-111VG-2326	-5N9BK	1.83
Adipose	GTEX-111YS-1326	-5EGGK	0.4299
Adipose	GTEX-111YS-2426	-5GZZQ	1.809
Adipose	GTEX-1122O-0926	-9YFLC	0.6098
Adipose	GTEX-1122O-2026	-9YFMG	1.529
Adipose	GTEX-1128S-0926	-5GZZU	1.337
Adipose	GTEX-1128S-2126	-5H12U	1.306
Adipose	GTEX-113IC-0226	-5HL5C	8.957
Adipose	GTEX-113JC-0726	-5GZZR	4.633
Adipose	GTEX-117YW-0826	-5H11O	3.537
Adipose	GTEX-117YX-0726	-5GIET	3.458
Adipose	GTEX-117YX-2226	-5EGJJ	2.343
Adipose	GTEX-1192X-1526	-5H11I	4.962
Adipose	GTEX-11DXW-0326	-5H11W	5.854
Adipose	GTEX-11DXX-2026	-5EGJL	3.8
Adipose	GTEX-11DXX-2326	-9YFKS	1.336
Adipose	GTEX-11DXY-0326	-5H12F	11.04
Adipose	GTEX-11DXZ-1426	-5H12A	6.089
Adipose	GTEX-11DYG-2026	-5EGGX	9.731
Adipose	GTEX-11DZ1-0226	-5A5KF	3.041
Adipose	GTEX-11EI6-0226	-5EQ64	6.501
Adipose	GTEX-11EM3-1126	-5A5KM	1.65
Adipose	GTEX-11EM3-2326	-5H12B	1.188
Adipose	GTEX-11EMC-2826	-5PNY6	1.868
Adipose	GTEX-11EQ8-0226	-5EQ5G	3.568
Adipose	GTEX-11EQ9-1126	-5987I	0.6818
Adipose	GTEX-11EQ9-2526	-5HL66	3.605
Adipose	GTEX-11GS4-1026	-5N9DE	2.407
Adipose	GTEX-11GS4-2626	-5A5LD	4.332
Adipose	GTEX-11GSO-0226	-5A5LV	2.948
Adipose	GTEX-11GSO-2326	-5A5LX	2.937
Adipose	GTEX-11GSP-1026	-9WYSH	5.309
Adipose	GTEX-11H98-0226	-5NQ89	1.632
Adipose	GTEX-11I78-0226	-5HL6R	0.9514
Adipose	GTEX-11I78-2626	-5Q5AI	4.172
Adipose	GTEX-11LCK-0326	-5A5M7	1.243
Adipose	GTEX-11LCK-1126	-5A5KC	3.34
Adipose	GTEX-11NUK-0326	-5HL5K	4.51
Adipose	GTEX-11NUK-2026	-5PNVZ	6.262
Adipose	GTEX-11NV4-1426	-5BC4W	10.99
Adipose	GTEX-11O72-0226	-59869	1.317
Adipose	GTEX-11OF3-0826	-5BC51	5.649
Adipose	GTEX-11OF3-2426	-5Q5AS	5.518
Adipose	GTEX-11ONC-2526	-5986W	6.105
Adipose	GTEX-11P7K-0826	-5BC5F	2.1
Adipose	GTEX-11P7K-2026	-5GU74	3.653
Adipose	GTEX-11P81-0726	-5PNYH	4.028
Adipose	GTEX-11P81-2426	-5GU65	4.93
Adipose	GTEX-11P82-0326	-5HL51	0.5112
Adipose	GTEX-11P82-1726	-5Q5AT	2.624
Adipose	GTEX-11PRG-0626	-5BC56	4.654
Adipose	GTEX-11PRG-1526	-5HL6Z	6.851
Adipose	GTEX-11TT1-1926	-5PNYN	0.4024
Adipose	GTEX-11TT1-2426	-5EQMK	0.628
Adipose	GTEX-11TTK-0226	-5N9EC	3.811
Adipose	GTEX-11TUW-2626	-5EQKZ	2.257
Adipose	GTEX-11UD1-0226	-5EQKL	5.481
Adipose	GTEX-11UD2-0126	-5EQL2	3.903
Adipose	GTEX-11VI4-1226	-5EQMP	1.547
Adipose	GTEX-11WQC-2426	-5EQKQ	2.616
Adipose	GTEX-11WQK-1526	-5EGKN	3.113
Adipose	GTEX-11XUK-1726	-5GU61	1.278
Adipose	GTEX-11XUK-2126	-5EQLR	2.322
Adipose	GTEX-11ZTS-0226	-5EQKD	3.398
Adipose	GTEX-11ZTS-1326	-5EQMA	6.224
Adipose	GTEX-11ZTT-2526	-5EQM9	2.162
Adipose	GTEX-11ZU8-2426	-5EQMV	1.963
Adipose	GTEX-11ZUS-0726	-59886	7.241
Adipose	GTEX-11ZUS-1826	-5FQTR	6.341
Adipose	GTEX-11ZVC-2626	-5FQTA	2.395
Adipose	GTEX-1211K-1226	-5EQ4N	1.908
Adipose	GTEX-1211K-2226	-5FQU6	4.52
Adipose	GTEX-12126-0426	-5Q5AP	3.414
Adipose	GTEX-1212Z-0526	-5FQSQ	5.284
Adipose	GTEX-1212Z-2426	-5EQ5D	5.562
Adipose	GTEX-12584-0226	-5EQL5	1.196
Adipose	GTEX-12584-2126	-5FQUM	1.25
Adipose	GTEX-12696-1826	-5EGJS	1.86
Adipose	GTEX-12696-2526	-5EQLN	3.42
Adipose	GTEX-1269C-2726	-5EGJ4	4.366
Adipose	GTEX-12BJ1-0826	-5EQ5P	1.332
Adipose	GTEX-12C56-0826	-5EGJ5	1.175
Adipose	GTEX-12C56-1626	-5FQUO	1.85
Adipose	GTEX-12KS4-0426	-5EQMC	2.261
Adipose	GTEX-12KS4-1526	-5EQ6E	1.806
Adipose	GTEX-12WSA-0326	-5BC6I	4.425
Adipose	GTEX-12WSA-1626	-5EGJV	4.58
Adipose	GTEX-12WSC-0226	-5EQ52	4.058
Adipose	GTEX-12WSC-1726	-5GCN3	8.658
Adipose	GTEX-12WSD-0226	-59HKO	7.615
Adipose	GTEX-12WSF-1526	-6PAN6	8.763
Adipose	GTEX-12WSG-0426	-5FQSE	6.944
Adipose	GTEX-12WSI-1526	-5GCNM	3.478
Adipose	GTEX-12WSK-1026	-5CVNR	1.484
Adipose	GTEX-12WSL-1126	-5CVNK	3.835
Adipose	GTEX-12WSL-2426	-5GCN7	1.871
Adipose	GTEX-12WSM-0226	-5LZV6	3.157
Adipose	GTEX-12WSM-0626	-5GCOK	6.421
Adipose	GTEX-12ZZW-2326	-5DUW2	8.97
Adipose	GTEX-12ZZX-0226	-5DUXU	4.232
Adipose	GTEX-12ZZX-1726	-5BC63	3.414
Adipose	GTEX-12ZZY-0326	-5LZVQ	2.927
Adipose	GTEX-12ZZZ-0526	-5DUX6	3.781
Adipose	GTEX-13111-0626	-5LZVR	0.6351
Adipose	GTEX-13111-1726	-5EGJZ	5.684
Adipose	GTEX-13112-1126	-5GCMY	4.627
Adipose	GTEX-13112-2726	-5DUW5	4.337
Adipose	GTEX-13113-1126	-5LZU9	1.751
Adipose	GTEX-13113-1826	-5LZW4	1.591
Adipose	GTEX-1313W-0226	-5LZV7	2.413
Adipose	GTEX-1313W-1626	-5J1OE	2.407
Adipose	GTEX-1314G-1626	-5EQ67	6.986
Adipose	GTEX-131XE-2026	-5LZW1	3.998
Adipose	GTEX-131XE-2426	-5EQ5V	2.844
Adipose	GTEX-131XF-0726	-5GIE5	1.909
Adipose	GTEX-131XF-2226	-5EQKG	4.931
Adipose	GTEX-131XG-0126	-5K7UJ	2.066
Adipose	GTEX-131XH-0826	-5GCN8	3.421
Adipose	GTEX-131XW-0526	-5PNXZ	4.61
Adipose	GTEX-131YS-0226	-5IJEH	4.333
Adipose	GTEX-131YS-1726	-5HL7G	6.264
Adipose	GTEX-132AR-0226	-5IJBE	2.12
Adipose	GTEX-132AR-0526	-5J2MJ	5.583
Adipose	GTEX-132NY-1126	-5PNVE	8.611
Adipose	GTEX-132Q8-1726	-5EGK8	3.278
Adipose	GTEX-132QS-0826	-5K7WV	0.8839
Adipose	GTEX-132QS-2526	-62LFJ	2.167
Adipose	GTEX-1339X-0726	-5L3FF	3.45
Adipose	GTEX-133LE-0926	-5P9J1	1.699
Adipose	GTEX-133LE-1926	-5N9FV	1.254
Adipose	GTEX-1399R-2626	-5KLZ7	3.293
Adipose	GTEX-1399S-1426	-5PNYQ	1.378
Adipose	GTEX-1399T-1326	-5PNVH	6.28
Adipose	GTEX-1399T-2726	-5K7XK	4.222
Adipose	GTEX-1399U-2026	-9WPNN	0.6297
Adipose	GTEX-1399U-2426	-5K7XB	2.518
Adipose	GTEX-139D8-0326	-5IJCJ	10.61
Adipose	GTEX-139D8-1626	-5IJFZ	8.108
Adipose	GTEX-139T4-0126	-5HL5G	3.798
Adipose	GTEX-139T6-0526	-5IJC9	0.9409
Adipose	GTEX-139T6-2126	-5KM37	2.045
Adipose	GTEX-139T8-0226	-5L3EA	5.221
Adipose	GTEX-139TT-0226	-5K7YH	8.861
Adipose	GTEX-139TU-0226	-5J1NM	3.978
Adipose	GTEX-139TU-1426	-5LZY9	7.638
Adipose	GTEX-139YR-0326	-5J1MC	3.561
Adipose	GTEX-139YR-2426	-5J1OB	6.218
Adipose	GTEX-13CF2-2626	-5LZZA	5.234
Adipose	GTEX-13CF3-1126	-5LZXB	0.8536
Adipose	GTEX-13CF3-2326	-5IFGL	2.029
Adipose	GTEX-13D11-0526	-5LZYM	5.515
Adipose	GTEX-13D11-2326	-5IJCY	3.056
Adipose	GTEX-13FH7-1926	-5J2OL	1.001
Adipose	GTEX-13FH7-2226	-5IJD4	2.021
Adipose	GTEX-13FHO-0326	-5IJBH	2.565
Adipose	GTEX-13FHO-2026	-5J1OA	5.064
Adipose	GTEX-13FHP-0226	-5K7WD	3.359
Adipose	GTEX-13FTW-0426	-5K7X2	0.9739
Adipose	GTEX-13FTW-2526	-5IJC8	4.202
Adipose	GTEX-13FTX-0626	-5J2NS	1.795
Adipose	GTEX-13FTY-0626	-5L3F8	3.32
Adipose	GTEX-13FXS-1326	-62LFR	8.481
Adipose	GTEX-13G51-0526	-5IJCQ	7.839
Adipose	GTEX-13G51-2626	-5LZYW	4.411
Adipose	GTEX-13IVO-0226	-5LZXU	4.609
Adipose	GTEX-13IVO-2426	-5K7V9	3.921
Adipose	GTEX-13JUV-0626	-5J1MQ	2.045
Adipose	GTEX-13JUV-2826	-5LZWU	6.892
Adipose	GTEX-13JVG-0226	-5J1MW	1.251
Adipose	GTEX-13N11-1826	-5IJDS	6.817
Adipose	GTEX-13N11-2626	-5K7UQ	9.971
Adipose	GTEX-13N1W-0226	-5K7W6	3.233
Adipose	GTEX-13N1W-1226	-5K7UM	2.611
Adipose	GTEX-13N2G-1926	-5J1O3	3.17
Adipose	GTEX-13N2G-2726	-5J1MG	4.325
Adipose	GTEX-13NYB-2626	-9YFMI	9.392
Adipose	GTEX-13NYS-0226	-5MR49	2.257
Adipose	GTEX-13NYS-0726	-5J1OR	3.291
Adipose	GTEX-13NZ8-0926	-5MR3U	2.371
Adipose	GTEX-13NZ9-0526	-5J1OX	8.165
Adipose	GTEX-13NZ9-2026	-5KM1U	9.33
Adipose	GTEX-13NZA-0126	-5K7UH	1.952
Adipose	GTEX-13NZB-0826	-5K7X5	8.377
Adipose	GTEX-13NZB-2426	-5K7UF	3.895
Adipose	GTEX-13O1R-0226	-5K7U5	1.526
Adipose	GTEX-13O21-1526	-5K7W4	3.092
Adipose	GTEX-13O21-3126	-5J1OI	1.36
Adipose	GTEX-13O3P-0226	-5KM3Z	2.336
Adipose	GTEX-13O3P-0926	-5IFFI	11.67
Adipose	GTEX-13O3Q-1126	-5K7YK	5.671
Adipose	GTEX-13O3Q-2326	-5KM3G	4.588
Adipose	GTEX-13O61-1926	-5KM1R	0.5224
Adipose	GTEX-13O61-2426	-5J1NV	1.346
Adipose	GTEX-13OVG-1326	-5K7Y3	1.647
Adipose	GTEX-13OVH-1126	-5K7YP	3.775
Adipose	GTEX-13OVI-1326	-5IJBO	6.981
Adipose	GTEX-13OVJ-0326	-5L3GL	1.673
Adipose	GTEX-13OVJ-0926	-5K7U1	1.852
Adipose	GTEX-13OVK-0326	-7KUEJ	7.577
Adipose	GTEX-13OVK-2126	-6PAN1	3.347
Adipose	GTEX-13OVL-0326	-5IJCS	7.048
Adipose	GTEX-13OVL-0826	-5L3GV	3.081
Adipose	GTEX-13OW6-0526	-5L3HY	6.467
Adipose	GTEX-13OW6-2426	-5K7WO	5.716
Adipose	GTEX-13OW7-0226	-5MR3N	4.429
Adipose	GTEX-13OW7-1126	-5K7V6	7.11
Adipose	GTEX-13OW8-0326	-5L3FB	2.022
Adipose	GTEX-13OW8-1226	-5K7XD	4.924
Adipose	GTEX-13PDP-0226	-5K7W9	2.695
Adipose	GTEX-13PDP-1226	-5K7TW	2.923
Adipose	GTEX-13PL6-0926	-5KLYY	8.562
Adipose	GTEX-13PL7-1226	-5SIAR	0.9157
Adipose	GTEX-13PLJ-0126	-5L3HU	1.785
Adipose	GTEX-13PVQ-0226	-5SIBG	2.468
Adipose	GTEX-13PVQ-2226	-5L3G9	1.323
Adipose	GTEX-13PVR-0526	-5S2OB	0.9494
Adipose	GTEX-13PVR-2426	-5RQHN	3.011
Adipose	GTEX-13QBU-1326	-5LU4K	1.406
Adipose	GTEX-13QBU-2526	-5LU4X	1.057
Adipose	GTEX-13QJ3-0426	-5RQHP	9.39
Adipose	GTEX-13RTJ-2526	-5S2Q3	2.482
Adipose	GTEX-13RTK-0726	-5Q5EN	0.8924
Adipose	GTEX-13S7M-0226	-5S2UG	3.767
Adipose	GTEX-13S7M-0826	-5QGQX	10.04
Adipose	GTEX-13S86-0926	-5SI6I	6.295
Adipose	GTEX-13SLW-0226	-5S2NA	2.934
Adipose	GTEX-13SLX-0426	-5QGRC	3.51
Adipose	GTEX-13U4I-0226	-5SIB1	7.64
Adipose	GTEX-13U4I-1726	-5J1MF	7.897
Adipose	GTEX-13VXT-0226	-5LU9Q	1.082
Adipose	GTEX-13VXT-0926	-5LU5K	2.715
Adipose	GTEX-13VXU-0226	-5SI9R	4.094
Adipose	GTEX-13VXU-1026	-5KLZE	3.936
Adipose	GTEX-13W3W-1126	-5L3DO	2.567
Adipose	GTEX-13W3W-2526	-5SI9P	2.765
Adipose	GTEX-13W46-1226	-5SIAS	11.09
Adipose	GTEX-13X6H-1726	-5Q5EH	3.642
Adipose	GTEX-13X6I-1526	-5SIAC	8.033
Adipose	GTEX-13X6J-0226	-7EPGC	3.302
Adipose	GTEX-13X6J-1926	-5TDCU	7.781
Adipose	GTEX-13X6K-0226	-5QGPB	3.865
Adipose	GTEX-13X6K-0726	-5LU2Z	3.32
Adipose	GTEX-13YAN-0426	-5O9DR	1.677
Adipose	GTEX-13YAN-1126	-5TDC7	4.647
Adipose	GTEX-1445S-2426	-79ON2	0.9356
Adipose	GTEX-144FL-0226	-5Q5D4	2.1
Adipose	GTEX-144GL-0226	-5QGOX	8.256
Adipose	GTEX-144GM-0626	-79OKY	6.399
Adipose	GTEX-144GM-1926	-5LUAN	1.193
Adipose	GTEX-144GN-0726	-5O98O	5.78
Adipose	GTEX-144GO-1626	-7EPG5	3.966
Adipose	GTEX-145LS-0226	-5O9A5	4.374
Adipose	GTEX-145LT-1526	-5O98P	1.386
Adipose	GTEX-145LT-1826	-5QGP4	2.884
Adipose	GTEX-145LU-1226	-5LU9B	5.492
Adipose	GTEX-145LV-1026	-5O9AE	2.093
Adipose	GTEX-145ME-0726	-5O9A3	11.33
Adipose	GTEX-145ME-1926	-5MR6T	2.562
Adipose	GTEX-145MF-0526	-5LUA6	7.272
Adipose	GTEX-145MF-1026	-5Q5EQ	2.943
Adipose	GTEX-145MG-0126	-5TDDA	6.447
Adipose	GTEX-145MI-0426	-5O99V	4.774
Adipose	GTEX-145MI-0826	-5SI95	5.487
Adipose	GTEX-145MN-2626	-5NQAH	2.746
Adipose	GTEX-145MO-0426	-5QGP6	2.583
Adipose	GTEX-146FH-0226	-5QGPQ	2.763
Adipose	GTEX-146FH-2026	-5SI9I	3.852
Adipose	GTEX-146FQ-0226	-5NQAL	2.965
Adipose	GTEX-146FR-0226	-5Q5F6	1.953
Adipose	GTEX-146FR-1826	-5QGPF	3.156
Adipose	GTEX-14753-0326	-5QGQB	3.731
Adipose	GTEX-14753-2526	-5LU97	4.189
Adipose	GTEX-147F3-0626	-5NQ9I	1.37
Adipose	GTEX-147GR-0426	-5S2OL	3.52
Adipose	GTEX-147JS-0426	-5TDD2	4.41
Adipose	GTEX-147JS-1026	-5S2MP	6.021
Adipose	GTEX-148VI-1726	-5S2W9	7.106
Adipose	GTEX-1497J-2326	-5NQBK	3.099
Adipose	GTEX-14A5H-0526	-5TDCN	3.259
Adipose	GTEX-14ABY-0326	-5TDDK	11.45
Adipose	GTEX-14ABY-1926	-62LDJ	4.736
Adipose	GTEX-14AS3-0426	-5QGQK	4.501
Adipose	GTEX-14AS3-2026	-5TDD9	4.502
Adipose	GTEX-14B4R-0526	-5QGQT	2.013
Adipose	GTEX-14BIL-0226	-5SI9E	3.215
Adipose	GTEX-14BIL-2426	-5QGQR	2.948
Adipose	GTEX-14BIM-1626	-7EWD2	2.972
Adipose	GTEX-14BIN-0726	-793DQ	2.319
Adipose	GTEX-14BIN-1226	-5S2OM	7.884
Adipose	GTEX-14BMU-0626	-73KZ6	1.201
Adipose	GTEX-14BMU-2126	-5S2TS	2.605
Adipose	GTEX-14BMV-0226	-5S2N2	2.438
Adipose	GTEX-14BMV-1626	-73KVQ	8.288
Adipose	GTEX-14C38-1026	-73KY7	2.519
Adipose	GTEX-14C39-0826	-5TDDU	1.282
Adipose	GTEX-14C39-2526	-5S2UH	1.233
Adipose	GTEX-14C5O-0226	-5SI6O	11.59
Adipose	GTEX-14C5O-0926	-793DM	6.493
Adipose	GTEX-14DAQ-0226	-664MQ	3.374
Adipose	GTEX-14DAQ-2526	-5RQIO	10.35
Adipose	GTEX-14DAR-0426	-664MW	3.869
Adipose	GTEX-14DAR-1926	-5S2NQ	2.962
Adipose	GTEX-14E1K-0426	-5S2PF	3.953
Adipose	GTEX-14E1K-2126	-793DU	3.726
Adipose	GTEX-14E6C-0226	-5S2N3	1.712
Adipose	GTEX-14E6C-1226	-5ZZUN	2.707
Adipose	GTEX-14E6D-0226	-62LDW	3.146
Adipose	GTEX-14E6D-1326	-62LES	7.04
Adipose	GTEX-14E6E-0226	-7DUEF	2.959
Adipose	GTEX-14E6E-1926	-664N4	2.256
Adipose	GTEX-14E7W-2326	-69LQC	9.627
Adipose	GTEX-14H4A-1026	-62LDY	2.827
Adipose	GTEX-14ICK-0326	-6LLIZ	1.13
Adipose	GTEX-14ICK-1726	-6AJA5	1.642
Adipose	GTEX-14ICL-0926	-5S2TU	0.6652
Adipose	GTEX-14ICL-2026	-62LDN	1.83
Adipose	GTEX-14JG1-0526	-6LLHW	3.506
Adipose	GTEX-14JG6-0526	-6LLIH	0.8793
Adipose	GTEX-14JG6-2326	-6LLH3	2.55
Adipose	GTEX-14JIY-0526	-62LFH	4.093
Adipose	GTEX-14JIY-1426	-6EU29	3.727
Adipose	GTEX-14LLW-0226	-62LEL	1.776
Adipose	GTEX-14PHW-1626	-6EU2H	2.932
Adipose	GTEX-14PHX-1626	-69LQB	1.448
Adipose	GTEX-14PHX-2426	-62LEN	1.762
Adipose	GTEX-14PHY-1026	-62LEV	7.284
Adipose	GTEX-14PII-0326	-6LLIQ	5.794
Adipose	GTEX-14PJ2-0226	-6LLH4	5.873
Adipose	GTEX-14PJ2-1426	-62LFF	3.156
Adipose	GTEX-14PJ3-0726	-69LQE	7.981
Adipose	GTEX-14PJ3-1926	-62LEY	2.866
Adipose	GTEX-14PJ4-0126	-62LEZ	1.209
Adipose	GTEX-14PJ4-2226	-6LLIS	5.746
Adipose	GTEX-14PJ5-0426	-5ZZW2	2.716
Adipose	GTEX-14PJ6-2226	-6LLIV	1.606
Adipose	GTEX-14PJM-0326	-62LF2	2.308
Adipose	GTEX-14PJM-1226	-686Z7	9.509
Adipose	GTEX-14PJN-0626	-6EU13	0.7016
Adipose	GTEX-14PJO-1626	-69LPQ	2.775
Adipose	GTEX-14PK6-0926	-62LF4	0.9222
Adipose	GTEX-14PK6-2026	-6LLHP	3.829
Adipose	GTEX-14PKU-0226	-6EU16	1.817
Adipose	GTEX-14PN3-0326	-6EU1X	1.178
Adipose	GTEX-14PN3-2526	-6EU15	1.718
Adipose	GTEX-14PN4-1426	-6LLJ4	1.877
Adipose	GTEX-15CHC-0826	-686YW	1.115
Adipose	GTEX-15CHQ-0226	-6EU2S	5.835
Adipose	GTEX-15CHQ-1126	-686YY	5.195
Adipose	GTEX-15D1Q-1326	-69LOA	3.92
Adipose	GTEX-15DCD-0226	-6LPKC	2.801
Adipose	GTEX-15DDE-0226	-6LLJ6	4.242
Adipose	GTEX-15DYW-1526	-7KUEP	6.104
Adipose	GTEX-15DZA-0626	-6PANC	1.148
Adipose	GTEX-15EOM-2326	-7KUMV	4.742
Adipose	GTEX-15ER7-0426	-6PAM3	2.865
Adipose	GTEX-15ER7-1026	-7KUMD	12.43
Adipose	GTEX-15ETS-0426	-6PANI	1.151
Adipose	GTEX-15EU6-1726	-6M48H	0.9409
Adipose	GTEX-15G19-0226	-6PAL2	2.402
Adipose	GTEX-15G19-1126	-7KUEL	2.985
Adipose	GTEX-15RIE-0126	-7KUF8	9.598
Adipose	GTEX-15RIE-2326	-7KFSC	4.298
Adipose	GTEX-15SDE-2426	-7KFRC	3.666
Adipose	GTEX-15SHU-2326	-7KUMC	2.984
Adipose	GTEX-15SKB-1626	-6PAL6	5.401
Adipose	GTEX-15UKP-0526	-7KFRO	0.9986
Adipose	GTEX-15UKP-1426	-7KUDX	1.656
Adipose	GTEX-169BO-0426	-7EPI1	4.878
Adipose	GTEX-169BO-1426	-9MQJT	3.373
Adipose	GTEX-16AAH-1526	-7LT9W	1.555
Adipose	GTEX-16AAH-2026	-7LG5F	4.331
Adipose	GTEX-16BQI-0526	-6PAM8	2.956
Adipose	GTEX-16BQI-1126	-7KULF	0.7425
Adipose	GTEX-16GPK-0226	-7DUFI	2.596
Adipose	GTEX-16GPK-1326	-7KUE4	8.547
Adipose	GTEX-16MT8-0526	-6PAM6	4.188
Adipose	GTEX-16MTA-1326	-6PALX	1.422
Adipose	GTEX-16MTA-2126	-6PALC	3.05
Adipose	GTEX-16NGA-0526	-731AJ	4.09
Adipose	GTEX-16NGA-1826	-7LG5L	2.318
Adipose	GTEX-16NPV-0626	-7IGOR	4.924
Adipose	GTEX-16NPX-0326	-7EWDI	5.843
Adipose	GTEX-16NPX-1026	-6PAM7	3.558
Adipose	GTEX-16XZY-2526	-7DHL2	1.362
Adipose	GTEX-16XZZ-0226	-7MGVJ	1.31
Adipose	GTEX-16XZZ-1626	-7KUEC	3.134
Adipose	GTEX-16YQH-0226	-6PALD	3.378
Adipose	GTEX-178AV-0626	-6PAM1	4.29
Adipose	GTEX-17EUY-0526	-7EWDE	6.849
Adipose	GTEX-17EVP-0426	-79OKG	3.62
Adipose	GTEX-17EVP-1426	-79OMN	5.368
Adipose	GTEX-17EVQ-0626	-7KFTB	4.395
Adipose	GTEX-17F96-0726	-793CB	16.38
Adipose	GTEX-17F96-1726	-7IGMB	3.172
Adipose	GTEX-17F97-0426	-7LT9U	6.127
Adipose	GTEX-17F97-1226	-79OJT	10.25
Adipose	GTEX-17F98-0326	-7DHLH	0.8153
Adipose	GTEX-17F98-1126	-79OJS	2.064
Adipose	GTEX-17F9E-1326	-7DHL4	4.613
Adipose	GTEX-17F9Y-0326	-7IGLS	6.661
Adipose	GTEX-17F9Y-0726	-7LT9G	5.258
Adipose	GTEX-17GQL-0826	-731AM	1.474
Adipose	GTEX-17HG3-2326	-79OKH	2.674
Adipose	GTEX-17HGU-0326	-7DUER	3.575
Adipose	GTEX-17HGU-1726	-79OKM	2.633
Adipose	GTEX-17HHE-1526	-793AS	5.262
Adipose	GTEX-17HHE-1926	-7EPGW	5.156
Adipose	GTEX-17HHY-0226	-793BQ	6.026
Adipose	GTEX-17HHY-1026	-7LG5E	8.193
Adipose	GTEX-17HII-0326	-7LG4X	2.304
Adipose	GTEX-17HII-0826	-7DUFH	11.5
Adipose	GTEX-17JCI-1626	-7EPGZ	13.11
Adipose	GTEX-17KNJ-0426	-718AK	3.233
Adipose	GTEX-17KNJ-2226	-DKPOU	4.285
Adipose	GTEX-17MF6-0226	-7LG4G	5.563
Adipose	GTEX-17MF6-1326	-79ONE	4.755
Adipose	GTEX-17MFQ-1126	-7LT9O	1.65
Adipose	GTEX-17MFQ-1826	-7DHLS	4.701
Adipose	GTEX-183FY-0326	-793BY	3.427
Adipose	GTEX-183FY-1226	-7DHLK	3.311
Adipose	GTEX-183WM-0226	-7LT8T	2.589
Adipose	GTEX-18465-0226	-7LG5M	5.207
Adipose	GTEX-18465-1826	-731BB	9.677
Adipose	GTEX-18A66-0326	-718BE	1.56
Adipose	GTEX-18A66-1926	-7LTAG	2.625
Adipose	GTEX-18A67-0226	-7LG67	3.546
Adipose	GTEX-18A67-1326	-7LT8V	3.077
Adipose	GTEX-18A6Q-0226	-718AS	3.637
Adipose	GTEX-18A6Q-1026	-7LT9S	7.627
Adipose	GTEX-18A7A-0326	-731AT	2.349
Adipose	GTEX-18A7A-0926	-7LT8H	7.658
Adipose	GTEX-18A7B-1226	-718AU	2.182
Adipose	GTEX-18D9A-0726	-7LTA7	2.484
Adipose	GTEX-18D9A-2026	-718BL	3.344
Adipose	GTEX-18D9B-1726	-7LTAP	0.9009
Adipose	GTEX-18D9U-0426	-731AN	1.125
Adipose	GTEX-18D9U-0726	-7LG5J	3.234
Adipose	GTEX-18QFQ-0226	-731BQ	3.032
Adipose	GTEX-18QFQ-1326	-731CF	2.306
Adipose	GTEX-1A32A-0226	-718B2	4.326
Adipose	GTEX-1A32A-0926	-718AB	4.872
Adipose	GTEX-1A3MV-0626	-731CH	1.174
Adipose	GTEX-1A3MV-2126	-718BV	2.42
Adipose	GTEX-1A3MW-0226	-7939O	4.024
Adipose	GTEX-1A3MX-0226	-731C4	4.314
Adipose	GTEX-1A3MX-0826	-72D64	7.295
Adipose	GTEX-1A8FM-0126	-7SB7P	5.563
Adipose	GTEX-1A8FM-2126	-7PC27	3.676
Adipose	GTEX-1A8G6-0526	-7PC1E	3.849
Adipose	GTEX-1A8G6-2026	-73KYC	5.559
Adipose	GTEX-1A8G7-0226	-731AS	4.043
Adipose	GTEX-1A8G7-1226	-73KYP	2.772
Adipose	GTEX-1AMEY-0526	-72D62	0.8317
Adipose	GTEX-1AMEY-1426	-7939I	1.675
Adipose	GTEX-1AMFI-1026	-73KYM	1.053
Adipose	GTEX-1AMFI-2126	-731BT	5.366
Adipose	GTEX-1AX8Z-1626	-73KWD	2.187
Adipose	GTEX-1AX9I-0226	-7SB75	4.997
Adipose	GTEX-1AX9I-1726	-731BX	5.821
Adipose	GTEX-1AX9J-0326	-73KXY	3.603
Adipose	GTEX-1AX9J-2226	-731CW	3.051
Adipose	GTEX-1AX9K-0926	-7939G	2.716
Adipose	GTEX-1AX9K-2426	-73KZ4	3.048
Adipose	GTEX-1AYCT-1126	-79OO8	1.469
Adipose	GTEX-1AYCT-2226	-7SB98	6.003
Adipose	GTEX-1AYD5-0126	-7DUG5	5.411
Adipose	GTEX-1AYD5-2326	-73KXF	7.805
Adipose	GTEX-1B8KE-0826	-72D6S	3.32
Adipose	GTEX-1B8KE-2526	-73KYQ	5.4
Adipose	GTEX-1B8KZ-1026	-73KYN	4.439
Adipose	GTEX-1B8KZ-1926	-7DUG8	5.946
Adipose	GTEX-1B8L1-0126	-9KNVS	12.74
Adipose	GTEX-1B8L1-2626	-7SB77	8.898
Adipose	GTEX-1B8SF-0526	-7939F	5.725
Adipose	GTEX-1B8SF-1726	-73KZ5	7.106
Adipose	GTEX-1B8SG-0226	-7939Q	2.577
Adipose	GTEX-1B8SG-1426	-7EWEM	5.163
Adipose	GTEX-1B932-0226	-7PBYH	3.691
Adipose	GTEX-1B932-1726	-793A5	8.532
Adipose	GTEX-1B933-0526	-7EPHM	8.66
Adipose	GTEX-1B933-1326	-7939U	2.426
Adipose	GTEX-1B97I-0526	-73KXE	1.456
Adipose	GTEX-1B97I-1726	-7939V	3.138
Adipose	GTEX-1B97J-1126	-7SB79	1.385
Adipose	GTEX-1B996-0126	-7PBYF	4.141
Adipose	GTEX-1B996-1226	-73KWZ	2.793
Adipose	GTEX-1BAJH-0426	-73KWY	6.751
Adipose	GTEX-1BAJH-2126	-7EWFB	5.474
Adipose	GTEX-1C2JI-0826	-7EPHB	1.973
Adipose	GTEX-1C2JI-2226	-7IGPJ	2.514
Adipose	GTEX-1C475-0326	-7SB8O	0.5697
Adipose	GTEX-1C475-1926	-7DUFV	4.71
Adipose	GTEX-1C4CL-0426	-7939N	7.147
Adipose	GTEX-1C64N-1326	-7SB7D	1.809
Adipose	GTEX-1C64O-0226	-73KXB	2.906
Adipose	GTEX-1C6VQ-0226	-7P8S5	2.168
Adipose	GTEX-1C6VQ-1526	-73KU9	8.682
Adipose	GTEX-1C6VR-1126	-7EPHD	5.338
Adipose	GTEX-1C6VR-2626	-7MGX2	3.895
Adipose	GTEX-1C6VS-0426	-79OJV	4.004
Adipose	GTEX-1C6VS-1826	-73KXN	3.504
Adipose	GTEX-1C6WA-0226	-7IGPO	8.271
Adipose	GTEX-1CAMQ-0126	-7SB7S	2.476
Adipose	GTEX-1CAMQ-1226	-7SB7E	3.163
Adipose	GTEX-1CAMR-0326	-793AH	3.925
Adipose	GTEX-1CAMR-1826	-7MXUJ	0.9669
Adipose	GTEX-1CAMS-0326	-7PC35	1.339
Adipose	GTEX-1CAMS-0926	-7SB7F	2.228
Adipose	GTEX-1CAV2-0226	-7IGPQ	3.659
Adipose	GTEX-1CB4E-0826	-793CS	4.671
Adipose	GTEX-1CB4E-1826	-7RHG8	5.612
Adipose	GTEX-1CB4F-0526	-9KNW2	9.866
Adipose	GTEX-1CB4F-1126	-79OLG	6.049
Adipose	GTEX-1CB4G-0326	-7SB8R	5.643
Adipose	GTEX-1CB4G-2126	-7IGQ8	4.805
Adipose	GTEX-1CB4H-0326	-9WG5G	1.899
Adipose	GTEX-1CB4I-0426	-7IGPR	4.729
Adipose	GTEX-1CB4I-0826	-7MGX1	0.5853
Adipose	GTEX-1CB4J-1126	-7PBY1	2.03
Adipose	GTEX-1E1VI-0226	-793CZ	5.317
Adipose	GTEX-1E1VI-1826	-9WG5J	3.447
Adipose	GTEX-1E2YA-0226	-9MQLY	1.746
Adipose	GTEX-1EH9U-0226	-7PBY8	4.086
Adipose	GTEX-1EH9U-1326	-79OM3	5.69
Adipose	GTEX-1EKGG-0126	-9YFLS	3.201
Adipose	GTEX-1EKGG-1426	-7PBY2	3.852
Adipose	GTEX-1EMGI-0226	-9MQL1	6.404
Adipose	GTEX-1EMGI-0726	-7PBZ4	7.476
Adipose	GTEX-1EN7A-1626	-79OLV	7.464
Adipose	GTEX-1EU9M-0326	-7RHGF	4.495
Adipose	GTEX-1EU9M-1126	-793DE	4.164
Adipose	GTEX-1EWIQ-0226	-793D3	4.961
Adipose	GTEX-1EWIQ-2526	-7EPIJ	9.78
Adipose	GTEX-1EX96-1426	-7PBZ5	1.319
Adipose	GTEX-1F48J-0226	-7SB82	3.77
Adipose	GTEX-1F48J-1826	-7SB8T	3.222
Adipose	GTEX-1F52S-0226	-7SB7U	4.256
Adipose	GTEX-1F52S-1326	-7SB6Q	7.065
Adipose	GTEX-1F5PK-2526	-9MQKN	2.092
Adipose	GTEX-1F5PL-1326	-7SB83	0.8759
Adipose	GTEX-1F6I4-0226	-9MQMA	4.498
Adipose	GTEX-1F6I4-2126	-7PC2J	3.326
Adipose	GTEX-1F6IF-2026	-7P8SE	5.398
Adipose	GTEX-1F6RS-0226	-9MQKO	2.12
Adipose	GTEX-1F75A-0226	-7PC2K	7.371
Adipose	GTEX-1F75B-1226	-7MXTW	4.502
Adipose	GTEX-1F75I-0426	-7PC3S	4.803
Adipose	GTEX-1F75I-1026	-7SB8B	0.7933
Adipose	GTEX-1F75W-0226	-9JGGP	2.432
Adipose	GTEX-1F88E-0526	-7SB8J	4.491
Adipose	GTEX-1F88F-2626	-9WG5K	3.441
Adipose	GTEX-1FIGZ-1626	-7SB8L	1.735
Adipose	GTEX-1GF9U-1226	-ARL9I	3.81
Adipose	GTEX-1GF9V-0226	-9MQKA	2.769
Adipose	GTEX-1GF9V-1126	-9MQM7	2.799
Adipose	GTEX-1GF9W-1026	-7SB8X	1.783
Adipose	GTEX-1GF9X-0926	-7PC2X	8.171
Adipose	GTEX-1GF9X-1926	-ADEIC	3.372
Adipose	GTEX-1GL5R-0726	-9MQL5	5.368
Adipose	GTEX-1GMR2-0226	-9JGHO	3.315
Adipose	GTEX-1GMR2-2526	-9MQKW	2.303
Adipose	GTEX-1GMR3-0826	-9WYT4	7.511
Adipose	GTEX-1GMR3-2026	-9MQLG	4.098
Adipose	GTEX-1GMR8-0226	-9YFL3	4.837
Adipose	GTEX-1GMRU-0226	-9YFLW	3.104
Adipose	GTEX-1GMRU-0726	-7PBZH	8.8
Adipose	GTEX-1GN1U-0226	-9YFLQ	2.965
Adipose	GTEX-1GN1U-0726	-9MQKL	10.14
Adipose	GTEX-1GN1V-0226	-9WYTN	3.025
Adipose	GTEX-1GN1W-0626	-9MQK3	2.344
Adipose	GTEX-1GN1W-1226	-9MQLW	1.743
Adipose	GTEX-1GN2E-0326	-COH3C	2.946
Adipose	GTEX-1GN73-0326	-9KNTW	6.816
Adipose	GTEX-1GN73-0626	-7PC3I	8.394
Adipose	GTEX-1GPI7-0226	-9MQKB	2.28
Adipose	GTEX-1GPI7-0826	-9JGG7	0.891
Adipose	GTEX-1GTWX-0226	-9YFLL	2.781
Adipose	GTEX-1GTWX-1526	-9MQLF	2.497
Adipose	GTEX-1GZ2Q-0326	-9WG6N	4.217
Adipose	GTEX-1GZ2Q-1226	-9MQM8	4.042
Adipose	GTEX-1GZ4H-0926	-9WG6Y	2.332
Adipose	GTEX-1GZ4H-1826	-9MQLE	7.069
Adipose	GTEX-1GZ4I-0226	-7RHHO	1.592
Adipose	GTEX-1GZ4I-2326	-9YFMO	3.907
Adipose	GTEX-1H11D-1126	-9YFM5	2.169
Adipose	GTEX-1H1CY-0826	-9WYTU	7.536
Adipose	GTEX-1H1CY-2626	-9MQKJ	5.268
Adipose	GTEX-1H1DE-0826	-ARU8V	3.603
Adipose	GTEX-1H1DE-2026	-9WG6Q	2.399
Adipose	GTEX-1H1DF-0226	-ARL9A	3.726
Adipose	GTEX-1H1DF-1426	-9YFMC	2.161
Adipose	GTEX-1H1DG-2026	-9QEIV	9.748
Adipose	GTEX-1H1E6-1126	-9JGGV	1.363
Adipose	GTEX-1H1E6-2026	-9KNVK	3.46
Adipose	GTEX-1H1ZS-0526	-9WG5L	2.78
Adipose	GTEX-1H1ZS-1326	-9WG74	5.912
Adipose	GTEX-1H23P-0226	-9YFLO	1.437
Adipose	GTEX-1H23P-1726	-A9SMN	2.891
Adipose	GTEX-1H2FU-0226	-9YFKO	2.939
Adipose	GTEX-1H2FU-1426	-9WPO6	4.799
Adipose	GTEX-1H3O1-0526	-9MQLS	4.651
Adipose	GTEX-1H3VE-0226	-9WYST	3.158
Adipose	GTEX-1H3VE-1926	-9YFL4	2.34
Adipose	GTEX-1H3VY-0226	-9YFMF	3.455
Adipose	GTEX-1H4P4-0226	-9YFKT	4.194
Adipose	GTEX-1H4P4-0326	-9WYTD	4.608
Adipose	GTEX-1HB9E-0426	-CNPPV	2.056
Adipose	GTEX-1HB9E-0526	-ARZNM	5.719
Adipose	GTEX-1HBPH-0526	-9YFMN	4.589
Adipose	GTEX-1HBPH-2226	-9WYSO	9.56
Adipose	GTEX-1HBPI-1426	-B2LW7	3.239
Adipose	GTEX-1HBPI-1826	-ADEHE	2.136
Adipose	GTEX-1HBPM-0326	-CMKGR	2.296
Adipose	GTEX-1HBPN-1526	-9WYSB	4.593
Adipose	GTEX-1HC8U-0926	-A9G3L	1.336
Adipose	GTEX-1HCU6-0226	-CGQES	1.777
Adipose	GTEX-1HCU6-1626	-CMKGW	2.053
Adipose	GTEX-1HCU7-0326	-CMKGI	4.239
Adipose	GTEX-1HCU7-2026	-A9G2B	4.434
Adipose	GTEX-1HCU8-0726	-ADEIR	0.6654
Adipose	GTEX-1HCU8-1126	-CM2SA	1.346
Adipose	GTEX-1HCU9-0626	-ACKW6	0.9088
Adipose	GTEX-1HCUA-0926	-ADEIX	3.117
Adipose	GTEX-1HCUA-2226	-ADEHF	3.422
Adipose	GTEX-1HCVE-0226	-CGQEV	2.75
Adipose	GTEX-1HFI6-0326	-ADEI5	7.015
Adipose	GTEX-1HFI6-1726	-CGQFH	9.782
Adipose	GTEX-1HFI7-0726	-ACKVN	0.6625
Adipose	GTEX-1HFI7-2026	-CGQFR	2.442
Adipose	GTEX-1HGF4-0226	-CNNQL	5.523
Adipose	GTEX-1HGF4-2526	-ADEIZ	2.996
Adipose	GTEX-1HKZK-1726	-ADEJ9	1.407
Adipose	GTEX-1HR98-0226	-CGQEK	2.483
Adipose	GTEX-1HR9M-0226	-COH3E	4.129
Adipose	GTEX-1HR9M-1426	-A9SMB	5.413
Adipose	GTEX-1HSEH-0226	-ACKVV	5.041
Adipose	GTEX-1HSEH-1326	-ADEI1	0.8459
Adipose	GTEX-1HSGN-0126	-CGQFU	1.719
Adipose	GTEX-1HSGN-1926	-CMKGS	2.726
Adipose	GTEX-1HSKV-0326	-ADEJC	4.851
Adipose	GTEX-1HSKV-1926	-CNPPN	9.01
Adipose	GTEX-1HSMO-0226	-CGQEZ	2.039
Adipose	GTEX-1HSMO-1426	-CNNQN	5.677
Adipose	GTEX-1HSMP-0226	-CGQFI	2.969
Adipose	GTEX-1HSMP-1126	-B2LXJ	1.741
Adipose	GTEX-1HSMQ-1026	-ADEHU	4.144
Adipose	GTEX-1HSMQ-1426	-ADEHT	6.743
Adipose	GTEX-1HT8W-0226	-CMKGT	7.32
Adipose	GTEX-1HT8W-0726	-A9SLB	8.906
Adipose	GTEX-1HUB1-0326	-A9SKQ	5.62
Adipose	GTEX-1HUB1-1526	-CGQF6	2.978
Adipose	GTEX-1I19N-0426	-ACKVY	4.709
Adipose	GTEX-1I19N-1026	-A96TT	12.41
Adipose	GTEX-1I1CD-0226	-CM2TL	2.639
Adipose	GTEX-1I1CD-1026	-COH3G	4.454
Adipose	GTEX-1I1GP-1426	-ACKVZ	0.6716
Adipose	GTEX-1I1GP-2326	-CGQFL	2.719
Adipose	GTEX-1I1GQ-0226	-COH3I	5.342
Adipose	GTEX-1I1GQ-1026	-CNNQS	8.662
Adipose	GTEX-1I1GR-0226	-CMKHQ	4.467
Adipose	GTEX-1I1GR-1726	-COH39	4.561
Adipose	GTEX-1I1GS-0226	-B2LVX	2.156
Adipose	GTEX-1I1GS-0926	-A9SL5	4.104
Adipose	GTEX-1I1GT-0526	-CGQEQ	2.499
Adipose	GTEX-1I1GT-1326	-ACKWB	7.343
Adipose	GTEX-1I1GU-0626	-CMKHR	1.85
Adipose	GTEX-1I1GU-2326	-CGQFB	1.431
Adipose	GTEX-1I1GV-0426	-ARZLX	5.823
Adipose	GTEX-1I1HK-0226	-COH4A	7.227
Adipose	GTEX-1I4MK-0726	-ACKWC	2.425
Adipose	GTEX-1I4MK-2026	-B2LVR	1.719
Adipose	GTEX-1I6K6-0226	-ADEID	3.706
Adipose	GTEX-1I6K6-1526	-CGQFC	3.983
Adipose	GTEX-1I6K7-0226	-CJI46	2.984
Adipose	GTEX-1I6K7-1826	-CGQFO	2.705
Adipose	GTEX-1ICG6-1726	-ARU7K	1.592
Adipose	GTEX-1ICG6-2626	-CGQG1	1.161
Adipose	GTEX-1ICLY-0226	-ARL7R	1.467
Adipose	GTEX-1ICLY-1426	-CJI48	2.364
Adipose	GTEX-1ICLZ-0226	-CKZPP	4.112
Adipose	GTEX-1ICLZ-1626	-CE6SS	4.046
Adipose	GTEX-1IDFM-0226	-CMKFX	3.345
Adipose	GTEX-1IDJC-0226	-CMKG2	2.007
Adipose	GTEX-1IDJD-0926	-ACKWW	5.379
Adipose	GTEX-1IDJD-1226	-CM2TP	4.222
Adipose	GTEX-1IDJF-0226	-CMKGE	2.474
Adipose	GTEX-1IDJF-1726	-A9SLL	4.222
Adipose	GTEX-1IDJH-1626	-A9SLP	2.373
Adipose	GTEX-1IDJI-0926	-ACKWZ	13.15
Adipose	GTEX-1IDJU-0926	-ARL88	2.79
Adipose	GTEX-1IDJU-2526	-CMKGF	3.219
Adipose	GTEX-1IE54-0226	-CMKHX	3.172
Adipose	GTEX-1IE54-1426	-CL53C	5.809
Adipose	GTEX-1IGQW-0226	-COH43	7.03
Adipose	GTEX-1IKJJ-0226	-COH3T	6.194
Adipose	GTEX-1IKK5-0526	-CMKGG	4.919
Adipose	GTEX-1IKK5-0826	-ACKWN	0.9907
Adipose	GTEX-1IKOE-1726	-CNNQ6	3.806
Adipose	GTEX-1IL2U-0326	-CE6T9	9.092
Adipose	GTEX-1IL2U-2726	-C1YSG	9.287
Adipose	GTEX-1IL2V-0226	-CMKI2	3.576
Adipose	GTEX-1IOXB-0226	-CMKHY	3.526
Adipose	GTEX-1IY9M-0226	-CMKHP	5.667
Adipose	GTEX-1IY9M-1226	-ACKX1	8.089
Adipose	GTEX-1J1OQ-0326	-CYPTJ	1.633
Adipose	GTEX-1J1OQ-1526	-CJI4E	4.799
Adipose	GTEX-1J1R8-0526	-ACKWO	1.261
Adipose	GTEX-1J1R8-2226	-ARZMP	5.26
Adipose	GTEX-1J8EW-0226	-CYPSW	5.036
Adipose	GTEX-1J8EW-1526	-CMKFZ	3.961
Adipose	GTEX-1J8JJ-0326	-CMKG6	7.667
Adipose	GTEX-1J8Q2-2226	-CM2TZ	2.625
Adipose	GTEX-1J8Q3-1526	-CMKGB	4.099
Adipose	GTEX-1J8QM-2326	-CYPSL	1.583
Adipose	GTEX-1JJ6O-0226	-E6CI9	2.222
Adipose	GTEX-1JJ6O-2826	-CNNP7	5.594
Adipose	GTEX-1JJE9-1226	-CNPOI	3.946
Adipose	GTEX-1JJE9-1526	-CM2RR	1.948
Adipose	GTEX-1JJEA-0226	-COH2X	5.948
Adipose	GTEX-1JK1U-2126	-CNPOU	3.873
Adipose	GTEX-1JKYN-0526	-CGQG3	0.7831
Adipose	GTEX-1JKYN-1226	-CGQG8	2.094
Adipose	GTEX-1JKYR-0226	-CNPOK	8.628
Adipose	GTEX-1JKYR-1226	-CM2S7	1.93
Adipose	GTEX-1JMLX-0126	-CMKG9	5.463
Adipose	GTEX-1JMLX-1026	-D3L8U	3.219
Adipose	GTEX-1JMPY-0326	-CM2S2	1.229
Adipose	GTEX-1JMPY-1426	-ARL8Z	6.062
Adipose	GTEX-1JMQI-1026	-COH2U	3.799
Adipose	GTEX-1JMQI-2026	-CMKGP	3.782
Adipose	GTEX-1JMQJ-1926	-D4P3A	6.749
Adipose	GTEX-1JMQK-0126	-CM2S3	3.15
Adipose	GTEX-1JMQK-1326	-CNPOR	4.578
Adipose	GTEX-1JMQL-0326	-CNPP6	2.835
Adipose	GTEX-1JN1M-0126	-D4P23	0.8045
Adipose	GTEX-1JN6P-0226	-COH34	4.351
Adipose	GTEX-1JN6P-1626	-CYPSV	7.501
Adipose	GTEX-1JN76-0226	-CMKGO	2.179
Adipose	GTEX-1JN76-1026	-ARZNI	5.608
Adipose	GTEX-1K2DA-1126	-CGQGG	1.541
Adipose	GTEX-1K2DA-2126	-CGQGL	1.766
Adipose	GTEX-1K2DU-0726	-DIPF7	4.766
Adipose	GTEX-1K9T9-0226	-E9U6K	1.414
Adipose	GTEX-1K9T9-1626	-DIPFS	3.845
Adipose	GTEX-1KAFJ-0826	-CYPTF	3.885
Adipose	GTEX-1KAFJ-2426	-D4P32	6.711
Adipose	GTEX-1KANA-0826	-D3L9J	1.796
Adipose	GTEX-1KANA-1426	-CY8IF	1.22
Adipose	GTEX-1KANB-2426	-EV7BE	6.972
Adipose	GTEX-1KANC-0526	-D4P3T	1.491
Adipose	GTEX-1KD4Q-1426	-D4P3K	7.552
Adipose	GTEX-1KD5A-0326	-D5OVD	4.723
Adipose	GTEX-1KD5A-1326	-CYPTB	6.376
Adipose	GTEX-1KWVE-0226	-E9TKK	7.403
Adipose	GTEX-1KWVE-1326	-E6CJ1	9.045
Adipose	GTEX-1KXAM-0526	-DKPQN	2.958
Adipose	GTEX-1KXAM-2326	-CYPTD	3.997
Adipose	GTEX-1L5NE-1726	-DHXKX	5.513
Adipose	GTEX-1L5NE-2626	-E9U6P	1.905
Adipose	GTEX-1LB8K-0326	-E9TJC	8.025
Adipose	GTEX-1LBAC-0226	-DHXJZ	4.062
Adipose	GTEX-1LBAC-1026	-CXKYA	1.065
Adipose	GTEX-1LG7Y-0426	-DKPQB	6.345
Adipose	GTEX-1LG7Y-1126	-CYPTE	2.809
Adipose	GTEX-1LG7Z-0226	-E6CIG	2.092
Adipose	GTEX-1LG7Z-2026	-DLHBP	3.54
Adipose	GTEX-1LGOU-0826	-DHXKL	2.454
Adipose	GTEX-1LGOU-2226	-E9U56	1.582
Adipose	GTEX-1LGRB-0526	-COH3A	4.495
Adipose	GTEX-1LGRB-2426	-CNPP3	5.636
Adipose	GTEX-1LH75-1026	-EWROK	2.98
Adipose	GTEX-1LH75-2526	-E9U5A	3.443
Adipose	GTEX-1LKK1-1526	-EVYCO	2.519
Adipose	GTEX-1LSNL-0526	-DIPFI	8.798
Adipose	GTEX-1LSNL-1426	-E6CJ9	3.6
Adipose	GTEX-1LSNM-0626	-DIPG7	3.44
Adipose	GTEX-1LSNM-2026	-E6CIJ	3.476
Adipose	GTEX-1LSVX-0126	-EVYCY	3.935
Adipose	GTEX-1LSVX-1326	-DIPET	4.006
Adipose	GTEX-1LVA9-0226	-E9U5N	3.943
Adipose	GTEX-1LVAM-1026	-DIPFK	1.372
Adipose	GTEX-1LVAN-0126	-COH4H	2.193
Adipose	GTEX-1LVAN-0926	-CNNQ2	1.509
Adipose	GTEX-1LVAO-0226	-E9U6O	7.731
Adipose	GTEX-1LVAO-2126	-DIPGA	4.112
Adipose	GTEX-1M5QR-2126	-DKPQM	1.765
Adipose	GTEX-1MA7W-0526	-E6CIN	0.8032
Adipose	GTEX-1MA7W-1926	-E6CIO	1.291
Adipose	GTEX-1MA7X-1026	-DKPQ8	4.142
Adipose	GTEX-1MA7X-2126	-E6CIX	5.922
Adipose	GTEX-1MCC2-0626	-DKPQI	1.435
Adipose	GTEX-1MCC2-2326	-E9U5G	1.894
Adipose	GTEX-1MCQQ-1426	-E6CJA	5.154
Adipose	GTEX-1MCYP-1826	-E9J2Q	1.618
Adipose	GTEX-1MGNQ-0226	-EVYCK	2.869
Adipose	GTEX-1MJK2-0526	-DTXE6	4.848
Adipose	GTEX-1MJK3-0626	-E6CJB	1.104
Adipose	GTEX-1MUQO-0526	-E9J31	4.688
Adipose	GTEX-1MUQO-0826	-EVYCZ	0.4828
Adipose	GTEX-1N2DV-0626	-E9U5H	2.932
Adipose	GTEX-1N2DW-0326	-E9TK3	2.19
Adipose	GTEX-1N2DW-0726	-DTX97	6.776
Adipose	GTEX-1N2EE-1526	-DTXE9	4.777
Adipose	GTEX-1N2EF-0626	-E9J32	2.211
Adipose	GTEX-1N2EF-0926	-E8VNW	4.126
Adipose	GTEX-1NHNU-1126	-E9J2C	4.347
Adipose	GTEX-1NV5F-2526	-EXUSK	3.155
Adipose	GTEX-1O9I2-1326	-E6CQD	2.116
Adipose	GTEX-1OFPY-0826	-DTX8P	3.072
Adipose	GTEX-1OFPY-2326	-E8VNU	3.23
Adipose	GTEX-1OJC3-1326	-E9J3D	1.085
Adipose	GTEX-1OJC4-1726	-EXUSV	8.195
Adipose	GTEX-1OKEX-0926	-E8VNJ	2.856
Adipose	GTEX-1P4AB-1226	-DTXET	9.663
Adipose	GTEX-1PBJI-0426	-E8VNM	1.996
Adipose	GTEX-1PBJI-1326	-E9J2V	1.082
Adipose	GTEX-1PDJ9-0426	-E9J3E	2.87
Adipose	GTEX-1PFEY-0726	-E76PO	0.5751
Adipose	GTEX-1PFEY-1626	-E9J3M	2.259
Adipose	GTEX-1PIGE-0526	-DTXFA	4.994
Adipose	GTEX-1PIGE-1226	-EVR3Q	0.6021
Adipose	GTEX-1PIIG-0326	-EVYBV	2.982
Adipose	GTEX-1POEN-0226	-EYYXE	3.757
Adipose	GTEX-1POEN-1626	-EVYC2	2.088
Adipose	GTEX-1PPGY-0326	-DTXFD	5.493
Adipose	GTEX-1PPH8-0626	-EWRN9	2.638
Adipose	GTEX-1PPH8-1026	-DPRXN	0.7799
Adipose	GTEX-1PWST-0326	-EAZ42	1.829
Adipose	GTEX-1QAET-1126	-E8VML	1.368
Adipose	GTEX-1QAET-1226	-DTX9I	7.006
Adipose	GTEX-1QCLY-0526	-EAZ47	7.538
Adipose	GTEX-1QCLY-1226	-EVYC3	1.481
Adipose	GTEX-1QEPI-0226	-EWRMR	4.022
Adipose	GTEX-1QEPI-2226	-E8VN6	0.7256
Adipose	GTEX-1QMI2-1626	-EYYXK	3.805
Adipose	GTEX-1QP28-0226	-E9J2N	4.272
Adipose	GTEX-1QP28-0926	-EVR4D	4.075
Adipose	GTEX-1QP29-0726	-DTXFM	1.756
Adipose	GTEX-1QP29-1626	-EXUSZ	0.9767
Adipose	GTEX-1QP2A-0226	-EVYBC	7.355
Adipose	GTEX-1QP66-0626	-E76PD	6.118
Adipose	GTEX-1QP66-1326	-DTXDQ	3.425
Adipose	GTEX-1QP67-1126	-EAZ4C	1.969
Adipose	GTEX-1QP67-1726	-E8VOP	1.566
Adipose	GTEX-1QP6S-0126	-E9J4K	2.488
Adipose	GTEX-1QP6S-1626	-EVYC5	4.641
Adipose	GTEX-1QP9N-0426	-DTXFT	6.179
Adipose	GTEX-1QP9N-1526	-DTXFK	2.885
Adipose	GTEX-1QPFJ-0126	-E9J4B	2.779
Adipose	GTEX-1QPFJ-2126	-EXOJV	3.181
Adipose	GTEX-1QW4Y-0826	-DTXE1	4.555
Adipose	GTEX-1QW4Y-1626	-EAZ41	3.503
Adipose	GTEX-1R46S-0526	-EVYBZ	1.432
Adipose	GTEX-1R7EU-0326	-EWRNJ	3.066
Adipose	GTEX-1R7EV-1026	-DTX81	1.409
Adipose	GTEX-1R7EV-1926	-EVYBF	0.8728
Adipose	GTEX-1R9K4-1426	-DPRY4	1.116
Adipose	GTEX-1R9K5-0226	-EWRNF	9.75
Adipose	GTEX-1R9PM-2126	-E8VOB	4.181
Adipose	GTEX-1R9PO-0926	-E9U4Q	4.034
Adipose	GTEX-1RAZA-0226	-E9U4W	5.082
Adipose	GTEX-1RAZA-0926	-E6CQ8	4.53
Adipose	GTEX-1RAZQ-0626	-E8VOR	2.657
Adipose	GTEX-1RAZQ-1526	-E6CJI	0.8783
Adipose	GTEX-1RAZR-0226	-EVYC6	4.082
Adipose	GTEX-1RAZR-1026	-E8VOJ	7.095
Adipose	GTEX-1RB15-1126	-E8VMX	2.545
Adipose	GTEX-1RDX4-0226	-DTXG1	3.589
Adipose	GTEX-1RLM8-1026	-EWROE	2.999
Adipose	GTEX-1RMOY-0826	-E9TIF	9.343
Adipose	GTEX-1RNTQ-0826	-E9TK8	0.5444
Adipose	GTEX-1RQEC-0526	-E6CHV	3.968
Adipose	GTEX-1RQEC-2526	-EVYD2	4.031
Adipose	GTEX-1S3DN-1626	-EVYCC	3.544
Adipose	GTEX-1S5VW-2426	-EAZ52	4.345
Adipose	GTEX-1S5ZA-1026	-EWRO2	0.5445
Adipose	GTEX-1S5ZU-0226	-E6CHW	6.372
Adipose	GTEX-1S82P-0226	-E6CI6	1.596
Adipose	GTEX-1S82P-0926	-EWRNP	1.972
Adipose	GTEX-1S831-0326	-EVYD3	4.454
Adipose	GTEX-1S831-1926	-EV79P	1.659
Adipose	GTEX-1S83E-0226	-EVYCW	7.982
Adipose	GTEX-N7MS-0326	-4E3K2	3.52
Adipose	GTEX-NFK9-0326	-3MJGV	6.333
Adipose	GTEX-NPJ8-0226	-48TBN	2.154
Adipose	GTEX-O5YT-0226	-32PK5	2.704
Adipose	GTEX-O5YV-0226	-48TBY	1.513
Adipose	GTEX-OHPK-0226	-3MJH6	4.089
Adipose	GTEX-OHPM-0226	-3LK61	7.531
Adipose	GTEX-OHPN-0226	-48TBV	2.797
Adipose	GTEX-OIZF-0226	-E9TI3	4.11
Adipose	GTEX-OIZG-0826	-E9TI4	4.75
Adipose	GTEX-OIZH-0226	-2YUMH	4.906
Adipose	GTEX-OIZI-0226	-2XCEE	3
Adipose	GTEX-OOBJ-0226	-2YUMM	12.85
Adipose	GTEX-OOBK-0226	-2YUMF	0.9463
Adipose	GTEX-OXRK-0326	-3NB3R	5.163
Adipose	GTEX-OXRL-0226	-3NB18	2.751
Adipose	GTEX-OXRN-0226	-2I5EJ	4.406
Adipose	GTEX-OXRO-0226	-3LK6F	3.221
Adipose	GTEX-OXRP-0226	-3NB14	2.295
Adipose	GTEX-P44G-2326	-2XCCZ	0.9878
Adipose	GTEX-P44H-0326	-2XCES	2.472
Adipose	GTEX-P4PP-0226	-D4P1Z	3.713
Adipose	GTEX-P4PQ-0226	-2S1NK	1.585
Adipose	GTEX-P4QS-0226	-3NB1U	4.363
Adipose	GTEX-P4QT-0226	-3LK68	8.894
Adipose	GTEX-P78B-0226	-3NB1Z	6.06
Adipose	GTEX-PLZ4-0226	-CYPR1	4.323
Adipose	GTEX-PLZ5-1826	-3NB22	5.679
Adipose	GTEX-PLZ6-1326	-3NB24	1.127
Adipose	GTEX-POMQ-2326	-DHXIS	2.969
Adipose	GTEX-POYW-0726	-2XCEO	3.523
Adipose	GTEX-PSDG-0326	-48TCP	3.453
Adipose	GTEX-PWCY-1926	-3NB25	1.216
Adipose	GTEX-PWN1-0226	-DKPO9	1.982
Adipose	GTEX-PX3G-0226	-DKPOF	2.642
Adipose	GTEX-Q2AG-0226	-2S1P4	3.873
Adipose	GTEX-Q2AH-1726	-DIPDV	1.449
Adipose	GTEX-Q2AI-1426	-2S1P5	4.196
Adipose	GTEX-Q734-1826	-2I3EL	4.036
Adipose	GTEX-QCQG-1826	-2S1P2	2.738
Adipose	GTEX-QDT8-0226	-32PL4	1.79
Adipose	GTEX-QDVJ-1826	-2S1P3	3.051
Adipose	GTEX-QDVN-2126	-33HBS	3.513
Adipose	GTEX-QEG4-0326	-DIPE3	5.71
Adipose	GTEX-QEG5-0326	-2S1PB	1.589
Adipose	GTEX-QEL4-0326	-3GAE5	4.954
Adipose	GTEX-QESD-1526	-2S1QT	2.743
Adipose	GTEX-QLQ7-1526	-2S1QA	4.475
Adipose	GTEX-QLQW-1226	-2S1Q9	1.791
Adipose	GTEX-QMRM-1726	-2S1QG	6.087
Adipose	GTEX-QV31-1326	-2S1QE	2.46
Adipose	GTEX-QV44-1825	-447CF	4.272
Adipose	GTEX-R3RS-0226	-EYYVE	3.177
Adipose	GTEX-R45C-0226	-EVYAJ	4.796
Adipose	GTEX-R53T-1626	-3GAEW	7.209
Adipose	GTEX-R55C-1626	-48FEG	3.555
Adipose	GTEX-R55D-0326	-48FES	3.092
Adipose	GTEX-R55G-2426	-2TC5I	1.237
Adipose	GTEX-REY6-0326	-2TF5A	1.521
Adipose	GTEX-RM2N-1726	-2TF55	4.415
Adipose	GTEX-RNOR-0226	-EZ6MF	5.31
Adipose	GTEX-RTLS-0226	-2TF5E	2.845
Adipose	GTEX-RU72-1026	-46MUG	3.077
Adipose	GTEX-RUSQ-1626	-EZ6L4	1.716
Adipose	GTEX-RVPV-1526	-EXOHF	2.313
Adipose	GTEX-RWSA-0226	-2XCBA	5.752
Adipose	GTEX-S32W-2226	-2XCAY	2.5
Adipose	GTEX-S33H-1126	-2XCB6	5.427
Adipose	GTEX-S4P3-1526	-E9J3W	1.658
Adipose	GTEX-S7SE-0226	-2XCD4	4.029
Adipose	GTEX-S95S-1326	-2XCDK	3.322
Adipose	GTEX-SIU8-0226	-2XCDS	5.548
Adipose	GTEX-SJXC-0226	-2XCDU	3.491
Adipose	GTEX-SN8G-0226	-4DM6B	3.293
Adipose	GTEX-SNMC-1326	-2XCFK	2.533
Adipose	GTEX-SNOS-1426	-32PLY	4.148
Adipose	GTEX-SSA3-0226	-32QPN	6.594
Adipose	GTEX-SUCS-1826	-32PM1	1.959
Adipose	GTEX-T2IS-0226	-32QPH	3.949
Adipose	GTEX-T5JC-0526	-32PM7	4.2
Adipose	GTEX-T5JW-1726	-3GADN	0.5708
Adipose	GTEX-T6MN-0226	-32PMD	4.747
Adipose	GTEX-T6MO-1726	-33HB8	1.763
Adipose	GTEX-T8EM-1126	-3DB7D	4.553
Adipose	GTEX-TKQ1-1126	-4GIAZ	1.894
Adipose	GTEX-TML8-2026	-32QOP	4.131
Adipose	GTEX-TMZS-0226	-3DB9N	2.371
Adipose	GTEX-TSE9-0226	-3DB84	5.058
Adipose	GTEX-U3ZM-1026	-EZ6LD	2.148
Adipose	GTEX-U3ZN-2626	-3DB7T	4.474
Adipose	GTEX-U412-0526	-3DB9I	2.331
Adipose	GTEX-U4B1-1726	-3DB9F	2.322
Adipose	GTEX-U8XE-0426	-3DB91	0.4387
Adipose	GTEX-U8XE-1926	-3DB98	1.646
Adipose	GTEX-UJHI-1626	-3DB9A	4.014
Adipose	GTEX-UPK5-1826	-3GAEB	11.62
Adipose	GTEX-UTHO-0426	-CE6QU	9.927
Adipose	GTEX-UTHO-1826	-3GAFE	4.006
Adipose	GTEX-VJWN-0226	-EZ6LF	3.747
Adipose	GTEX-VJWN-2326	-EVYAP	5.361
Adipose	GTEX-VJYA-1326	-3GIJC	3.294
Adipose	GTEX-VJYA-1626	-EXOHL	2.964
Adipose	GTEX-VUSG-1426	-3GIJN	2.124
Adipose	GTEX-VUSG-2426	-4KKZG	2.619
Adipose	GTEX-VUSH-0226	-EXUQV	3.095
Adipose	GTEX-W5WG-2526	-4SOJ2	1.342
Adipose	GTEX-W5X1-1426	-3GIKH	2.687
Adipose	GTEX-W5X1-2626	-4LMI8	6.921
Adipose	GTEX-WEY5-1326	-3GILS	2.35
Adipose	GTEX-WEY5-1926	-3GIL8	1.934
Adipose	GTEX-WFG7-2526	-EWRM5	1.256
Adipose	GTEX-WFG8-2326	-DIPDX	1.553
Adipose	GTEX-WFJO-1026	-3GIKL	0.7509
Adipose	GTEX-WFJO-1926	-3GILA	2.051
Adipose	GTEX-WFON-1226	-3TW8F	2.901
Adipose	GTEX-WFON-2226	-3TW8W	5.329
Adipose	GTEX-WH7G-1126	-3NMBK	0.7663
Adipose	GTEX-WH7G-2226	-3NMBN	2.369
Adipose	GTEX-WHPG-0626	-3NMBD	2.262
Adipose	GTEX-WHPG-2126	-4M1ZM	3.635
Adipose	GTEX-WHWD-0826	-3LK6R	7.91
Adipose	GTEX-WI4N-1126	-3LK7Q	4.19
Adipose	GTEX-WI4N-1526	-EZ6LG	3.916
Adipose	GTEX-WK11-2426	-3NMAA	2.642
Adipose	GTEX-WL46-0326	-3LK6Y	6.808
Adipose	GTEX-WL46-2026	-3LK7U	3.294
Adipose	GTEX-WOFM-0726	-3MJF8	2.464
Adipose	GTEX-WRHK-0826	-3MJFG	3.094
Adipose	GTEX-WVJS-0226	-4MVOU	5.653
Adipose	GTEX-WVLH-0226	-3MJG6	3.358
Adipose	GTEX-WVLH-1626	-EXURN	6.547
Adipose	GTEX-WWTW-1326	-4MVNT	3.107
Adipose	GTEX-WXYG-0926	-3NB2O	4.297
Adipose	GTEX-WY7C-0926	-3NB34	3.105
Adipose	GTEX-WY7C-2426	-3NB2V	1.783
Adipose	GTEX-WYBS-1026	-4ONCY	7.261
Adipose	GTEX-WYJK-0226	-EYYV8	4.051
Adipose	GTEX-WYJK-1426	-3NM8V	1.025
Adipose	GTEX-WYVS-0626	-4SOJY	8.785
Adipose	GTEX-X15G-2326	-4PQZS	2.9
Adipose	GTEX-X261-0226	-3NMD2	5.213
Adipose	GTEX-X3Y1-0926	-3P5YT	7.016
Adipose	GTEX-X4EO-0426	-4QASA	3.545
Adipose	GTEX-X4LF-1726	-3NMBZ	3.645
Adipose	GTEX-X4XY-0326	-46MVZ	2.442
Adipose	GTEX-X585-2526	-4QAS1	7.07
Adipose	GTEX-X5EB-2426	-4E3HX	4.237
Adipose	GTEX-X638-0226	-47JZ9	6.416
Adipose	GTEX-X88G-0226	-4GIE4	3.481
Adipose	GTEX-X8HC-0226	-4E3K1	0.9971
Adipose	GTEX-X8HC-2326	-4QAS4	4.012
Adipose	GTEX-XAJ8-0226	-4GIB2	2.891
Adipose	GTEX-XAJ8-0926	-47JXZ	4.848
Adipose	GTEX-XBEC-0326	-4AT4M	4.816
Adipose	GTEX-XBEC-1826	-4QASN	9.637
Adipose	GTEX-XBED-1326	-4AT4F	1.199
Adipose	GTEX-XBED-2326	-47JYR	3.988
Adipose	GTEX-XBEW-0726	-4QARX	2.943
Adipose	GTEX-XBEW-1726	-4RGMA	0.929
Adipose	GTEX-XGQ4-1026	-4AT4L	4.083
Adipose	GTEX-XGQ4-2226	-4AT4Y	4.282
Adipose	GTEX-XK95-0426	-4AT4R	2.222
Adipose	GTEX-XLM4-0226	-4AT4N	3.825
Adipose	GTEX-XLM4-1026	-4AT51	7.805
Adipose	GTEX-XMD2-0226	-4WWEE	3.395
Adipose	GTEX-XMK1-0926	-4B66X	3.185
Adipose	GTEX-XMK1-2226	-4B673	3.527
Adipose	GTEX-XOT4-0226	-4B66Z	5.234
Adipose	GTEX-XOT4-0826	-4B66Y	12.12
Adipose	GTEX-XPVG-1626	-EYYVK	0.5081
Adipose	GTEX-XPVG-2726	-4B66W	1.926
Adipose	GTEX-XQ3S-1626	-4WAYN	5.821
Adipose	GTEX-XQ3S-2426	-4WAYB	10.99
Adipose	GTEX-XQ8I-0526	-4BOPS	4.936
Adipose	GTEX-XQ8I-1426	-4BOPW	6.196
Adipose	GTEX-XUW1-0526	-4BOP3	3.603
Adipose	GTEX-XUYS-0226	-47JX1	3.59
Adipose	GTEX-XUZC-1126	-4BOPZ	2.153
Adipose	GTEX-XUZC-1826	-4BRVO	1.777
Adipose	GTEX-XV7Q-1726	-4BRUU	4.639
Adipose	GTEX-XV7Q-2626	-4BRVA	4.935
Adipose	GTEX-XXEK-1426	-4BRW1	3.27
Adipose	GTEX-XXEK-2426	-4BRUS	2.669
Adipose	GTEX-XYKS-1826	-4E3JV	3.352
Adipose	GTEX-XYKS-2726	-4E3IC	3.02
Adipose	GTEX-Y111-0226	-4SOIW	7.208
Adipose	GTEX-Y111-0926	-4SOIU	5.406
Adipose	GTEX-Y114-1326	-4TT9A	0.7254
Adipose	GTEX-Y114-2326	-4TT7X	1.775
Adipose	GTEX-Y3I4-0726	-E9J3Y	1.657
Adipose	GTEX-Y3I4-2226	-4TT7O	3.405
Adipose	GTEX-Y3IK-2526	-4WWDM	2.277
Adipose	GTEX-Y5LM-0826	-4VDSW	0.9012
Adipose	GTEX-Y5V5-0226	-5S2N8	2.548
Adipose	GTEX-Y5V5-2426	-5IFJA	3.121
Adipose	GTEX-Y5V6-0626	-4WWFY	4.948
Adipose	GTEX-Y5V6-2526	-5IFJV	0.7737
Adipose	GTEX-Y8E4-0726	-4WWFN	6.667
Adipose	GTEX-Y8E4-1226	-5IFIM	9.133
Adipose	GTEX-Y8E5-0226	-57WCM	2.926
Adipose	GTEX-Y8LW-0926	-4VBQ8	1.277
Adipose	GTEX-Y8LW-1926	-4WWFZ	2.584
Adipose	GTEX-Y9LG-1226	-4VBQA	0.7285
Adipose	GTEX-Y9LG-2026	-62LFS	1.101
Adipose	GTEX-YB5E-2126	-5IFI7	0.7922
Adipose	GTEX-YB5K-2226	-4WWG1	1.964
Adipose	GTEX-YEC3-0926	-5Q5AC	0.6235
Adipose	GTEX-YEC3-1226	-5IFI8	4.957
Adipose	GTEX-YEC4-0926	-5PNXY	0.9154
Adipose	GTEX-YEC4-2426	-57WFO	3.546
Adipose	GTEX-YECK-0226	-4W215	9.325
Adipose	GTEX-YECK-1426	-5IFHE	7.705
Adipose	GTEX-YF7O-2426	-5IFJL	2.487
Adipose	GTEX-YFC4-0226	-57WD2	2.489
Adipose	GTEX-YFCO-1126	-5S2N9	3.596
Adipose	GTEX-YFCO-2026	-4W21Q	3.936
Adipose	GTEX-YJ89-0226	-4TT3Y	4.02
Adipose	GTEX-YJ89-1926	-5IFJ6	4.059
Adipose	GTEX-YJ8A-0526	-5IFHT	5.197
Adipose	GTEX-YJ8A-1926	-EZ6LQ	3.296
Adipose	GTEX-YJ8O-2426	-5HL7S	2.813
Adipose	GTEX-Z93S-0226	-5HL7R	4.21
Adipose	GTEX-Z93T-0226	-5HL5Z	3.805
Adipose	GTEX-Z9EW-0826	-5HL9T	1.384
Adipose	GTEX-Z9EW-1826	-5CVMA	4.165
Adipose	GTEX-ZA64-0926	-5HL7H	0.594
Adipose	GTEX-ZAB4-1426	-5CVN6	4.895
Adipose	GTEX-ZAB5-1126	-5Q5AD	9.419
Adipose	GTEX-ZAJG-0226	-5HL81	0.9658
Adipose	GTEX-ZAJG-1626	-5HL7I	4.873
Adipose	GTEX-ZAK1-0226	-5CVMX	2.387
Adipose	GTEX-ZC5H-0126	-4WAYL	2.408
Adipose	GTEX-ZC5H-1626	-5HL7L	4.91
Adipose	GTEX-ZDTS-0226	-5HL7Q	5.358
Adipose	GTEX-ZDTS-1826	-5S2N6	4.89
Adipose	GTEX-ZDTT-0526	-5HL4M	0.9982
Adipose	GTEX-ZDTT-2626	-5S2OP	1.421
Adipose	GTEX-ZDXO-2326	-5LU9W	4.698
Adipose	GTEX-ZDXO-2426	-5S2NJ	2.966
Adipose	GTEX-ZDYS-2126	-5S2P2	1.607
Adipose	GTEX-ZDYS-2226	-5S2MI	0.8455
Adipose	GTEX-ZE7O-0226	-5S2N1	3.303
Adipose	GTEX-ZE7O-1526	-5J1NH	3.028
Adipose	GTEX-ZE9C-1326	-5S2OW	4.977
Adipose	GTEX-ZE9C-2826	-5S2MO	3.028
Adipose	GTEX-ZEX8-1226	-5S2OK	3.27
Adipose	GTEX-ZEX8-2326	-5S2MN	6.263
Adipose	GTEX-ZF28-0226	-5S2OE	2.765
Adipose	GTEX-ZF28-1426	-5S2OG	7.698
Adipose	GTEX-ZF29-0826	-5S2O2	0.7493
Adipose	GTEX-ZF29-2226	-4WWB9	2.732
Adipose	GTEX-ZF2S-1526	-5S2OO	3.139
Adipose	GTEX-ZF3C-0226	-4WWB3	2.39
Adipose	GTEX-ZF3C-1026	-5S2OC	4.365
Adipose	GTEX-ZG7Y-1626	-5S2NO	4.166
Adipose	GTEX-ZGAY-0626	-DO92E	3.277
Adipose	GTEX-ZGAY-1326	-5S2NS	4.923
Adipose	GTEX-ZLFU-2626	-DO91L	4.05
Adipose	GTEX-ZLV1-0926	-5S2MR	0.585
Adipose	GTEX-ZLV1-1826	-5FQU5	1.984
Adipose	GTEX-ZLWG-0726	-5S2N4	0.7824
Adipose	GTEX-ZLWG-2226	-DO92V	2.712
Adipose	GTEX-ZP4G-1326	-5EGIW	1.191
Adipose	GTEX-ZP4G-2326	-57WEM	2.246
Adipose	GTEX-ZPCL-1026	-5GCOX	1.34
Adipose	GTEX-ZPCL-2126	-57WFZ	2.356
Adipose	GTEX-ZPIC-0726	-57WFM	6.363
Adipose	GTEX-ZPIC-1826	-57WFE	1.639
Adipose	GTEX-ZPU1-1226	-5HL71	6.476
Adipose	GTEX-ZPU1-2426	-4WWFM	5.245
Adipose	GTEX-ZQG8-1026	-51MR9	1.592
Adipose	GTEX-ZQG8-1526	-5HL65	0.7352
Adipose	GTEX-ZQUD-0526	-57WG4	0.6429
Adipose	GTEX-ZT9W-1026	-57WG5	0.8078
Adipose	GTEX-ZT9X-0926	-5O9C4	10.59
Adipose	GTEX-ZT9X-1926	-57WE7	4.125
Adipose	GTEX-ZTPG-0226	-5O99I	1.605
Adipose	GTEX-ZTPG-2326	-57WFL	4.774
Adipose	GTEX-ZTSS-1026	-5985N	0.3165
Adipose	GTEX-ZTSS-2026	-5987K	2.897
Adipose	GTEX-ZTX8-0726	-59HL9	0.9113
Adipose	GTEX-ZTX8-1526	-5N9GI	3.692
Adipose	GTEX-ZUA1-0226	-5NQ9Q	4.582
Adipose	GTEX-ZUA1-2126	-57YRB	9.715
Adipose	GTEX-ZV68-0226	-59HJF	4.22
Adipose	GTEX-ZV6S-1626	-5NQ81	1.113
Adipose	GTEX-ZV7C-0826	-59HK8	0.3064
Adipose	GTEX-ZVE2-0326	-57WFC	4.039
Adipose	GTEX-ZVE2-1826	-51MRZ	4.633
Adipose	GTEX-ZVP2-0226	-57WBD	2.207
Adipose	GTEX-ZVP2-1826	-5GU62	2.131
Adipose	GTEX-ZVT2-0226	-5GIE3	1.585
Adipose	GTEX-ZVT2-2226	-5NQ6P	2.419
Adipose	GTEX-ZVT4-0226	-51MSD	1.775
Adipose	GTEX-ZVTK-0526	-5GZWT	2.935
Adipose	GTEX-ZVZO-0226	-5A5LA	2.598
Adipose	GTEX-ZVZP-1126	-5GICU	0.698
Adipose	GTEX-ZVZP-2326	-59HL4	4.561
Adipose	GTEX-ZXES-0926	-5E43O	0.4969
Adipose	GTEX-ZXES-2026	-5NQ6R	1.756
Adipose	GTEX-ZXG5-0226	-59HJI	6.005
Adipose	GTEX-ZXG5-1626	-59HJK	3.274
Adipose	GTEX-ZYFC-0326	-5NQ7H	4.342
Adipose	GTEX-ZYFC-1826	-5GZZA	1.838
Adipose	GTEX-ZYFD-0226	-5NQ86	1.501
Adipose	GTEX-ZYFG-1426	-5GICS	1.134
Adipose	GTEX-ZYT6-0326	-7LG5R	6.147
Adipose	GTEX-ZYT6-2126	-5GZZ4	5.259
Adipose	GTEX-ZYVF-0226	-5GIEG	0.9515
Adipose	GTEX-ZYVF-1026	-5E44V	2.149
Adipose	GTEX-ZYW4-0226	-5E44M	3.522
Adipose	GTEX-ZYW4-2226	-5GZYG	4.871
Adipose	GTEX-ZYY3-0226	-5E45M	1.147
Adipose	GTEX-ZZ64-0626	-5GZWR	1.376
Adipose	GTEX-ZZ64-1626	-5E43W	2.462
Adipose	GTEX-ZZPU-0326	-5N9BJ	4.92
Adipose	GTEX-ZZPU-2726	-5NQ8O	3.02
Adrenal	GTEX-111CU-0126	-5GZWZ	6.199
Adrenal	GTEX-111YS-0126	-5987T	3.665
Adrenal	GTEX-1122O-0326	-5H124	6.087
Adrenal	GTEX-117YX-0126	-5EGH5	3.799
Adrenal	GTEX-11DXX-0126	-5EGH7	11.03
Adrenal	GTEX-11DXY-1626	-5H12L	4.477
Adrenal	GTEX-11DXZ-0226	-5EGGZ	4.263
Adrenal	GTEX-11EM3-0326	-5A5KJ	5.319
Adrenal	GTEX-11EMC-0526	-5EGJN	1.131
Adrenal	GTEX-11EQ9-0126	-5986I	3.888
Adrenal	GTEX-11GSP-0326	-5A5KW	0.9449
Adrenal	GTEX-11I78-1826	-5A5M4	6.459
Adrenal	GTEX-11NSD-0226	-5A5LR	6.997
Adrenal	GTEX-11P7K-0126	-5986E	5.115
Adrenal	GTEX-11TT1-0126	-5LUAA	6.048
Adrenal	GTEX-11XUK-0126	-5CVLK	2.809
Adrenal	GTEX-1211K-0126	-59HJE	3.678
Adrenal	GTEX-12696-0626	-5EGGD	4.503
Adrenal	GTEX-12BJ1-0526	-5FQUD	6.234
Adrenal	GTEX-12WSD-2126	-5LZWK	1.013
Adrenal	GTEX-12WSG-0726	-5EGIG	4.758
Adrenal	GTEX-12WSJ-0126	-5GCOM	3.909
Adrenal	GTEX-12WSK-0326	-5GCOJ	5.039
Adrenal	GTEX-12WSL-0326	-5CVMK	4.58
Adrenal	GTEX-12WSN-0926	-5GCN1	2.091
Adrenal	GTEX-12ZZZ-0926	-5N9EQ	1.582
Adrenal	GTEX-13111-0326	-5DUXF	2.278
Adrenal	GTEX-131XF-0126	-5DUVF	5.874
Adrenal	GTEX-131XG-1326	-5DUX4	6.215
Adrenal	GTEX-131YS-2026	-5P9J8	2.342
Adrenal	GTEX-132AR-1726	-5EGHQ	4.465
Adrenal	GTEX-132NY-2226	-5J2LZ	1.335
Adrenal	GTEX-132QS-0126	-5IFH9	4.902
Adrenal	GTEX-1339X-0826	-5J2O6	5.58
Adrenal	GTEX-1399R-0326	-5KM1X	9.609
Adrenal	GTEX-1399S-0426	-5IFG5	4.517
Adrenal	GTEX-1399U-0226	-5P9J2	6.484
Adrenal	GTEX-139YR-0126	-5IJEY	6.01
Adrenal	GTEX-13CF3-0126	-5IFFM	4.613
Adrenal	GTEX-13D11-0426	-5LZYA	6.018
Adrenal	GTEX-13FH7-0226	-5IFGG	1.616
Adrenal	GTEX-13FTW-0126	-5IJED	4.892
Adrenal	GTEX-13N11-0826	-5IJFP	9.702
Adrenal	GTEX-13O1R-2326	-5IJF9	0.5215
Adrenal	GTEX-13O21-0126	-5IJE8	3.906
Adrenal	GTEX-13O3O-1626	-5KM1O	1.442
Adrenal	GTEX-13O61-0126	-5KM4P	3.967
Adrenal	GTEX-13OVI-1226	-5J2ME	7.32
Adrenal	GTEX-13OW6-1726	-5IJGI	1.682
Adrenal	GTEX-13OW7-2726	-5L3HN	1.683
Adrenal	GTEX-13PL7-1026	-5MR5C	3.815
Adrenal	GTEX-13PVR-0226	-5RQJI	3.668
Adrenal	GTEX-13QBU-0526	-5IJFE	3.63
Adrenal	GTEX-13W3W-1326	-5LU4T	3.722
Adrenal	GTEX-144GL-1826	-79OMB	2.007
Adrenal	GTEX-145LT-0126	-5S2QJ	6.355
Adrenal	GTEX-145MN-0226	-5QGPY	7.621
Adrenal	GTEX-146FR-1526	-5SIB8	5.459
Adrenal	GTEX-14753-1726	-5NQ9X	0.2118
Adrenal	GTEX-147F4-2526	-5NQBB	0.7251
Adrenal	GTEX-14A5H-2126	-7IGNV	3.676
Adrenal	GTEX-14A5I-2126	-5NQA8	0.6427
Adrenal	GTEX-14BMU-0126	-5S2Q9	8.842
Adrenal	GTEX-14C38-1726	-5RQJC	3.141
Adrenal	GTEX-14DAQ-1826	-5S2VV	6.697
Adrenal	GTEX-14DAR-1726	-664MZ	2.701
Adrenal	GTEX-14E1K-0626	-5S2PG	2.641
Adrenal	GTEX-14E6E-0126	-73KXH	5.662
Adrenal	GTEX-14H4A-0226	-5SI6Q	5.093
Adrenal	GTEX-14JG6-0126	-68726	6.197
Adrenal	GTEX-14PJ4-0426	-6871F	5.224
Adrenal	GTEX-14PJ6-0126	-686Z5	4.511
Adrenal	GTEX-14PJM-2226	-6AJAT	0.6198
Adrenal	GTEX-14PK6-0126	-664O1	5.021
Adrenal	GTEX-14PKV-0726	-686ZF	5.039
Adrenal	GTEX-14PN3-1426	-686Z8	8.62
Adrenal	GTEX-14XAO-0326	-6ETZN	2.634
Adrenal	GTEX-15CHR-0626	-7938V	7.394
Adrenal	GTEX-15DYW-2126	-6M47B	2.513
Adrenal	GTEX-15ER7-1126	-6M47F	3.55
Adrenal	GTEX-15EU6-0326	-6M48I	4.715
Adrenal	GTEX-15SHU-1926	-7KUMO	6.607
Adrenal	GTEX-16AAH-0226	-793A8	9.771
Adrenal	GTEX-16MT8-1626	-7EWDW	1.785
Adrenal	GTEX-16NGA-0126	-72D6U	6.264
Adrenal	GTEX-17HGU-0126	-7DHLV	5.231
Adrenal	GTEX-17HHE-0226	-79399	5.983
Adrenal	GTEX-17HHY-2226	-7KFS4	2.093
Adrenal	GTEX-17KNJ-0326	-7KFS5	6.778
Adrenal	GTEX-18A6Q-1826	-72D6I	1.955
Adrenal	GTEX-18A7A-1826	-7KFTU	2.139
Adrenal	GTEX-18D9B-1926	-7KFSV	4.36
Adrenal	GTEX-1A32A-2126	-718AZ	0.5427
Adrenal	GTEX-1A3MV-0226	-731FS	4.953
Adrenal	GTEX-1A3MW-2126	-731DO	2.915
Adrenal	GTEX-1A8FM-1926	-7MXTX	2.281
Adrenal	GTEX-1AMFI-0626	-731DR	4.052
Adrenal	GTEX-1AX8Z-2426	-72D7D	4.853
Adrenal	GTEX-1AX9J-0626	-72D7L	3.07
Adrenal	GTEX-1AX9K-0126	-7PC1B	6.418
Adrenal	GTEX-1B8KE-0926	-7189I	8.664
Adrenal	GTEX-1B8KZ-0126	-7DHM5	2.26
Adrenal	GTEX-1B8L1-1326	-7MKG6	3.395
Adrenal	GTEX-1B996-2026	-7MKG7	0.3574
Adrenal	GTEX-1BAJH-2626	-7EPG6	3.63
Adrenal	GTEX-1C475-0126	-731DC	5.618
Adrenal	GTEX-1CAMR-0126	-79391	7.419
Adrenal	GTEX-1CAMS-0226	-79397	6.168
Adrenal	GTEX-1CB4F-0126	-9JGGZ	7.48
Adrenal	GTEX-1EH9U-1726	-7P8QK	1.066
Adrenal	GTEX-1EKGG-2126	-7MKFT	1.816
Adrenal	GTEX-1F5PK-0826	-7MXVI	3.472
Adrenal	GTEX-1F5PL-2326	-7MKFC	2.004
Adrenal	GTEX-1F75A-2026	-9KNTR	0.8337
Adrenal	GTEX-1F75I-0126	-9WPPW	4.537
Adrenal	GTEX-1F88F-1526	-9JGG1	1.816
Adrenal	GTEX-1GF9V-2026	-9JGHS	0.3256
Adrenal	GTEX-1GL5R-1026	-7P8U1	3.085
Adrenal	GTEX-1GMR3-0926	-9WPP9	0.5437
Adrenal	GTEX-1GN1V-1626	-7PBZF	0.2111
Adrenal	GTEX-1GN73-1526	-9WPP1	1.481
Adrenal	GTEX-1H11D-2426	-9JGGN	3.424
Adrenal	GTEX-1H1E6-1026	-9JGFZ	3.192
Adrenal	GTEX-1H3VY-1826	-9JGI4	7.603
Adrenal	GTEX-1HBPI-1926	-CE6RT	0.7602
Adrenal	GTEX-1HC8U-0226	-9WG7Q	6.696
Adrenal	GTEX-1HCU6-1826	-C1YRN	0.787
Adrenal	GTEX-1HKZK-0126	-B2LWF	5.448
Adrenal	GTEX-1I1GP-1826	-C1YS1	1.073
Adrenal	GTEX-1I1GQ-2026	-ARU7F	3.26
Adrenal	GTEX-1I1GT-0126	-B2LWM	6.296
Adrenal	GTEX-1I1GU-0226	-AHZ2J	5.732
Adrenal	GTEX-1I1GV-1826	-CNNR8	2.24
Adrenal	GTEX-1ICG6-0226	-AHZ2P	3.964
Adrenal	GTEX-1IDJH-1726	-A96T3	0.665
Adrenal	GTEX-1IDJU-0126	-CNNR2	3.764
Adrenal	GTEX-1J8EW-1826	-C1YQW	11.19
Adrenal	GTEX-1J8Q3-0326	-CE6TD	6.073
Adrenal	GTEX-1JKYN-0126	-AHZ4C	4.37
Adrenal	GTEX-1JMLX-1126	-CXZJN	2.051
Adrenal	GTEX-1K2DA-0226	-CGQGW	4.836
Adrenal	GTEX-1K2DU-0826	-DHXKA	2.204
Adrenal	GTEX-1KANB-2626	-EV7BF	1.987
Adrenal	GTEX-1KD4Q-1826	-DIPFV	0.5168
Adrenal	GTEX-1KWVE-0726	-D4P3O	5.106
Adrenal	GTEX-1KXAM-0326	-EV7AQ	3.272
Adrenal	GTEX-1LG7Z-0426	-D4P47	5.994
Adrenal	GTEX-1LGRB-0326	-CNPQC	9.551
Adrenal	GTEX-1LNCM-0826	-DHXL6	2.174
Adrenal	GTEX-1LVAN-0826	-CNNPG	4.849
Adrenal	GTEX-1M5QR-1726	-EV7AU	2.272
Adrenal	GTEX-1NUQO-0626	-E6CQT	6.681
Adrenal	GTEX-1PIIG-1426	-EXOIS	2.366
Adrenal	GTEX-1PPH8-0826	-DTX9T	4.354
Adrenal	GTEX-1PWST-2126	-DPRZ5	0.4667
Adrenal	GTEX-1QMI2-1926	-EAZ4B	1.808
Adrenal	GTEX-1QP29-0326	-E6CQ4	7.868
Adrenal	GTEX-1QP2A-2626	-EAZ3L	3.433
Adrenal	GTEX-1QPFJ-2526	-EXOJX	1.48
Adrenal	GTEX-1R7EV-1726	-E6CR8	3.386
Adrenal	GTEX-1RAZQ-0226	-EV7BK	5.36
Adrenal	GTEX-1RQEC-1926	-DTX7M	3.007
Adrenal	GTEX-1S82P-1126	-EV79M	6.366
Adrenal	GTEX-NFK9-1726	-3TW8P	3.46
Adrenal	GTEX-O5YT-1326	-3MJGR	12.03
Adrenal	GTEX-O5YV-1126	-3LK73	2.908
Adrenal	GTEX-OHPK-1326	-3MJGN	4.717
Adrenal	GTEX-OHPL-1326	-3MJGG	7.093
Adrenal	GTEX-OIZF-1326	-3MJGU	6.464
Adrenal	GTEX-OIZH-1326	-3NB1H	7.933
Adrenal	GTEX-OXRK-0126	-3NB1E	6.115
Adrenal	GTEX-P4QS-1326	-3NMCD	4.785
Adrenal	GTEX-P4QT-1326	-3NMD3	2.904
Adrenal	GTEX-PLZ5-0326	-3P614	4.635
Adrenal	GTEX-PLZ6-0226	-3P61I	6.625
Adrenal	GTEX-PW2O-0226	-48TC7	4.804
Adrenal	GTEX-PWCY-0226	-48TD8	5.212
Adrenal	GTEX-PX3G-1326	-48U18	12.33
Adrenal	GTEX-Q2AH-0126	-48U2B	4.328
Adrenal	GTEX-Q2AI-0226	-48U1D	5.324
Adrenal	GTEX-Q734-0126	-48U1E	5.513
Adrenal	GTEX-QCQG-0126	-48U27	4.639
Adrenal	GTEX-QDVJ-1126	-48U1U	7.28
Adrenal	GTEX-QDVN-0426	-48TZ6	5.555
Adrenal	GTEX-QEG5-1826	-CE6QW	5.342
Adrenal	GTEX-QLQ7-0126	-CL55R	3.311
Adrenal	GTEX-QLQW-0226	-447BJ	5.537
Adrenal	GTEX-QMRM-0126	-CJI1R	8.664
Adrenal	GTEX-QXCU-1326	-48FE2	0.3335
Adrenal	GTEX-R53T-0226	-48FEH	11.27
Adrenal	GTEX-R55C-0226	-48FEO	11.77
Adrenal	GTEX-R55E-1826	-EXOHD	2.788
Adrenal	GTEX-R55G-0126	-48FDS	6.753
Adrenal	GTEX-REY6-1726	-48FDL	1.475
Adrenal	GTEX-RM2N-0126	-48FDD	7.37
Adrenal	GTEX-RNOR-1626	-EZ6MM	3.956
Adrenal	GTEX-RUSQ-0226	-47JWT	3.741
Adrenal	GTEX-RWSA-1726	-47JX7	0.2082
Adrenal	GTEX-S32W-0126	-4AD61	6.4
Adrenal	GTEX-S33H-1326	-4AD6A	3.664
Adrenal	GTEX-S341-0126	-4AD64	4.319
Adrenal	GTEX-S3XE-0126	-4AD4R	4.983
Adrenal	GTEX-S4Q7-0226	-4AD5O	8.533
Adrenal	GTEX-S4Z8-0126	-4GICC	5.306
Adrenal	GTEX-SUCS-0526	-4DM56	5.411
Adrenal	GTEX-T6MO-0126	-4DM6X	4.877
Adrenal	GTEX-TKQ2-0226	-4DM6V	6.045
Adrenal	GTEX-TMMY-0126	-4DXTP	4.93
Adrenal	GTEX-U3ZM-0226	-4DXTA	7.046
Adrenal	GTEX-U3ZN-0826	-4DXSZ	5.698
Adrenal	GTEX-U4B1-0126	-4DXSN	6.859
Adrenal	GTEX-UJMC-0226	-4IHLH	2.356
Adrenal	GTEX-V1D1-0226	-4JBHG	2.151
Adrenal	GTEX-V955-0126	-4JBH5	7.177
Adrenal	GTEX-VJYA-0526	-4KL1R	3.076
Adrenal	GTEX-VUSG-1526	-4KKZH	5.489
Adrenal	GTEX-W5WG-1126	-4LMK4	6.046
Adrenal	GTEX-WFG8-0126	-4LVMH	6.269
Adrenal	GTEX-WHPG-1526	-4M1ZK	5.495
Adrenal	GTEX-WQUQ-0126	-4OOSS	3.517
Adrenal	GTEX-WY7C-0326	-4OND5	6.784
Adrenal	GTEX-WYVS-0226	-4ONDK	3.598
Adrenal	GTEX-X4EO-1726	-4QARN	1.196
Adrenal	GTEX-X4LF-0126	-4QAS7	4.128
Adrenal	GTEX-XMK1-0226	-4B65D	6.164
Adrenal	GTEX-XQ3S-1726	-4BOOD	3.722
Adrenal	GTEX-XUZC-0226	-4BOO7	3.832
Adrenal	GTEX-XV7Q-0226	-4BRVL	4.313
Adrenal	GTEX-XYKS-0926	-4BRVG	5.308
Adrenal	GTEX-Y114-0526	-4TT8V	2.224
Adrenal	GTEX-Y3IK-0226	-51MRJ	3.922
Adrenal	GTEX-Y5LM-0126	-4VBRL	5.298
Adrenal	GTEX-Y5V5-1326	-4V6G9	1.474
Adrenal	GTEX-Y5V6-1926	-5IFIL	4.915
Adrenal	GTEX-Y9LG-0126	-5Q59W	6.667
Adrenal	GTEX-YB5E-0226	-5IFHI	5.405
Adrenal	GTEX-YF7O-0126	-5IFIR	6.702
Adrenal	GTEX-YFCO-0126	-4W1YT	4.398
Adrenal	GTEX-ZA64-0226	-5HL9C	6.251
Adrenal	GTEX-ZDTT-0126	-4WKHA	4.823
Adrenal	GTEX-ZEX8-0626	-DO118	4.912
Adrenal	GTEX-ZF2S-0126	-4WKFO	6.317
Adrenal	GTEX-ZLFU-0826	-4WWBP	2.932
Adrenal	GTEX-ZLV1-0226	-4WWC1	4.449
Adrenal	GTEX-ZLWG-0126	-4WWC5	4.255
Adrenal	GTEX-ZP4G-0126	-4YCE3	3.845
Adrenal	GTEX-ZPCL-0826	-DNZZ7	6.557
Adrenal	GTEX-ZT9W-0126	-4YCFD	4.48
Adrenal	GTEX-ZT9X-0126	-4YCFC	7.655
Adrenal	GTEX-ZTSS-0326	-5987M	4.839
Adrenal	GTEX-ZUA1-1926	-5E45E	2.166
Adrenal	GTEX-ZVP2-0126	-5NQ7D	4.208
Adrenal	GTEX-ZVT2-0826	-5GIEO	5.779
Adrenal	GTEX-ZY6K-0126	-5SIAM	5.052
Adrenal	GTEX-ZYFG-0926	-5BC5U	3.942
Adrenal	GTEX-ZYVF-1626	-5N9EH	0.1488
Adrenal	GTEX-ZZPU-1226	-5N9CK	6.612
Artery	GTEX-1117F-0526	-5EGHJ	4.893
Artery	GTEX-1117F-0626	-5N9CS	7.047
Artery	GTEX-111FC-0426	-5N9CV	9.019
Artery	GTEX-111YS-0526	-5GZXJ	6.358
Artery	GTEX-111YS-2226	-5987P	4.869
Artery	GTEX-1122O-0426	-5H12G	4.598
Artery	GTEX-1122O-1126	-5NQ8X	4.759
Artery	GTEX-1122O-2326	-9YFL9	4.836
Artery	GTEX-1128S-0326	-5GZZF	8.947
Artery	GTEX-1128S-2526	-5H11N	5.922
Artery	GTEX-113IC-0426	-5HL5O	6.713
Artery	GTEX-117XS-0426	-5GZZN	9.976
Artery	GTEX-117YW-0226	-5N9CM	6.126
Artery	GTEX-117YW-2726	-5GZZT	6.087
Artery	GTEX-117YX-1726	-5GZZS	6.888
Artery	GTEX-117YX-2626	-5EQ53	6.582
Artery	GTEX-11DXW-0526	-5H127	13.64
Artery	GTEX-11DXX-0426	-5EQ5F	6.826
Artery	GTEX-11DXX-0826	-5GZZP	7.767
Artery	GTEX-11DXX-2626	-5Q5A3	10.45
Artery	GTEX-11DXY-1126	-5987W	4.982
Artery	GTEX-11DXZ-0426	-5987Y	12.16
Artery	GTEX-11DXZ-0526	-5GU7J	8.674
Artery	GTEX-11DXZ-2626	-59882	10.35
Artery	GTEX-11DYG-0926	-5EGGW	7.248
Artery	GTEX-11DYG-1226	-5N9DC	6.394
Artery	GTEX-11EI6-0526	-5985S	3.056
Artery	GTEX-11EM3-0226	-5985Y	6.217
Artery	GTEX-11EM3-0526	-5H12N	3.252
Artery	GTEX-11EM3-2226	-5H11Y	5.949
Artery	GTEX-11EMC-0926	-59863	4.839
Artery	GTEX-11EMC-3026	-5EQ4R	5.628
Artery	GTEX-11EQ8-0426	-5N9DP	8.163
Artery	GTEX-11EQ9-2226	-5987H	11.7
Artery	GTEX-11GS4-0326	-5N9F7	6.776
Artery	GTEX-11GS4-0626	-5A5LC	4.99
Artery	GTEX-11GS4-2926	-5A5LF	7.997
Artery	GTEX-11GSP-1126	-5A5LM	7.884
Artery	GTEX-11GSP-2926	-5N9C2	4.565
Artery	GTEX-11I78-0726	-5A5M1	6.991
Artery	GTEX-11I78-1026	-5HL74	6.756
Artery	GTEX-11I78-2326	-5Q5AH	14.31
Artery	GTEX-11LCK-0726	-5PNYC	6.51
Artery	GTEX-11LCK-1426	-5HL5R	5.919
Artery	GTEX-11NUK-0526	-5A5L5	8.591
Artery	GTEX-11NUK-0726	-5A5ME	10.61
Artery	GTEX-11NV4-0526	-5N9BF	10.66
Artery	GTEX-11O72-0426	-5BC5B	4.068
Artery	GTEX-11OC5-0426	-5Q5AR	7.527
Artery	GTEX-11ONC-0926	-5BC5E	8.979
Artery	GTEX-11ONC-1126	-5GU6G	6.888
Artery	GTEX-11ONC-2726	-5N9DZ	6.127
Artery	GTEX-11P7K-2326	-5EGKZ	6.452
Artery	GTEX-11P81-0326	-5HL6B	14.29
Artery	GTEX-11P81-2726	-59876	10.01
Artery	GTEX-11P82-0126	-5HL72	11.3
Artery	GTEX-11TT1-1226	-5Q5AV	5.641
Artery	GTEX-11TT1-1526	-5EQKU	3.292
Artery	GTEX-11TT1-2726	-5LU8L	6.485
Artery	GTEX-11TUW-0926	-5EQMW	9.09
Artery	GTEX-11TUW-2926	-5BC59	9.448
Artery	GTEX-11UD2-0526	-5GU69	7.31
Artery	GTEX-11UD2-0826	-5EQKS	9.624
Artery	GTEX-11UD2-1126	-5EQM6	8.297
Artery	GTEX-11VI4-2026	-5CVLJ	8.421
Artery	GTEX-11WQC-2726	-5CVLG	13.05
Artery	GTEX-11WQK-0326	-5EQL1	9.599
Artery	GTEX-11XUK-2426	-5GU72	12.7
Artery	GTEX-11ZTS-0326	-5EQKP	6.027
Artery	GTEX-11ZTS-0826	-5EQ49	9.35
Artery	GTEX-11ZTS-1026	-5LU8O	9.412
Artery	GTEX-11ZTT-0426	-5EQLK	5.288
Artery	GTEX-11ZUS-0526	-59884	5.23
Artery	GTEX-11ZUS-1326	-5FQUC	8.831
Artery	GTEX-11ZVC-0326	-5CVLC	8.266
Artery	GTEX-11ZVC-2926	-5986H	8.911
Artery	GTEX-1211K-0326	-5FQT1	6.617
Artery	GTEX-1211K-2426	-59HL8	7.547
Artery	GTEX-12126-0726	-5FQTX	8.276
Artery	GTEX-1212Z-0826	-5EQ51	8.256
Artery	GTEX-1212Z-2826	-59HJ5	11.48
Artery	GTEX-12584-0426	-5FQTT	11.53
Artery	GTEX-12696-0426	-5EGL5	8.117
Artery	GTEX-12696-0526	-5EQ3Z	7.953
Artery	GTEX-12696-2726	-5FQUL	4.464
Artery	GTEX-1269C-2826	-5EQ5O	7.701
Artery	GTEX-12BJ1-2726	-5HL9M	12.18
Artery	GTEX-12C56-0226	-5N9FB	9.54
Artery	GTEX-12C56-2026	-5FQSI	4.948
Artery	GTEX-12KS4-0626	-5PNY4	18.71
Artery	GTEX-12WSC-0526	-5BC5X	9.214
Artery	GTEX-12WSC-0926	-5EQ63	12.4
Artery	GTEX-12WSD-1026	-5EQ42	11.57
Artery	GTEX-12WSD-1326	-5GCNU	14.14
Artery	GTEX-12WSE-1126	-7DUEH	7.538
Artery	GTEX-12WSH-2826	-5GCP5	5.423
Artery	GTEX-12WSK-0426	-5GCNS	10.06
Artery	GTEX-12WSK-0726	-5LZUV	12.67
Artery	GTEX-12WSK-2726	-5CVND	13.48
Artery	GTEX-12WSL-0926	-5N9EK	6.936
Artery	GTEX-12WSL-2626	-5GCNV	9.907
Artery	GTEX-12WSM-0526	-5GCO8	3.383
Artery	GTEX-12WSN-0326	-5GCP6	6.665
Artery	GTEX-12WSN-2726	-5LZUK	4.975
Artery	GTEX-12ZZW-0426	-5GCO9	6.764
Artery	GTEX-12ZZX-0526	-5DUW6	16.68
Artery	GTEX-12ZZX-0626	-5EQ46	9.594
Artery	GTEX-12ZZX-1026	-5LZUW	15.86
Artery	GTEX-12ZZY-0526	-5EQ5H	5.064
Artery	GTEX-12ZZY-1326	-5GCNW	11.78
Artery	GTEX-13111-0526	-5LZVF	8.4
Artery	GTEX-13111-2126	-5LZU2	8.732
Artery	GTEX-13113-0526	-5GCN2	9.976
Artery	GTEX-13113-2126	-5EQ4U	7.564
Artery	GTEX-1313W-1026	-5EQ5I	8.459
Artery	GTEX-1314G-1926	-5BC6F	17.84
Artery	GTEX-131XE-2626	-5PNYY	12
Artery	GTEX-131XF-0526	-5HL87	6.513
Artery	GTEX-131XF-0626	-5GIDS	10.1
Artery	GTEX-131XF-2526	-5EQ68	8.128
Artery	GTEX-131XG-0826	-5LZVS	4.508
Artery	GTEX-131XG-2226	-5DUXS	10.96
Artery	GTEX-131XH-2426	-5PNZ6	5.829
Artery	GTEX-131XW-0226	-5IJCA	5.296
Artery	GTEX-131XW-2226	-5PNY1	6.921
Artery	GTEX-131YS-0426	-5EQ4J	7.948
Artery	GTEX-131YS-1126	-5N9FQ	15.26
Artery	GTEX-131YS-1226	-5K7VE	7.533
Artery	GTEX-132AR-0726	-5EQ6J	6.374
Artery	GTEX-132AR-1326	-5K7YC	6.766
Artery	GTEX-132AR-2126	-5K7XG	9.565
Artery	GTEX-132NY-0626	-5L3D9	11.34
Artery	GTEX-132Q8-0526	-5IJBQ	8.37
Artery	GTEX-132QS-0626	-62LFM	7.992
Artery	GTEX-1339X-0526	-5KLYW	6.774
Artery	GTEX-1339X-2626	-5K7YX	5.904
Artery	GTEX-133LE-0226	-5PNY3	11.17
Artery	GTEX-133LE-2226	-5IFGU	8.072
Artery	GTEX-1399R-0626	-5K7UZ	12.11
Artery	GTEX-1399R-1826	-5J2M9	13.05
Artery	GTEX-1399R-2326	-5PNYT	11.37
Artery	GTEX-1399S-0926	-5PNVQ	3.629
Artery	GTEX-1399S-2626	-5L3DU	5.262
Artery	GTEX-1399T-0526	-5J1NC	14.02
Artery	GTEX-1399T-2626	-5L3E4	13.43
Artery	GTEX-1399U-0426	-5K7UU	8.743
Artery	GTEX-1399U-0626	-5J1NZ	4.792
Artery	GTEX-1399U-2726	-9YFKV	9.771
Artery	GTEX-139D8-1226	-5L3ED	19.77
Artery	GTEX-139T6-1826	-5KM2E	9.461
Artery	GTEX-139T8-0426	-5K7VC	11.78
Artery	GTEX-139TS-0226	-5K7W5	6.831
Artery	GTEX-139TT-0526	-5J1NN	8.695
Artery	GTEX-139TU-1126	-5J1NY	5.062
Artery	GTEX-139UW-0426	-5K7V4	6.222
Artery	GTEX-139UW-2526	-62LFO	8.821
Artery	GTEX-139YR-0626	-5IJBT	14.37
Artery	GTEX-139YR-0726	-62LFN	7.064
Artery	GTEX-139YR-2726	-5K7VV	14.52
Artery	GTEX-13CF3-0526	-5IJBV	6.55
Artery	GTEX-13CF3-0626	-5J1NO	8.896
Artery	GTEX-13CF3-2226	-5J2MX	5.426
Artery	GTEX-13D11-1426	-5K7Y9	14.78
Artery	GTEX-13D11-2726	-5K7V7	11.21
Artery	GTEX-13FH7-0326	-5J1MR	3.837
Artery	GTEX-13FH7-0426	-5KM4M	3.067
Artery	GTEX-13FH7-2326	-5KM1E	3.005
Artery	GTEX-13FHO-1626	-5IJGB	14.08
Artery	GTEX-13FHP-0426	-5J1O5	7.325
Artery	GTEX-13FHP-1126	-5IJDO	2.158
Artery	GTEX-13FLV-1426	-5J1N4	7.759
Artery	GTEX-13FTW-0726	-9WG72	8.397
Artery	GTEX-13FTW-0926	-5J2NJ	5.888
Artery	GTEX-13FTW-2226	-5J1OH	6.238
Artery	GTEX-13FTX-0226	-5K7TX	13.58
Artery	GTEX-13FTX-2226	-5J1OP	7.034
Artery	GTEX-13FTY-0426	-5IJC2	9.377
Artery	GTEX-13FTZ-0126	-5K7V3	7.576
Artery	GTEX-13FXS-1126	-5IJBB	7.145
Artery	GTEX-13G51-2926	-5IJDL	14.01
Artery	GTEX-13JUV-2426	-5J1NS	9.921
Artery	GTEX-13JVG-0426	-5MR59	6.803
Artery	GTEX-13N11-0626	-5J1OL	11.63
Artery	GTEX-13N11-2926	-5K7VD	11.78
Artery	GTEX-13N1W-0326	-5IJDJ	7.677
Artery	GTEX-13N2G-0526	-5MR5L	8.141
Artery	GTEX-13NYB-0426	-5IJDD	12.3
Artery	GTEX-13NYB-2926	-5K7VH	7.753
Artery	GTEX-13NYC-0826	-5N9FP	5.012
Artery	GTEX-13NYS-0526	-5J1OF	13.87
Artery	GTEX-13NZ8-1626	-5IJBC	9.218
Artery	GTEX-13NZ9-0826	-5J1NI	12.06
Artery	GTEX-13NZ9-1226	-5MR3J	8.079
Artery	GTEX-13NZA-1126	-5MR4K	6.803
Artery	GTEX-13NZB-2226	-5MR5B	16.01
Artery	GTEX-13O1R-1026	-5KM2L	3.127
Artery	GTEX-13O21-0426	-5K7VR	7.432
Artery	GTEX-13O21-2526	-5J1OZ	9.338
Artery	GTEX-13O21-2926	-5J1OU	6.47
Artery	GTEX-13O3O-0426	-5KM2Y	7.905
Artery	GTEX-13O3O-1126	-5KM4Q	9.528
Artery	GTEX-13O3P-0526	-5K7UT	8.035
Artery	GTEX-13O3P-1126	-5L3FG	7.841
Artery	GTEX-13O3Q-2526	-5IJC4	13.2
Artery	GTEX-13O61-0326	-5KM2O	6.258
Artery	GTEX-13O61-0626	-5L3D1	7.634
Artery	GTEX-13O61-2526	-5J1O8	8.487
Artery	GTEX-13OVG-0726	-5IJBY	3.526
Artery	GTEX-13OVG-0826	-5L3D8	9.487
Artery	GTEX-13OVG-2326	-5J1OV	4.874
Artery	GTEX-13OVH-0426	-5K7UC	4.785
Artery	GTEX-13OVI-0626	-5IJCN	6.144
Artery	GTEX-13OVK-1726	-7KUE9	13.59
Artery	GTEX-13OVL-1326	-5IJCZ	9.154
Artery	GTEX-13OW5-0826	-5J1NE	14.76
Artery	GTEX-13OW6-0326	-5L3H9	7.28
Artery	GTEX-13OW6-1526	-5L3HX	7.615
Artery	GTEX-13OW7-0626	-5K7UD	8.608
Artery	GTEX-13OW8-1626	-5L3HW	6.98
Artery	GTEX-13OW8-1826	-5L3H1	10.97
Artery	GTEX-13OW8-2026	-9WYSA	6.474
Artery	GTEX-13PL6-0526	-5L3G6	6.408
Artery	GTEX-13PL7-1826	-5IJDV	8.23
Artery	GTEX-13PL7-2126	-5L3HZ	11.39
Artery	GTEX-13PLJ-0526	-5K7VW	8.984
Artery	GTEX-13PVQ-0526	-5LU8Q	9.796
Artery	GTEX-13PVQ-1426	-5J1O4	7.296
Artery	GTEX-13PVR-0826	-5S2PV	4.835
Artery	GTEX-13PVR-1126	-5S2NX	6.145
Artery	GTEX-13PVR-2726	-5SI6H	6.079
Artery	GTEX-13QBU-0126	-5LU3V	5.12
Artery	GTEX-13QBU-0326	-5LU3F	8.799
Artery	GTEX-13QBU-2226	-5K7WI	7.471
Artery	GTEX-13QIC-1626	-5K7TZ	4.347
Artery	GTEX-13QJ3-0626	-5SI6G	17.77
Artery	GTEX-13QJC-0626	-5S2O9	4.198
Artery	GTEX-13QJC-2526	-7DHKJ	8.053
Artery	GTEX-13RTJ-0626	-5S2NB	5.576
Artery	GTEX-13RTJ-2626	-7DHKR	4.829
Artery	GTEX-13RTK-0126	-5RQHQ	9.458
Artery	GTEX-13RTK-1826	-5S2P3	10.76
Artery	GTEX-13RTL-0426	-7LG66	8.708
Artery	GTEX-13S7M-2226	-5S2WB	4.338
Artery	GTEX-13S86-0526	-5QGPZ	10.5
Artery	GTEX-13S86-2526	-5S2V5	14.43
Artery	GTEX-13U4I-0426	-5LU4W	6.409
Artery	GTEX-13U4I-0926	-5LU5A	7.141
Artery	GTEX-13U4I-1026	-5LU3G	9.979
Artery	GTEX-13VXT-0526	-5SI9O	11.68
Artery	GTEX-13VXT-0826	-5SIAP	4.344
Artery	GTEX-13VXT-1026	-5LU37	2.431
Artery	GTEX-13VXU-0526	-5K7V1	6.414
Artery	GTEX-13VXU-1926	-5LU5J	8.453
Artery	GTEX-13W3W-0226	-731ET	12.77
Artery	GTEX-13W3W-0626	-5LU45	5.881
Artery	GTEX-13W3W-2826	-731E5	8.442
Artery	GTEX-13W46-0626	-5LU3N	16.65
Artery	GTEX-13W46-1826	-5K7VA	19.23
Artery	GTEX-13X6H-0126	-5QGOS	3.629
Artery	GTEX-13X6H-2526	-5QGOT	4.304
Artery	GTEX-13X6I-0926	-5LUAB	9.968
Artery	GTEX-13X6J-1326	-5QGOV	5.989
Artery	GTEX-13X6K-0526	-5LU51	13.1
Artery	GTEX-13X6K-1926	-5LU4O	16.01
Artery	GTEX-13YAN-1526	-5LU3E	12.3
Artery	GTEX-1445S-1126	-5QGOW	2.954
Artery	GTEX-144GL-0526	-5LU41	14.41
Artery	GTEX-144GM-2226	-5O9B5	4.415
Artery	GTEX-144GN-0326	-5O9AD	11.97
Artery	GTEX-145LS-0426	-5LU8M	6.962
Artery	GTEX-145LU-0826	-79OJJ	11.46
Artery	GTEX-145ME-2226	-5S2VY	7.904
Artery	GTEX-145MF-0426	-5LU9T	14.59
Artery	GTEX-145MH-1026	-5Q5CI	5.387
Artery	GTEX-145MH-1526	-5LUAU	7.442
Artery	GTEX-145MN-2326	-5SIB7	11.18
Artery	GTEX-145MO-0626	-5NQAW	6.662
Artery	GTEX-145MO-1226	-5QGPC	7.654
Artery	GTEX-146FH-0426	-5QGPS	3.747
Artery	GTEX-146FH-0926	-5SI96	6.587
Artery	GTEX-146FH-1326	-5NQBI	13.28
Artery	GTEX-146FQ-0526	-5LU9I	15.11
Artery	GTEX-146FQ-0826	-5LUAJ	17.55
Artery	GTEX-146FR-1026	-5NQ9T	7.549
Artery	GTEX-146FR-1626	-5Q5DS	10.12
Artery	GTEX-14753-0226	-5Q5CH	7.249
Artery	GTEX-147F3-0426	-5SI8V	8.111
Artery	GTEX-147F4-0126	-5QGPV	10.31
Artery	GTEX-147F4-1026	-5Q5F9	12.15
Artery	GTEX-147F4-1326	-5LU9V	10.31
Artery	GTEX-147JS-0726	-5S2UL	8.462
Artery	GTEX-148VJ-0426	-5S2V8	6.579
Artery	GTEX-1497J-1026	-5NQAV	11.82
Artery	GTEX-14A5H-0226	-5S2VK	2.906
Artery	GTEX-14A5I-1326	-5SIAQ	4.542
Artery	GTEX-14A6H-2726	-5QGPL	4.266
Artery	GTEX-14AS3-0526	-5QGQQ	15.14
Artery	GTEX-14AS3-2326	-5S2NZ	10.19
Artery	GTEX-14ASI-1126	-5QGPN	7.373
Artery	GTEX-14B4R-0226	-5TDDO	7.958
Artery	GTEX-14B4R-2026	-5QGQL	4.292
Artery	GTEX-14BIM-2626	-5S2OF	14.18
Artery	GTEX-14BIN-0926	-5S2OZ	12.23
Artery	GTEX-14BMU-0326	-793DO	8.625
Artery	GTEX-14BMU-2426	-5RQIJ	9.927
Artery	GTEX-14BMV-0526	-5S2NE	10.29
Artery	GTEX-14BMV-0926	-7DHKM	3.958
Artery	GTEX-14BMV-1226	-5TDDY	13.9
Artery	GTEX-14C38-1226	-5S2UK	4.279
Artery	GTEX-14C39-0126	-6128R	4.368
Artery	GTEX-14C39-2626	-5S2QD	7.156
Artery	GTEX-14C5O-0526	-62LEI	14.61
Artery	GTEX-14C5O-1426	-5RQI8	9.375
Artery	GTEX-14C5O-1526	-7DHKT	13.17
Artery	GTEX-14DAQ-0526	-793AY	11.2
Artery	GTEX-14DAQ-1326	-5RQIM	12.06
Artery	GTEX-14DAR-2126	-5RQID	8.488
Artery	GTEX-14E1K-0726	-62LDU	10.11
Artery	GTEX-14E1K-0926	-5S2U4	4.067
Artery	GTEX-14E1K-2526	-5ZZWA	6.169
Artery	GTEX-14E6C-0626	-664NA	9.742
Artery	GTEX-14E6C-1126	-62LDM	8.774
Artery	GTEX-14E6E-2126	-664N6	13
Artery	GTEX-14E7W-0526	-5S2W8	9.699
Artery	GTEX-14E7W-1026	-62LEK	5.39
Artery	GTEX-14E7W-1426	-6LLJ2	9.304
Artery	GTEX-14H4A-0526	-62LEU	2.419
Artery	GTEX-14ICL-0326	-5S2OS	5.141
Artery	GTEX-14ICL-1826	-5RQIY	6.113
Artery	GTEX-14JFF-0526	-62LFL	3.77
Artery	GTEX-14JG1-0326	-62LDO	8.493
Artery	GTEX-14JG6-2026	-6EU2E	10.56
Artery	GTEX-14PHY-2726	-62LE2	5.68
Artery	GTEX-14PII-0526	-6EU2A	13.34
Artery	GTEX-14PJ2-1226	-62LFE	19.84
Artery	GTEX-14PJ3-0226	-6EU37	7.801
Artery	GTEX-14PJ3-2126	-5ZZVL	8.618
Artery	GTEX-14PJ4-0826	-6LLH5	6.093
Artery	GTEX-14PJ4-1026	-6AJ97	6.234
Artery	GTEX-14PJ5-1926	-6LLIM	5.623
Artery	GTEX-14PJ6-0526	-6LLIU	4.553
Artery	GTEX-14PJ6-1226	-6LLHJ	10.25
Artery	GTEX-14PJM-0626	-686ZN	6.783
Artery	GTEX-14PJM-1026	-6ETZT	7.604
Artery	GTEX-14PJM-1426	-62LF3	7.995
Artery	GTEX-14PJN-2226	-6872I	8.067
Artery	GTEX-14PK6-0626	-6AJ9P	9.277
Artery	GTEX-14PK6-2326	-69LOG	8.155
Artery	GTEX-14PKU-2226	-7LG5T	8.383
Artery	GTEX-14PN3-0426	-6LLIY	4.237
Artery	GTEX-14PN4-0426	-6AJ9N	9.924
Artery	GTEX-14XAO-1026	-6LLJ7	3.83
Artery	GTEX-15CHC-0526	-6EU23	7.951
Artery	GTEX-15CHC-0626	-686YV	8.338
Artery	GTEX-15CHQ-0626	-6AJ9E	8.66
Artery	GTEX-15CHQ-1626	-6LLJR	6.791
Artery	GTEX-15CHR-0126	-7SB7X	15.31
Artery	GTEX-15CHR-0526	-79OLJ	12.86
Artery	GTEX-15D1Q-1226	-686Z1	15.02
Artery	GTEX-15D79-0426	-6AJAW	8.026
Artery	GTEX-15DDE-0426	-6M48M	7.304
Artery	GTEX-15DDE-1226	-6PAN8	5.478
Artery	GTEX-15DDE-1326	-6LLJM	5.424
Artery	GTEX-15DYW-1226	-6PALV	11.09
Artery	GTEX-15DZA-1226	-7KFS1	8.027
Artery	GTEX-15DZA-2226	-7KUMY	12.86
Artery	GTEX-15EOM-0526	-7KUFY	6.505
Artery	GTEX-15ER7-1426	-6PAMA	8.851
Artery	GTEX-15ER7-2026	-793B8	13.46
Artery	GTEX-15ETS-0726	-6LPKL	7.999
Artery	GTEX-15ETS-2426	-6PANJ	14.73
Artery	GTEX-15EU6-0726	-7KUFU	7.405
Artery	GTEX-15F5U-0226	-6PANK	8.586
Artery	GTEX-15FZZ-0426	-6PANM	10.46
Artery	GTEX-15G19-1026	-6PALM	3.846
Artery	GTEX-15G1A-2326	-6PAMJ	4.273
Artery	GTEX-15RIF-0126	-7KUG3	10.82
Artery	GTEX-15RJ7-0526	-6PANP	8.826
Artery	GTEX-15RJE-0526	-6PAMN	10.24
Artery	GTEX-15RJE-2426	-6PAM9	16.93
Artery	GTEX-15SDE-2526	-6PAL5	11.03
Artery	GTEX-15SHU-1026	-6PAL7	4.437
Artery	GTEX-15SHU-1226	-718BY	8.209
Artery	GTEX-15SHV-0726	-6PAMO	5.838
Artery	GTEX-15SHV-0826	-7KUFA	5.985
Artery	GTEX-15SHW-0626	-6PALH	10.19
Artery	GTEX-15SKB-0526	-6PAMP	4.284
Artery	GTEX-15UF6-0226	-7KUF6	8.92
Artery	GTEX-15UF6-0726	-6PALI	7.341
Artery	GTEX-15UF7-2326	-7KUFO	8.798
Artery	GTEX-16AAH-1926	-7LG4C	14.59
Artery	GTEX-16GPK-0426	-6PAMW	7.078
Artery	GTEX-16MT8-0126	-7DHLD	13.52
Artery	GTEX-16MTA-1926	-7KUG1	13.57
Artery	GTEX-16NGA-2126	-7PC1G	4.774
Artery	GTEX-16NPV-0526	-79OKI	13.26
Artery	GTEX-16XZY-2426	-7EPGQ	5.409
Artery	GTEX-16XZZ-0426	-793BW	8.325
Artery	GTEX-16XZZ-1426	-7KUE3	6.907
Artery	GTEX-16YQH-0626	-7938I	9.779
Artery	GTEX-16YQH-0826	-7938J	7.425
Artery	GTEX-178AV-1926	-7KUL9	8.121
Artery	GTEX-17EUY-0326	-7DUEY	14.71
Artery	GTEX-17EVP-0926	-7IGOY	8.834
Artery	GTEX-17EVP-1226	-793BF	2.348
Artery	GTEX-17EVQ-1126	-7LG58	9.424
Artery	GTEX-17EVQ-1626	-79ONH	9.774
Artery	GTEX-17F96-1126	-7EWDF	10.15
Artery	GTEX-17F97-0226	-7LG6Q	4.157
Artery	GTEX-17F98-0726	-793BJ	10.27
Artery	GTEX-17F98-0926	-7DHLT	6.997
Artery	GTEX-17F9E-0526	-7DUFD	13.48
Artery	GTEX-17F9E-1226	-7EWDG	8.454
Artery	GTEX-17F9Y-0826	-7LG52	12.19
Artery	GTEX-17F9Y-1426	-7IGOO	3.081
Artery	GTEX-17GQL-0426	-7LG5V	3.014
Artery	GTEX-17GQL-2226	-718BB	10.88
Artery	GTEX-17GQL-2326	-731EJ	6.285
Artery	GTEX-17HGU-0526	-793BX	10.62
Artery	GTEX-17HHE-2326	-793C5	10.13
Artery	GTEX-17HHY-0526	-793BZ	11.61
Artery	GTEX-17HII-0626	-7LT9H	9.03
Artery	GTEX-17HII-1126	-7IGOP	6.977
Artery	GTEX-17HII-1826	-7DUFQ	7.703
Artery	GTEX-17KNJ-0526	-7PC3Y	11.48
Artery	GTEX-17KNJ-2526	-7DUFR	13.19
Artery	GTEX-17MF6-0526	-7LG4H	13.6
Artery	GTEX-17MF6-1026	-7EWE1	5.163
Artery	GTEX-17MFQ-2126	-7LG5W	12.83
Artery	GTEX-183FY-0526	-7939Z	15.08
Artery	GTEX-18465-0426	-7LTAE	12.17
Artery	GTEX-18465-1026	-7PC23	9.778
Artery	GTEX-18A66-0526	-7LG5O	10.35
Artery	GTEX-18A66-1026	-731B8	11.57
Artery	GTEX-18A66-1326	-7LG4M	11.95
Artery	GTEX-18A67-0526	-7LT9X	7.953
Artery	GTEX-18A67-0926	-7LG5Y	12.54
Artery	GTEX-18A67-1426	-718BC	11.57
Artery	GTEX-18A6Q-0526	-7LG4O	9.044
Artery	GTEX-18A6Q-1426	-7LG63	8.435
Artery	GTEX-18A7A-0526	-718BI	10.04
Artery	GTEX-18A7A-1126	-7LT8O	11.4
Artery	GTEX-18A7A-1426	-731AP	14.08
Artery	GTEX-18A7B-0526	-7LG68	4.702
Artery	GTEX-18A7B-0926	-7189F	4.344
Artery	GTEX-18D9A-1626	-7LG5Q	6.893
Artery	GTEX-18D9B-0326	-731B2	3.45
Artery	GTEX-18D9U-0926	-731AZ	7.382
Artery	GTEX-18D9U-1326	-731BI	10.19
Artery	GTEX-18QFQ-0526	-718AV	8.283
Artery	GTEX-1A32A-0426	-7939P	10.7
Artery	GTEX-1A32A-1726	-731BW	5.654
Artery	GTEX-1A3MV-0426	-73KXL	9.273
Artery	GTEX-1A3MV-2226	-731CP	3.988
Artery	GTEX-1A3MW-0426	-731AI	9.24
Artery	GTEX-1A3MX-0426	-72D5W	8.487
Artery	GTEX-1A8G6-0226	-79ONQ	7.141
Artery	GTEX-1A8G6-1726	-73KXZ	7.087
Artery	GTEX-1A8G7-0426	-731B5	3.888
Artery	GTEX-1A8G7-2726	-7MGWV	1.976
Artery	GTEX-1AMEY-0726	-72D5X	7.023
Artery	GTEX-1AMFI-0426	-731C7	7.571
Artery	GTEX-1AMFI-2426	-73KWO	4.98
Artery	GTEX-1AX8Z-0526	-7939M	8.179
Artery	GTEX-1AX8Z-1226	-7DHM7	7.674
Artery	GTEX-1AX8Z-1426	-7939T	6.314
Artery	GTEX-1AX9I-0926	-73KX8	3.719
Artery	GTEX-1AX9I-1226	-731CJ	8.614
Artery	GTEX-1AX9J-0426	-7MGVQ	3.177
Artery	GTEX-1AX9J-0726	-7PC2E	6.087
Artery	GTEX-1AX9K-0326	-7DHM9	8.15
Artery	GTEX-1AX9K-0726	-73KYR	2.849
Artery	GTEX-1AX9K-2626	-793CO	12.6
Artery	GTEX-1AYCT-0326	-73KVN	7.37
Artery	GTEX-1AYCT-0626	-7EPI5	1.939
Artery	GTEX-1AYCT-2126	-7PC3N	7.263
Artery	GTEX-1AYD5-0626	-7RHHT	5.378
Artery	GTEX-1AYD5-0726	-7SB6Y	12.94
Artery	GTEX-1AYD5-2126	-73KWQ	7.885
Artery	GTEX-1B8KE-0226	-7EWEK	11.47
Artery	GTEX-1B8KE-0426	-7189G	10.32
Artery	GTEX-1B8KE-2326	-7939L	9.626
Artery	GTEX-1B8KZ-2226	-73KYS	6.881
Artery	GTEX-1B8L1-0226	-7PBYE	11.05
Artery	GTEX-1B8L1-2826	-793D2	11.57
Artery	GTEX-1B8SF-0726	-73KYZ	7.11
Artery	GTEX-1B8SG-0526	-73KWP	6.892
Artery	GTEX-1B8SG-0626	-79OL3	8.657
Artery	GTEX-1B8SG-0926	-73KV6	3.424
Artery	GTEX-1B932-0426	-73KX4	12.15
Artery	GTEX-1B932-1226	-7PBYN	13.71
Artery	GTEX-1B933-0326	-7SB71	12.54
Artery	GTEX-1B933-1126	-73KX2	11.07
Artery	GTEX-1B97I-1926	-7DUGC	6.979
Artery	GTEX-1B97J-0526	-793C2	2.432
Artery	GTEX-1B97J-0826	-7SB78	4.493
Artery	GTEX-1B97J-1726	-7MGWP	6.115
Artery	GTEX-1B996-0626	-79OJP	4.415
Artery	GTEX-1BAJH-0226	-7EPHQ	7.279
Artery	GTEX-1BAJH-1126	-7PBYG	9.159
Artery	GTEX-1BAJH-1226	-7SB7A	2.501
Artery	GTEX-1C2JI-0426	-79OOF	7.835
Artery	GTEX-1C2JI-1926	-73KXO	8.864
Artery	GTEX-1C475-2126	-7PBXU	7.523
Artery	GTEX-1C4CL-0126	-7IGN5	14.2
Artery	GTEX-1C4CL-1226	-7DUFT	13.91
Artery	GTEX-1C64N-0526	-7PC32	13.41
Artery	GTEX-1C64O-0526	-793D6	6.239
Artery	GTEX-1C64O-1026	-7PC3L	6.153
Artery	GTEX-1C64O-1126	-7IGMY	4.012
Artery	GTEX-1C6VQ-0726	-7EPI6	8.74
Artery	GTEX-1C6VQ-1326	-7939X	13.54
Artery	GTEX-1C6VR-2826	-7EWEE	7.969
Artery	GTEX-1C6VS-0326	-7MGX5	6.617
Artery	GTEX-1C6WA-0426	-7PC2C	9.142
Artery	GTEX-1C6WA-1126	-7IGP6	1.358
Artery	GTEX-1CAMQ-0426	-7IGPL	5.786
Artery	GTEX-1CAMR-2126	-7PBYX	14.39
Artery	GTEX-1CAMS-0626	-7PBYY	13.15
Artery	GTEX-1CAMS-1026	-7PC2I	6.646
Artery	GTEX-1CAMS-1226	-79393	13.03
Artery	GTEX-1CAV2-2626	-7MGX7	2.791
Artery	GTEX-1CB4E-0426	-7PBY5	7.801
Artery	GTEX-1CB4E-0726	-7EWEY	10.18
Artery	GTEX-1CB4E-2026	-7PC2V	12.08
Artery	GTEX-1CB4F-0726	-793AO	20.47
Artery	GTEX-1CB4G-0526	-7P8SY	13.5
Artery	GTEX-1CB4G-1126	-7PBXW	12.79
Artery	GTEX-1CB4H-0826	-7SB7Z	10.72
Artery	GTEX-1CB4I-0526	-7RHGC	5.409
Artery	GTEX-1CB4I-1826	-793CX	6.495
Artery	GTEX-1CB4J-0126	-7PC3K	8.364
Artery	GTEX-1CB4J-1026	-7P8RW	7.176
Artery	GTEX-1E1VI-0626	-7PBZ1	12.54
Artery	GTEX-1E1VI-1226	-7RHGD	11.34
Artery	GTEX-1E2YA-0426	-7RHFZ	8.39
Artery	GTEX-1EH9U-0526	-7PBZ3	9.059
Artery	GTEX-1EKGG-0326	-9WYTG	10.13
[truncated: 11,798 more rows]

## Sheet: raw_TPM_values_cancer
Tissue	Cancer Progression	TCGA ID	Full Disease Name	Library ID	Cell Line ID	SALL2 (ENSG00000165821.11)
adrenal	primary_cancer	TCGA-OR-A5K5-01A-11R-A29S-07	Adrenocortical carcinoma	c70685d2-1d32-44f9-9ce6-e44b229e0bb0	NA	3.129
adrenal	primary_cancer	TCGA-W2-A7HF-01A-11R-A35L-07	Pheochromocytoma and Paraganglioma	d7a07593-9b26-4028-aa23-98d2b3e2f331	NA	17.904
adrenal	primary_cancer	TCGA-P8-A5KC-01A-11R-A35K-07	Pheochromocytoma and Paraganglioma	f8c789c9-629e-4a36-9cbf-2e52ecabe74c	NA	6.763
adrenal	primary_cancer	TCGA-WB-A81K-01A-11R-A35L-07	Pheochromocytoma and Paraganglioma	d1dd5b3b-40b8-4740-ba42-1fe4ba4e35d1	NA	6.522
adrenal	primary_cancer	TCGA-OR-A5JJ-01A-11R-A29S-07	Adrenocortical carcinoma	39336e11-24de-43be-913a-c764310d1eee	NA	3.637
adrenal	primary_cancer	TCGA-QR-A6GX-01A-11R-A35K-07	Pheochromocytoma and Paraganglioma	dffc4440-e64a-4235-9e1e-e313f25a2bb5	NA	18.188
adrenal	primary_cancer	TCGA-OR-A5K6-01A-11R-A29S-07	Adrenocortical carcinoma	eeda9161-2cf5-4ae2-b8ca-99bd13c053e4	NA	8.901
adrenal	primary_cancer	TCGA-OR-A5J6-01A-31R-A29S-07	Adrenocortical carcinoma	bb6e0e73-ff48-4627-bce6-f672c06b7de4	NA	1.945
adrenal	primary_cancer	TCGA-SP-A6QC-01A-11R-A35L-07	Pheochromocytoma and Paraganglioma	6d58864b-b895-4908-bf83-3e7535f946bc	NA	19.465
adrenal	primary_cancer	TCGA-OR-A5LG-01A-11R-A29S-07	Adrenocortical carcinoma	bdacf802-7670-445e-a1bc-1833c833940e	NA	6.082
adrenal	primary_cancer	TCGA-WB-A81W-01A-11R-A35L-07	Pheochromocytoma and Paraganglioma	09eb0599-7435-4c1f-b96b-a02a490fb246	NA	27.633
adrenal	primary_cancer	TCGA-QR-A70X-01A-11R-A35K-07	Pheochromocytoma and Paraganglioma	79cbef95-e0ce-40bd-8c93-5d2383ad4cbe	NA	13.472
adrenal	primary_cancer	TCGA-OR-A5JS-01A-11R-A29S-07	Adrenocortical carcinoma	68b2e310-e0a0-4867-b9cf-69b43cbdabce	NA	8.104
adrenal	primary_cancer	TCGA-QR-A70P-01A-11R-A35K-07	Pheochromocytoma and Paraganglioma	c4fbc7f9-5a13-40bf-ae16-9d146d7f79b2	NA	22.01
adrenal	primary_cancer	TCGA-QR-A70N-01A-12R-A35K-07	Pheochromocytoma and Paraganglioma	9393f6bc-5b3c-4cad-8141-8076f9d4ffce	NA	4.269
adrenal	primary_cancer	TCGA-P6-A5OF-01A-11R-A29S-07	Adrenocortical carcinoma	ca5f547a-8ec9-4436-9878-1f1cab2fa329	NA	1.124
adrenal	primary_cancer	TCGA-PK-A5H9-01A-11R-A29S-07	Adrenocortical carcinoma	207683b6-6a60-44ef-8eb2-d26ed9a7de76	NA	0.39
adrenal	primary_cancer	TCGA-OR-A5JR-01A-11R-A29S-07	Adrenocortical carcinoma	cc3d79b1-66a4-4f17-bdb1-c91ffab17037	NA	0.85
adrenal	primary_cancer	TCGA-SP-A6QK-01A-11R-A35L-07	Pheochromocytoma and Paraganglioma	6e8968b9-e233-4938-8e66-79b1181e23b0	NA	7.728
adrenal	primary_cancer	TCGA-WB-A818-01A-11R-A35L-07	Pheochromocytoma and Paraganglioma	7374c112-195a-4bb5-b047-cdc99b0841ec	NA	21.78
adrenal	primary_cancer	TCGA-RW-A67W-01A-11R-A35K-07	Pheochromocytoma and Paraganglioma	3838e293-3045-4310-bea8-c94db4a79c3e	NA	8.846
adrenal	primary_cancer	TCGA-QR-A70U-01A-11R-A35K-07	Pheochromocytoma and Paraganglioma	0275d061-9d9e-4f3e-9fcd-44566dd9ccd9	NA	17.92
adrenal	primary_cancer	TCGA-S7-A7X0-01A-12R-A35L-07	Pheochromocytoma and Paraganglioma	8f7f8fcd-829f-44fc-83d0-20fe5ddb8642	NA	17.295
adrenal	primary_cancer	TCGA-QT-A7U0-01A-11R-A35K-07	Pheochromocytoma and Paraganglioma	d2589a77-5a81-4e9b-8ca8-5adebb259b54	NA	17.331
adrenal	primary_cancer	TCGA-QR-A70T-01A-11R-A35K-07	Pheochromocytoma and Paraganglioma	5e413540-8945-45ce-a033-8901ee56eb7d	NA	15.775
adrenal	primary_cancer	TCGA-QR-A70V-01A-11R-A35K-07	Pheochromocytoma and Paraganglioma	e9566249-b898-4da6-ae19-360b3c71aa20	NA	24.338
adrenal	primary_cancer	TCGA-WB-A81F-01A-11R-A35L-07	Pheochromocytoma and Paraganglioma	467b29ec-2529-4553-85d7-b64107791eb5	NA	21.405
adrenal	primary_cancer	TCGA-WB-A81A-01A-11R-A35L-07	Pheochromocytoma and Paraganglioma	5230a88e-698c-4c4c-a54a-d960d2da3214	NA	16.784
adrenal	primary_cancer	TCGA-RM-A68W-01A-11R-A35K-07	Pheochromocytoma and Paraganglioma	92d92d33-6f95-4b8f-ad23-bb87d43773de	NA	19.336
adrenal	primary_cancer	TCGA-OR-A5L5-01A-11R-A29S-07	Adrenocortical carcinoma	2928fe95-b646-44a3-808a-36f0751c887b	NA	2.157
adrenal	primary_cancer	TCGA-TT-A6YO-01A-11R-A35L-07	Pheochromocytoma and Paraganglioma	ad7199e5-0e3c-44dc-9166-7d3b23fe43e9	NA	0.457
adrenal	primary_cancer	TCGA-WB-A81R-01A-11R-A35L-07	Pheochromocytoma and Paraganglioma	e69bb6e7-9c70-4eb0-ab2a-6921dfff0c38	NA	21.328
adrenal	primary_cancer	TCGA-QR-A70M-01A-11R-A35K-07	Pheochromocytoma and Paraganglioma	c6b67553-7a87-468e-90fd-cb6df1e5db5b	NA	22.011
adrenal	primary_cancer	TCGA-QR-A70O-01A-11R-A35K-07	Pheochromocytoma and Paraganglioma	c9bd38a7-823d-4019-8016-1e5bd8cd8ee1	NA	1.221
adrenal	primary_cancer	TCGA-PR-A5PF-01A-11R-A35K-07	Pheochromocytoma and Paraganglioma	b53cf9af-aa70-416e-b430-1271660c6841	NA	27.558
adrenal	primary_cancer	TCGA-SQ-A6I6-01A-11R-A35L-07	Pheochromocytoma and Paraganglioma	30bf9d46-b868-43c0-a605-e6808c036d77	NA	35.201
adrenal	primary_cancer	TCGA-QR-A6GZ-05A-11R-A35K-07	Pheochromocytoma and Paraganglioma	52f1bc0d-3386-4f6c-9b8f-442d42655bba	NA	25.265
adrenal	primary_cancer	TCGA-RW-A67V-01A-11R-A35K-07	Pheochromocytoma and Paraganglioma	e5cd9627-d938-43e8-ab5a-7e61ca1a887a	NA	4.137
adrenal	primary_cancer	TCGA-RM-A68T-01A-11R-A35K-07	Pheochromocytoma and Paraganglioma	534e617a-bcbe-4e5e-b4e9-4b979f6dfa54	NA	24.43
adrenal	primary_cancer	TCGA-OR-A5JW-01A-11R-A29S-07	Adrenocortical carcinoma	a499a77e-4584-4cab-a7d9-3d0b42ed4dd8	NA	0.707
adrenal	primary_cancer	TCGA-SR-A6MV-01A-11R-A35L-07	Pheochromocytoma and Paraganglioma	01f0386d-7263-42c4-8b4f-0ce542414c6d	NA	6.844
adrenal	primary_cancer	TCGA-QR-A6GU-01A-11R-A35K-07	Pheochromocytoma and Paraganglioma	f813cdc6-f6e5-4d53-a9b3-841b091aea32	NA	13.376
adrenal	primary_cancer	TCGA-S7-A7WP-01A-11R-A35L-07	Pheochromocytoma and Paraganglioma	76ed9300-2e50-4791-973c-6ee8bec19f6f	NA	6.758
adrenal	primary_cancer	TCGA-SR-A6MY-01A-11R-A35L-07	Pheochromocytoma and Paraganglioma	c6b39e1f-7695-4b33-a71e-938734a8993c	NA	12.481
adrenal	primary_cancer	TCGA-W2-A7H5-01B-11R-A35L-07	Pheochromocytoma and Paraganglioma	d5dcffa7-2d14-4826-a55f-acec4e9b282c	NA	17.891
adrenal	primary_cancer	TCGA-PK-A5H8-01A-11R-A29S-07	Adrenocortical carcinoma	cdb932bf-d02c-4c3c-9e71-22eb12623977	NA	2.614
adrenal	primary_cancer	TCGA-S7-A7WQ-01A-12R-A35L-07	Pheochromocytoma and Paraganglioma	1f96103c-6baa-4ef0-8134-a34af346295b	NA	7.069
adrenal	primary_cancer	TCGA-P7-A5NY-05A-11R-A35K-07	Pheochromocytoma and Paraganglioma	08f40bb8-22b9-4fe3-be97-6041aafe35e7	NA	21.697
adrenal	primary_cancer	TCGA-RX-A8JQ-01A-11R-A35L-07	Pheochromocytoma and Paraganglioma	faa89b72-ce59-4f2a-b992-72af20963202	NA	26.906
adrenal	primary_cancer	TCGA-WB-A81T-01A-11R-A35L-07	Pheochromocytoma and Paraganglioma	b095864c-bcf7-41cc-b49f-a76b1adfe6d1	NA	27.206
adrenal	primary_cancer	TCGA-WB-A81E-01A-11R-A35L-07	Pheochromocytoma and Paraganglioma	7b6a1a09-716e-4382-88b3-e36dcfadcba7	NA	32.518
adrenal	primary_cancer	TCGA-SP-A6QH-01A-21R-A35L-07	Pheochromocytoma and Paraganglioma	5d88a24f-8626-4f65-b034-f85282eef80e	NA	6.773
adrenal	primary_cancer	TCGA-QR-A70C-01A-21R-A35K-07	Pheochromocytoma and Paraganglioma	08ed2b94-bffb-4814-9b9c-cbed531cd1a1	NA	6.432
adrenal	primary_cancer	TCGA-WB-A81H-01A-11R-A35L-07	Pheochromocytoma and Paraganglioma	2a8232ef-ce9b-47f7-9b78-da42ac45355f	NA	13.566
adrenal	primary_cancer	TCGA-OR-A5L8-01A-11R-A29S-07	Adrenocortical carcinoma	3fd3dae2-aeeb-4d42-abcd-7ff49079e909	NA	13.859
adrenal	primary_cancer	TCGA-SP-A6QF-01A-12R-A35L-07	Pheochromocytoma and Paraganglioma	e1de4889-03a7-4e3b-8759-1eb9e087725e	NA	6.443
adrenal	primary_cancer	TCGA-OU-A5PI-01A-12R-A29S-07	Adrenocortical carcinoma	7d3369ab-b556-45c5-aaaf-e7cd9ac0d454	NA	21.62
adrenal	primary_cancer	TCGA-WB-A817-01A-11R-A35L-07	Pheochromocytoma and Paraganglioma	07771c8c-332b-4a93-bb47-10195f148957	NA	6.916
adrenal	primary_cancer	TCGA-WB-A814-01A-11R-A35L-07	Pheochromocytoma and Paraganglioma	0172416d-e694-4e99-bd93-fa6ac04dda81	NA	9.928
adrenal	primary_cancer	TCGA-OR-A5J3-01A-11R-A29S-07	Adrenocortical carcinoma	83b02107-0c7c-450d-84aa-9ed4e1d755c5	NA	4.682
adrenal	primary_cancer	TCGA-SR-A6MR-01A-11R-A35L-07	Pheochromocytoma and Paraganglioma	43294ec5-2c5b-4931-8c24-af98a08d5213	NA	5.486
adrenal	primary_cancer	TCGA-OR-A5L9-01A-11R-A29S-07	Adrenocortical carcinoma	cfa39c30-f619-4cf8-8460-31d5e5a3b3ba	NA	0.171
adrenal	primary_cancer	TCGA-RW-A67Y-01A-11R-A35K-07	Pheochromocytoma and Paraganglioma	c8367fe4-687e-4f4d-8564-2d46d05e460d	NA	20.389
adrenal	primary_cancer	TCGA-SR-A6MX-05A-11R-A35L-07	Pheochromocytoma and Paraganglioma	8121e7ad-1325-431e-8d64-6eabfde1c5f8	NA	10.407
adrenal	primary_cancer	TCGA-W2-A7H7-01A-11R-A35L-07	Pheochromocytoma and Paraganglioma	1310852c-459c-4abf-a6bf-993fcf3faeff	NA	9.75
adrenal	primary_cancer	TCGA-QR-A6GY-01A-11R-A35K-07	Pheochromocytoma and Paraganglioma	6b234ea7-7c91-4880-92c6-12ebc5520c90	NA	13.479
adrenal	primary_cancer	TCGA-OR-A5LP-01A-11R-A29S-07	Adrenocortical carcinoma	62428588-d744-40ee-9318-f09c64e95898	NA	0.191
adrenal	primary_cancer	TCGA-QT-A5XL-01A-11R-A35K-07	Pheochromocytoma and Paraganglioma	270574c4-6a67-4639-9fd8-7734044ac317	NA	23.159
adrenal	primary_cancer	TCGA-W2-A7HC-01A-11R-A35L-07	Pheochromocytoma and Paraganglioma	b80146b3-ebce-461c-9c30-f089c7039828	NA	21.723
adrenal	primary_cancer	TCGA-QR-A70J-01A-11R-A35K-07	Pheochromocytoma and Paraganglioma	6f669cee-b2a9-4912-b972-2a1f73db4bd2	NA	2.293
adrenal	primary_cancer	TCGA-QT-A5XM-01A-11R-A35K-07	Pheochromocytoma and Paraganglioma	734756ba-8004-4b24-837a-75f326d1df08	NA	10.03
adrenal	primary_cancer	TCGA-WB-A80Q-01A-11R-A35L-07	Pheochromocytoma and Paraganglioma	5802832e-0c7c-4ca1-b556-906a20be861e	NA	2.618
adrenal	primary_cancer	TCGA-RW-A8AZ-01A-11R-A35K-07	Pheochromocytoma and Paraganglioma	9ee6277c-e6d1-494e-92b9-1df4b81ba155	NA	5.808
adrenal	primary_cancer	TCGA-OR-A5JQ-01A-11R-A29S-07	Adrenocortical carcinoma	f0461f9a-e85e-42c6-8f4b-e5974a0e78f8	NA	1.375
adrenal	primary_cancer	TCGA-OR-A5L6-01A-11R-A29S-07	Adrenocortical carcinoma	68206c96-7d72-43e9-92c8-75f6b5a3f14c	NA	0.211
adrenal	primary_cancer	TCGA-P8-A6RX-01A-11R-A35K-07	Pheochromocytoma and Paraganglioma	4d7eab0f-9ff4-49b5-ac79-9bc65a808882	NA	7.867
adrenal	primary_cancer	TCGA-OR-A5LO-01A-11R-A29S-07	Adrenocortical carcinoma	a70e4d3e-993e-4ab7-95b9-1c52f452ef63	NA	8.045
adrenal	primary_cancer	TCGA-WB-A822-01A-11R-A35L-07	Pheochromocytoma and Paraganglioma	89ba1e47-fba2-4222-aaeb-bb2365807fbd	NA	3.078
adrenal	primary_cancer	TCGA-WB-A80L-01A-11R-A35L-07	Pheochromocytoma and Paraganglioma	a30dd71f-039e-4713-995d-3237b7b5cbe3	NA	9.91
adrenal	primary_cancer	TCGA-OR-A5K1-01A-11R-A29S-07	Adrenocortical carcinoma	b6c575a4-ebbc-413d-955d-bb3c46ec50c2	NA	0.849
adrenal	primary_cancer	TCGA-SR-A6MZ-01A-11R-A35L-07	Pheochromocytoma and Paraganglioma	0d74c61e-34fe-4345-bc5e-4bf32464d0a6	NA	13.165
adrenal	primary_cancer	TCGA-OR-A5LE-01A-11R-A29S-07	Adrenocortical carcinoma	d5597a19-f3ff-431b-85ba-d2f306fe2fab	NA	4.641
adrenal	primary_cancer	TCGA-WB-A81P-01A-11R-A35L-07	Pheochromocytoma and Paraganglioma	420ac635-2482-4a6d-ac4f-5c8dd7f82401	NA	37.057
adrenal	primary_cancer	TCGA-QR-A70R-01A-11R-A35K-07	Pheochromocytoma and Paraganglioma	db8d4662-feee-44d6-9825-5ad9424640a2	NA	7.056
adrenal	primary_cancer	TCGA-QR-A6H3-01A-11R-A35K-07	Pheochromocytoma and Paraganglioma	47a386b5-7214-48b3-91fa-ce7101b8d662	NA	14.62
adrenal	primary_cancer	TCGA-OR-A5JL-01A-11R-A29S-07	Adrenocortical carcinoma	3e28c232-4f00-446e-8e2c-13b7ce533442	NA	6.287
adrenal	primary_cancer	TCGA-QR-A70Q-01A-13R-A35K-07	Pheochromocytoma and Paraganglioma	ab73be97-98a8-424d-babf-c6802c10dc1e	NA	8.884
adrenal	primary_cancer	TCGA-P7-A5NX-01A-11R-A35K-07	Pheochromocytoma and Paraganglioma	2dc9f559-fbfd-4290-82d2-e65bc3d8c0e4	NA	29.52
adrenal	primary_cancer	TCGA-OR-A5JY-01A-31R-A29S-07	Adrenocortical carcinoma	1fe73f5c-591d-4c55-ae0e-a67afb64f872	NA	1.384
adrenal	primary_cancer	TCGA-RW-A689-01A-11R-A35K-07	Pheochromocytoma and Paraganglioma	2addf84e-ba23-45e5-beb1-99a8217d3c30	NA	17.984
adrenal	primary_cancer	TCGA-PK-A5HB-01A-11R-A29S-07	Adrenocortical carcinoma	c92f7cf7-f63b-4f04-a391-193f65a6f8a7	NA	3.35
adrenal	primary_cancer	TCGA-OR-A5JP-01A-11R-A29S-07	Adrenocortical carcinoma	49e3ffbc-f75f-4f3d-99de-12c29ef69154	NA	0.77
adrenal	primary_cancer	TCGA-S7-A7X1-01A-11R-A35L-07	Pheochromocytoma and Paraganglioma	b4028e6e-0010-42a3-b84b-e4c5594c86df	NA	6.499
adrenal	primary_cancer	TCGA-RW-A68G-01A-11R-A35K-07	Pheochromocytoma and Paraganglioma	dd851272-51a0-456c-87e6-b31dcdf4d36f	NA	8.945
adrenal	primary_cancer	TCGA-OR-A5KZ-01A-11R-A29S-07	Adrenocortical carcinoma	6991a561-ff49-4546-9bc7-74cca88916ae	NA	0.736
adrenal	primary_cancer	TCGA-WB-A80N-01A-11R-A35L-07	Pheochromocytoma and Paraganglioma	4f6640d7-8b5b-4f5c-8379-e27e6c0bce44	NA	18.038
adrenal	primary_cancer	TCGA-QR-A70A-01A-11R-A35K-07	Pheochromocytoma and Paraganglioma	1a166c96-b6cc-4398-a1ca-d23c255fd783	NA	10.48
adrenal	primary_cancer	TCGA-RW-A7D0-01A-11R-A35K-07	Pheochromocytoma and Paraganglioma	274eebbb-f481-4c6b-bae3-da27efdef3d5	NA	17.393
adrenal	primary_cancer	TCGA-PA-A5YG-01A-11R-A29S-07	Adrenocortical carcinoma	379e288c-fa30-460c-bb57-d3b6f09b1483	NA	0.221
adrenal	primary_cancer	TCGA-SR-A6MU-01A-11R-A35L-07	Pheochromocytoma and Paraganglioma	b0d0bc0c-201d-42c0-988b-11f5aab60ede	NA	4.209
adrenal	primary_cancer	TCGA-WB-A81J-01A-11R-A35L-07	Pheochromocytoma and Paraganglioma	b5c88aed-daf9-4746-9b87-44ec9ce1a70a	NA	26.879
adrenal	primary_cancer	TCGA-OR-A5LL-01A-11R-A29S-07	Adrenocortical carcinoma	63f6ab7c-2ef7-42a3-afda-0289383a6976	NA	0.742
adrenal	primary_cancer	TCGA-QR-A70E-01A-11R-A35K-07	Pheochromocytoma and Paraganglioma	9959f266-1024-4dfc-b1d8-3c3a3cf2125d	NA	34.114
adrenal	primary_cancer	TCGA-RW-A68D-01A-11R-A35K-07	Pheochromocytoma and Paraganglioma	cf58f205-e3e2-4eec-8df2-22adf77d6ec1	NA	38.199
adrenal	primary_cancer	TCGA-OR-A5LB-01A-11R-A29S-07	Adrenocortical carcinoma	881f6b71-7088-42c8-bfec-c86943715b56	NA	19.438
adrenal	primary_cancer	TCGA-W2-A7HD-01A-11R-A35L-07	Pheochromocytoma and Paraganglioma	0a4fe787-7462-4fa2-9fd1-7424a966f541	NA	31.04
adrenal	primary_cancer	TCGA-OR-A5KU-01A-11R-A29S-07	Adrenocortical carcinoma	c2e40ad2-0d7f-4e25-a93a-f9dba30bc838	NA	0.737
adrenal	primary_cancer	TCGA-S7-A7X2-01A-12R-A35L-07	Pheochromocytoma and Paraganglioma	749030db-8f34-4348-a3b2-143600d7aad2	NA	27.018
adrenal	primary_cancer	TCGA-OR-A5JO-01A-11R-A29S-07	Adrenocortical carcinoma	ebc120e7-d75d-425a-b9af-aa0e76520642	NA	0.905
adrenal	primary_cancer	TCGA-WB-A816-01A-11R-A35L-07	Pheochromocytoma and Paraganglioma	d912e540-038b-4862-92d0-3af57d120cd6	NA	9.593
adrenal	primary_cancer	TCGA-OR-A5JB-01A-11R-A29S-07	Adrenocortical carcinoma	26861b93-29de-42df-80d6-23260d450391	NA	3.685
adrenal	primary_cancer	TCGA-QT-A5XP-01A-11R-A35K-07	Pheochromocytoma and Paraganglioma	13a6c447-2479-4719-8f2b-7e0b1a3d2883	NA	16.511
adrenal	primary_cancer	TCGA-PR-A5PG-01A-11R-A35K-07	Pheochromocytoma and Paraganglioma	e9f19ad6-67cb-469a-bce1-92e8934c7400	NA	26.465
adrenal	primary_cancer	TCGA-TT-A6YN-01A-12R-A35L-07	Pheochromocytoma and Paraganglioma	639eeaea-0da3-4bf5-9ec7-f5cd356142ed	NA	36.901
adrenal	primary_cancer	TCGA-WB-A81N-01A-11R-A35L-07	Pheochromocytoma and Paraganglioma	342e3c12-c4c5-4fc9-9a6c-babc11ac944e	NA	33.449
adrenal	primary_cancer	TCGA-WB-A80P-01A-11R-A35L-07	Pheochromocytoma and Paraganglioma	55ad376a-2d52-45b2-854e-1ea1c67765f6	NA	20.992
adrenal	primary_cancer	TCGA-WB-A815-01A-11R-A35L-07	Pheochromocytoma and Paraganglioma	2ea07252-37a1-4c62-924c-6674242fe238	NA	23.36
adrenal	primary_cancer	TCGA-S7-A7WO-01A-11R-A35L-07	Pheochromocytoma and Paraganglioma	7fa1bbfe-f0e7-40d9-97fb-992b97729f96	NA	5.949
adrenal	primary_cancer	TCGA-QR-A6GR-01A-11R-A35K-07	Pheochromocytoma and Paraganglioma	9a429f7d-2445-468f-b5e4-cb8ea5059ff2	NA	16.795
adrenal	primary_cancer	TCGA-OR-A5KT-01A-11R-A29S-07	Adrenocortical carcinoma	8448744c-2c5f-4a95-b517-5652f6bacc1a	NA	1.836
adrenal	primary_cancer	TCGA-QR-A6H6-01A-11R-A35K-07	Pheochromocytoma and Paraganglioma	e37650fb-30e7-4fc5-bf02-25d5dbfccc29	NA	15.283
adrenal	primary_cancer	TCGA-XG-A823-01A-11R-A35L-07	Pheochromocytoma and Paraganglioma	1d3edb73-2445-43e4-b33e-be68b26c63f3	NA	6.253
adrenal	primary_cancer	TCGA-WB-A81D-01A-11R-A35L-07	Pheochromocytoma and Paraganglioma	068b2053-5df0-411c-9384-f3bd52c76065	NA	35.724
adrenal	primary_cancer	TCGA-QR-A6GW-01A-11R-A35K-07	Pheochromocytoma and Paraganglioma	21363134-c998-4af5-8052-59fa30f18176	NA	26.215
adrenal	primary_cancer	TCGA-OR-A5KO-01A-11R-A29S-07	Adrenocortical carcinoma	0ffc0b01-bc1c-4277-8fc4-865590dcc461	NA	2.259
adrenal	primary_cancer	TCGA-S7-A7WM-01A-12R-A35L-07	Pheochromocytoma and Paraganglioma	be5f6966-6a46-4ed2-8fc0-b97b943ad67a	NA	11.009
adrenal	primary_cancer	TCGA-OR-A5JT-01A-11R-A29S-07	Adrenocortical carcinoma	36c36f8f-d15b-43be-a285-1f80fcfff555	NA	0.536
adrenal	primary_cancer	TCGA-SP-A6QD-01A-12R-A35L-07	Pheochromocytoma and Paraganglioma	abcb146e-a12e-4400-8d55-856de7fb8492	NA	7.259
adrenal	primary_cancer	TCGA-OR-A5JD-01A-11R-A29S-07	Adrenocortical carcinoma	8067d29d-a249-42b9-bd9e-de47513a4230	NA	0.794
adrenal	primary_cancer	TCGA-RW-A67X-01A-11R-A35K-07	Pheochromocytoma and Paraganglioma	cf37c1f7-bda9-4cd2-a3e9-a7c11f7707ca	NA	4.113
adrenal	primary_cancer	TCGA-WB-A81I-01A-11R-A35L-07	Pheochromocytoma and Paraganglioma	90f060d8-632f-466e-9175-e4e1748d684f	NA	16.475
adrenal	primary_cancer	TCGA-QR-A70K-01A-12R-A35K-07	Pheochromocytoma and Paraganglioma	ff30f911-6a2a-47ba-b348-0c0a637579f2	NA	18.745
adrenal	primary_cancer	TCGA-RW-A7CZ-01A-11R-A35K-07	Pheochromocytoma and Paraganglioma	355fc3cd-c43b-41cd-b608-3e88100693fd	NA	13.586
adrenal	primary_cancer	TCGA-SR-A6N0-01A-11R-A35L-07	Pheochromocytoma and Paraganglioma	f15ef4cf-2f81-4c1d-b89c-2f88e33c324d	NA	10.844
adrenal	primary_cancer	TCGA-WB-A80M-01A-11R-A35L-07	Pheochromocytoma and Paraganglioma	02fffe37-3890-4985-abcc-dc450d300659	NA	13.829
adrenal	primary_cancer	TCGA-PR-A5PH-01A-11R-A35K-07	Pheochromocytoma and Paraganglioma	0ff8209b-37f3-4e71-83e7-06d533bd6aa8	NA	5.671
adrenal	primary_cancer	TCGA-SP-A6QJ-01A-11R-A35L-07	Pheochromocytoma and Paraganglioma	83478c86-d662-4b9c-b5fa-c09cf1c6d00d	NA	14.268
adrenal	primary_cancer	TCGA-WB-A80K-01A-11R-A35L-07	Pheochromocytoma and Paraganglioma	ebafc56b-e0e8-45b0-a36c-cc9f4de2e14e	NA	16.233
adrenal	primary_cancer	TCGA-TT-A6YJ-01A-11R-A35L-07	Pheochromocytoma and Paraganglioma	83afb7e3-b801-464e-a6dc-5128f336a113	NA	26.64
adrenal	primary_cancer	TCGA-PK-A5HA-01A-11R-A29S-07	Adrenocortical carcinoma	69d7a879-cf23-44d0-8a44-050b7a3f4b03	NA	0.339
adrenal	primary_cancer	TCGA-OR-A5JA-01A-11R-A29S-07	Adrenocortical carcinoma	d979c964-68e1-4ea4-a473-69b69cba8e5c	NA	1.822
adrenal	primary_cancer	TCGA-OR-A5JI-01A-11R-A29S-07	Adrenocortical carcinoma	d5a1b1c5-f790-4733-a8f5-09372d695688	NA	0.44
adrenal	primary_cancer	TCGA-OR-A5J1-01A-11R-A29S-07	Adrenocortical carcinoma	37e88158-0743-45b8-87cf-1d7fe878527f	NA	0.942
adrenal	primary_cancer	TCGA-WB-A80O-01A-11R-A35L-07	Pheochromocytoma and Paraganglioma	3cb892b5-2e68-4f7d-8c0f-f6d0a1577e0c	NA	26.883
adrenal	primary_cancer	TCGA-WB-A81M-01A-11R-A35L-07	Pheochromocytoma and Paraganglioma	78959883-a07c-41e2-8002-6032b710e4b3	NA	28.569
adrenal	primary_cancer	TCGA-OR-A5J9-01A-11R-A29S-07	Adrenocortical carcinoma	a818d2cc-4d45-40df-bfcb-9fa08ebf8490	NA	9.737
adrenal	metastasis	TCGA-RW-A686-06A-11R-A35K-07	Pheochromocytoma and Paraganglioma	eaf6306d-f11d-4b21-be36-6ef6750fb4c4	NA	17.517
adrenal	primary_cancer	TCGA-QR-A70W-01A-12R-A35K-07	Pheochromocytoma and Paraganglioma	1971661a-5b77-4c90-8c1a-c81e9abebec5	NA	15.014
adrenal	primary_cancer	TCGA-W2-A7UY-01A-11R-A35L-07	Pheochromocytoma and Paraganglioma	38344f50-9bf3-4386-8eeb-e8a79ca1ee8e	NA	3.824
adrenal	primary_cancer	TCGA-OR-A5LD-01A-11R-A29S-07	Adrenocortical carcinoma	efd6520f-20a3-416b-87ce-6a1da0da448d	NA	0.008
adrenal	primary_cancer	TCGA-S7-A7WL-01A-11R-A35L-07	Pheochromocytoma and Paraganglioma	2949f94b-4965-4d54-a1f8-247069ea7298	NA	16.363
adrenal	primary_cancer	TCGA-S7-A7WW-01A-11R-A35L-07	Pheochromocytoma and Paraganglioma	2f0e0b9f-2660-4f2a-b6f3-e5c5476238ca	NA	12.137
adrenal	primary_cancer	TCGA-OR-A5JF-01A-11R-A29S-07	Adrenocortical carcinoma	ba350477-3c49-4258-8409-f39447687497	NA	0.832
adrenal	primary_cancer	TCGA-OR-A5LT-01A-11R-A29S-07	Adrenocortical carcinoma	c18bba08-b10a-4237-96a6-5f89efa59826	NA	1.867
adrenal	primary_cancer	TCGA-TT-A6YP-01A-21R-A35L-07	Pheochromocytoma and Paraganglioma	ceffbb74-affa-4aca-a90b-e5f9d55ad39f	NA	8.862
adrenal	primary_cancer	TCGA-OR-A5LR-01A-11R-A29S-07	Adrenocortical carcinoma	70b87c96-d585-4260-aa9a-7a5ee37d1b10	NA	0.417
adrenal	primary_cancer	TCGA-P8-A6RY-01A-12R-A35K-07	Pheochromocytoma and Paraganglioma	822e5a1e-8118-4940-8bd4-bc3f8d678c09	NA	14.617
adrenal	primary_cancer	TCGA-WB-A81G-01A-11R-A35L-07	Pheochromocytoma and Paraganglioma	bf24582f-1c4b-419a-8ee2-58d8531dde5f	NA	25.54
adrenal	primary_cancer	TCGA-OR-A5K3-01A-11R-A29S-07	Adrenocortical carcinoma	61d60013-6ffd-4c08-b03f-a8820db32397	NA	0.291
adrenal	primary_cancer	TCGA-OR-A5KY-01A-11R-A29S-07	Adrenocortical carcinoma	bf4dc301-6b99-46c3-bdc4-d85905688e05	NA	4.475
adrenal	primary_cancer	TCGA-P6-A5OG-01A-22R-A29S-07	Adrenocortical carcinoma	b5a3bdce-d4ad-43a6-8fbc-1e9d31dc2564	NA	0.953
adrenal	primary_cancer	TCGA-QR-A706-01A-11R-A35K-07	Pheochromocytoma and Paraganglioma	7c65b352-e682-4757-a1ee-4afc74a2d62d	NA	7.216
adrenal	primary_cancer	TCGA-S7-A7WU-01A-11R-A35L-07	Pheochromocytoma and Paraganglioma	e8d3931d-0611-4c2d-8c8c-1ef12b00a5e1	NA	36.104
adrenal	primary_cancer	TCGA-WB-A820-01A-11R-A35L-07	Pheochromocytoma and Paraganglioma	a75fa2d5-0c31-45a7-831a-357443c12483	NA	25.825
adrenal	primary_cancer	TCGA-RW-A68C-01A-11R-A35K-07	Pheochromocytoma and Paraganglioma	62120496-0ec0-445b-8cf7-5335dc6eb2ae	NA	6.988
adrenal	primary_cancer	TCGA-QT-A5XJ-01A-11R-A35K-07	Pheochromocytoma and Paraganglioma	8f143ea3-314d-4d89-ad70-6209ff9852d4	NA	37.86
adrenal	primary_cancer	TCGA-WB-A80V-01A-12R-A35L-07	Pheochromocytoma and Paraganglioma	3fbe748d-9051-4835-a5ee-adfa379b1415	NA	17.308
adrenal	primary_cancer	TCGA-OR-A5K9-01A-11R-A29S-07	Adrenocortical carcinoma	48dd74fe-11ff-4514-87b3-1569e9606c73	NA	1.061
adrenal	metastasis	TCGA-SR-A6MX-06A-11R-A35L-07	Pheochromocytoma and Paraganglioma	3e0f51da-21ee-405c-8d56-e2578cab4901	NA	20.247
adrenal	primary_cancer	TCGA-QR-A6H1-01A-11R-A35K-07	Pheochromocytoma and Paraganglioma	48360943-522a-4dbe-a99c-5a1ac8fc4e47	NA	19.835
adrenal	primary_cancer	TCGA-OR-A5LC-01A-11R-A29S-07	Adrenocortical carcinoma	cbe8e9e4-f555-47ce-9905-d9f95637c18a	NA	4.377
adrenal	primary_cancer	TCGA-OR-A5KV-01A-11R-A29S-07	Adrenocortical carcinoma	512b54a3-49c4-4dbd-b853-290500c00e81	NA	10.766
adrenal	primary_cancer	TCGA-OR-A5K0-01A-11R-A29S-07	Adrenocortical carcinoma	e1434398-dde0-4855-adc1-24c2956d817a	NA	0.903
adrenal	primary_cancer	TCGA-QR-A700-01A-11R-A35K-07	Pheochromocytoma and Paraganglioma	9a738f7b-2a84-47af-bba4-b79a945872e2	NA	7
adrenal	primary_cancer	TCGA-W2-A7HE-01A-11R-A35L-07	Pheochromocytoma and Paraganglioma	b85005d9-b5ed-4b0c-8a8d-adaeac34b08e	NA	18.843
adrenal	primary_cancer	TCGA-W2-A7HA-01B-11R-A35L-07	Pheochromocytoma and Paraganglioma	c688d205-4bc6-4b47-bf68-f77fa0ade2a5	NA	26.973
adrenal	primary_cancer	TCGA-RW-A686-01A-11R-A35K-07	Pheochromocytoma and Paraganglioma	8a2e5312-9379-4355-ab4a-31de5065d3dc	NA	23.495
adrenal	primary_cancer	TCGA-P7-A5NY-01A-12R-A35K-07	Pheochromocytoma and Paraganglioma	f9d224fb-5f3b-4261-8625-29c117b0b56c	NA	36.007
adrenal	primary_cancer	TCGA-RW-A681-01A-11R-A35K-07	Pheochromocytoma and Paraganglioma	b3133dcd-d39f-441d-b553-0fe4553fc2ed	NA	44.262
adrenal	primary_cancer	TCGA-QR-A7IP-01A-11R-A35K-07	Pheochromocytoma and Paraganglioma	a9efcdd6-eb6e-40c9-9bc2-0297d1ec8f6b	NA	24.61
adrenal	primary_cancer	TCGA-RW-A684-01A-12R-A35K-07	Pheochromocytoma and Paraganglioma	c64368f9-ec98-4417-bc41-c19ae5b043a5	NA	14.682
adrenal	primary_cancer	TCGA-QR-A6GZ-01A-11R-A35K-07	Pheochromocytoma and Paraganglioma	187074a8-21c9-46fb-9d36-7968d5a87314	NA	7.617
adrenal	primary_cancer	TCGA-OR-A5LH-01A-11R-A29S-07	Adrenocortical carcinoma	44c5a1b9-e7e0-41ae-85e2-d1f05915ce3c	NA	0.839
adrenal	primary_cancer	TCGA-QR-A70I-01A-11R-A35K-07	Pheochromocytoma and Paraganglioma	419325de-c6ad-4d9f-a470-4c64431ba335	NA	19.604
adrenal	primary_cancer	TCGA-OR-A5J2-01A-11R-A29S-07	Adrenocortical carcinoma	421bbd6b-fb2a-4a6d-a298-057c1b65f041	NA	3.781
adrenal	primary_cancer	TCGA-S7-A7WV-01A-11R-A35L-07	Pheochromocytoma and Paraganglioma	aaa4291c-795b-4bca-aab5-6c0c795a7ef4	NA	2.533
adrenal	primary_cancer	TCGA-OR-A5J7-01A-11R-A29S-07	Adrenocortical carcinoma	59eb3b91-d706-45de-9bbe-92b32629c58c	NA	0.975
adrenal	primary_cancer	TCGA-OR-A5K4-01A-11R-A29S-07	Adrenocortical carcinoma	5c9ae88c-353f-450b-80e6-8d36d7bc8be3	NA	0.584
adrenal	primary_cancer	TCGA-QR-A6H4-01A-11R-A35K-07	Pheochromocytoma and Paraganglioma	091fa855-e030-43c9-9abe-62e9e17e3e11	NA	17.76
adrenal	primary_cancer	TCGA-QR-A6H0-01A-11R-A35K-07	Pheochromocytoma and Paraganglioma	776d3a26-fa83-4b65-ad9b-f7d0fd3d5585	NA	20.464
adrenal	primary_cancer	TCGA-P8-A5KD-01A-11R-A35K-07	Pheochromocytoma and Paraganglioma	276a1e00-cf3a-4463-a97b-d544381219ea	NA	33.507
adrenal	primary_cancer	TCGA-OR-A5J8-01A-11R-A29S-07	Adrenocortical carcinoma	73fee5d0-d326-484c-95c6-c40c987c6917	NA	1.516
adrenal	primary_cancer	TCGA-QR-A6GT-01A-11R-A35K-07	Pheochromocytoma and Paraganglioma	0d996919-44ed-43cc-a2ae-99c684ac2707	NA	6.923
adrenal	primary_cancer	TCGA-QR-A705-01A-11R-A35K-07	Pheochromocytoma and Paraganglioma	28eca552-d07d-4c6e-b40d-2dab40660aab	NA	13.466
adrenal	primary_cancer	TCGA-RT-A6YC-01A-12R-A35K-07	Pheochromocytoma and Paraganglioma	e88c6b20-6ca5-4758-a46f-eb2daa1ffac7	NA	10.581
adrenal	primary_cancer	TCGA-SP-A6QG-01A-12R-A35L-07	Pheochromocytoma and Paraganglioma	0d31feba-eda3-482c-bcbf-28f28b6cd9b2	NA	30.422
adrenal	primary_cancer	TCGA-RW-A685-01A-11R-A35K-07	Pheochromocytoma and Paraganglioma	0911ea83-66b8-4255-96a4-cf5b22223cf0	NA	9.412
adrenal	primary_cancer	TCGA-SR-A6MX-01A-11R-A35L-07	Pheochromocytoma and Paraganglioma	4d01a3d8-d9b7-45e7-82d6-420c5d786de2	NA	17.782
adrenal	primary_cancer	TCGA-SR-A6MT-01A-11R-A35L-07	Pheochromocytoma and Paraganglioma	79ad5242-1b2c-4838-b5b6-93fd88ed98d8	NA	26.356
adrenal	primary_cancer	TCGA-W2-A7HB-01A-11R-A35L-07	Pheochromocytoma and Paraganglioma	02ad7be5-f194-4d34-a61d-40138d07477f	NA	35.904
adrenal	primary_cancer	TCGA-OR-A5LA-01A-11R-A29S-07	Adrenocortical carcinoma	8e63ada3-97ca-46ab-984d-6a71a4e4e440	NA	1.113
adrenal	primary_cancer	TCGA-OR-A5K2-01A-11R-A29S-07	Adrenocortical carcinoma	e85fc5ec-7838-46c3-8767-a69f765b066d	NA	0.497
adrenal	primary_cancer	TCGA-QR-A708-01A-11R-A35K-07	Pheochromocytoma and Paraganglioma	2a497089-5263-4338-adac-9a8f82897aae	NA	4.628
adrenal	primary_cancer	TCGA-QR-A702-01A-11R-A35K-07	Pheochromocytoma and Paraganglioma	512bb8af-2748-4186-ac38-f91dc5c683ab	NA	11.659
adrenal	primary_cancer	TCGA-QT-A5XK-01A-11R-A35K-07	Pheochromocytoma and Paraganglioma	f4051cc1-b08f-4657-aeea-5b71394a3fd6	NA	26.782
adrenal	primary_cancer	TCGA-S7-A7WR-01A-11R-A35L-07	Pheochromocytoma and Paraganglioma	a59acb0f-1136-42ff-abb7-6708dcf51563	NA	15.813
adrenal	primary_cancer	TCGA-QR-A707-01A-11R-A35K-07	Pheochromocytoma and Paraganglioma	bcaa4853-de3c-479c-83ac-008181336cba	NA	34.594
adrenal	primary_cancer	TCGA-SR-A6MP-01A-11R-A35L-07	Pheochromocytoma and Paraganglioma	4c81b542-cb70-4b53-850c-03a17237dfdf	NA	5.905
adrenal	primary_cancer	TCGA-WB-A821-01A-11R-A35L-07	Pheochromocytoma and Paraganglioma	6eed26fc-d4c7-4fb9-99c0-54ea55e09091	NA	14.312
adrenal	primary_cancer	TCGA-OR-A5LM-01A-11R-A29S-07	Adrenocortical carcinoma	3367029a-3e6f-49ef-8ff5-421aa0c71b4b	NA	3.825
adrenal	primary_cancer	TCGA-SQ-A6I4-01A-11R-A35L-07	Pheochromocytoma and Paraganglioma	ddcac11d-6dc7-4183-b685-5b4cfb573222	NA	11.136
adrenal	primary_cancer	TCGA-OR-A5JG-01A-11R-A29S-07	Adrenocortical carcinoma	60c8c1da-fea6-41f7-ba5b-33afba1ef301	NA	1.35
adrenal	primary_cancer	TCGA-QT-A5XN-01A-11R-A35K-07	Pheochromocytoma and Paraganglioma	91ec8922-93e2-4e55-ae26-db5e4a71b953	NA	15.603
adrenal	primary_cancer	TCGA-S7-A7WN-01A-12R-A35L-07	Pheochromocytoma and Paraganglioma	801f506a-c31c-47a9-9cd6-cfe7da0222c8	NA	15.099
adrenal	primary_cancer	TCGA-SR-A6MQ-01A-11R-A35L-07	Pheochromocytoma and Paraganglioma	b2dc2165-2964-4aaf-84ab-fa8c56b94ac1	NA	29.473
adrenal	primary_cancer	TCGA-OR-A5J5-01A-11R-A29S-07	Adrenocortical carcinoma	f72bfbe6-411d-412e-aaab-1a2414e544ec	NA	6.952
adrenal	primary_cancer	TCGA-OR-A5LJ-01A-11R-A29S-07	Adrenocortical carcinoma	744e863c-e24e-4eee-b0ee-ee24f2ef7401	NA	8.562
adrenal	primary_cancer	TCGA-OR-A5LS-01A-11R-A29S-07	Adrenocortical carcinoma	67a0828e-86c3-4c46-b05c-104000425669	NA	20.12
adrenal	primary_cancer	TCGA-QR-A6H5-01A-11R-A35K-07	Pheochromocytoma and Paraganglioma	dc201a89-1126-41fb-b59c-34410890dbef	NA	16.296
adrenal	primary_cancer	TCGA-TT-A6YK-01A-11R-A35L-07	Pheochromocytoma and Paraganglioma	951535db-1e3a-436a-989f-52197336b6b6	NA	7.496
adrenal	primary_cancer	TCGA-WB-A81V-01A-11R-A35L-07	Pheochromocytoma and Paraganglioma	081322b7-2088-4950-bfc6-8ce215869974	NA	19.947
adrenal	primary_cancer	TCGA-OR-A5K8-01A-11R-A29S-07	Adrenocortical carcinoma	53390804-e59b-4e73-aee4-89daa7cde164	NA	1.174
adrenal	primary_cancer	TCGA-OR-A5LN-01A-11R-A29S-07	Adrenocortical carcinoma	8ab4c4ac-e348-4fa7-b15b-1b640d771fae	NA	0.22
adrenal	primary_cancer	TCGA-OR-A5JZ-01A-11R-A29S-07	Adrenocortical carcinoma	efd8ce67-122c-4502-8713-2f4dd768c33d	NA	0.069
adrenal	primary_cancer	TCGA-OR-A5KW-01A-11R-A29S-07	Adrenocortical carcinoma	64934de4-399f-4fbc-b283-979ab40addbc	NA	3.38
adrenal	primary_cancer	TCGA-S7-A7WT-01A-12R-A35L-07	Pheochromocytoma and Paraganglioma	ed44bcc4-99b7-4308-8673-64797735fb5a	NA	14.599
adrenal	primary_cancer	TCGA-QR-A703-01A-11R-A35K-07	Pheochromocytoma and Paraganglioma	e8900d00-89cd-43b6-8806-1693c33c8499	NA	9.799
adrenal	primary_cancer	TCGA-QR-A7IN-01A-11R-A35K-07	Pheochromocytoma and Paraganglioma	f2550cd8-e489-42c3-be9d-31f765c15fcb	NA	10.746
adrenal	primary_cancer	TCGA-OR-A5JX-01A-11R-A29S-07	Adrenocortical carcinoma	7fae0485-2028-47e3-a3e1-248257fcc02e	NA	2.398
adrenal	primary_cancer	TCGA-OR-A5KX-01A-11R-A29S-07	Adrenocortical carcinoma	180a84c1-99c0-4014-b42e-8e01f88980aa	NA	12.58
adrenal	primary_cancer	TCGA-QR-A6GO-01A-11R-A35K-07	Pheochromocytoma and Paraganglioma	5bcb5dd5-84a3-48fb-9942-e2f888cbd672	NA	12.686
adrenal	primary_cancer	TCGA-RW-A68F-01A-11R-A35K-07	Pheochromocytoma and Paraganglioma	483dc49d-24ad-49e2-b6eb-cf690eb2509c	NA	25.508
adrenal	primary_cancer	TCGA-QT-A69Q-01A-11R-A35K-07	Pheochromocytoma and Paraganglioma	93ae706d-cb90-4893-aa69-b46561e5ea6e	NA	15.968
adrenal	primary_cancer	TCGA-WB-A819-01A-11R-A35L-07	Pheochromocytoma and Paraganglioma	c2850229-e8a6-436a-9ed9-b8c6b101a0c9	NA	24.993
adrenal	primary_cancer	TCGA-OR-A5L4-01A-11R-A29S-07	Adrenocortical carcinoma	67affce9-7c50-46c9-9f1c-f80c1dd9c888	NA	0.369
adrenal	primary_cancer	TCGA-WB-A80Y-01A-11R-A35L-07	Pheochromocytoma and Paraganglioma	4f8be51b-2aea-44fe-b754-82262225d991	NA	26.878
adrenal	primary_cancer	TCGA-QR-A6H2-01A-11R-A35K-07	Pheochromocytoma and Paraganglioma	38ede230-e4e6-4f03-aeec-1897f4802c78	NA	20.795
adrenal	primary_cancer	TCGA-QR-A70H-01A-12R-A35K-07	Pheochromocytoma and Paraganglioma	d9120f00-7f10-49d5-ae84-6177e9424c7c	NA	10.64
adrenal	primary_cancer	TCGA-RW-A68B-01A-11R-A35K-07	Pheochromocytoma and Paraganglioma	786e4975-18e4-473c-97bf-2f5a57f4cd1d	NA	28.036
adrenal	primary_cancer	TCGA-WB-A81Q-01A-11R-A35L-07	Pheochromocytoma and Paraganglioma	6d552bed-1386-4a0e-bbb5-6abacd2c2cb1	NA	24.809
adrenal	primary_cancer	TCGA-OR-A5JM-01A-11R-A29S-07	Adrenocortical carcinoma	908285b8-1e2e-4aed-86df-2aaeb1bcefea	NA	5.818
adrenal	primary_cancer	TCGA-S7-A7WX-01A-11R-A35L-07	Pheochromocytoma and Paraganglioma	e80ab011-e10d-4201-8701-c2824268d455	NA	19.964
adrenal	primary_cancer	TCGA-RT-A6YA-01A-12R-A35K-07	Pheochromocytoma and Paraganglioma	15419dae-0aa7-437b-8508-1078b88552fc	NA	3.454
adrenal	primary_cancer	TCGA-RW-A688-01A-11R-A35K-07	Pheochromocytoma and Paraganglioma	57cb9b37-a93a-4b21-bac5-e588e56612b4	NA	23.627
adrenal	primary_cancer	TCGA-OR-A5JE-01A-11R-A29S-07	Adrenocortical carcinoma	223e2af0-95a2-49f2-84a2-13379cf72ea9	NA	4.519
adrenal	primary_cancer	TCGA-QR-A70D-01A-11R-A35K-07	Pheochromocytoma and Paraganglioma	ff0535f4-481d-479e-aa3a-715124d9e1d7	NA	24.956
adrenal	primary_cancer	TCGA-WB-A81S-01A-11R-A35L-07	Pheochromocytoma and Paraganglioma	3fcb60a3-8ee8-48b8-a07e-218ca6dbb24a	NA	11.909
adrenal	primary_cancer	TCGA-SP-A6QI-01A-12R-A35L-07	Pheochromocytoma and Paraganglioma	151007c3-6f83-4ea6-9bd7-1cdcad4b61c7	NA	22.261
adrenal	primary_cancer	TCGA-OR-A5JV-01A-11R-A29S-07	Adrenocortical carcinoma	20938e21-2846-4553-98eb-6b005b6600c3	NA	0.315
adrenal	primary_cancer	TCGA-QR-A6GS-01A-11R-A35K-07	Pheochromocytoma and Paraganglioma	a02050d3-7dd0-4c74-afe4-54835d396984	NA	23.844
adrenal	primary_cancer	TCGA-OR-A5JC-01A-11R-A29S-07	Adrenocortical carcinoma	c51255ac-840d-44c2-87ae-ed91cc635e85	NA	5.707
adrenal	primary_cancer	TCGA-RT-A6Y9-01A-12R-A35K-07	Pheochromocytoma and Paraganglioma	269e47df-94de-4d27-86be-3a404cdaaf08	NA	23.392
adrenal	primary_cancer	TCGA-RW-A68A-01A-11R-A35K-07	Pheochromocytoma and Paraganglioma	5b56898c-ea92-4ef1-a877-b68b0c40d1ba	NA	39.195
adrenal	primary_cancer	TCGA-OR-A5L3-01A-11R-A29S-07	Adrenocortical carcinoma	20f7acf8-7813-4ec8-af92-19f92d875a58	NA	0.605
adrenal	primary_cancer	TCGA-RW-A680-01A-11R-A35K-07	Pheochromocytoma and Paraganglioma	6abbad6b-e297-4ee8-a037-68b9d9e13eb8	NA	6.739
adrenal	primary_cancer	TCGA-QT-A5XO-01A-11R-A35K-07	Pheochromocytoma and Paraganglioma	c3ff9063-fcc5-4d2f-9328-dc71d1f232d6	NA	28.544
adrenal	primary_cancer	TCGA-QR-A6ZZ-01A-11R-A35K-07	Pheochromocytoma and Paraganglioma	ffe5c342-c91a-46da-8cf3-0a86b9ca9608	NA	5.641
adrenal	primary_cancer	TCGA-OR-A5LK-01A-11R-A29S-07	Adrenocortical carcinoma	6bce4f20-babf-4cbd-a962-6b977986e19d	NA	0.084
adrenal	primary_cancer	TCGA-SA-A6C2-01A-11R-A35L-07	Pheochromocytoma and Paraganglioma	6459fde3-b0b0-4b97-bdb3-06ea4b9a3451	NA	34.412
adrenal	primary_cancer	TCGA-QR-A70G-01B-11R-A35K-07	Pheochromocytoma and Paraganglioma	961e1a4e-9e7f-4d2a-a090-50d9457a218b	NA	20.312
adrenal	primary_cancer	TCGA-SR-A6MS-01A-11R-A35L-07	Pheochromocytoma and Paraganglioma	d3528468-9e9d-4ff1-b4fd-07ea0694670f	NA	1.478
adrenal	primary_cancer	TCGA-OR-A5JK-01A-11R-A29S-07	Adrenocortical carcinoma	db5bc4cb-f0bc-4c26-bd11-1bf918466263	NA	0.067
adrenal	primary_cancer	TCGA-W2-A7HH-01A-11R-A35L-07	Pheochromocytoma and Paraganglioma	f788beee-beb2-442a-9a18-e5674e889707	NA	30.733
biliary	primary_cancer	TCGA-3X-AAV9-01A-72R-A41I-07	Cholangiocarcinoma	59012a78-0e8f-4b99-af97-0dbb1d3d0513	NA	4.033
biliary	primary_cancer	TCGA-3X-AAVE-01A-11R-A41I-07	Cholangiocarcinoma	c49a7f2a-f7ef-419d-829a-0b3a9f915aad	NA	2.881
biliary	primary_cancer	TCGA-W5-AA2H-01A-31R-A41I-07	Cholangiocarcinoma	b0ada585-0834-406b-b02c-b06c171882ff	NA	1.674
biliary	primary_cancer	TCGA-ZH-A8Y4-01A-11R-A41I-07	Cholangiocarcinoma	012cd145-9f6c-4b79-b929-3f42f61e3dce	NA	2.251
biliary	primary_cancer	TCGA-ZH-A8Y6-01A-11R-A41I-07	Cholangiocarcinoma	f322aedd-a561-4b14-b2e3-f60087b705f7	NA	5.394
biliary	primary_cancer	TCGA-W5-AA2T-01A-12R-A41I-07	Cholangiocarcinoma	d6580402-f691-479a-8b3c-582547b22b0c	NA	4.37
biliary	primary_cancer	TCGA-W5-AA39-01A-11R-A41I-07	Cholangiocarcinoma	342a4721-d5b0-487f-a2a7-a8ef6b7a924c	NA	0.225
biliary	primary_cancer	TCGA-ZD-A8I3-01A-11R-A41I-07	Cholangiocarcinoma	be89bf4d-75f7-4596-9251-490976f7e254	NA	5.426
biliary	primary_cancer	TCGA-ZH-A8Y1-01A-11R-A41I-07	Cholangiocarcinoma	11aba6d6-271d-4d59-a2be-8cbd88a48d40	NA	6.424
biliary	primary_cancer	TCGA-4G-AAZT-01A-11R-A41I-07	Cholangiocarcinoma	355d81ff-9689-4301-bd41-3df7403b533c	NA	2.364
biliary	primary_cancer	TCGA-4G-AAZO-01A-12R-A41I-07	Cholangiocarcinoma	f36ef26a-5c56-422b-bcdf-4693615d026b	NA	0.906
biliary	primary_cancer	TCGA-3X-AAVB-01A-31R-A41I-07	Cholangiocarcinoma	88336d42-a31c-448f-a077-2608786c80fe	NA	2.375
biliary	primary_cancer	TCGA-W5-AA2W-01A-11R-A41I-07	Cholangiocarcinoma	6fcc3918-f4b0-42ab-b00c-027175606cbd	NA	2.869
biliary	primary_cancer	TCGA-W5-AA2X-01A-11R-A41I-07	Cholangiocarcinoma	1d507dd2-bb72-4305-a858-68fccae00d5e	NA	1.526
biliary	primary_cancer	TCGA-ZH-A8Y5-01A-11R-A41I-07	Cholangiocarcinoma	f7f581cf-3c93-4eaf-9f10-299006f058ce	NA	5.197
biliary	primary_cancer	TCGA-W5-AA30-01A-31R-A41I-07	Cholangiocarcinoma	f53d3bb4-4d10-4321-b41b-87fed60e6fc1	NA	3.362
biliary	primary_cancer	TCGA-W5-AA2Q-01A-11R-A41I-07	Cholangiocarcinoma	60f80712-30c2-4026-9853-9733f641c05f	NA	5.577
biliary	primary_cancer	TCGA-W5-AA2G-01A-11R-A41I-07	Cholangiocarcinoma	0431cd43-2dd6-4319-8017-6ed8b8e77dc0	NA	2.673
biliary	primary_cancer	TCGA-W5-AA2O-01A-11R-A41I-07	Cholangiocarcinoma	0e8deabe-78a0-4960-8dc0-1afb483f409d	NA	1.184
biliary	primary_cancer	TCGA-W5-AA2R-01A-11R-A41I-07	Cholangiocarcinoma	d3b1d5c8-a823-4630-a160-599bc0d5fb9a	NA	12.497
biliary	primary_cancer	TCGA-ZH-A8Y2-01A-11R-A41I-07	Cholangiocarcinoma	63a3bd41-6a68-4eb5-ad4f-0fd05be97ac1	NA	1.814
biliary	primary_cancer	TCGA-ZU-A8S4-01A-11R-A41I-07	Cholangiocarcinoma	5cd9444b-4c4c-489a-b491-583da5510c80	NA	0.911
biliary	primary_cancer	TCGA-3X-AAVC-01A-21R-A41I-07	Cholangiocarcinoma	8c8d5e98-023b-4496-a237-2632c609f627	NA	0.311
biliary	primary_cancer	TCGA-3X-AAVA-01A-11R-A41I-07	Cholangiocarcinoma	6a8ffc5d-444e-4864-bafd-ddf1ef900ef0	NA	1.695
biliary	primary_cancer	TCGA-W5-AA2U-01A-11R-A41I-07	Cholangiocarcinoma	41df36db-590f-4410-8d1d-b9afbbc9cecc	NA	2.174
biliary	primary_cancer	TCGA-W5-AA36-01A-11R-A41I-07	Cholangiocarcinoma	b8dabef1-a207-4c40-bf80-d61ad7dbf571	NA	0.942
biliary	primary_cancer	TCGA-W6-AA0S-01A-11R-A41I-07	Cholangiocarcinoma	f5475a42-4520-4124-9ace-8c0ed9eabefb	NA	0.641
biliary	primary_cancer	TCGA-ZH-A8Y8-01A-51R-A41I-07	Cholangiocarcinoma	6d6c5a87-0773-418f-ae97-52e1cec8b8b1	NA	1.913
biliary	primary_cancer	TCGA-W5-AA2I-01A-32R-A41I-07	Cholangiocarcinoma	51dfbd25-fa30-4ac5-b375-fde6ddbaa151	NA	5.446
biliary	primary_cancer	TCGA-W5-AA31-01A-11R-A41I-07	Cholangiocarcinoma	b4468779-3068-40d2-809c-7b513d0a752f	NA	5.307
biliary	primary_cancer	TCGA-W5-AA2Z-01A-11R-A41I-07	Cholangiocarcinoma	df40ecd0-42b7-45be-9789-098cc3c85f34	NA	11.413
biliary	primary_cancer	TCGA-WD-A7RX-01A-12R-A41I-07	Cholangiocarcinoma	015b2409-ca2e-4141-8266-fe619793761c	NA	4.677
biliary	primary_cancer	TCGA-YR-A95A-01A-12R-A41I-07	Cholangiocarcinoma	7bb15e31-2b7d-4926-b78a-0d2aa7bddd78	NA	3.283
biliary	primary_cancer	TCGA-W5-AA38-01A-11R-A41I-07	Cholangiocarcinoma	cf410999-4cac-4f7b-9062-bfd807c50355	NA	2.64
biliary	primary_cancer	TCGA-W5-AA33-01A-11R-A41I-07	Cholangiocarcinoma	e67b53ac-771f-4b92-aad8-da78c97f4bcb	NA	8.67
biliary	primary_cancer	TCGA-W5-AA34-01A-11R-A41I-07	Cholangiocarcinoma	84e6718b-08c9-475d-906d-045e8f5477a0	NA	7.715
bladder_urothelial	primary_cancer	TCGA-UY-A9PF-01A-11R-A38B-07	Bladder Urothelial Carcinoma	6f82f237-061e-47ae-a3fa-d03b6aeb1c1b	NA	0.894
bladder_urothelial	primary_cancer	TCGA-GC-A3RB-01A-12R-A220-07	Bladder Urothelial Carcinoma	5676c0ee-c460-492c-bf00-73d5ddb1d647	NA	2.099
bladder_urothelial	primary_cancer	TCGA-CF-A47S-01A-11R-A23W-07	Bladder Urothelial Carcinoma	5eb594ca-ba46-45d2-8532-0fabac564e34	NA	5.96
bladder_urothelial	primary_cancer	TCGA-FD-A62P-01A-32R-A30C-07	Bladder Urothelial Carcinoma	4a0b6e3c-a167-4ca6-876b-6fb82fa8fdb6	NA	2.834
bladder_urothelial	primary_cancer	TCGA-GC-A3RC-01A-11R-A22U-07	Bladder Urothelial Carcinoma	3208f694-4779-4548-8cb4-74df829b3345	NA	0.193
bladder_urothelial	primary_cancer	TCGA-GU-A42Q-01A-11R-A23W-07	Bladder Urothelial Carcinoma	7668e1a3-cf31-411a-8bce-aff592a0f053	NA	1.237
bladder_urothelial	primary_cancer	TCGA-DK-AA6P-01A-11R-A39I-07	Bladder Urothelial Carcinoma	c048b775-7679-424f-a008-8f7def9c0523	NA	4.963
bladder_urothelial	primary_cancer	TCGA-XF-A9SP-01A-11R-A39I-07	Bladder Urothelial Carcinoma	f279c9db-8b02-4df1-883c-28373ec10636	NA	3.404
bladder_urothelial	primary_cancer	TCGA-XF-A9T3-01A-11R-A42T-07	Bladder Urothelial Carcinoma	2dd4a5e0-3008-4615-bcc5-9cc8d9a708b2	NA	1.704
bladder_urothelial	primary_cancer	TCGA-XF-AAN7-01A-11R-A42T-07	Bladder Urothelial Carcinoma	9e523e29-ea79-4124-97b4-d9c8686b3ddc	NA	16.834
bladder_urothelial	primary_cancer	TCGA-C4-A0EZ-01A-21R-A24X-07	Bladder Urothelial Carcinoma	8f482c29-37fe-400f-b178-224765a0c037	NA	38.843
bladder_urothelial	primary_cancer	TCGA-UY-A78O-01A-12R-A33J-07	Bladder Urothelial Carcinoma	2480ce78-21a7-4717-8b08-8176d9fe6834	NA	7.31
bladder_urothelial	primary_cancer	TCGA-GV-A40E-01A-12R-A23N-07	Bladder Urothelial Carcinoma	221bd562-e77d-4374-9491-efb5c3b026c3	NA	1.734
bladder_urothelial	primary_cancer	TCGA-ZF-AA5P-01A-11R-A39I-07	Bladder Urothelial Carcinoma	8612349c-596c-4938-92c8-79b8919f5bd6	NA	4.67
bladder_urothelial	primary_cancer	TCGA-4Z-AA87-01A-11R-A39I-07	Bladder Urothelial Carcinoma	3ae4a552-7df5-4a6b-a9c6-069cc96e7448	NA	5.088
bladder_urothelial	primary_cancer	TCGA-XF-A9SW-01A-11R-A42T-07	Bladder Urothelial Carcinoma	519498f2-999e-4b9c-980c-b83ec3828186	NA	6.345
bladder_urothelial	primary_cancer	TCGA-4Z-AA89-01A-11R-A39I-07	Bladder Urothelial Carcinoma	88cb8b2c-9d76-4b91-bbca-5e62e251e3d6	NA	1.963
bladder_urothelial	primary_cancer	TCGA-E7-A4IJ-01A-31R-A26T-07	Bladder Urothelial Carcinoma	21c8f741-963f-463e-ac5b-1c2c1aa9d8cb	NA	3.657
bladder_urothelial	primary_cancer	TCGA-FD-A62N-01A-11R-A30C-07	Bladder Urothelial Carcinoma	d68e2da7-7bd4-4510-8751-02e9f16ad4e6	NA	0.667
bladder_urothelial	primary_cancer	TCGA-GU-A766-01A-11R-A32O-07	Bladder Urothelial Carcinoma	d6280a13-a376-4ede-8aab-7a7633cb3b9e	NA	0.661
bladder_urothelial	primary_cancer	TCGA-FD-A3NA-01A-11R-A21D-07	Bladder Urothelial Carcinoma	bb0c2732-5fb4-44e7-bc62-a645cf1c1a56	NA	2.836
bladder_urothelial	primary_cancer	TCGA-ZF-A9RE-01A-11R-A38B-07	Bladder Urothelial Carcinoma	2c9b61fa-9d26-41fe-9d79-a34bd08182f1	NA	1.638
bladder_urothelial	primary_cancer	TCGA-C4-A0F1-01A-11R-A034-07	Bladder Urothelial Carcinoma	791dd985-420e-46a0-a770-ebaf0d2beaf1	NA	0.474
bladder_urothelial	primary_cancer	TCGA-UY-A8OB-01A-12R-A42T-07	Bladder Urothelial Carcinoma	fb37dcdd-00a6-49b7-b0ca-1fe0d9c4782a	NA	0.07
bladder_urothelial	primary_cancer	TCGA-FD-A3B6-01A-21R-A20F-07	Bladder Urothelial Carcinoma	1a1e861c-14bd-45ea-904a-b14d4059ac95	NA	0.689
bladder_urothelial	primary_cancer	TCGA-DK-A3IK-01A-32R-A21D-07	Bladder Urothelial Carcinoma	42db28fc-4d5f-4b0f-aa86-7d27197c7649	NA	1.57
bladder_urothelial	primary_cancer	TCGA-GC-A6I1-01A-12R-A31N-07	Bladder Urothelial Carcinoma	159e6f18-943e-4e7b-af13-da273c52dc16	NA	0.123
bladder_urothelial	primary_cancer	TCGA-G2-A2EF-01A-12R-A18C-07	Bladder Urothelial Carcinoma	4000adba-115e-40bf-afbb-35ad20c4e416	NA	0.929
bladder_urothelial	primary_cancer	TCGA-ZF-AA4X-01A-11R-A38B-07	Bladder Urothelial Carcinoma	1dac1d16-2bc6-44db-b05a-30e8f2fb703f	NA	7.874
bladder_urothelial	primary_cancer	TCGA-BT-A0YX-01A-11R-A10U-07	Bladder Urothelial Carcinoma	2f3c17f6-be91-4195-9aa7-e02298d118f3	NA	0.364
bladder_urothelial	primary_cancer	TCGA-FD-A5BV-01A-11R-A26T-07	Bladder Urothelial Carcinoma	72ea067a-e5ae-43f3-97b8-2283b35df8d6	NA	0.945
bladder_urothelial	primary_cancer	TCGA-4Z-AA81-01A-11R-A39I-07	Bladder Urothelial Carcinoma	db105bbd-3501-4916-b032-dd3480038d55	NA	0.137
bladder_urothelial	primary_cancer	TCGA-DK-A1A3-01A-11R-A13Y-07	Bladder Urothelial Carcinoma	d22b6ef3-9b08-44d9-b37f-e7f61ce89404	NA	1.969
bladder_urothelial	primary_cancer	TCGA-XF-A8HH-01A-11R-A38B-07	Bladder Urothelial Carcinoma	d9f01cb3-7b78-4330-9a2c-5923cdbfa142	NA	2.627
bladder_urothelial	primary_cancer	TCGA-FD-A6TK-01A-42R-A33J-07	Bladder Urothelial Carcinoma	842484b0-6661-4dc2-bf70-b1216ab05475	NA	0.843
bladder_urothelial	primary_cancer	TCGA-CU-A72E-01A-12R-A33J-07	Bladder Urothelial Carcinoma	69b30673-9ec0-4c05-b75c-12bcb1f7268f	NA	0.561
bladder_urothelial	primary_cancer	TCGA-CF-A8HX-01A-11R-A36F-07	Bladder Urothelial Carcinoma	eb31b7b3-ef3c-4ad9-a9e8-47b85753e2d6	NA	1.921
bladder_urothelial	primary_cancer	TCGA-FJ-A3Z7-01A-12R-A23N-07	Bladder Urothelial Carcinoma	8c79f5ec-ce4f-4c86-8d1c-71495c276d74	NA	1.194
bladder_urothelial	primary_cancer	TCGA-GC-A3BM-01A-11R-A22U-07	Bladder Urothelial Carcinoma	8f7b5e84-55c2-4f98-a6a2-56b862161a98	NA	2.645
bladder_urothelial	primary_cancer	TCGA-FD-A3SL-01A-21R-A22U-07	Bladder Urothelial Carcinoma	d692892d-d63b-4ac2-9627-ae255ab17cab	NA	1.492
bladder_urothelial	primary_cancer	TCGA-FD-A3SN-01A-12R-A22U-07	Bladder Urothelial Carcinoma	41836f0e-f807-4afa-ae39-c0eb16fa6b54	NA	2.733
bladder_urothelial	primary_cancer	TCGA-GC-A6I3-01A-11R-A31N-07	Bladder Urothelial Carcinoma	b660dd38-f986-4143-9445-b66cb60f42dd	NA	1.78
bladder_urothelial	primary_cancer	TCGA-ZF-AA53-01A-11R-A39I-07	Bladder Urothelial Carcinoma	97d051a1-0b25-45eb-a9ac-c2006d89752e	NA	0.508
bladder_urothelial	primary_cancer	TCGA-G2-A2EC-01A-11R-A180-07	Bladder Urothelial Carcinoma	61a9951d-6005-4d5a-a7ac-1146399de61c	NA	4.563
bladder_urothelial	primary_cancer	TCGA-K4-A54R-01A-11R-A26T-07	Bladder Urothelial Carcinoma	e9acf520-2eb5-4b29-84c8-10ae6c5919e7	NA	5.19
bladder_urothelial	primary_cancer	TCGA-G2-A3IB-01A-11R-A20F-07	Bladder Urothelial Carcinoma	df755d45-141e-40d1-96c8-6bfe29c17edc	NA	0.071
bladder_urothelial	primary_cancer	TCGA-K4-A3WU-01B-11R-A23N-07	Bladder Urothelial Carcinoma	6c392517-fe3d-4d86-8397-c08734fe20cc	NA	3.656
bladder_urothelial	primary_cancer	TCGA-K4-A5RH-01A-11R-A30C-07	Bladder Urothelial Carcinoma	a83e6d94-8bef-4ffe-889a-2eecc4b97cae	NA	30.352
bladder_urothelial	primary_cancer	TCGA-FD-A3SO-01A-11R-A22U-07	Bladder Urothelial Carcinoma	bd1ba628-0cb5-4103-baa4-3f430d24d359	NA	0.895
bladder_urothelial	primary_cancer	TCGA-XF-A9SV-01A-21R-A42T-07	Bladder Urothelial Carcinoma	d855e064-11e2-436f-8433-b114b4709247	NA	0.793
bladder_urothelial	primary_cancer	TCGA-C4-A0F7-01A-11R-A084-07	Bladder Urothelial Carcinoma	c0ccb685-0789-4559-9189-05b841173aff	NA	2.668
bladder_urothelial	primary_cancer	TCGA-HQ-A5NE-01A-12R-A28M-07	Bladder Urothelial Carcinoma	6621636c-4a29-4ad3-99bc-406b1820d063	NA	0.744
bladder_urothelial	primary_cancer	TCGA-4Z-AA7R-01A-11R-A39I-07	Bladder Urothelial Carcinoma	eac6c8bf-f85e-4eb7-a700-034cd91722d7	NA	9.877
bladder_urothelial	primary_cancer	TCGA-CF-A47Y-01A-11R-A23W-07	Bladder Urothelial Carcinoma	0c1e7ecc-d20d-4047-8419-6347537cb8a3	NA	1.695
bladder_urothelial	primary_cancer	TCGA-FD-A6TG-01A-11R-A32O-07	Bladder Urothelial Carcinoma	088b27e8-38f6-41ff-a861-d371415fd7f0	NA	3.113
bladder_urothelial	primary_cancer	TCGA-UY-A78P-01A-12R-A36F-07	Bladder Urothelial Carcinoma	500beee6-a0cf-44aa-9102-de22b7210aba	NA	0.385
bladder_urothelial	primary_cancer	TCGA-BL-A13I-01A-11R-A13Y-07	Bladder Urothelial Carcinoma	c270c34c-0cfd-410e-ab3c-231033196d25	NA	0.845
bladder_urothelial	primary_cancer	TCGA-E7-A6MF-01A-12R-A32O-07	Bladder Urothelial Carcinoma	791bcd93-c949-49b3-aaa4-4c8af82f5ec1	NA	11.582
bladder_urothelial	primary_cancer	TCGA-BL-A13J-01B-04R-A277-07	Bladder Urothelial Carcinoma	cd889d58-7d2f-4c0a-8252-de3c6f056333	NA	1.067
bladder_urothelial	primary_cancer	TCGA-UY-A9PA-01A-11R-A38B-07	Bladder Urothelial Carcinoma	c2a2d7ab-c8d6-4481-9e91-1f16969e8105	NA	1.612
bladder_urothelial	primary_cancer	TCGA-CF-A47W-01A-11R-A23W-07	Bladder Urothelial Carcinoma	cbc4cdac-a504-47ed-96cf-5c459f7febd0	NA	2.842
bladder_urothelial	primary_cancer	TCGA-XF-A9T2-01A-11R-A42T-07	Bladder Urothelial Carcinoma	5ca8593d-7217-476e-ae05-aa22fd11c332	NA	0.91
bladder_urothelial	primary_cancer	TCGA-DK-A2HX-01A-12R-A18C-07	Bladder Urothelial Carcinoma	518085b3-f993-4346-bb4d-b7244e9435d6	NA	3.395
bladder_urothelial	primary_cancer	TCGA-XF-A9SZ-01A-11R-A39I-07	Bladder Urothelial Carcinoma	73a57b9f-d780-4556-bf25-b75c2f75340e	NA	1.199
bladder_urothelial	primary_cancer	TCGA-G2-A3IE-01A-11R-A20F-07	Bladder Urothelial Carcinoma	eb59f0f9-3b20-4dce-833e-6a67076ddc01	NA	7.804
bladder_urothelial	primary_cancer	TCGA-GV-A3JW-01A-11R-A20F-07	Bladder Urothelial Carcinoma	57eda6ed-26b0-4bf6-98ad-80f4872b9832	NA	2.435
bladder_urothelial	primary_cancer	TCGA-XF-A8HC-01A-11R-A36F-07	Bladder Urothelial Carcinoma	bd8b95cf-34c9-4bc1-98fd-6c7e1c20680b	NA	4.169
bladder_urothelial	primary_cancer	TCGA-XF-A9T5-01A-11R-A42T-07	Bladder Urothelial Carcinoma	a126ebd8-a7e3-4ea6-92a4-cf8a3a99b19b	NA	1.385
bladder_urothelial	primary_cancer	TCGA-4Z-AA7N-01A-11R-A39I-07	Bladder Urothelial Carcinoma	45517ca1-d687-4f8a-90e4-0b3937221a00	NA	1.028
bladder_urothelial	primary_cancer	TCGA-CU-A3QU-01A-11R-A22U-07	Bladder Urothelial Carcinoma	c40ff5cd-bffa-40c4-a192-9830b0da3daa	NA	3.583
bladder_urothelial	primary_cancer	TCGA-PQ-A6FN-01A-11R-A31N-07	Bladder Urothelial Carcinoma	3167baad-cb92-49e6-8a7d-c59f81709a52	NA	0.348
bladder_urothelial	primary_cancer	TCGA-ZF-A9RF-01A-11R-A38B-07	Bladder Urothelial Carcinoma	56907638-5828-4ad8-9be9-a6cf5aa90f7b	NA	9.355
bladder_urothelial	primary_cancer	TCGA-YC-A9TC-01A-22R-A39I-07	Bladder Urothelial Carcinoma	86fcf82f-c97c-4f01-998d-8e6f389438d5	NA	4.131
bladder_urothelial	primary_cancer	TCGA-4Z-AA7W-01A-11R-A39I-07	Bladder Urothelial Carcinoma	20c1d8e8-3bb4-4d6b-ae70-659cf0ea07de	NA	0.053
bladder_urothelial	primary_cancer	TCGA-FD-A43N-01A-11R-A23W-07	Bladder Urothelial Carcinoma	043d2756-1abf-411f-aaac-b448ed088be1	NA	5.08
bladder_urothelial	primary_cancer	TCGA-H4-A2HQ-01A-11R-A180-07	Bladder Urothelial Carcinoma	2c681223-21a5-4c58-acbb-2d51516bff12	NA	4.524
bladder_urothelial	primary_cancer	TCGA-CF-A5U8-01A-11R-A28M-07	Bladder Urothelial Carcinoma	58e49daa-eced-4ca8-af92-98af61f8b6f1	NA	1.835
bladder_urothelial	primary_cancer	TCGA-XF-A8HB-01A-11R-A36F-07	Bladder Urothelial Carcinoma	7bee34e3-b559-48e9-bbc3-2d162b8f128a	NA	2.392
bladder_urothelial	primary_cancer	TCGA-BL-A0C8-01B-04R-A277-07	Bladder Urothelial Carcinoma	0c879828-5cfa-4b58-805e-0a1f78fc8fe7	NA	2.592
bladder_urothelial	primary_cancer	TCGA-CF-A47T-01A-11R-A23W-07	Bladder Urothelial Carcinoma	fc2ec949-9292-4709-b0ea-37368add311d	NA	2.705
bladder_urothelial	primary_cancer	TCGA-KQ-A41N-01A-11R-A33J-07	Bladder Urothelial Carcinoma	2d83d812-8f9b-443b-8643-dd3104b5068e	NA	1.267
bladder_urothelial	primary_cancer	TCGA-XF-A8HI-01A-11R-A38B-07	Bladder Urothelial Carcinoma	9bd649f6-9b08-4d26-87b9-a6901a00f2ba	NA	2.371
bladder_urothelial	primary_cancer	TCGA-ZF-AA4U-01A-11R-A38B-07	Bladder Urothelial Carcinoma	842be247-70f7-4ac6-9e16-c07a1f62ff78	NA	1.708
bladder_urothelial	primary_cancer	TCGA-BL-A13J-01A-11R-A10U-07	Bladder Urothelial Carcinoma	3c499f07-67e2-4032-a0b5-b9edd90035f7	NA	2.225
bladder_urothelial	primary_cancer	TCGA-FD-A5C0-01A-11R-A28M-07	Bladder Urothelial Carcinoma	7773fd96-8ab7-417b-befd-ea63dc596a7a	NA	1.803
bladder_urothelial	primary_cancer	TCGA-E7-A8O8-01A-11R-A36F-07	Bladder Urothelial Carcinoma	a77cf51f-45de-4a5b-a6ca-6773f8e236d2	NA	0.795
bladder_urothelial	primary_cancer	TCGA-GC-A3I6-01A-11R-A20F-07	Bladder Urothelial Carcinoma	652f8ab9-33b6-4e10-a84e-1e1b1ef0b707	NA	2.274
bladder_urothelial	primary_cancer	TCGA-GD-A2C5-01A-12R-A180-07	Bladder Urothelial Carcinoma	b8ecfb28-27d0-4ad4-b73c-cc21be41af31	NA	0.922
bladder_urothelial	primary_cancer	TCGA-BT-A3PH-01A-11R-A220-07	Bladder Urothelial Carcinoma	b290727b-23ed-4e73-9071-cf2c06671430	NA	1.778
bladder_urothelial	primary_cancer	TCGA-BT-A2LB-01A-11R-A18C-07	Bladder Urothelial Carcinoma	b6a8b608-8bf6-4d57-a720-bd4aaced4591	NA	1.279
bladder_urothelial	primary_cancer	TCGA-DK-AA75-01A-11R-A39I-07	Bladder Urothelial Carcinoma	8ac289ba-c81f-44ed-9fb4-8c2af9eccdb0	NA	8.734
bladder_urothelial	primary_cancer	TCGA-GU-AATP-01A-11R-A39I-07	Bladder Urothelial Carcinoma	6f3b244b-47b9-4af4-85c5-0051f6688aa8	NA	1.57
bladder_urothelial	primary_cancer	TCGA-GD-A3OS-01A-12R-A220-07	Bladder Urothelial Carcinoma	80b2573f-d8e0-4d0d-84a6-301c5103267d	NA	13.962
bladder_urothelial	primary_cancer	TCGA-MV-A51V-01A-11R-A26T-07	Bladder Urothelial Carcinoma	4c8aa0aa-c1ae-4aff-96f2-4636bb1d5c47	NA	1.369
bladder_urothelial	primary_cancer	TCGA-E7-A5KE-01A-11R-A28M-07	Bladder Urothelial Carcinoma	4be53c32-b222-44dd-b0b9-6a935591380a	NA	5.2
bladder_urothelial	primary_cancer	TCGA-GV-A3JZ-01A-11R-A21D-07	Bladder Urothelial Carcinoma	f3872d71-1889-4756-bdb4-d5ae383758a8	NA	11.638
bladder_urothelial	primary_cancer	TCGA-UY-A9PE-01A-11R-A38B-07	Bladder Urothelial Carcinoma	394c0fda-d609-4a29-a758-c3b984e50d1d	NA	1.238
bladder_urothelial	primary_cancer	TCGA-BT-A2LA-01A-11R-A18C-07	Bladder Urothelial Carcinoma	312ea080-3831-453d-aa8c-e466192c8309	NA	25.874
bladder_urothelial	primary_cancer	TCGA-E7-A97P-01A-11R-A38B-07	Bladder Urothelial Carcinoma	f2282782-43ba-47a5-abba-1f412a2fc535	NA	1.035
bladder_urothelial	primary_cancer	TCGA-CF-A3MF-01A-12R-A21D-07	Bladder Urothelial Carcinoma	429f0e9d-c160-4b36-a31b-dab1097c6129	NA	0.357
bladder_urothelial	primary_cancer	TCGA-G2-AA3C-01A-21R-A39I-07	Bladder Urothelial Carcinoma	9192d03e-87ee-424a-90fa-7e66c3b6abe3	NA	0.503
bladder_urothelial	primary_cancer	TCGA-2F-A9KT-01A-11R-A38B-07	Bladder Urothelial Carcinoma	406a8f7c-1530-4ecf-95b0-b051d9a3184d	NA	3.172
bladder_urothelial	primary_cancer	TCGA-LT-A8JT-01A-11R-A36F-07	Bladder Urothelial Carcinoma	85f596e4-9591-49f5-8408-25e4ce16c7f7	NA	1.93
bladder_urothelial	primary_cancer	TCGA-DK-A3IT-01A-31R-A20F-07	Bladder Urothelial Carcinoma	e33ab42a-bfb3-4923-a305-a6babcee61f4	NA	2.106
bladder_urothelial	primary_cancer	TCGA-ZF-A9R1-01A-11R-A39I-07	Bladder Urothelial Carcinoma	c720ac3f-9cb8-4a5c-aa7a-0fb852e11360	NA	0.917
bladder_urothelial	primary_cancer	TCGA-BT-A20O-01A-21R-A14Y-07	Bladder Urothelial Carcinoma	cfb10485-b097-4470-bd7e-5ed2abd2e8ac	NA	2.265
bladder_urothelial	primary_cancer	TCGA-K4-A83P-01A-11R-A352-07	Bladder Urothelial Carcinoma	b19c4e9c-2caf-436b-b728-9849b668c663	NA	2.238
bladder_urothelial	primary_cancer	TCGA-XF-AAN8-01A-11R-A42T-07	Bladder Urothelial Carcinoma	6d466393-6b0c-4624-b385-5d689695de6b	NA	1.794
bladder_urothelial	primary_cancer	TCGA-CF-A1HR-01A-11R-A13Y-07	Bladder Urothelial Carcinoma	c11e3246-c33d-47ef-b4b4-be287b92d91e	NA	1.904
bladder_urothelial	primary_cancer	TCGA-GD-A3OQ-01A-32R-A220-07	Bladder Urothelial Carcinoma	61b0add8-ad93-4f2a-a95b-fa257934962f	NA	0.663
bladder_urothelial	primary_cancer	TCGA-E5-A4U1-01A-11R-A31N-07	Bladder Urothelial Carcinoma	fee1bb5e-af08-43f5-a313-ebe56ceb6a37	NA	3.149
bladder_urothelial	primary_cancer	TCGA-ZF-A9R0-01A-11R-A38B-07	Bladder Urothelial Carcinoma	d3eb9aa5-5e03-4c8d-88be-461184059d53	NA	0.742
bladder_urothelial	primary_cancer	TCGA-GV-A3JX-01A-11R-A20F-07	Bladder Urothelial Carcinoma	388f02e0-68bb-4be2-9271-60a42d3a3e9d	NA	7.964
bladder_urothelial	primary_cancer	TCGA-2F-A9KO-01A-11R-A38B-07	Bladder Urothelial Carcinoma	689c1593-3903-4c82-9cb1-1471d8bca178	NA	2.17
bladder_urothelial	primary_cancer	TCGA-CF-A9FL-01A-11R-A38B-07	Bladder Urothelial Carcinoma	718250e5-65a4-4365-8e2e-3dd4966c4fc6	NA	1.865
bladder_urothelial	primary_cancer	TCGA-E7-A519-01A-11R-A26T-07	Bladder Urothelial Carcinoma	f11c2ee8-9bf1-4a41-b154-7fb31af15298	NA	1.382
bladder_urothelial	primary_cancer	TCGA-ZF-A9RL-01A-11R-A38B-07	Bladder Urothelial Carcinoma	e15e8747-ff36-464a-bfc1-2909a23bd0a3	NA	14.956
bladder_urothelial	primary_cancer	TCGA-KQ-A41S-01A-12R-A33J-07	Bladder Urothelial Carcinoma	ed8b8326-fa77-4e72-b146-49c0543a5792	NA	4.268
bladder_urothelial	primary_cancer	TCGA-FD-A6TI-01A-11R-A32O-07	Bladder Urothelial Carcinoma	c1ce17a6-3e8b-41b7-97bc-9213b352ce84	NA	0.418
bladder_urothelial	primary_cancer	TCGA-GD-A76B-01A-11R-A32O-07	Bladder Urothelial Carcinoma	227c6e50-7801-4fb6-91d3-eda4313024bb	NA	0.607
bladder_urothelial	primary_cancer	TCGA-FD-A6TH-01A-11R-A32O-07	Bladder Urothelial Carcinoma	e71db8e9-8ee2-46dc-935a-3274f1fab863	NA	1.089
bladder_urothelial	primary_cancer	TCGA-E7-A6ME-01A-22R-A32O-07	Bladder Urothelial Carcinoma	dfffbe9c-c83a-4087-a3f7-2be3d63a2eaa	NA	14.99
bladder_urothelial	primary_cancer	TCGA-FD-A3B8-01A-31R-A20F-07	Bladder Urothelial Carcinoma	a45e5587-488f-4348-a724-fe64e0c5be7d	NA	2.972
bladder_urothelial	primary_cancer	TCGA-XF-A8HG-01A-11R-A36F-07	Bladder Urothelial Carcinoma	79b6d16e-cc87-416d-8440-2aa9ad3ed3d3	NA	0.572
bladder_urothelial	primary_cancer	TCGA-E5-A4TZ-01A-11R-A31N-07	Bladder Urothelial Carcinoma	b7290db7-112b-494e-80f7-bb05860f6c7e	NA	2.746
bladder_urothelial	primary_cancer	TCGA-DK-A1AD-01A-11R-A13Y-07	Bladder Urothelial Carcinoma	6491f391-9704-4249-bc81-d712e755ec74	NA	1.824
bladder_urothelial	primary_cancer	TCGA-H4-A2HO-01A-11R-A180-07	Bladder Urothelial Carcinoma	eb5b988d-308e-4afb-b21b-8bdd45010c72	NA	0.34
bladder_urothelial	primary_cancer	TCGA-BT-A20X-01A-11R-A16R-07	Bladder Urothelial Carcinoma	b3797921-4b9a-43c4-8904-6fb80fc80c08	NA	0.37
bladder_urothelial	primary_cancer	TCGA-XF-AAMQ-01A-11R-A42T-07	Bladder Urothelial Carcinoma	ab8a3b08-8687-42c2-9c03-ae6691e8a183	NA	17.77
bladder_urothelial	primary_cancer	TCGA-4Z-AA83-01A-11R-A39I-07	Bladder Urothelial Carcinoma	ede7cca5-c3f8-43e0-9354-b99821de60c0	NA	0.197
bladder_urothelial	primary_cancer	TCGA-XF-A9T4-01A-11R-A39I-07	Bladder Urothelial Carcinoma	3a644871-42e4-44b0-901e-512596a018b1	NA	2.734
bladder_urothelial	primary_cancer	TCGA-KQ-A41O-01A-12R-A352-07	Bladder Urothelial Carcinoma	728aaa87-e83d-47ff-9559-5f2de0152949	NA	1.89
bladder_urothelial	primary_cancer	TCGA-ZF-AA51-01A-21R-A39I-07	Bladder Urothelial Carcinoma	1be3a1d1-1300-4d9f-86d1-4b5faf7241fb	NA	0.998
bladder_urothelial	primary_cancer	TCGA-E7-A7XN-01A-11R-A352-07	Bladder Urothelial Carcinoma	a931a672-1565-4de6-9c64-d5a74f4cac1f	NA	0.057
bladder_urothelial	primary_cancer	TCGA-XF-A8HE-01A-11R-A36F-07	Bladder Urothelial Carcinoma	06c37fa7-a8d3-4727-ba1d-69b584b8f585	NA	0.551
bladder_urothelial	primary_cancer	TCGA-4Z-AA82-01A-11R-A39I-07	Bladder Urothelial Carcinoma	349245b6-2265-476a-845a-a7f44896cf52	NA	1.094
bladder_urothelial	primary_cancer	TCGA-XF-AAN0-01A-11R-A42T-07	Bladder Urothelial Carcinoma	ec11833d-476a-442e-82c6-f924bea495c1	NA	0.473
bladder_urothelial	primary_cancer	TCGA-XF-A9SY-01A-21R-A42T-07	Bladder Urothelial Carcinoma	1e4801e3-d021-46c7-a157-0b2a2fc59cf7	NA	0.891
bladder_urothelial	primary_cancer	TCGA-BT-A20N-01A-11R-A14Y-07	Bladder Urothelial Carcinoma	dfc4aacd-32b1-4cf8-91f9-3c865cf56ec9	NA	3.602
bladder_urothelial	primary_cancer	TCGA-5N-A9KM-01A-11R-A42T-07	Bladder Urothelial Carcinoma	d3011182-eb79-48a8-8698-f9cf8f091924	NA	4.391
bladder_urothelial	primary_cancer	TCGA-G2-AA3D-01A-11R-A39I-07	Bladder Urothelial Carcinoma	0c23ff84-4469-485b-b3fd-2298cd6c8e42	NA	0.983
bladder_urothelial	primary_cancer	TCGA-KQ-A41R-01A-21R-A352-07	Bladder Urothelial Carcinoma	9c9b4aa6-08b2-43f3-b68b-995df66c0494	NA	1.788
bladder_urothelial	primary_cancer	TCGA-HQ-A2OE-01A-11R-A206-07	Bladder Urothelial Carcinoma	eb210789-9eb4-4def-a83d-3f0254b3c6dd	NA	3.835
bladder_urothelial	primary_cancer	TCGA-GU-A767-01A-11R-A32O-07	Bladder Urothelial Carcinoma	3833acbb-2ea2-4442-90af-6b009ae2543b	NA	2.343
bladder_urothelial	primary_cancer	TCGA-BL-A0C8-01A-11R-A10U-07	Bladder Urothelial Carcinoma	12c0b9eb-97fc-4fa1-8f64-49c0e3e171a2	NA	7.134
bladder_urothelial	primary_cancer	TCGA-DK-AA6W-01A-12R-A39I-07	Bladder Urothelial Carcinoma	4d4cc53b-06d2-4baa-bf1c-03f9509e422c	NA	13.72
bladder_urothelial	primary_cancer	TCGA-4Z-AA86-01A-11R-A39I-07	Bladder Urothelial Carcinoma	7bd745b4-8009-4841-b775-1d8c4942591c	NA	0.966
bladder_urothelial	primary_cancer	TCGA-S5-A6DX-01A-11R-A31N-07	Bladder Urothelial Carcinoma	10efe18b-413b-4e57-b6e2-ce5cd2dbb839	NA	0.184
bladder_urothelial	primary_cancer	TCGA-GC-A3YS-01A-11R-A23N-07	Bladder Urothelial Carcinoma	10e3d6b9-8f72-4902-94ca-f89811b98e35	NA	2.167
bladder_urothelial	primary_cancer	TCGA-BL-A5ZZ-01A-31R-A30C-07	Bladder Urothelial Carcinoma	ac9729e9-6565-4e11-8828-ff43b752a5b6	NA	5.514
bladder_urothelial	primary_cancer	TCGA-KQ-A41P-01A-12R-A33J-07	Bladder Urothelial Carcinoma	4c23170b-a5e0-41c8-8309-a5bfb2823491	NA	3.957
bladder_urothelial	primary_cancer	TCGA-XF-AAN2-01A-11R-A42T-07	Bladder Urothelial Carcinoma	b1af0c13-8e8b-456f-9e4c-c8c22d8ac37f	NA	1.397
bladder_urothelial	primary_cancer	TCGA-CF-A47X-01A-31R-A23W-07	Bladder Urothelial Carcinoma	c27a2180-0dec-43ec-bf0f-2cb0acaea022	NA	8.618
bladder_urothelial	primary_cancer	TCGA-ZF-A9R9-01A-11R-A38B-07	Bladder Urothelial Carcinoma	d328ae95-7792-4953-a88a-f288a96c4a65	NA	1.234
bladder_urothelial	primary_cancer	TCGA-G2-A2EO-01A-11R-A180-07	Bladder Urothelial Carcinoma	91c8d1c3-1afe-4c4c-ae81-7d1f989e0139	NA	2.435
bladder_urothelial	primary_cancer	TCGA-XF-A9T0-01A-11R-A39I-07	Bladder Urothelial Carcinoma	fe25dbd6-adbf-47a3-9929-f392d5347bde	NA	1.189
bladder_urothelial	primary_cancer	TCGA-GD-A3OP-01A-21R-A220-07	Bladder Urothelial Carcinoma	c7f36dba-a507-46d3-8e68-7f98b8b645e9	NA	2.88
bladder_urothelial	primary_cancer	TCGA-CF-A47V-01A-11R-A23W-07	Bladder Urothelial Carcinoma	e43f2bcb-9ba5-4b65-9042-4d3b06224c0f	NA	6.854
bladder_urothelial	primary_cancer	TCGA-4Z-AA7O-01A-31R-A39I-07	Bladder Urothelial Carcinoma	fac0db5e-3c8c-4ca2-b119-da810af35fc7	NA	0.485
bladder_urothelial	primary_cancer	TCGA-GU-A762-01A-11R-A33J-07	Bladder Urothelial Carcinoma	fa74ebb2-007d-407a-ba07-12976b75056d	NA	0.202
bladder_urothelial	primary_cancer	TCGA-BT-A20T-01A-11R-A14Y-07	Bladder Urothelial Carcinoma	22e154de-0e3b-443b-8420-48d68d6c1ce4	NA	1.321
bladder_urothelial	primary_cancer	TCGA-4Z-AA7M-01A-11R-A39I-07	Bladder Urothelial Carcinoma	4cab604d-59f6-46d2-8c35-d3416977e313	NA	2.097
bladder_urothelial	primary_cancer	TCGA-E7-A6MD-01A-41R-A352-07	Bladder Urothelial Carcinoma	bf6f4d8e-7aa4-42ae-961d-4686984fc871	NA	1.22
bladder_urothelial	primary_cancer	TCGA-XF-AAMR-01A-31R-A42T-07	Bladder Urothelial Carcinoma	19823203-33ed-4c89-a8af-611ad1e95f8a	NA	4.349
bladder_urothelial	primary_cancer	TCGA-DK-A3IV-01A-22R-A21D-07	Bladder Urothelial Carcinoma	70c7f658-5208-4b3f-9767-27a3b06b8ddc	NA	2.836
bladder_urothelial	primary_cancer	TCGA-FD-A6TA-01A-12R-A33J-07	Bladder Urothelial Carcinoma	6321d37f-3658-447d-96a4-099e8072217a	NA	1.384
bladder_urothelial	primary_cancer	TCGA-BL-A13I-01B-04R-A277-07	Bladder Urothelial Carcinoma	d42e2e38-07f6-474e-8ced-ad87b671db7c	NA	0.311
bladder_urothelial	primary_cancer	TCGA-GU-A764-01A-11R-A352-07	Bladder Urothelial Carcinoma	7fe70e80-a35e-4a3d-bfb5-e044aec3e6a2	NA	1.718
bladder_urothelial	primary_cancer	TCGA-DK-A3IN-01A-11R-A20F-07	Bladder Urothelial Carcinoma	58382a39-eb95-4cd0-ad04-48c6da4b4a56	NA	4.29
bladder_urothelial	primary_cancer	TCGA-DK-AA6M-01A-11R-A39I-07	Bladder Urothelial Carcinoma	230c9517-0296-4966-8dd7-14c062e82224	NA	1.391
bladder_urothelial	primary_cancer	TCGA-XF-AAN3-01A-11R-A42T-07	Bladder Urothelial Carcinoma	ed035849-50d7-4ce5-93fd-88a7735a8c92	NA	0.796
bladder_urothelial	primary_cancer	TCGA-HQ-A5ND-01A-11R-A26T-07	Bladder Urothelial Carcinoma	a56ef438-c2ac-4c6f-9283-59e38ba14f28	NA	0.485
bladder_urothelial	primary_cancer	TCGA-DK-A3WW-01A-22R-A23N-07	Bladder Urothelial Carcinoma	edde0611-3cdb-4f1c-a259-68cb4a905bea	NA	0.213
bladder_urothelial	primary_cancer	TCGA-DK-A1AA-01A-11R-A13Y-07	Bladder Urothelial Carcinoma	5b0896f2-8fd9-42ee-b56d-b140f8d8657e	NA	1.173
bladder_urothelial	primary_cancer	TCGA-CF-A1HS-01A-11R-A13Y-07	Bladder Urothelial Carcinoma	7206d218-0e58-4722-8566-cbcbd8b8b4e0	NA	1.907
bladder_urothelial	primary_cancer	TCGA-DK-A3X1-01A-12R-A22U-07	Bladder Urothelial Carcinoma	d74030bf-dfa1-4f65-9596-fd505733139e	NA	2.859
bladder_urothelial	primary_cancer	TCGA-FD-A5BT-01A-11R-A26T-07	Bladder Urothelial Carcinoma	31fbf484-2cee-49a8-bf99-6c1b9d721b57	NA	0.454
bladder_urothelial	primary_cancer	TCGA-GV-A3QG-01A-11R-A220-07	Bladder Urothelial Carcinoma	d7c8fab5-a3c9-4650-9935-56c0fe27cbe6	NA	6.196
bladder_urothelial	primary_cancer	TCGA-R3-A69X-01A-22R-A30C-07	Bladder Urothelial Carcinoma	c394bf58-ce01-4ad3-a0f7-f2c5a251356d	NA	2.185
bladder_urothelial	primary_cancer	TCGA-S5-AA26-01A-11R-A38B-07	Bladder Urothelial Carcinoma	fd9b4ba5-8cb9-4867-81c9-33c608584488	NA	2.324
bladder_urothelial	primary_cancer	TCGA-BT-A20W-01A-21R-A14Y-07	Bladder Urothelial Carcinoma	3cefcb0b-796f-4ef0-b50d-a6ed17e9be4d	NA	6.549
bladder_urothelial	primary_cancer	TCGA-E5-A2PC-01A-11R-A206-07	Bladder Urothelial Carcinoma	c32574a0-5f85-4053-bb98-8472b496975e	NA	0.98
bladder_urothelial	primary_cancer	TCGA-XF-A9SM-01A-11R-A42T-07	Bladder Urothelial Carcinoma	2ffd7576-f25e-44f1-ba9f-7db6030aa0c6	NA	2.88
bladder_urothelial	primary_cancer	TCGA-ZF-A9R4-01A-11R-A38B-07	Bladder Urothelial Carcinoma	530bf880-039e-490c-8a9d-a27bc9b3d918	NA	1.96
bladder_urothelial	primary_cancer	TCGA-CU-A0YN-01A-21R-A10U-07	Bladder Urothelial Carcinoma	3d1b5ffe-38d6-4073-9020-c6897727341c	NA	1.499
bladder_urothelial	primary_cancer	TCGA-FJ-A871-01A-11R-A352-07	Bladder Urothelial Carcinoma	c19f7f59-5df6-4a57-91b0-635817d4fafd	NA	9.003
bladder_urothelial	primary_cancer	TCGA-FD-A5C1-01A-11R-A28M-07	Bladder Urothelial Carcinoma	20da407e-268c-4a10-9d1f-751974e09067	NA	0.483
bladder_urothelial	primary_cancer	TCGA-UY-A9PH-01A-11R-A38B-07	Bladder Urothelial Carcinoma	2a3b1b1a-9364-4bb2-beca-6933f88204c5	NA	0.542
bladder_urothelial	primary_cancer	TCGA-BT-A42C-01A-11R-A23N-07	Bladder Urothelial Carcinoma	f6b30464-1e34-4b52-baff-544f5fc8f52f	NA	10.028
bladder_urothelial	primary_cancer	TCGA-CF-A9FF-01A-11R-A38B-07	Bladder Urothelial Carcinoma	1a65f0c1-c6e4-470b-8be1-1744332a1470	NA	1.241
bladder_urothelial	primary_cancer	TCGA-DK-AA6T-01A-11R-A39I-07	Bladder Urothelial Carcinoma	a9eb4088-1eb0-47ac-867b-df97fbeb318c	NA	1.525
bladder_urothelial	primary_cancer	TCGA-FD-A3SP-01A-31R-A22U-07	Bladder Urothelial Carcinoma	9ad7733f-a2a6-4985-8ed3-d2c539eeab96	NA	3.623
bladder_urothelial	primary_cancer	TCGA-XF-AAME-01A-12R-A42T-07	Bladder Urothelial Carcinoma	8c50bd9a-1849-4466-aab6-da20488610f9	NA	3.093
bladder_urothelial	primary_cancer	TCGA-ZF-A9R3-01A-11R-A38B-07	Bladder Urothelial Carcinoma	a5a9f82f-f3f4-47dc-9dcd-6b65c1c73a37	NA	4.195
bladder_urothelial	primary_cancer	TCGA-DK-AA6S-01A-21R-A39I-07	Bladder Urothelial Carcinoma	f4159732-6dd2-4614-b3e2-3a528fdfa527	NA	2.689
bladder_urothelial	primary_cancer	TCGA-BT-A20U-01A-11R-A14Y-07	Bladder Urothelial Carcinoma	36a95ee7-1822-4d07-8110-843792006625	NA	0.404
bladder_urothelial	primary_cancer	TCGA-XF-A9SU-01A-31R-A39I-07	Bladder Urothelial Carcinoma	0cb1b6e8-1a05-472d-9651-126f92d17e73	NA	2.825
bladder_urothelial	primary_cancer	TCGA-DK-AA6R-01A-11R-A42T-07	Bladder Urothelial Carcinoma	0ccf81b2-c760-4a37-acf1-c692868167b1	NA	0.569
bladder_urothelial	primary_cancer	TCGA-E7-A85H-01A-11R-A352-07	Bladder Urothelial Carcinoma	1e9aa67a-52fe-4af3-8bbf-3597a57a4b72	NA	6.481
bladder_urothelial	primary_cancer	TCGA-DK-AA77-01A-11R-A39I-07	Bladder Urothelial Carcinoma	94b917da-6579-4d30-b81b-eba739bbae5c	NA	4.759
bladder_urothelial	primary_cancer	TCGA-E7-A3X6-01A-12R-A22U-07	Bladder Urothelial Carcinoma	b4bb6509-7d67-4d5e-8fd1-624fa373df4d	NA	0.32
bladder_urothelial	primary_cancer	TCGA-GC-A3RD-01A-12R-A22U-07	Bladder Urothelial Carcinoma	66132b23-e10a-49d9-89c5-129d7d98c17b	NA	3.606
bladder_urothelial	primary_cancer	TCGA-GV-A3JV-01A-11R-A220-07	Bladder Urothelial Carcinoma	5ddb876d-dd32-4f33-89d1-d95e460e1e60	NA	5.704
bladder_urothelial	primary_cancer	TCGA-K4-A6FZ-01A-11R-A31N-07	Bladder Urothelial Carcinoma	f873fe6d-9733-48a9-b7e0-23dc50874fbc	NA	1.08
bladder_urothelial	primary_cancer	TCGA-DK-A3IM-01A-11R-A20F-07	Bladder Urothelial Carcinoma	a09bfd63-c31c-461a-b5a4-60670f421233	NA	3.631
bladder_urothelial	primary_cancer	TCGA-ZF-A9R5-01A-12R-A42T-07	Bladder Urothelial Carcinoma	9e99dced-8649-4a7e-bba9-ccde95cc4045	NA	4.516
bladder_urothelial	primary_cancer	TCGA-ZF-AA4W-01A-12R-A38B-07	Bladder Urothelial Carcinoma	c8d6dc3d-024b-4b68-9395-c3c2c38e8bb2	NA	0.224
bladder_urothelial	primary_cancer	TCGA-G2-A2EL-01A-12R-A18C-07	Bladder Urothelial Carcinoma	3458d1fe-d159-4522-a627-70c5cc180daa	NA	27.718
bladder_urothelial	primary_cancer	TCGA-K4-A5RJ-01A-11R-A28M-07	Bladder Urothelial Carcinoma	57baff29-25d2-46ce-937f-f25343dcebc3	NA	3.853
bladder_urothelial	primary_cancer	TCGA-ZF-AA4R-01A-11R-A38B-07	Bladder Urothelial Carcinoma	d4ba2875-9bea-46eb-8279-72975c812701	NA	9.433
bladder_urothelial	primary_cancer	TCGA-BT-A42E-01A-11R-A23W-07	Bladder Urothelial Carcinoma	f89742f4-3575-4dd4-860f-ea9ab0321a48	NA	0.32
bladder_urothelial	primary_cancer	TCGA-XF-A9SJ-01A-11R-A39I-07	Bladder Urothelial Carcinoma	bdf3914e-37f0-4dc2-a246-b22c6ee15f81	NA	1.558
bladder_urothelial	primary_cancer	TCGA-DK-A6B6-01A-11R-A30C-07	Bladder Urothelial Carcinoma	fa1f8758-485c-4148-87b7-af891f652f48	NA	2.388
bladder_urothelial	primary_cancer	TCGA-KQ-A41Q-01A-11R-A33J-07	Bladder Urothelial Carcinoma	c130027b-a3f5-49be-b26d-a0416b7904b5	NA	3.654
bladder_urothelial	primary_cancer	TCGA-SY-A9G0-01A-12R-A38B-07	Bladder Urothelial Carcinoma	97226f81-8074-4b17-bcc7-c74e51216706	NA	5.672
bladder_urothelial	primary_cancer	TCGA-GD-A6C6-01A-21R-A31N-07	Bladder Urothelial Carcinoma	433eed62-f9d3-440a-bc04-f0156c70ee65	NA	3.27
bladder_urothelial	primary_cancer	TCGA-BT-A0S7-01A-11R-A10U-07	Bladder Urothelial Carcinoma	2bdc311e-59cc-449f-b8dc-6662052678fd	NA	3.589
bladder_urothelial	primary_cancer	TCGA-DK-A2I1-01A-11R-A180-07	Bladder Urothelial Carcinoma	6c390573-7472-441d-956b-9f4747a18f2b	NA	0.706
bladder_urothelial	primary_cancer	TCGA-GC-A3WC-01A-31R-A22U-07	Bladder Urothelial Carcinoma	3bea01e7-e5bc-484b-91f4-a143caed0aed	NA	0.474
bladder_urothelial	primary_cancer	TCGA-E7-A97Q-01A-11R-A38B-07	Bladder Urothelial Carcinoma	90e6e8a1-98b3-4f38-92ef-df460d78d657	NA	1.938
bladder_urothelial	primary_cancer	TCGA-DK-A3X2-01A-11R-A22U-07	Bladder Urothelial Carcinoma	c4fbd136-4227-4792-ac53-8c887aa6ab1a	NA	5.569
bladder_urothelial	primary_cancer	TCGA-2F-A9KW-01A-11R-A38B-07	Bladder Urothelial Carcinoma	88275e49-b282-414c-a941-9a77b991ff16	NA	4.523
bladder_urothelial	primary_cancer	TCGA-FD-A3SQ-01A-21R-A22U-07	Bladder Urothelial Carcinoma	029cb0c8-9a67-4af0-9137-a5fbe08fce20	NA	6.056
bladder_urothelial	primary_cancer	TCGA-UY-A9PB-01A-11R-A38B-07	Bladder Urothelial Carcinoma	d9954580-b237-40a2-b4a3-3ce2482f8da2	NA	1.352
bladder_urothelial	primary_cancer	TCGA-FD-A43P-01A-31R-A23W-07	Bladder Urothelial Carcinoma	0fa20811-219b-4d76-a8f6-d838e4de093e	NA	4.518
bladder_urothelial	primary_cancer	TCGA-E7-A7DV-01A-11R-A33J-07	Bladder Urothelial Carcinoma	c8fd7f63-e309-4a7e-876d-7ca2cf954abe	NA	0.097
bladder_urothelial	primary_cancer	TCGA-DK-AA74-01A-11R-A39I-07	Bladder Urothelial Carcinoma	ab176170-0468-4170-91cd-1e8f0b425b0b	NA	2.758
bladder_urothelial	primary_cancer	TCGA-G2-A2EJ-01A-11R-A180-07	Bladder Urothelial Carcinoma	968143b4-2bc1-4c77-88e7-a907a7cd018c	NA	0.055
bladder_urothelial	primary_cancer	TCGA-DK-A1AG-01A-11R-A13Y-07	Bladder Urothelial Carcinoma	b5036d12-d9cc-46a4-b60a-49740310380c	NA	6.133
bladder_urothelial	primary_cancer	TCGA-CF-A8HY-01A-11R-A36F-07	Bladder Urothelial Carcinoma	0f1dc780-622d-4f97-80e2-25d8074ff8b1	NA	1.527
bladder_urothelial	primary_cancer	TCGA-FD-A43U-01A-11R-A23W-07	Bladder Urothelial Carcinoma	1cd3bf53-27a7-4fda-8501-8270da2b8ceb	NA	0.702
bladder_urothelial	primary_cancer	TCGA-FJ-A3ZE-01A-11R-A23N-07	Bladder Urothelial Carcinoma	f7df4f7f-cd8e-44ba-b16f-203d6049c4fa	NA	2.565
bladder_urothelial	primary_cancer	TCGA-4Z-AA7S-01A-11R-A39I-07	Bladder Urothelial Carcinoma	7046aa00-ff84-4ff4-9157-63b3b1d898df	NA	9.157
bladder_urothelial	primary_cancer	TCGA-DK-A2I4-01A-11R-A21D-07	Bladder Urothelial Carcinoma	4c4fbc19-727b-48b0-82e0-42ca8309f315	NA	1.526
bladder_urothelial	primary_cancer	TCGA-FD-A62O-01A-11R-A30C-07	Bladder Urothelial Carcinoma	50fdf7c3-0e77-4013-ae2b-0e7c70b8d3e3	NA	7.427
bladder_urothelial	primary_cancer	TCGA-ZF-A9RD-01A-11R-A42T-07	Bladder Urothelial Carcinoma	4333b9aa-34fb-429f-b622-6ab259f12367	NA	0.236
bladder_urothelial	primary_cancer	TCGA-BL-A3JM-01A-12R-A21D-07	Bladder Urothelial Carcinoma	9a7e2ecf-3470-427e-93cd-8461a3a3a5b8	NA	4.891
bladder_urothelial	primary_cancer	TCGA-DK-A1AC-01A-11R-A13Y-07	Bladder Urothelial Carcinoma	037904cf-92c3-443c-8800-0156db1e3a89	NA	2.141
bladder_urothelial	primary_cancer	TCGA-4Z-AA80-01A-11R-A39I-07	Bladder Urothelial Carcinoma	b76b37cf-c9af-419d-a7c4-f97747de2946	NA	15.345
bladder_urothelial	primary_cancer	TCGA-XF-AAMZ-01A-11R-A42T-07	Bladder Urothelial Carcinoma	ccc9fcec-f07a-498b-9389-9c2b3aa0d2bf	NA	7.246
bladder_urothelial	primary_cancer	TCGA-C4-A0F0-01A-12R-A10U-07	Bladder Urothelial Carcinoma	958520af-f270-49ab-8fb6-57e1ae8ae68f	NA	0.263
bladder_urothelial	primary_cancer	TCGA-C4-A0F6-01A-11R-A10U-07	Bladder Urothelial Carcinoma	b1984010-7ef5-4df4-abfc-d18502cf124c	NA	8.632
bladder_urothelial	primary_cancer	TCGA-DK-A1AB-01A-11R-A13Y-07	Bladder Urothelial Carcinoma	fd79008e-fae5-4276-bc25-eae14eb7b7e4	NA	4.722
bladder_urothelial	primary_cancer	TCGA-BT-A2LD-01A-12R-A20F-07	Bladder Urothelial Carcinoma	6f3cb879-cf6d-4347-8aae-b6a6ee7a4274	NA	1.638
bladder_urothelial	primary_cancer	TCGA-DK-A6B2-01A-11R-A30C-07	Bladder Urothelial Carcinoma	f1e23b9a-a79f-439c-a4b9-58fbe9899e98	NA	1.549
bladder_urothelial	primary_cancer	TCGA-DK-A1AE-01A-11R-A13Y-07	Bladder Urothelial Carcinoma	b9f76fc8-ca33-46c5-89a0-ae16d42f987f	NA	2.174
bladder_urothelial	primary_cancer	TCGA-DK-A6B5-01A-11R-A31N-07	Bladder Urothelial Carcinoma	92e94724-a03e-4b58-91b2-f309ab8dc943	NA	1.18
bladder_urothelial	primary_cancer	TCGA-DK-A3IS-01A-21R-A21D-07	Bladder Urothelial Carcinoma	fd93cd6f-ab1c-460c-bfca-268c485a4f5b	NA	0.819
bladder_urothelial	primary_cancer	TCGA-UY-A8OD-01A-11R-A36F-07	Bladder Urothelial Carcinoma	1330c062-9641-4d39-a09f-18aebaa90550	NA	3.811
bladder_urothelial	primary_cancer	TCGA-BT-A3PJ-01A-21R-A220-07	Bladder Urothelial Carcinoma	5968c8d3-5f1a-4eb8-8d9b-8bd3fd3fd9f1	NA	0.05
bladder_urothelial	primary_cancer	TCGA-E7-A5KF-01A-11R-A28M-07	Bladder Urothelial Carcinoma	a5118740-bf71-47e8-a2e3-506792865c90	NA	5.227
bladder_urothelial	primary_cancer	TCGA-LC-A66R-01A-41R-A30C-07	Bladder Urothelial Carcinoma	538ad820-310d-4463-83a2-44ce1cac920c	NA	2.174
bladder_urothelial	primary_cancer	TCGA-K4-AAQO-01A-11R-A38B-07	Bladder Urothelial Carcinoma	9da50002-f2ba-4a66-8668-79386cf5ea4d	NA	4.228
bladder_urothelial	primary_cancer	TCGA-FD-A3N6-01A-11R-A21D-07	Bladder Urothelial Carcinoma	575f9b1e-4952-488a-bbdd-ac98c1f68382	NA	0.234
bladder_urothelial	primary_cancer	TCGA-BT-A20R-01A-12R-A16R-07	Bladder Urothelial Carcinoma	d785b32a-686a-43d6-9e0b-0b63cfd63772	NA	1.777
bladder_urothelial	primary_cancer	TCGA-XF-A9T8-01A-11R-A39I-07	Bladder Urothelial Carcinoma	949b3248-f078-43cc-b6d8-39e9eabf88f1	NA	0.549
bladder_urothelial	primary_cancer	TCGA-BL-A13I-01A-11R-A277-07	Bladder Urothelial Carcinoma	f36d565e-7fea-4fae-87b2-70d7e75b36ef	NA	0.873
bladder_urothelial	primary_cancer	TCGA-GU-AATQ-01A-11R-A39I-07	Bladder Urothelial Carcinoma	263c3285-8412-426e-a042-1e4266190a03	NA	3.423
bladder_urothelial	primary_cancer	TCGA-E7-A3Y1-01A-11R-A22U-07	Bladder Urothelial Carcinoma	791a46e8-4d45-4878-b09d-a4f64ce88746	NA	0.271
bladder_urothelial	primary_cancer	TCGA-FD-A6TC-01A-21R-A33J-07	Bladder Urothelial Carcinoma	30f1a64e-5df3-4e26-b820-a4254e7e3a7e	NA	1.932
bladder_urothelial	primary_cancer	TCGA-BT-A20Q-01A-11R-A14Y-07	Bladder Urothelial Carcinoma	ca10d08d-3cc5-4171-9a70-66fdff3c0c3d	NA	4.341
bladder_urothelial	primary_cancer	TCGA-FD-A5BY-01A-31R-A28M-07	Bladder Urothelial Carcinoma	94309b2e-c58c-4e2b-981d-0badb3872db7	NA	2.96
bladder_urothelial	primary_cancer	TCGA-BT-A20P-01A-11R-A14Y-07	Bladder Urothelial Carcinoma	febead73-3b12-44e6-8bab-a7cfa7bf1129	NA	7.021
bladder_urothelial	primary_cancer	TCGA-XF-A9ST-01A-11R-A42T-07	Bladder Urothelial Carcinoma	378c51fa-27d3-4e70-a471-9f1006513d24	NA	3.291
bladder_urothelial	primary_cancer	TCGA-PQ-A6FI-01A-11R-A31N-07	Bladder Urothelial Carcinoma	74cbc344-560b-439b-bd14-1542ce579967	NA	0.524
bladder_urothelial	primary_cancer	TCGA-FD-A3SJ-01A-12R-A22U-07	Bladder Urothelial Carcinoma	b8afe780-f680-40db-a941-e984660ff90c	NA	9.294
bladder_urothelial	primary_cancer	TCGA-G2-AA3B-01A-11R-A39I-07	Bladder Urothelial Carcinoma	50731ae0-4466-47c1-9e65-42227a3fc252	NA	2.291
bladder_urothelial	primary_cancer	TCGA-2F-A9KQ-01A-11R-A38B-07	Bladder Urothelial Carcinoma	aa3e32f5-11ad-462a-aa5b-f477cfab3f4f	NA	2.986
bladder_urothelial	primary_cancer	TCGA-UY-A78K-01A-11R-A33J-07	Bladder Urothelial Carcinoma	d31897c3-5d0a-4104-bdc6-4b12eb061c2a	NA	4.398
bladder_urothelial	primary_cancer	TCGA-GU-AATO-01A-11R-A39I-07	Bladder Urothelial Carcinoma	f680256f-f3be-4742-8211-6635de93f0b6	NA	8.182
bladder_urothelial	primary_cancer	TCGA-DK-A2I6-01A-12R-A18C-07	Bladder Urothelial Carcinoma	ad775597-406f-4470-894a-e37d0666761b	NA	1.999
bladder_urothelial	primary_cancer	TCGA-FT-A61P-01A-11R-A30C-07	Bladder Urothelial Carcinoma	370c2202-46b7-4721-a1db-ee80f6ca7782	NA	2.437
bladder_urothelial	primary_cancer	TCGA-K4-A4AC-01A-21R-A26T-07	Bladder Urothelial Carcinoma	90c55ddf-3ac3-4599-80f6-e29e486d2070	NA	0.072
bladder_urothelial	primary_cancer	TCGA-FD-A5BU-01A-31R-A26T-07	Bladder Urothelial Carcinoma	06d4cd28-11fb-4f25-8ae0-3fa8e3f3e325	NA	1.159
bladder_urothelial	primary_cancer	TCGA-DK-A3IU-01A-11R-A20F-07	Bladder Urothelial Carcinoma	c07c2f21-21d4-49cb-93bb-8d128966fcd6	NA	1.501
bladder_urothelial	primary_cancer	TCGA-ZF-A9RN-01A-11R-A42T-07	Bladder Urothelial Carcinoma	debf57c3-f5e0-418a-ad1c-40a8ccc93692	NA	1.587
bladder_urothelial	primary_cancer	TCGA-DK-A3WY-01A-11R-A22U-07	Bladder Urothelial Carcinoma	169e537f-9ffc-4d56-9e77-1f38951ee3d3	NA	1.466
bladder_urothelial	primary_cancer	TCGA-DK-AA6Q-01A-11R-A39I-07	Bladder Urothelial Carcinoma	52e425cf-1fad-400e-bc39-6df2a3310a68	NA	3.192
bladder_urothelial	primary_cancer	TCGA-FD-A62S-01A-11R-A30C-07	Bladder Urothelial Carcinoma	341d1383-93bd-42d7-80ad-5dba732c1925	NA	1.829
bladder_urothelial	primary_cancer	TCGA-DK-A3IQ-01A-31R-A32Y-07	Bladder Urothelial Carcinoma	b68f9935-3265-4930-a221-61bc9f8e2eda	NA	4.824
bladder_urothelial	primary_cancer	TCGA-E7-A7DU-01A-11R-A32O-07	Bladder Urothelial Carcinoma	c87fa518-41c5-417a-88ac-0b300f1a8732	NA	0.926
bladder_urothelial	primary_cancer	TCGA-GU-A42R-01A-11R-A23N-07	Bladder Urothelial Carcinoma	50dd2bb1-e069-42f8-89f4-1e3055adafee	NA	2.555
bladder_urothelial	primary_cancer	TCGA-K4-A3WV-01A-11R-A22U-07	Bladder Urothelial Carcinoma	80ddbbc6-11ff-469a-96ec-a72e0e2ec9c4	NA	12.432
bladder_urothelial	primary_cancer	TCGA-DK-AA6X-01A-12R-A42T-07	Bladder Urothelial Carcinoma	254061df-9073-4d41-a519-e79cc2d5c562	NA	5.561
bladder_urothelial	primary_cancer	TCGA-XF-AAML-01A-11R-A42T-07	Bladder Urothelial Carcinoma	fbca79e2-8904-4bdf-aede-b2049cb81302	NA	10.197
bladder_urothelial	primary_cancer	TCGA-XF-A9SI-01A-11R-A39I-07	Bladder Urothelial Carcinoma	dee47fe6-4c8e-4801-abae-d3a03be1ea8e	NA	2.229
bladder_urothelial	primary_cancer	TCGA-E7-A8O7-01A-11R-A36F-07	Bladder Urothelial Carcinoma	0379335d-61be-4142-9ba3-2676dd0945d8	NA	12.93
bladder_urothelial	primary_cancer	TCGA-CF-A27C-01A-11R-A16R-07	Bladder Urothelial Carcinoma	d6d7412b-5ec2-413e-a85d-7f765c67afa3	NA	1.714
bladder_urothelial	primary_cancer	TCGA-ZF-AA58-01A-12R-A42T-07	Bladder Urothelial Carcinoma	563f3a26-7e97-41ff-a52c-48ba484e3a39	NA	1.419
bladder_urothelial	primary_cancer	TCGA-4Z-AA7Y-01A-11R-A39I-07	Bladder Urothelial Carcinoma	e189bbc1-0308-4f79-b296-01c4b38b8919	NA	13.707
bladder_urothelial	primary_cancer	TCGA-FJ-A3Z9-01A-11R-A26T-07	Bladder Urothelial Carcinoma	83c4827f-742b-42bf-96d0-335b484ee724	NA	2.105
bladder_urothelial	primary_cancer	TCGA-2F-A9KR-01A-11R-A38B-07	Bladder Urothelial Carcinoma	a9321523-588e-40f2-95d2-2501fd1b23ee	NA	2.277
bladder_urothelial	primary_cancer	TCGA-XF-AAMH-01A-11R-A42T-07	Bladder Urothelial Carcinoma	4cdcbbae-5859-414b-bc81-001b25a3d4f1	NA	5.64
bladder_urothelial	primary_cancer	TCGA-FD-A3SM-01A-11R-A22U-07	Bladder Urothelial Carcinoma	ae3c4446-cb58-4b5b-9eb8-6c81e1bf4535	NA	0.996
bladder_urothelial	primary_cancer	TCGA-HQ-A2OF-01A-11R-A26T-07	Bladder Urothelial Carcinoma	99471b35-21e6-44cb-863e-d60521a71b31	NA	3.561
bladder_urothelial	primary_cancer	TCGA-CU-A0YO-01A-11R-A10U-07	Bladder Urothelial Carcinoma	2fdb2cad-53e5-44e4-8b80-ee5801964b20	NA	1.209
bladder_urothelial	primary_cancer	TCGA-GC-A4ZW-01A-11R-A26T-07	Bladder Urothelial Carcinoma	e7756fc3-3cc9-4417-a5c2-a69e67e8df10	NA	6.077
bladder_urothelial	primary_cancer	TCGA-XF-A9SK-01A-11R-A42T-07	Bladder Urothelial Carcinoma	1e48f03f-3939-4dfd-8d32-c85ec473678a	NA	4.821
bladder_urothelial	primary_cancer	TCGA-DK-AA6L-01A-11R-A39I-07	Bladder Urothelial Carcinoma	ccc6510d-4ef3-4471-8fd1-e240fe55d95c	NA	2.768
bladder_urothelial	primary_cancer	TCGA-G2-A2ES-01A-11R-A180-07	Bladder Urothelial Carcinoma	fac8f7fd-3e80-410a-a281-2b564862b335	NA	0.231
bladder_urothelial	primary_cancer	TCGA-BT-A42F-01A-11R-A23W-07	Bladder Urothelial Carcinoma	36f98bd7-f044-4497-9d19-e25c8e847def	NA	0.11
bladder_urothelial	primary_cancer	TCGA-K4-A6MB-01A-11R-A31N-07	Bladder Urothelial Carcinoma	7e8935da-773b-4337-8fa2-f52ebbaceaee	NA	1.707
bladder_urothelial	primary_cancer	TCGA-CU-A3KJ-01A-11R-A21D-07	Bladder Urothelial Carcinoma	511d6289-1558-4e90-a77a-05298e15b17c	NA	0.882
bladder_urothelial	primary_cancer	TCGA-FD-A3SS-01A-12R-A22U-07	Bladder Urothelial Carcinoma	6aec2686-fcea-4d3e-8311-0b6ccad4c000	NA	1.109
bladder_urothelial	primary_cancer	TCGA-XF-AAMT-01A-11R-A42T-07	Bladder Urothelial Carcinoma	72dcc6a3-c2ce-4e24-897d-880a0f01c1aa	NA	2.089
bladder_urothelial	primary_cancer	TCGA-GV-A3QF-01A-31R-A22U-07	Bladder Urothelial Carcinoma	f732f86b-5190-4827-8471-656a43b47681	NA	2.25
bladder_urothelial	primary_cancer	TCGA-CF-A9FH-01A-11R-A38B-07	Bladder Urothelial Carcinoma	1e7def5c-75f1-471d-9fab-b7e350c794a8	NA	4.334
bladder_urothelial	primary_cancer	TCGA-ZF-A9R2-01A-11R-A39I-07	Bladder Urothelial Carcinoma	f29aacd1-503d-4f56-8faa-2ba309ce4f23	NA	0.791
bladder_urothelial	primary_cancer	TCGA-XF-A8HD-01A-11R-A36F-07	Bladder Urothelial Carcinoma	f40981b0-a1e6-43d2-ae38-c2a7d6166fbf	NA	0.567
bladder_urothelial	primary_cancer	TCGA-ZF-AA52-01A-12R-A39I-07	Bladder Urothelial Carcinoma	f18b7d09-aace-4a7e-839a-6f6eeb189f63	NA	1.971
bladder_urothelial	primary_cancer	TCGA-4Z-AA7Q-01A-11R-A39I-07	Bladder Urothelial Carcinoma	7d08924f-7f7e-48f2-80d6-275b4d964697	NA	1.268
bladder_urothelial	primary_cancer	TCGA-CF-A7I0-01A-22R-A352-07	Bladder Urothelial Carcinoma	2ee1e299-76a9-4d45-a79b-02c1f31f9399	NA	5.876
bladder_urothelial	primary_cancer	TCGA-CU-A0YR-01A-12R-A10U-07	Bladder Urothelial Carcinoma	cec64615-07c6-4e49-8e59-afb97d37464f	NA	0.429
bladder_urothelial	primary_cancer	TCGA-XF-A9SH-01A-11R-A39I-07	Bladder Urothelial Carcinoma	1e640951-76e2-4691-bfda-301e6bd11c47	NA	1.834
bladder_urothelial	primary_cancer	TCGA-FD-A5BS-01A-21R-A26T-07	Bladder Urothelial Carcinoma	18bb3804-de1e-4988-abbf-89c36d07cc01	NA	0.593
bladder_urothelial	primary_cancer	TCGA-CF-A3MG-01A-11R-A20F-07	Bladder Urothelial Carcinoma	772b8a77-bb90-40a8-ad48-f7a1fc1769de	NA	5.608
bladder_urothelial	primary_cancer	TCGA-BT-A20J-01A-11R-A14Y-07	Bladder Urothelial Carcinoma	09898301-3dac-4b86-af1b-6cbad9f2d380	NA	2.44
bladder_urothelial	primary_cancer	TCGA-FD-A3B5-01A-11R-A20F-07	Bladder Urothelial Carcinoma	1afbe0f3-e320-4d74-8648-0c26ddbeab7f	NA	0.846
bladder_urothelial	primary_cancer	TCGA-DK-A3IL-01A-11R-A20F-07	Bladder Urothelial Carcinoma	f154cc00-e118-4d4c-b9d2-2f1f71e0a964	NA	3.58
bladder_urothelial	primary_cancer	TCGA-XF-A9SX-01A-21R-A39I-07	Bladder Urothelial Carcinoma	2c28e7b4-23b3-46b0-927b-c684d73d1543	NA	4.379
bladder_urothelial	primary_cancer	TCGA-FD-A5BZ-01A-11R-A28M-07	Bladder Urothelial Carcinoma	ee7d92c6-8a20-41ec-8e43-7a7c462b13d5	NA	2.296
bladder_urothelial	primary_cancer	TCGA-CF-A3MI-01A-11R-A20F-07	Bladder Urothelial Carcinoma	63fcdb32-0c58-4541-afbc-96b34020c5c8	NA	0.143
bladder_urothelial	primary_cancer	TCGA-YF-AA3L-01A-11R-A38B-07	Bladder Urothelial Carcinoma	b4f88ea9-de76-4d5b-a535-5a1a010903e4	NA	4.957
bladder_urothelial	primary_cancer	TCGA-BT-A20V-01A-11R-A14Y-07	Bladder Urothelial Carcinoma	80cdd385-2a6a-4d59-81c7-f36786637323	NA	2.327
bladder_urothelial	primary_cancer	TCGA-ZF-AA54-01A-11R-A39I-07	Bladder Urothelial Carcinoma	b7db14a4-5268-44e5-aed1-7200c6c82a2d	NA	1.776
bladder_urothelial	primary_cancer	TCGA-BT-A3PK-01A-21R-A220-07	Bladder Urothelial Carcinoma	20ca7c4d-7ef0-4fc5-907b-a90fec12a561	NA	2.354
bladder_urothelial	primary_cancer	TCGA-FT-A3EE-01A-11R-A206-07	Bladder Urothelial Carcinoma	1b08c8c9-5739-409d-9cbc-3b06ad1f60e6	NA	0.712
bladder_urothelial	primary_cancer	TCGA-XF-AAMY-01A-11R-A42T-07	Bladder Urothelial Carcinoma	97d81888-4ec1-438c-bbc3-1d10216e7606	NA	1.176
bladder_urothelial	primary_cancer	TCGA-FD-A3B3-01A-12R-A206-07	Bladder Urothelial Carcinoma	1cc49a56-ee39-4fd1-bf80-a6b71695c1f1	NA	0.554
bladder_urothelial	primary_cancer	TCGA-YC-A89H-01A-11R-A36F-07	Bladder Urothelial Carcinoma	347ce226-e621-4492-a821-c990b5ef4ff3	NA	1.048
bladder_urothelial	primary_cancer	TCGA-LT-A5Z6-01A-11R-A28M-07	Bladder Urothelial Carcinoma	1002d9de-3bd1-4d22-8f2a-64b3114264e0	NA	7.955
bladder_urothelial	primary_cancer	TCGA-K4-A5RI-01A-11R-A28M-07	Bladder Urothelial Carcinoma	d3cf6983-3dfc-4533-8809-605c197fc24e	NA	1.364
bladder_urothelial	primary_cancer	TCGA-CF-A5UA-01A-11R-A28M-07	Bladder Urothelial Carcinoma	6ab37abf-8cc9-4274-bf5c-f08ec3f4d136	NA	6.804
bladder_urothelial	primary_cancer	TCGA-UY-A8OC-01A-11R-A36F-07	Bladder Urothelial Carcinoma	59551fc3-7885-44d9-bf8a-ffdd5bea8238	NA	0.897
bladder_urothelial	primary_cancer	TCGA-FD-A43X-01A-11R-A23W-07	Bladder Urothelial Carcinoma	f68894de-6db1-472b-bbda-f1c6e60a818b	NA	4.391
bladder_urothelial	primary_cancer	TCGA-XF-A8HF-01A-11R-A36F-07	Bladder Urothelial Carcinoma	74bf5bf4-7a66-4316-9b43-a85db455dfd3	NA	2.023
bladder_urothelial	primary_cancer	TCGA-UY-A78L-01A-12R-A33J-07	Bladder Urothelial Carcinoma	e356927b-b100-4adf-9935-e4fbf31d1fd3	NA	0.222
bladder_urothelial	primary_cancer	TCGA-E7-A7PW-01A-11R-A352-07	Bladder Urothelial Carcinoma	73afa387-c132-48d6-82da-26517c161f13	NA	1.889
bladder_urothelial	primary_cancer	TCGA-UY-A78M-01A-21R-A352-07	Bladder Urothelial Carcinoma	49951b76-0020-4c3c-a279-8175c82c3bc6	NA	0.69
bladder_urothelial	primary_cancer	TCGA-FD-A43S-01A-21R-A23W-07	Bladder Urothelial Carcinoma	a36865ec-a5fa-4277-a887-325373acadb1	NA	3.301
bladder_urothelial	primary_cancer	TCGA-DK-A1AF-01A-11R-A13Y-07	Bladder Urothelial Carcinoma	3add40ce-6d64-4ded-9ab6-2f076c420dc4	NA	2.27
bladder_urothelial	primary_cancer	TCGA-FD-A6TF-01A-52R-A32O-07	Bladder Urothelial Carcinoma	fe6853dd-864f-4257-869f-a425aab32346	NA	3.465
bladder_urothelial	primary_cancer	TCGA-YC-A8S6-01A-31R-A38B-07	Bladder Urothelial Carcinoma	a2b8a4b8-202d-4705-89ab-5ac06028d7b0	NA	0.786
bladder_urothelial	primary_cancer	TCGA-XF-AAN4-01A-11R-A42T-07	Bladder Urothelial Carcinoma	60b688ac-61c5-4407-82e4-545cb869dca4	NA	4.408
bladder_urothelial	primary_cancer	TCGA-UY-A78N-01A-12R-A33J-07	Bladder Urothelial Carcinoma	fd7fac82-d8e3-4133-be0e-ec5b2badc5d1	NA	5.727
bladder_urothelial	primary_cancer	TCGA-ZF-AA4V-01A-11R-A38B-07	Bladder Urothelial Carcinoma	1ff7160a-3918-4942-8a87-9b78d2306c2e	NA	0.301
bladder_urothelial	primary_cancer	TCGA-GU-A42P-01A-11R-A23W-07	Bladder Urothelial Carcinoma	81018f98-fee6-4cde-b6f6-3b6254e3e8d7	NA	9.882
bladder_urothelial	primary_cancer	TCGA-ZF-AA56-01A-31R-A39I-07	Bladder Urothelial Carcinoma	5cfa74de-919c-4c0a-9f17-d609268723d6	NA	0.991
bladder_urothelial	primary_cancer	TCGA-GV-A3QH-01A-11R-A220-07	Bladder Urothelial Carcinoma	dc901511-9e0f-4fc6-b6f4-bee8e627ce25	NA	6.338
bladder_urothelial	primary_cancer	TCGA-E7-A677-01A-11R-A30C-07	Bladder Urothelial Carcinoma	0aba0f10-05b2-4045-822b-045f61457427	NA	9.493
bladder_urothelial	primary_cancer	TCGA-DK-A3WX-01A-22R-A22U-07	Bladder Urothelial Carcinoma	024bc00e-0419-4dc6-8df4-ad3af476314d	NA	0.529
bladder_urothelial	primary_cancer	TCGA-DK-A6AW-01A-11R-A30C-07	Bladder Urothelial Carcinoma	d1b0c4db-59b7-47ac-b26f-fb14c5aac200	NA	0.067
bladder_urothelial	primary_cancer	TCGA-DK-AA71-01A-31R-A39I-07	Bladder Urothelial Carcinoma	eb3cfcc9-657c-4527-ac58-948307cae54c	NA	5.77
bladder_urothelial	primary_cancer	TCGA-UY-A9PD-01A-11R-A38B-07	Bladder Urothelial Carcinoma	417805b3-9c10-4724-ab87-480c773f7d16	NA	0.629
bladder_urothelial	primary_cancer	TCGA-DK-A6B1-01A-12R-A30C-07	Bladder Urothelial Carcinoma	a66ddf41-6af9-47c0-952b-688aac83c8c8	NA	2.9
bladder_urothelial	primary_cancer	TCGA-ZF-A9RC-01A-11R-A38B-07	Bladder Urothelial Carcinoma	73e05f0f-01df-484e-94f5-b0586480f000	NA	8.332
bladder_urothelial	primary_cancer	TCGA-CU-A5W6-01A-11R-A28M-07	Bladder Urothelial Carcinoma	168e440a-b356-45c7-849c-43823703417e	NA	3.513
bladder_urothelial	primary_cancer	TCGA-DK-A6B0-01A-11R-A31N-07	Bladder Urothelial Carcinoma	b6ebbe90-feb4-4e8e-9408-031db2297c1c	NA	4.13
bladder_urothelial	primary_cancer	TCGA-G2-AA3F-01A-12R-A42T-07	Bladder Urothelial Carcinoma	4b3c1687-622c-4c9f-9fe7-25b197629133	NA	10.182
bladder_urothelial	primary_cancer	TCGA-FD-A5BX-01A-11R-A26T-07	Bladder Urothelial Carcinoma	bd49f808-37de-43a4-8a5f-7a36b9661a16	NA	0.606
bladder_urothelial	primary_cancer	TCGA-XF-AAMG-01A-11R-A42T-07	Bladder Urothelial Carcinoma	e204f212-b8ad-47d1-ab9c-179b7389e47e	NA	9.187
bladder_urothelial	primary_cancer	TCGA-GV-A3QK-01B-11R-A23N-07	Bladder Urothelial Carcinoma	bd5b7c93-fabe-4bb8-a78f-981aeed75d79	NA	0.731
bladder_urothelial	primary_cancer	TCGA-BL-A13J-01A-11R-A277-07	Bladder Urothelial Carcinoma	06d706f6-4e05-4ffc-9b75-f9fccb639a33	NA	0.49
bladder_urothelial	primary_cancer	TCGA-FD-A3B4-01A-12R-A206-07	Bladder Urothelial Carcinoma	80e9793f-4e30-45ad-8660-3686685f2db9	NA	1.47
bladder_urothelial	primary_cancer	TCGA-XF-AAMW-01A-11R-A42T-07	Bladder Urothelial Carcinoma	74bb1ce2-532c-4667-9650-765e25c26724	NA	0.439
bladder_urothelial	primary_cancer	TCGA-XF-AAMJ-01A-11R-A42T-07	Bladder Urothelial Carcinoma	c3919da2-0345-4374-940a-89fc70b7f393	NA	3.697
bladder_urothelial	primary_cancer	TCGA-E7-A541-01A-11R-A26T-07	Bladder Urothelial Carcinoma	dbffd0f0-d063-45a2-8cdb-e6ffa6c9e66d	NA	0.685
bladder_urothelial	primary_cancer	TCGA-FJ-A3ZF-01A-11R-A23N-07	Bladder Urothelial Carcinoma	e68b253d-6149-4c42-a5b3-1ddc2448759b	NA	2.574
bladder_urothelial	primary_cancer	TCGA-FD-A6TE-01A-12R-A33J-07	Bladder Urothelial Carcinoma	535736bf-6e19-4fc6-bf3d-a2fb4739c763	NA	6.267
bladder_urothelial	primary_cancer	TCGA-ZF-A9RM-01A-11R-A38B-07	Bladder Urothelial Carcinoma	bd7c10f2-12d7-4405-a3bc-0809237dcb85	NA	4.917
bladder_urothelial	primary_cancer	TCGA-FD-A5BR-01A-11R-A26T-07	Bladder Urothelial Carcinoma	8f1bfe41-e48c-4b5d-8b03-8def7666da02	NA	1.686
bladder_urothelial	primary_cancer	TCGA-SY-A9G5-01A-11R-A38B-07	Bladder Urothelial Carcinoma	183b63ef-c966-4348-a989-9c7e2b4a8082	NA	2.395
bladder_urothelial	primary_cancer	TCGA-DK-A2I2-01A-11R-A180-07	Bladder Urothelial Carcinoma	325c6503-12a1-4985-99a0-b968850f9d92	NA	0.688
bladder_urothelial	primary_cancer	TCGA-XF-AAMX-01A-11R-A42T-07	Bladder Urothelial Carcinoma	f40bfbec-9e14-4f28-a4d5-5aa06e90a4bb	NA	1.413
bladder_urothelial	primary_cancer	TCGA-FD-A6TB-01A-12R-A33J-07	Bladder Urothelial Carcinoma	8038ffb4-38d5-437a-9457-4943c0202a8a	NA	1.74
bladder_urothelial	primary_cancer	TCGA-CU-A3YL-01A-11R-A22U-07	Bladder Urothelial Carcinoma	68b08ead-5e38-490f-8654-b3db19c80fca	NA	2.128
bladder_urothelial	primary_cancer	TCGA-G2-A3VY-01A-11R-A22U-07	Bladder Urothelial Carcinoma	7d6ea81b-b8a5-4d3b-aa54-9bf51d8b698b	NA	4.767
bladder_urothelial	primary_cancer	TCGA-FD-A6TD-01A-51R-A33J-07	Bladder Urothelial Carcinoma	f6660fcd-6277-4eb7-8135-5aea56fedd7c	NA	2.716
bladder_urothelial	primary_cancer	TCGA-BL-A0C8-01A-11R-A277-07	Bladder Urothelial Carcinoma	45e06598-828f-4d6f-92ed-5f05fb72f8d7	NA	1.082
bladder_urothelial	primary_cancer	TCGA-FD-A3B7-01A-31R-A20F-07	Bladder Urothelial Carcinoma	32d604cb-3bf5-427c-b60d-3c9cfeb7f0a5	NA	3.453
bladder_urothelial	primary_cancer	TCGA-DK-AA6U-01A-11R-A39I-07	Bladder Urothelial Carcinoma	81741a67-7bfd-46c5-8784-a4c87eb71c5e	NA	6.241
bladder_urothelial	primary_cancer	TCGA-ZF-A9R7-01A-11R-A38B-07	Bladder Urothelial Carcinoma	9e1c37bb-1c94-4a98-8e44-e03953aa8ad9	NA	1.342
bladder_urothelial	primary_cancer	TCGA-YF-AA3M-01A-11R-A42T-07	Bladder Urothelial Carcinoma	6f9d42b2-dcbf-440a-9d11-1a434f202227	NA	5.759
bladder_urothelial	primary_cancer	TCGA-ZF-AA5N-01A-11R-A42T-07	Bladder Urothelial Carcinoma	283dae7a-c249-4f56-b8ae-e9a13e451269	NA	0.395
bladder_urothelial	primary_cancer	TCGA-DK-A6AV-01A-12R-A30C-07	Bladder Urothelial Carcinoma	01a7643f-d7be-40e8-bdc1-562d825e8ba8	NA	1.3
bladder_urothelial	primary_cancer	TCGA-XF-AAN1-01A-31R-A42T-07	Bladder Urothelial Carcinoma	4f40609b-40ad-44f2-9185-a4c99056c48e	NA	9.168
bladder_urothelial	primary_cancer	TCGA-E7-A4XJ-01A-11R-A26T-07	Bladder Urothelial Carcinoma	a40c2a50-5627-4fd2-a6a3-2661c4ee5839	NA	2.464
bladder_urothelial	primary_cancer	TCGA-4Z-AA84-01A-11R-A39I-07	Bladder Urothelial Carcinoma	210311b9-88d7-4e29-974a-0e807ea88d1b	NA	0.306
bladder_urothelial	primary_cancer	TCGA-GC-A3OO-01A-11R-A22U-07	Bladder Urothelial Carcinoma	ad2ee4b7-ec51-4076-bc5b-6601b5abeecb	NA	2.672
bladder_urothelial	primary_cancer	TCGA-GV-A3QI-01A-11R-A220-07	Bladder Urothelial Carcinoma	ea9d4bd8-1f4e-4ad5-81f7-803b078f2603	NA	16.58
bladder_urothelial	primary_cancer	TCGA-DK-A1A7-01A-11R-A13Y-07	Bladder Urothelial Carcinoma	94447759-c20c-49f5-b51f-cbfdea41f2e8	NA	1.073
bladder_urothelial	primary_cancer	TCGA-DK-A1A5-01A-11R-A13Y-07	Bladder Urothelial Carcinoma	5e7e3e20-cbfa-476d-bb92-fa3a58207a9b	NA	1.637
bladder_urothelial	primary_cancer	TCGA-K4-A3WS-01A-11R-A22U-07	Bladder Urothelial Carcinoma	bf7a27d9-35a8-4c59-bf27-e3fa9b271e6e	NA	4.894
bladder_urothelial	primary_cancer	TCGA-5N-A9KI-01A-31R-A42T-07	Bladder Urothelial Carcinoma	8b3cfbe2-bb77-4fe0-af7c-569f83701beb	NA	3.829
bladder_urothelial	primary_cancer	TCGA-DK-A1A6-01A-11R-A13Y-07	Bladder Urothelial Carcinoma	381b51af-d1f7-41db-a69e-49d681b3ef39	NA	2.728
bladder_urothelial	primary_cancer	TCGA-GV-A6ZA-01A-12R-A33J-07	Bladder Urothelial Carcinoma	5d19bc28-408e-4dc6-bc4b-95b28fa0dddc	NA	3.592
bladder_urothelial	primary_cancer	TCGA-K4-A4AB-01B-12R-A28M-07	Bladder Urothelial Carcinoma	d27207d8-a3cf-475b-963a-e393eef98538	NA	0.781
bladder_urothelial	primary_cancer	TCGA-ZF-AA4N-01A-11R-A38B-07	Bladder Urothelial Carcinoma	8baefcdb-0b95-4f4a-a7ba-3ee75c227bd1	NA	0.074
bladder_urothelial	primary_cancer	TCGA-ZF-AA4T-01A-11R-A38B-07	Bladder Urothelial Carcinoma	7897b96a-99f9-4db8-abda-04caa8059896	NA	10.221
bladder_urothelial	primary_cancer	TCGA-FD-A3N5-01A-11R-A21D-07	Bladder Urothelial Carcinoma	e7925508-8b2f-4c39-bd7a-033e78b1f875	NA	0.658
bladder_urothelial	primary_cancer	TCGA-CF-A3MH-01A-11R-A20F-07	Bladder Urothelial Carcinoma	38e62ae5-729f-41fa-94e7-7e3caa0a246b	NA	5.028
bladder_urothelial	primary_cancer	TCGA-2F-A9KP-01A-11R-A38B-07	Bladder Urothelial Carcinoma	c4cd3829-e7e0-4f1e-8796-856fddcf50ae	NA	2.583
bladder_urothelial	primary_cancer	TCGA-XF-A9T6-01A-11R-A42T-07	Bladder Urothelial Carcinoma	cbc184c2-4bda-4a56-9b49-453f503e16ab	NA	5.085
bladder_urothelial	primary_cancer	TCGA-FD-A3SR-01A-11R-A22U-07	Bladder Urothelial Carcinoma	dafc2af2-7b91-45a4-ae67-fe22ab060f06	NA	2.251
bladder_urothelial	primary_cancer	TCGA-G2-A2EK-01A-22R-A18C-07	Bladder Urothelial Carcinoma	bc993392-5f2f-4cb8-8d27-26f3df2b3583	NA	3.956
bladder_urothelial	primary_cancer	TCGA-GV-A40G-01A-11R-A23N-07	Bladder Urothelial Carcinoma	73220a3d-e4e3-4494-a832-86baa98333b4	NA	3.394
bladder_urothelial	primary_cancer	TCGA-E7-A678-01A-11R-A30C-07	Bladder Urothelial Carcinoma	4e0401b2-6ad4-4709-aa43-f2af0afef259	NA	1.693
bladder_urothelial	primary_cancer	TCGA-DK-AA76-01A-11R-A39I-07	Bladder Urothelial Carcinoma	4ecec21e-cbd5-42ec-af2e-bf58f2710458	NA	3.186
bladder_urothelial	primary_cancer	TCGA-GU-A763-01A-11R-A32O-07	Bladder Urothelial Carcinoma	459468e0-79bc-4544-b168-27a85342d4c1	NA	1.786
bladder_urothelial	primary_cancer	TCGA-CF-A9FM-01A-11R-A38B-07	Bladder Urothelial Carcinoma	5071fd5a-8c44-4dfb-bcca-31885b033372	NA	7.434
bladder_urothelial	primary_cancer	TCGA-FD-A43Y-01A-21R-A26T-07	Bladder Urothelial Carcinoma	5ee80128-f80f-4892-9668-43c03c41bd65	NA	0.723
bladder_urothelial	primary_cancer	TCGA-XF-AAN5-01A-11R-A42T-07	Bladder Urothelial Carcinoma	e1adc304-07de-493e-a800-50fc1ab65b30	NA	0.491
bladder_urothelial	primary_cancer	TCGA-XF-A9SL-01A-11R-A39I-07	Bladder Urothelial Carcinoma	c5f00487-d24a-46fc-9f15-f7fc22e28e0b	NA	4.963
bladder_urothelial	primary_cancer	TCGA-ZF-AA5H-01A-11R-A39I-07	Bladder Urothelial Carcinoma	183e007a-dd95-4907-a19f-410a2da7f39b	NA	0.29
blood	primary_cancer	TCGA-GR-A4D4-01A-11R-A31O-07	Lymphoid Neoplasm Diffuse Large B-cell Lymphoma	c6930a35-3476-46a0-adde-da76ee758390	NA	0.895
blood	primary_cancer	TCGA-AB-2803-03A-01T-0734-13	Acute Myeloid Leukemia	cf11b6cf-e436-4b55-83c6-94523d89057c	NA	0.031
blood	primary_cancer	TCGA-AB-2840-03A-01T-0734-13	Acute Myeloid Leukemia	8580caac-c968-4684-8bbf-e4ddac3d14c9	NA	0.467
blood	primary_cancer	TCGA-AB-3007-03A-01T-0736-13	Acute Myeloid Leukemia	00b6a02c-1b13-4b9a-b63f-400230f83973	NA	1.853
blood	primary_cancer	TCGA-AB-2891-03A-01T-0735-13	Acute Myeloid Leukemia	7cdce78a-2b96-433a-93bd-81d43311d49c	NA	0.268
blood	primary_cancer	TCGA-AB-2933-03A-01T-0734-13	Acute Myeloid Leukemia	eb0220b1-d721-4300-8882-52952b2ca03e	NA	2.195
blood	primary_cancer	TCGA-AB-2846-03A-01T-0736-13	Acute Myeloid Leukemia	12044ce3-f01a-4d65-ba68-3d5f59b67dd6	NA	0.111
blood	primary_cancer	TCGA-AB-2984-03A-01T-0734-13	Acute Myeloid Leukemia	21a756ad-2207-4ffa-9181-442c8d1dfb0f	NA	0.055
blood	primary_cancer	TCGA-AB-2833-03A-01T-0734-13	Acute Myeloid Leukemia	2138d4c5-12ca-4232-9bce-ca3c82573c55	NA	0.117
blood	primary_cancer	TCGA-AB-2820-03A-01T-0735-13	Acute Myeloid Leukemia	dd0c5140-ac73-444d-bcb9-ce80758870d1	NA	0.394
blood	primary_cancer	TCGA-AB-2982-03B-01T-0748-13	Acute Myeloid Leukemia	f46ac9e9-5e33-4a7c-bec1-0531f2cf8e79	NA	0.387
blood	primary_cancer	TCGA-AB-2877-03A-01T-0735-13	Acute Myeloid Leukemia	f1a9681b-3dc0-40a8-8b6c-619995dff0cf	NA	0.086
blood	primary_cancer	TCGA-AB-2862-03A-01T-0736-13	Acute Myeloid Leukemia	de8d1012-ae2d-46df-a0ee-8ba27b98bec0	NA	0.128
blood	primary_cancer	TCGA-AB-2867-03A-01T-0734-13	Acute Myeloid Leukemia	55c2d74b-09ea-489b-89b4-f522add07c17	NA	0.295
blood	primary_cancer	TCGA-FA-A6HN-01A-11R-A31O-07	Lymphoid Neoplasm Diffuse Large B-cell Lymphoma	f6788ba9-322e-49b0-93e4-f1b451f2a985	NA	1.679
blood	primary_cancer	TCGA-GR-7353-01A-11R-2213-07	Lymphoid Neoplasm Diffuse Large B-cell Lymphoma	e8483323-cee6-48ca-bc8d-e7b2f9e0707b	NA	0.521
blood	primary_cancer	TCGA-AB-2808-03A-01T-0734-13	Acute Myeloid Leukemia	a17d9a76-dba0-4779-9c5a-69957cf8cd69	NA	0.147
blood	primary_cancer	TCGA-AB-2818-03A-01T-0734-13	Acute Myeloid Leukemia	226e34b6-1e11-460d-8e56-dcadfc5e05ef	NA	0.205
blood	primary_cancer	TCGA-AB-2835-03A-01T-0736-13	Acute Myeloid Leukemia	2e17c25e-97fc-4aa7-8ae3-c22b87fd1953	NA	0.063
blood	primary_cancer	TCGA-AB-2887-03A-01T-0735-13	Acute Myeloid Leukemia	a1fd19b9-20e4-4696-826f-63440ccebdc1	NA	5.123
blood	primary_cancer	TCGA-AB-2853-03A-01T-0734-13	Acute Myeloid Leukemia	0b1199dc-4a2b-4063-b3c7-c17c74670ec7	NA	0.06
blood	primary_cancer	TCGA-AB-2924-03A-01T-0740-13	Acute Myeloid Leukemia	7c5141b5-b3c9-47a7-8655-1d0fca664f8d	NA	0.055
blood	primary_cancer	TCGA-FF-8046-01A-11R-2213-07	Lymphoid Neoplasm Diffuse Large B-cell Lymphoma	a0091162-1691-4b4c-990f-c58369e09548	NA	1.282
blood	primary_cancer	TCGA-G8-6326-01A-11R-2213-07	Lymphoid Neoplasm Diffuse Large B-cell Lymphoma	c66f6b85-0626-4e3a-8ec6-1cfc0a7def6b	NA	1.277
blood	primary_cancer	TCGA-AB-2944-03A-01T-0740-13	Acute Myeloid Leukemia	4975323d-208c-48d3-9acd-befa115ccc0f	NA	2.636
blood	primary_cancer	TCGA-FA-A4XK-01A-11R-A31O-07	Lymphoid Neoplasm Diffuse Large B-cell Lymphoma	95db81b0-d9e6-4cbf-b13f-7c1b92c26484	NA	0.46
blood	primary_cancer	TCGA-AB-2918-03A-01T-0740-13	Acute Myeloid Leukemia	48fc6fe0-7656-4ee5-83e9-40ed453bc317	NA	0.082
blood	primary_cancer	TCGA-AB-2875-03A-01T-0735-13	Acute Myeloid Leukemia	c7b75cbb-77a5-4083-bbcb-ddb4f6d53a60	NA	0.318
blood	primary_cancer	TCGA-AB-2813-03A-01T-0736-13	Acute Myeloid Leukemia	22273f19-ed38-4520-a851-02274c139d51	NA	0.095
blood	primary_cancer	TCGA-AB-2946-03A-01T-0740-13	Acute Myeloid Leukemia	7d20abe0-dbf6-4dc8-bbae-2b30c3ae6ee6	NA	0.061
blood	primary_cancer	TCGA-AB-2983-03A-01T-0734-13	Acute Myeloid Leukemia	8cd7cf84-1f3d-46b0-9865-f0c2e83b9cae	NA	0.343
blood	primary_cancer	TCGA-GR-A4D6-01A-11R-A31O-07	Lymphoid Neoplasm Diffuse Large B-cell Lymphoma	01dbc8b9-99eb-4bb7-8c90-6fae272ebf63	NA	1.073
blood	primary_cancer	TCGA-GR-7351-01A-11R-2213-07	Lymphoid Neoplasm Diffuse Large B-cell Lymphoma	9105777f-ef5a-4455-a762-52923fa38924	NA	0.389
blood	primary_cancer	TCGA-GS-A9TY-01A-11R-A39D-07	Lymphoid Neoplasm Diffuse Large B-cell Lymphoma	2cb30421-0335-4427-801d-221735b9beec	NA	0.413
blood	primary_cancer	TCGA-AB-3006-03A-01T-0736-13	Acute Myeloid Leukemia	9a6eca43-da53-4874-8e89-3332859d923c	NA	0.305
blood	primary_cancer	TCGA-AB-2920-03B-01T-0760-13	Acute Myeloid Leukemia	150d3bff-904e-4d00-8461-4054d18c1145	NA	0.317
blood	primary_cancer	TCGA-AB-2978-03A-01T-0734-13	Acute Myeloid Leukemia	68ef943a-ee54-42e7-8f1b-86acc6d62805	NA	2.134
blood	primary_cancer	TCGA-AB-2975-03A-01T-0734-13	Acute Myeloid Leukemia	5a499598-de5e-475e-9aac-d3a2cefe94ea	NA	0.092
blood	primary_cancer	TCGA-GS-A9TT-01A-11R-A38C-07	Lymphoid Neoplasm Diffuse Large B-cell Lymphoma	defc682b-c70e-40b5-9d8b-3dd146bc7c0e	NA	1.057
blood	primary_cancer	TCGA-FA-A82F-01A-11R-A38C-07	Lymphoid Neoplasm Diffuse Large B-cell Lymphoma	49237a86-9b3c-40ed-8b94-c0a5d9e15c82	NA	0.856
blood	primary_cancer	TCGA-AB-3011-03A-01T-0736-13	Acute Myeloid Leukemia	d2fa892c-c327-46a7-9cf1-694696508e8e	NA	0.402
blood	primary_cancer	TCGA-AB-2941-03A-01T-0740-13	Acute Myeloid Leukemia	2430d334-77d7-4863-a7f2-a7da9f9ac443	NA	0.613
blood	primary_cancer	TCGA-AB-2883-03A-01T-0734-13	Acute Myeloid Leukemia	7624503f-d5af-40f0-aeb2-84785e938904	NA	0.135
blood	primary_cancer	TCGA-AB-2931-03A-01T-0740-13	Acute Myeloid Leukemia	47ece173-3177-48dc-8a4e-df32a2a72ab7	NA	0.084
blood	primary_cancer	TCGA-AB-2863-03A-01T-0734-13	Acute Myeloid Leukemia	a34ac647-51f8-449f-962f-a72ae76f5e74	NA	0.28
blood	primary_cancer	TCGA-AB-2845-03B-01T-0748-13	Acute Myeloid Leukemia	c92e9ab3-b136-4a5a-a1d7-b0ea9860885d	NA	0.101
blood	primary_cancer	TCGA-AB-2988-03B-01T-0748-13	Acute Myeloid Leukemia	ff73268b-8688-4649-b191-251599500fd1	NA	0
blood	primary_cancer	TCGA-AB-2985-03A-01T-0734-13	Acute Myeloid Leukemia	41036960-db4e-4a66-85df-dc493a85395c	NA	0.667
blood	primary_cancer	TCGA-AB-2834-03A-01T-0734-13	Acute Myeloid Leukemia	22b2b999-44b5-4f68-9798-9a5c2bd0bec7	NA	0.073
blood	primary_cancer	TCGA-AB-2872-03A-01T-0735-13	Acute Myeloid Leukemia	1de3de07-8821-4909-8357-5cadb2506a85	NA	0.132
blood	primary_cancer	TCGA-AB-2857-03A-01T-0736-13	Acute Myeloid Leukemia	c2c4ee8a-1ecc-4ca0-8b7a-cea652d70765	NA	0.857
blood	primary_cancer	TCGA-AB-2854-03A-01T-0734-13	Acute Myeloid Leukemia	ebdcdf74-1fb2-4919-9b4d-bfd4d3de6fed	NA	0.148
blood	primary_cancer	TCGA-VB-A8QN-01A-11R-A38C-07	Lymphoid Neoplasm Diffuse Large B-cell Lymphoma	9602264c-a350-4e8b-84f0-07f5710e1f24	NA	0.311
blood	primary_cancer	TCGA-AB-2856-03A-01T-0736-13	Acute Myeloid Leukemia	6dce67ae-c2e4-47c7-b588-fd9c20e54392	NA	0.111
blood	primary_cancer	TCGA-FF-A7CX-01A-12R-A38C-07	Lymphoid Neoplasm Diffuse Large B-cell Lymphoma	50f79ec5-c16a-4c56-909a-e32439b3ce2c	NA	0.704
blood	primary_cancer	TCGA-AB-2990-03B-01T-0748-13	Acute Myeloid Leukemia	5cca1294-786d-4d72-8fb3-2b6f8c230340	NA	0.233
blood	primary_cancer	TCGA-AB-2841-03B-01T-0760-13	Acute Myeloid Leukemia	39edc387-7e56-4ed3-9968-afc7076b53e4	NA	0.111
blood	primary_cancer	TCGA-AB-3008-03A-01T-0736-13	Acute Myeloid Leukemia	b8536238-f3a3-4421-a513-c73cf6827157	NA	0.242
blood	primary_cancer	TCGA-GS-A9TQ-01A-11R-A38C-07	Lymphoid Neoplasm Diffuse Large B-cell Lymphoma	827ebf10-230a-442b-aaae-80e1e0210bb5	NA	0.344
blood	primary_cancer	TCGA-AB-2969-03A-01T-0734-13	Acute Myeloid Leukemia	69cc04fd-0288-4e42-abf9-ef0c48e5f603	NA	0.111
blood	primary_cancer	TCGA-G8-6325-01A-11R-2213-07	Lymphoid Neoplasm Diffuse Large B-cell Lymphoma	05173547-1e4d-4a6d-ac36-9aaa92488a73	NA	0.311
blood	primary_cancer	TCGA-GS-A9U3-01A-11R-A39D-07	Lymphoid Neoplasm Diffuse Large B-cell Lymphoma	c1067d6d-aaa2-4d8b-b243-6bb625980a4b	NA	1.242
blood	primary_cancer	TCGA-AB-2917-03A-01T-0734-13	Acute Myeloid Leukemia	3b0b56d3-62a5-4b3f-8e6d-ef9a25c4eb2d	NA	2.699
blood	primary_cancer	TCGA-AB-2843-03A-01T-0736-13	Acute Myeloid Leukemia	021dda83-1736-4f58-80f5-0dba9c01a57a	NA	1.812
blood	primary_cancer	TCGA-GS-A9U4-01A-11R-A39D-07	Lymphoid Neoplasm Diffuse Large B-cell Lymphoma	f89496fe-9413-4038-8e9c-c586ae83d0e1	NA	2.311
blood	primary_cancer	TCGA-AB-2810-03A-01T-0736-13	Acute Myeloid Leukemia	30d3b6ad-11d6-460d-b740-6991fb4492e6	NA	0.194
blood	primary_cancer	TCGA-AB-2903-03A-01T-0734-13	Acute Myeloid Leukemia	01fd7fab-7b3c-47ca-8ae1-d37c5a7c0556	NA	1.529
blood	primary_cancer	TCGA-RQ-A68N-01A-11R-A31O-07	Lymphoid Neoplasm Diffuse Large B-cell Lymphoma	daf79c8a-16b5-4d69-aaad-93d25ddcaac4	NA	2.218
blood	primary_cancer	TCGA-AB-2882-03A-01T-0740-13	Acute Myeloid Leukemia	41c9f19c-a6e8-41bc-8633-8ebcbb43c025	NA	1.122
blood	primary_cancer	TCGA-AB-2970-03A-01T-0734-13	Acute Myeloid Leukemia	35823279-1561-41c4-93d0-a0146d2f6172	NA	0.281
blood	primary_cancer	TCGA-AB-2912-03A-01T-0734-13	Acute Myeloid Leukemia	9ff43b12-f752-4a90-8ca9-cc7b593f8789	NA	0.31
blood	primary_cancer	TCGA-AB-2869-03A-01T-0735-13	Acute Myeloid Leukemia	e6bbc134-5165-46b6-bdba-da425d3a53e2	NA	0.341
blood	primary_cancer	TCGA-FF-8047-01A-11R-2213-07	Lymphoid Neoplasm Diffuse Large B-cell Lymphoma	6fbec533-7f89-4d12-b04c-cf92942c3f33	NA	0.609
blood	primary_cancer	TCGA-AB-2919-03A-01T-0740-13	Acute Myeloid Leukemia	cf29fca4-21d2-41f2-9c6a-9ec5b0777680	NA	0.27
blood	primary_cancer	TCGA-FF-8042-01A-11R-2213-07	Lymphoid Neoplasm Diffuse Large B-cell Lymphoma	144739d3-b2d3-493c-8731-d652f03a5b37	NA	2.99
blood	primary_cancer	TCGA-AB-2878-03A-01T-0734-13	Acute Myeloid Leukemia	a256cf81-e2bb-4d8f-b0eb-11c9084a8f2d	NA	2.173
blood	primary_cancer	TCGA-AB-2848-03A-01T-0736-13	Acute Myeloid Leukemia	b6166d5d-bc92-445f-9ce7-1c03c5796cef	NA	0.284
blood	primary_cancer	TCGA-AB-2819-03A-01T-0734-13	Acute Myeloid Leukemia	621a0e2c-ad30-44bc-a461-f2369b5915f4	NA	0.641
blood	primary_cancer	TCGA-AB-2976-03A-01T-0734-13	Acute Myeloid Leukemia	4ee5e3bf-3858-49c0-967d-3737768e6f54	NA	0.104
blood	primary_cancer	TCGA-FF-A7CQ-01A-11R-A38C-07	Lymphoid Neoplasm Diffuse Large B-cell Lymphoma	7c955c67-e0be-4c07-b0e9-b70da3a7f116	NA	0.813
blood	primary_cancer	TCGA-AB-2898-03A-01T-0735-13	Acute Myeloid Leukemia	1e9f282b-8163-47d0-a10a-939846582a23	NA	2.811
blood	primary_cancer	TCGA-GS-A9TZ-01A-11R-A39D-07	Lymphoid Neoplasm Diffuse Large B-cell Lymphoma	9a66e6e2-7888-47c8-9655-9952d9ac546f	NA	1.515
blood	primary_cancer	TCGA-AB-2839-03A-01T-0734-13	Acute Myeloid Leukemia	a669f8c3-6e25-448b-b10d-b9f46fd2cf8b	NA	0.088
blood	primary_cancer	TCGA-FM-8000-01A-11R-2213-07	Lymphoid Neoplasm Diffuse Large B-cell Lymphoma	a35b6840-486a-4384-a714-48f1c4fe4f04	NA	0.611
blood	primary_cancer	TCGA-AB-2916-03A-01T-0734-13	Acute Myeloid Leukemia	eda1118e-aec5-45c9-a6d5-ee3a92274c73	NA	0.352
blood	primary_cancer	TCGA-AB-2879-03A-01T-0735-13	Acute Myeloid Leukemia	56fd8305-a053-4841-b85c-00c54ecc4b20	NA	0.024
blood	primary_cancer	TCGA-FA-A7DS-01A-11R-A38C-07	Lymphoid Neoplasm Diffuse Large B-cell Lymphoma	c221049a-13bf-46fa-a049-20b853ea4091	NA	0.291
blood	primary_cancer	TCGA-FF-8043-01A-11R-2213-07	Lymphoid Neoplasm Diffuse Large B-cell Lymphoma	f43a92ce-fc88-4e40-be91-0b5641ad844e	NA	0.635
blood	primary_cancer	TCGA-AB-2896-03B-01T-0751-13	Acute Myeloid Leukemia	57356512-14d3-46f8-8086-aaba347d5a9e	NA	0.154
blood	primary_cancer	TCGA-AB-2939-03A-01T-0740-13	Acute Myeloid Leukemia	5c9fdcee-9898-41ae-a8ad-ff73f4f97d74	NA	0.283
blood	primary_cancer	TCGA-AB-2885-03A-01T-0735-13	Acute Myeloid Leukemia	bfebb908-3a00-4dbe-8915-fc2f03243caf	NA	2.633
blood	primary_cancer	TCGA-AB-2929-03A-01T-0735-13	Acute Myeloid Leukemia	70ae403a-04f1-41eb-9618-7ba61c2beaa9	NA	4.85
blood	primary_cancer	TCGA-AB-2915-03A-01T-0740-13	Acute Myeloid Leukemia	377a93ad-208a-4e72-8174-ecbd11b4bc2f	NA	0.464
blood	primary_cancer	TCGA-AB-3002-03A-01T-0736-13	Acute Myeloid Leukemia	4342e389-a7d4-472e-a53a-056ed81b4189	NA	0.665
blood	primary_cancer	TCGA-AB-2865-03A-01T-0736-13	Acute Myeloid Leukemia	9f52b7f0-ca6c-4988-8fe1-59cf84c54963	NA	1.132
blood	primary_cancer	TCGA-AB-2900-03A-01T-0735-13	Acute Myeloid Leukemia	d66de7ac-52a7-48a1-8531-fe1bd8bda8fc	NA	0.115
blood	primary_cancer	TCGA-AB-2932-03A-01T-0740-13	Acute Myeloid Leukemia	b2bf603b-c29b-4899-b404-e4c8a9f6ab3c	NA	0.116
blood	primary_cancer	TCGA-FA-A4BB-01A-11R-A31O-07	Lymphoid Neoplasm Diffuse Large B-cell Lymphoma	d4923060-b733-42cb-ab55-b43a2c9a9151	NA	0.518
blood	primary_cancer	TCGA-AB-2965-03A-01T-0734-13	Acute Myeloid Leukemia	b98567ce-e2ea-4fb5-b13b-82b9da1ff9f0	NA	0.141
blood	primary_cancer	TCGA-AB-2812-03A-01T-0734-13	Acute Myeloid Leukemia	2025c509-fad1-4f60-a6aa-904e9adfe26a	NA	0.036
blood	primary_cancer	TCGA-AB-2914-03A-01T-0734-13	Acute Myeloid Leukemia	00ff6255-9a10-44f8-9c70-caad5dffa1ad	NA	0.151
blood	primary_cancer	TCGA-AB-2890-03A-01T-0735-13	Acute Myeloid Leukemia	432f099f-493e-4b7a-b8db-6287fd45dc46	NA	0.27
blood	primary_cancer	TCGA-AB-2901-03A-01T-0735-13	Acute Myeloid Leukemia	845a90be-5783-4cfc-a8bb-91e84224cbea	NA	0.273
blood	primary_cancer	TCGA-AB-2815-03A-01T-0734-13	Acute Myeloid Leukemia	8fcd3e5d-53b5-4682-8885-7481662f7aa8	NA	0.073
blood	primary_cancer	TCGA-AB-2821-03A-01T-0735-13	Acute Myeloid Leukemia	429bf13b-43d6-4138-ac6b-864931481386	NA	0.926
blood	primary_cancer	TCGA-AB-2817-03A-01T-0736-13	Acute Myeloid Leukemia	7432a579-62b1-49e2-a9c8-21381bdb9653	NA	3.684
blood	primary_cancer	TCGA-AB-3001-03A-01T-0736-13	Acute Myeloid Leukemia	8077c678-ab75-45a4-93c7-3250aeb9e529	NA	0.66
blood	primary_cancer	TCGA-FF-A7CW-01A-11R-A38C-07	Lymphoid Neoplasm Diffuse Large B-cell Lymphoma	153f39e2-7b24-47c4-83ac-18a4f7441928	NA	0.841
blood	primary_cancer	TCGA-AB-2986-03A-01T-0734-13	Acute Myeloid Leukemia	cecfa4f0-a6e2-4e48-a331-edaf736ae236	NA	0.067
blood	primary_cancer	TCGA-AB-2868-03A-01T-0736-13	Acute Myeloid Leukemia	dd0a4e1c-4c48-4692-8f2b-6807166bfc35	NA	1.221
blood	primary_cancer	TCGA-AB-2972-03A-01T-0734-13	Acute Myeloid Leukemia	fd04b046-d8fe-4d47-8671-ebd0cf5bcd8d	NA	0.737
blood	primary_cancer	TCGA-GR-A4D5-01A-11R-A31O-07	Lymphoid Neoplasm Diffuse Large B-cell Lymphoma	0e814275-e5f4-4071-a65f-58eac29774ee	NA	1.025
blood	primary_cancer	TCGA-AB-2836-03A-01T-0736-13	Acute Myeloid Leukemia	fa956173-6efd-4e22-90a6-7094af399077	NA	0.146
blood	primary_cancer	TCGA-AB-2967-03A-01T-0734-13	Acute Myeloid Leukemia	b0882835-e41b-46f5-95a2-2f2e8e6a7f17	NA	0.064
blood	primary_cancer	TCGA-AB-2938-03A-01T-0736-13	Acute Myeloid Leukemia	50a1ffdb-be36-4503-a038-af3255e59738	NA	3.151
blood	primary_cancer	TCGA-AB-2871-03A-01T-0735-13	Acute Myeloid Leukemia	f45470e7-232e-44d4-802f-69f78b64b509	NA	0.627
blood	primary_cancer	TCGA-FA-A7Q1-01A-11R-A38C-07	Lymphoid Neoplasm Diffuse Large B-cell Lymphoma	d6edbae7-9967-4bf5-9fcf-433dc71b35f8	NA	3.56
blood	primary_cancer	TCGA-AB-2952-03B-01T-0760-13	Acute Myeloid Leukemia	d7ea51ae-af66-4b6e-b2f2-f0d08a9adbe4	NA	0.451
blood	primary_cancer	TCGA-GS-A9TW-01A-11R-A38C-07	Lymphoid Neoplasm Diffuse Large B-cell Lymphoma	64585cbf-917f-4d28-8b42-b085e7cd7e67	NA	2.802
blood	primary_cancer	TCGA-AB-2979-03B-01T-0760-13	Acute Myeloid Leukemia	b7c7d623-3ae5-47b1-a934-12f92f171798	NA	0.1
blood	primary_cancer	TCGA-AB-2825-03A-01T-0736-13	Acute Myeloid Leukemia	9dc3ce13-35d1-457a-9849-f081533cd1f4	NA	0.03
blood	primary_cancer	TCGA-AB-2930-03A-01T-0740-13	Acute Myeloid Leukemia	f3609312-e01a-4127-b764-12a0db117e65	NA	0.117
blood	primary_cancer	TCGA-AB-2934-03A-01T-0740-13	Acute Myeloid Leukemia	d2e40a2e-1e8f-4bf5-b000-63ef081f93da	NA	0.478
blood	primary_cancer	TCGA-AB-2806-03A-01T-0734-13	Acute Myeloid Leukemia	c7de6e9e-e564-4530-9e53-ed55b6f7a3ea	NA	0.121
blood	primary_cancer	TCGA-AB-2881-03A-01T-0735-13	Acute Myeloid Leukemia	af389bfe-c693-4763-a719-8f74f265e6ae	NA	0.086
blood	primary_cancer	TCGA-AB-3009-03A-01T-0736-13	Acute Myeloid Leukemia	e9878313-30bf-4db5-b343-57a867d58441	NA	1.312
blood	primary_cancer	TCGA-AB-2995-03A-01T-0735-13	Acute Myeloid Leukemia	b3abef48-47a1-4b82-988d-80052aaa0a0c	NA	5.998
blood	primary_cancer	TCGA-FF-8041-01A-11R-2213-07	Lymphoid Neoplasm Diffuse Large B-cell Lymphoma	40024e0a-a264-4dd8-9138-9a468b9c12ca	NA	0.625
blood	primary_cancer	TCGA-AB-2943-03A-01T-0740-13	Acute Myeloid Leukemia	d7f9c7b1-61da-43f1-b410-233b9e14433f	NA	0.64
blood	primary_cancer	TCGA-AB-2948-03A-01T-0740-13	Acute Myeloid Leukemia	93841a09-5d68-4568-a5d2-2c18cb808084	NA	0.307
blood	primary_cancer	TCGA-AB-2998-03A-01T-0735-13	Acute Myeloid Leukemia	27f28410-7475-482e-9d64-7beb83e749c1	NA	0.225
blood	primary_cancer	TCGA-AB-2927-03A-01T-0740-13	Acute Myeloid Leukemia	472954ee-33c6-445e-a39c-d5c1bdecb8c0	NA	1.899
blood	primary_cancer	TCGA-AB-2861-03A-01T-0736-13	Acute Myeloid Leukemia	f6389db5-85f4-47d1-8067-2d77f2c3ebad	NA	0.046
blood	primary_cancer	TCGA-AB-2936-03A-01T-0740-13	Acute Myeloid Leukemia	e32ce52e-ddd6-44cf-8bae-ff766318a6ad	NA	0.894
blood	primary_cancer	TCGA-AB-2899-03A-01T-0736-13	Acute Myeloid Leukemia	ceb6b0fe-434e-4f4f-9352-f4626fc6af3a	NA	3.161
blood	primary_cancer	TCGA-AB-2851-03A-01T-0736-13	Acute Myeloid Leukemia	5c831a95-27e2-4c1c-8751-b589013cfffe	NA	0.089
blood	primary_cancer	TCGA-AB-2874-03A-01T-0735-13	Acute Myeloid Leukemia	9990b280-4f34-4a01-9d47-e0b26e6dc171	NA	0.112
blood	primary_cancer	TCGA-AB-2842-03A-01T-0734-13	Acute Myeloid Leukemia	971ad3e7-9df0-40a9-b1b3-2d9b907ccbc9	NA	0.296
blood	primary_cancer	TCGA-FA-8693-01A-11R-2404-07	Lymphoid Neoplasm Diffuse Large B-cell Lymphoma	74108a37-6306-4389-93c2-b2d306ad6709	NA	0.238
blood	primary_cancer	TCGA-AB-2955-03A-01T-0734-13	Acute Myeloid Leukemia	43b0d40e-701f-470f-9701-6541cdfc8189	NA	0.055
blood	primary_cancer	TCGA-AB-2894-03A-01T-0734-13	Acute Myeloid Leukemia	d4322485-4acc-42d8-909d-341141cd32aa	NA	0.083
blood	primary_cancer	TCGA-AB-2973-03A-01T-0734-13	Acute Myeloid Leukemia	30b07cb9-4218-4900-8094-dbd02d1df8f2	NA	0.158
blood	primary_cancer	TCGA-AB-2855-03A-01T-0736-13	Acute Myeloid Leukemia	2d2b05da-2402-42f6-9d19-8bc441f9136e	NA	0.335
blood	primary_cancer	TCGA-AB-2954-03A-01T-0736-13	Acute Myeloid Leukemia	ef5f5fa9-7bf4-443f-8fc9-e79a5e4c7339	NA	0.109
blood	primary_cancer	TCGA-AB-2849-03A-01T-0734-13	Acute Myeloid Leukemia	648d8f6e-f4b4-48f0-a997-b2e24b6f37ba	NA	4.528
blood	primary_cancer	TCGA-RQ-A6JB-01A-11R-A31O-07	Lymphoid Neoplasm Diffuse Large B-cell Lymphoma	2b22fd4d-014d-441f-a4d3-1502f03e931c	NA	0.521
blood	primary_cancer	TCGA-AB-2980-03A-01T-0734-13	Acute Myeloid Leukemia	609919e1-14c5-460e-b143-283ffb4744a7	NA	0.531
blood	primary_cancer	TCGA-AB-2830-03A-01T-0736-13	Acute Myeloid Leukemia	b48d6b95-af5b-4dda-8fc4-aea0abf37a97	NA	0.251
blood	primary_cancer	TCGA-AB-2950-03A-01T-0735-13	Acute Myeloid Leukemia	50d51073-4d46-408d-a9da-a61c33d5f91c	NA	0.252
blood	primary_cancer	TCGA-AB-2940-03A-01T-0736-13	Acute Myeloid Leukemia	05fa98c4-addc-498f-aaa4-47a7433086bd	NA	0.145
blood	primary_cancer	TCGA-AB-2824-03A-01T-0736-13	Acute Myeloid Leukemia	c658c261-7583-46bf-b04b-248f493682d1	NA	1.181
blood	primary_cancer	TCGA-AB-2928-03A-01T-0740-13	Acute Myeloid Leukemia	f500cfc3-7039-4767-a16e-ee8cd84e6eaf	NA	2.014
blood	primary_cancer	TCGA-AB-2822-03A-01T-0734-13	Acute Myeloid Leukemia	c609bff4-cf25-4744-b3c6-79b57bb503f3	NA	0.148
blood	primary_cancer	TCGA-AB-2977-03B-01T-0760-13	Acute Myeloid Leukemia	06abdf97-fd96-4e04-9957-a37daf8818d1	NA	0.195
blood	primary_cancer	TCGA-AB-2904-03A-01T-0734-13	Acute Myeloid Leukemia	7832d002-0693-42a7-b774-4775b2bb26bd	NA	0.405
blood	primary_cancer	TCGA-AB-2859-03A-01T-0736-13	Acute Myeloid Leukemia	cec14d18-3a6a-425e-93a8-e532765f1bd0	NA	1.93
blood	primary_cancer	TCGA-AB-2921-03A-01T-0740-13	Acute Myeloid Leukemia	bfee6555-351f-454e-8979-063e820859e9	NA	0.261
blood	primary_cancer	TCGA-GS-A9TV-01A-11R-A38C-07	Lymphoid Neoplasm Diffuse Large B-cell Lymphoma	fe20123e-6e24-4900-97b1-60965fe89c8c	NA	1.173
blood	primary_cancer	TCGA-AB-2925-03A-01T-0735-13	Acute Myeloid Leukemia	9fe5315f-9e30-4ffc-86a3-dc94450ac4b4	NA	0.073
blood	primary_cancer	TCGA-AB-2816-03A-01T-0734-13	Acute Myeloid Leukemia	4c83b346-d830-4678-8d83-2f0b2a7689ce	NA	0
blood	primary_cancer	TCGA-AB-2805-03A-01T-0734-13	Acute Myeloid Leukemia	68b21b18-e5b8-473a-85a3-40433a1bfb65	NA	0.19
blood	primary_cancer	TCGA-AB-2886-03A-01T-0735-13	Acute Myeloid Leukemia	de52816f-8c8e-4ac6-8256-48f3346a8e99	NA	0.38
blood	primary_cancer	TCGA-AB-2987-03A-01T-0734-13	Acute Myeloid Leukemia	54c440f7-c817-48e1-86cf-0303f28473ca	NA	0.419
blood	primary_cancer	TCGA-AB-2909-03A-01T-0744-13	Acute Myeloid Leukemia	77952b61-6b89-4285-9443-a41246a7d8f2	NA	0.037
blood	primary_cancer	TCGA-AB-3012-03A-01T-0736-13	Acute Myeloid Leukemia	138387ae-2250-4c4f-8f9c-407e8f2251d9	NA	0.377
blood	primary_cancer	TCGA-AB-2971-03A-01T-0734-13	Acute Myeloid Leukemia	817e629a-c7ef-4c40-abfc-1298299f518a	NA	0.481
blood	primary_cancer	TCGA-AB-2897-03A-01T-0735-13	Acute Myeloid Leukemia	eb3635e8-c942-411f-900c-05c10f865be3	NA	0.185
blood	primary_cancer	TCGA-AB-2860-03A-01T-0736-13	Acute Myeloid Leukemia	4ca4431a-6ccb-4501-b245-7462602d3d93	NA	0.412
blood	primary_cancer	TCGA-G8-6909-01A-11R-2213-07	Lymphoid Neoplasm Diffuse Large B-cell Lymphoma	8c3c10a3-0fb4-4307-88ab-c8a99d0102cf	NA	0.678
blood	primary_cancer	TCGA-GR-A4D9-01B-11R-A31O-07	Lymphoid Neoplasm Diffuse Large B-cell Lymphoma	19aaa769-e404-4ecc-9e39-e07bfc9ba89c	NA	0.495
blood	primary_cancer	TCGA-FA-A86F-01A-11R-A38C-07	Lymphoid Neoplasm Diffuse Large B-cell Lymphoma	a3ca2450-1f4e-4372-bdd4-46f83e2e9602	NA	1.489
blood	primary_cancer	TCGA-AB-2847-03A-01T-0736-13	Acute Myeloid Leukemia	d1356934-85ec-4b67-9dc1-73a3dc1f7e1b	NA	5.992
blood	primary_cancer	TCGA-AB-2964-03A-01T-0734-13	Acute Myeloid Leukemia	4ede5304-b854-4da4-a783-03af25b9be4d	NA	0.544
blood	primary_cancer	TCGA-AB-2811-03B-01T-0760-13	Acute Myeloid Leukemia	4b5408a2-25a2-4a9a-8298-c1c78e6fd358	NA	0.027
blood	primary_cancer	TCGA-AB-2823-03A-01T-0736-13	Acute Myeloid Leukemia	7ba7b505-ae01-4de7-9670-caddcfc8f256	NA	0.268
blood	primary_cancer	TCGA-AB-2880-03A-01T-0735-13	Acute Myeloid Leukemia	1f5ae391-430a-4d9c-ac9e-f1694a464521	NA	0.04
blood	primary_cancer	TCGA-GS-A9TX-01A-11R-A38C-07	Lymphoid Neoplasm Diffuse Large B-cell Lymphoma	17b87815-5cb8-49c1-a09f-d3e99a6c19c1	NA	1.976
blood	primary_cancer	TCGA-FF-8062-01A-11R-2213-07	Lymphoid Neoplasm Diffuse Large B-cell Lymphoma	594f57f1-a1a9-4a3d-ae9e-fa601a29c917	NA	0.829
blood	primary_cancer	TCGA-AB-2876-03A-01T-0734-13	Acute Myeloid Leukemia	cc1981b9-3438-4021-812b-66ab8ee8d069	NA	0.082
blood	primary_cancer	TCGA-AB-2992-03A-01T-0735-13	Acute Myeloid Leukemia	ae8a8184-733a-4e49-8f7a-d3e4181625ba	NA	0.661
blood	primary_cancer	TCGA-AB-2866-03A-01T-0736-13	Acute Myeloid Leukemia	2256ffdd-fa23-439d-8020-9328c35a8fed	NA	0.105
blood	primary_cancer	TCGA-AB-2828-03A-01T-0734-13	Acute Myeloid Leukemia	b1ceb150-3d23-4723-a9cc-a7663bdeef2a	NA	0.133
blood	primary_cancer	TCGA-AB-2911-03A-01T-0734-13	Acute Myeloid Leukemia	1d94c57f-28f4-4897-8682-0c114bddb6d4	NA	0.219
blood	primary_cancer	TCGA-AB-2893-03A-01T-0734-13	Acute Myeloid Leukemia	997286d1-2781-44cc-af9e-464b6df29b9b	NA	0.105
blood	primary_cancer	TCGA-AB-2889-03A-01T-0735-13	Acute Myeloid Leukemia	dc295eca-c4e4-4f1a-9afd-c727f3aafcfb	NA	0.165
blood	primary_cancer	TCGA-AB-2837-03A-01T-0736-13	Acute Myeloid Leukemia	c614f2f5-82fd-4b45-a426-b1c23f4c426d	NA	0
blood	primary_cancer	TCGA-AB-2884-03A-01T-0735-13	Acute Myeloid Leukemia	9df9eccb-8ce5-4989-b201-7b7c464da603	NA	0.19
blood	primary_cancer	TCGA-FA-A6HO-01A-11R-A31O-07	Lymphoid Neoplasm Diffuse Large B-cell Lymphoma	52ece957-8f21-4f13-a61d-7b2e1c850ef5	NA	1.05
blood	primary_cancer	TCGA-AB-2996-03A-01T-0735-13	Acute Myeloid Leukemia	e983d71e-a9ae-4128-8361-eb9cb83046d9	NA	0.967
blood	primary_cancer	TCGA-AB-2838-03A-01T-0736-13	Acute Myeloid Leukemia	59920d86-9c7e-48bc-bc9a-2d42c18a7d5b	NA	0.252
blood	primary_cancer	TCGA-AB-2826-03A-01T-0734-13	Acute Myeloid Leukemia	3cad09f6-0bc6-4730-97cd-fea477ac70a7	NA	0.085
blood	primary_cancer	TCGA-AB-2873-03A-01T-0735-13	Acute Myeloid Leukemia	a3875d98-994f-4e32-b89f-49cd456f58e6	NA	0.229
blood	primary_cancer	TCGA-AB-2956-03A-01T-0740-13	Acute Myeloid Leukemia	096a811a-73e3-4875-84dc-9d3e518d8264	NA	0.1
blood	primary_cancer	TCGA-AB-2870-03A-01T-0735-13	Acute Myeloid Leukemia	ff3a7835-bdd2-4052-8e87-59a098bd5678	NA	0.525
blood	primary_cancer	TCGA-AB-2844-03A-01T-0736-13	Acute Myeloid Leukemia	6afe831d-f961-4d4c-8751-58f27efd362b	NA	0.083
blood	primary_cancer	TCGA-FF-A7CR-01A-11R-A38C-07	Lymphoid Neoplasm Diffuse Large B-cell Lymphoma	bc8a3747-bd29-4388-94b9-74d92b6db3a3	NA	1.829
blood	primary_cancer	TCGA-AB-2892-03A-01T-0734-13	Acute Myeloid Leukemia	bacb9ee1-573e-4e08-a70e-09c9795ed1ad	NA	0.191
blood	primary_cancer	TCGA-RQ-AAAT-01A-11R-A39D-07	Lymphoid Neoplasm Diffuse Large B-cell Lymphoma	7f531556-60c1-482c-9c1d-4a9ab00c7eac	NA	0.552
blood	primary_cancer	TCGA-AB-2959-03A-01T-0734-13	Acute Myeloid Leukemia	bf58f68d-1ab1-49a2-b5c7-c72404201de1	NA	0.779
blood	primary_cancer	TCGA-AB-2913-03A-01T-0734-13	Acute Myeloid Leukemia	1c2fc866-8b41-42be-b012-126a3d08582d	NA	0.074
blood	primary_cancer	TCGA-AB-2807-03A-01T-0734-13	Acute Myeloid Leukemia	84a14545-9ee6-412d-ab11-fadb6135d9c8	NA	2.055
blood	primary_cancer	TCGA-G8-6906-01A-11R-2213-07	Lymphoid Neoplasm Diffuse Large B-cell Lymphoma	a8ed4489-1005-488c-9e8e-274b2cfd8a83	NA	0.13
blood	primary_cancer	TCGA-AB-3005-03A-01T-0736-13	Acute Myeloid Leukemia	e88e851a-4c1d-4145-9ad9-84891f84211b	NA	0.213
blood	primary_cancer	TCGA-AB-2888-03B-01T-0748-13	Acute Myeloid Leukemia	ea0cd816-5851-44b4-a2c4-a35b469257a8	NA	0.204
blood	primary_cancer	TCGA-GS-A9TU-01A-11R-A38C-07	Lymphoid Neoplasm Diffuse Large B-cell Lymphoma	fbe73185-19de-4d0e-af7c-589ca5ffebf6	NA	1.515
blood	primary_cancer	TCGA-AB-2895-03A-01T-0735-13	Acute Myeloid Leukemia	03c1cadb-e43e-44d1-8917-bb1fabd45cd8	NA	0.37
blood	primary_cancer	TCGA-AB-2908-03A-01T-0740-13	Acute Myeloid Leukemia	96e52034-13ad-482d-a9da-6816befaa501	NA	0.655
blood	primary_cancer	TCGA-AB-2991-03A-01T-0735-13	Acute Myeloid Leukemia	01d412c3-5fcd-4ab6-96db-a2ecfb6e298f	NA	0.666
blood	primary_cancer	TCGA-AB-2966-03A-01T-0734-13	Acute Myeloid Leukemia	3cddfc56-b101-46b6-bb24-9f06d0836968	NA	0.117
blood	primary_cancer	TCGA-AB-2814-03A-01T-0734-13	Acute Myeloid Leukemia	cfc8becb-1f3d-4dd3-a59b-968370de8ad6	NA	1.646
blood	primary_cancer	TCGA-AB-2994-03A-01T-0735-13	Acute Myeloid Leukemia	2a62ebc6-872e-4767-922b-f5763177e9cf	NA	0.149
blood	primary_cancer	TCGA-AB-2858-03A-01T-0736-13	Acute Myeloid Leukemia	1f60696b-1f1c-4de8-a3e3-0c81be3ced94	NA	0.303
blood	primary_cancer	TCGA-G8-6907-01A-11R-2213-07	Lymphoid Neoplasm Diffuse Large B-cell Lymphoma	5bce51af-fa6e-4fd2-b3b0-114eb8a275a9	NA	0.467
blood	primary_cancer	TCGA-G8-6914-01A-11R-2213-07	Lymphoid Neoplasm Diffuse Large B-cell Lymphoma	d15202c0-099f-46c9-99c0-cc6bdf3e82b1	NA	1.2
blood	primary_cancer	TCGA-AB-2981-03B-01T-0748-13	Acute Myeloid Leukemia	eba69ce3-533e-45a9-84c1-1c2b19ba0147	NA	0.079
blood	primary_cancer	TCGA-AB-2937-03A-01T-0734-13	Acute Myeloid Leukemia	0b290646-25c8-406c-82bf-ec54b2824e73	NA	1.838
blood	primary_cancer	TCGA-AB-2910-03A-01T-0740-13	Acute Myeloid Leukemia	6f02f489-a38f-46d6-97cb-ff5b0c4cc353	NA	0.141
blood	primary_cancer	TCGA-AB-2949-03B-01T-0748-13	Acute Myeloid Leukemia	db6b61bb-84cd-4f77-ab6f-14aa0b75c8d1	NA	2.212
blood	primary_cancer	TCGA-AB-2832-03A-01T-0736-13	Acute Myeloid Leukemia	57d39a70-ae62-47a6-8489-01d79f78751c	NA	0.153
blood	primary_cancer	TCGA-AB-2935-03A-01T-0740-13	Acute Myeloid Leukemia	c0e22606-de4b-492e-95ba-2ec748337b2e	NA	1.164
blood	primary_cancer	TCGA-AB-3000-03A-01T-0736-13	Acute Myeloid Leukemia	d3591bf4-41ab-43ad-89ec-cf189892a2f4	NA	0.073
blood	primary_cancer	TCGA-AB-2999-03B-01T-0748-13	Acute Myeloid Leukemia	bc86f52d-6341-4ce9-8ac3-57b48be515d5	NA	0.334
blood	primary_cancer	TCGA-G8-6324-01A-11R-2213-07	Lymphoid Neoplasm Diffuse Large B-cell Lymphoma	803db8de-5812-4dca-9e0e-aaa49096fd25	NA	0.754
blood	primary_cancer	TCGA-AB-2942-03A-01T-0734-13	Acute Myeloid Leukemia	bbe18e41-d1bb-4ef2-b101-35b67f5c5a63	NA	0.111
blood	primary_cancer	TCGA-FF-8061-01A-11R-2213-07	Lymphoid Neoplasm Diffuse Large B-cell Lymphoma	953e90e7-a9a6-47d6-bd4a-fe18e780b9e0	NA	0.092
blood	primary_cancer	TCGA-AB-2963-03A-01T-0734-13	Acute Myeloid Leukemia	6c9bf29f-0e69-4792-8fa4-dc2626a4bd93	NA	0.13
brain	primary_cancer	TCGA-S9-A89V-01A-11R-A36H-07	Brain Lower Grade Glioma	b5f07863-11fa-46c7-a915-7f643ac57711	NA	60.686
brain	primary_cancer	TCGA-S9-A7IY-01A-11R-A34F-07	Brain Lower Grade Glioma	10f6eea5-bfb0-4203-92c8-5572a81d0b8e	NA	70.033
brain	primary_cancer	TCGA-FG-A60L-01A-12R-A31N-07	Brain Lower Grade Glioma	d215a4d3-4990-4771-8665-de92aaeb454b	NA	36.1
brain	primary_cancer	TCGA-QH-A6X5-01A-12R-A32Q-07	Brain Lower Grade Glioma	d6e91e40-d498-45eb-8cc7-e191c50f077e	NA	56.966
brain	primary_cancer	TCGA-DU-8164-01A-11R-2256-07	Brain Lower Grade Glioma	7fcd4e64-e758-4418-b19e-02a4e7ee1fef	NA	81.043
brain	primary_cancer	TCGA-FG-8181-01A-11R-2256-07	Brain Lower Grade Glioma	8d64e025-7822-4888-bd98-dd39ab8c73f1	NA	20.468
brain	primary_cancer	TCGA-DU-A7TD-01A-12R-A34F-07	Brain Lower Grade Glioma	03eb7467-7dd5-4228-86b9-7b3b31ba1496	NA	81.333
brain	primary_cancer	TCGA-HT-8106-01A-11R-2404-07	Brain Lower Grade Glioma	1b95fcab-d55c-49b8-b3eb-0b156ca02812	NA	24.413
brain	primary_cancer	TCGA-S9-A6WI-01A-21R-A33Z-07	Brain Lower Grade Glioma	fc484082-81a8-4feb-bd85-c0f067ad2f4f	NA	25.524
brain	primary_cancer	TCGA-FG-A713-01A-11R-A32Q-07	Brain Lower Grade Glioma	570cae57-25b0-401d-a911-da8d44e8b291	NA	24.671
brain	primary_cancer	TCGA-DU-7015-01A-11R-2027-07	Brain Lower Grade Glioma	c036ae2f-3de5-49ba-a7f6-32d8c5d78a4e	NA	103.029
brain	primary_cancer	TCGA-HW-8319-01A-11R-2404-07	Brain Lower Grade Glioma	196025a7-8bda-4361-b2f6-8ac98c753564	NA	98.108
brain	primary_cancer	TCGA-S9-A6U0-01A-12R-A32Q-07	Brain Lower Grade Glioma	f64b490b-d38e-4c20-aa98-a6c636d81123	NA	26.156
brain	primary_cancer	TCGA-HW-8322-01A-11R-2404-07	Brain Lower Grade Glioma	83071fd2-bdb5-4135-97cd-dc6d68120a02	NA	67.2
brain	primary_cancer	TCGA-32-2616-01A-01R-1850-01	Glioblastoma multiforme	6ced4dca-5999-4063-90e9-6ba1851ab054	NA	32.747
brain	primary_cancer	TCGA-DU-6396-01A-11R-1708-07	Brain Lower Grade Glioma	128dd28f-7f33-4fc2-a131-e64adbab6ba8	NA	44.141
brain	primary_cancer	TCGA-06-0184-01A-01R-1849-01	Glioblastoma multiforme	7522ddf3-0d35-4085-9f94-1ca2e38aa804	NA	22.199
brain	primary_cancer	TCGA-HT-A618-01A-11R-A29R-07	Brain Lower Grade Glioma	08a9d6fb-2367-4bd2-b828-c1d970dc62a8	NA	42.135
brain	primary_cancer	TCGA-P5-A781-01A-11R-A32Q-07	Brain Lower Grade Glioma	7e4fcbe3-07e2-4f26-8a7d-5655d0be0f6a	NA	72.112
brain	primary_cancer	TCGA-DU-7008-01A-11R-2027-07	Brain Lower Grade Glioma	a5a2a97b-91dd-45a8-b76c-05d6d40cbe9f	NA	68.805
brain	primary_cancer	TCGA-DB-A64W-01A-11R-A29R-07	Brain Lower Grade Glioma	b8ee7519-8052-4ac2-b331-7196e3f0d30f	NA	47.802
brain	primary_cancer	TCGA-S9-A6WP-01A-12R-A34F-07	Brain Lower Grade Glioma	6c13f651-a7da-46b9-b422-7fa8f314b901	NA	55.839
brain	primary_cancer	TCGA-27-1830-01A-01R-1850-01	Glioblastoma multiforme	f2ab5972-46e6-4d13-bf8e-dffc1dc8a9e9	NA	33.247
brain	primary_cancer	TCGA-28-1753-01A-01R-1850-01	Glioblastoma multiforme	23b23702-8e0f-4b4c-ad92-ce7ea44939e6	NA	38.088
brain	primary_cancer	TCGA-HT-7482-01A-11R-2027-07	Brain Lower Grade Glioma	ba0661be-f70f-4273-af82-911f189b2adb	NA	65.923
brain	primary_cancer	TCGA-DU-7011-01A-11R-2027-07	Brain Lower Grade Glioma	ef7cd9b2-f363-40db-bdc1-a07c10e31fd2	NA	65.894
brain	primary_cancer	TCGA-QH-A6CV-01A-11R-A31N-07	Brain Lower Grade Glioma	3dd53b9a-6683-42ed-9594-5458c655cf8f	NA	24.653
brain	primary_cancer	TCGA-DB-A64P-01A-11R-A29R-07	Brain Lower Grade Glioma	5635d2de-4a0b-4988-8ff7-2056857d0d34	NA	52.182
brain	primary_cancer	TCGA-27-1834-01A-01R-1850-01	Glioblastoma multiforme	5f19c351-94d4-4164-aa7e-4a0f44640cbb	NA	38.435
brain	primary_cancer	TCGA-DB-A4XD-01A-11R-A27Q-07	Brain Lower Grade Glioma	e948362f-2ae6-437b-a01b-6a1026a8da72	NA	62.735
brain	primary_cancer	TCGA-TM-A84Q-01A-11R-A36H-07	Brain Lower Grade Glioma	31cec6a7-3560-4837-a220-a34d1e45ed24	NA	51.257
brain	primary_cancer	TCGA-DB-A4XC-01A-11R-A26U-07	Brain Lower Grade Glioma	ae83a679-8155-4f3a-9c9b-a3b73c8cd332	NA	56.608
brain	primary_cancer	TCGA-06-0211-01A-01R-1849-01	Glioblastoma multiforme	6b59b1e5-4593-49f9-add7-b41e719d7af6	NA	30.022
brain	primary_cancer	TCGA-E1-A7YI-01A-11R-A34F-07	Brain Lower Grade Glioma	696dc339-8d57-4b97-bce3-7bd3b2746dcc	NA	61.025
brain	primary_cancer	TCGA-CS-6669-01A-11R-1896-07	Brain Lower Grade Glioma	f107ba9e-f52a-4a6b-b659-8dabf17c9120	NA	20.744
brain	primary_cancer	TCGA-DH-A7UV-01A-12R-A34F-07	Brain Lower Grade Glioma	ca0eaf1f-36a4-4322-b262-118d4cfc6ae2	NA	69.817
brain	primary_cancer	TCGA-06-0646-01A-01R-1849-01	Glioblastoma multiforme	d694ad12-0ae4-4bee-9f7f-0c6adf5bf09d	NA	25.276
brain	primary_cancer	TCGA-32-2615-01A-01R-1850-01	Glioblastoma multiforme	2db5af77-d0af-4c3c-bd2a-779e0a7228e0	NA	25.962
brain	metastasis	TCGA-06-0152-02A-01R-2005-01	Glioblastoma multiforme	75ed138d-252f-4179-b93f-4ae8eb2524ee	NA	31.64
brain	primary_cancer	TCGA-FG-8188-01A-11R-2256-07	Brain Lower Grade Glioma	42862121-daed-47fa-932d-3df4c9efa4cb	NA	71.513
brain	metastasis	TCGA-06-0210-02A-01R-2005-01	Glioblastoma multiforme	26200b50-c40c-4e09-89c4-083b873bcf25	NA	46.517
brain	metastasis	TCGA-FG-5965-02B-11R-A29R-07	Brain Lower Grade Glioma	013bac31-4670-460a-9108-7b4ae57a2e21	NA	28.065
brain	primary_cancer	TCGA-27-2524-01A-01R-1850-01	Glioblastoma multiforme	8604df30-9170-41e2-8dfb-2feb813807ac	NA	12.876
brain	primary_cancer	TCGA-P5-A77W-01A-11R-A32Q-07	Brain Lower Grade Glioma	4ecc68c5-c6d1-4c12-a026-1eed1a40e28d	NA	30.863
brain	primary_cancer	TCGA-DB-A75L-01A-11R-A32Q-07	Brain Lower Grade Glioma	05b85bc7-87db-49bb-85cf-e494554ab191	NA	35.45
brain	primary_cancer	TCGA-E1-A7YQ-01A-11R-A34R-07	Brain Lower Grade Glioma	0c179490-c0fc-4ac1-abdb-f5256abf1ef6	NA	24.529
brain	primary_cancer	TCGA-DB-5274-01A-01R-1470-07	Brain Lower Grade Glioma	e42fd909-d0b3-4b6d-8b2b-008ad7b7945c	NA	23.848
brain	primary_cancer	TCGA-FG-6689-01A-11R-1896-07	Brain Lower Grade Glioma	625da09e-ed21-4b10-95f2-c889171194d1	NA	50.537
brain	primary_cancer	TCGA-27-1831-01A-01R-1850-01	Glioblastoma multiforme	d577af6d-d9f1-435d-8429-73b5c5962238	NA	15.195
brain	primary_cancer	TCGA-06-0747-01A-01R-1849-01	Glioblastoma multiforme	04e97d81-96bb-40e7-9e8c-1efb19179a62	NA	36.361
brain	primary_cancer	TCGA-06-0649-01B-01R-1849-01	Glioblastoma multiforme	acb1160e-036a-4108-a9ce-d5f954191593	NA	18.501
brain	primary_cancer	TCGA-FG-A6J3-01A-11R-A31N-07	Brain Lower Grade Glioma	eba2b96d-21f8-4091-b8c4-0ef2b9c00075	NA	16.768
brain	primary_cancer	TCGA-WH-A86K-01A-11R-A36H-07	Brain Lower Grade Glioma	9102949f-fd0d-4b62-bc30-6451f6dd8fb4	NA	54.88
brain	primary_cancer	TCGA-06-5418-01A-01R-1849-01	Glioblastoma multiforme	e48c8261-5e7b-4cbe-95ed-8a7d1c356d70	NA	30.061
brain	primary_cancer	TCGA-RY-A847-01A-11R-A36H-07	Brain Lower Grade Glioma	1d7d22de-0bfc-4357-8c5a-7289aa0d97b8	NA	45.134
brain	primary_cancer	TCGA-S9-A6WN-01A-12R-A33Z-07	Brain Lower Grade Glioma	74cb268c-d8bc-44f2-8872-f176fa8221be	NA	32.812
brain	primary_cancer	TCGA-VM-A8C8-01A-11R-A36H-07	Brain Lower Grade Glioma	23a4b76d-a3d3-4206-acd5-2eab6bd4face	NA	86.768
brain	metastasis	TCGA-DU-5870-02A-12R-A36H-07	Brain Lower Grade Glioma	387f62fd-dfeb-4f05-88d1-64d8de9a031a	NA	37.49
brain	metastasis	TCGA-14-1034-02B-01R-2005-01	Glioblastoma multiforme	ee783da8-98c4-4107-8e9b-af8580ac2f24	NA	39.861
brain	primary_cancer	TCGA-DU-7300-01A-21R-2090-07	Brain Lower Grade Glioma	94bf61a3-9b70-4429-b538-a32163d186cb	NA	43.267
brain	primary_cancer	TCGA-HT-A614-01A-11R-A29R-07	Brain Lower Grade Glioma	5a3d8ba7-dea1-4155-9345-c542719b29f4	NA	69.908
brain	primary_cancer	TCGA-32-1980-01A-01R-1850-01	Glioblastoma multiforme	ebe88950-c783-4487-9bfc-ccaaeacf256c	NA	21.458
brain	primary_cancer	TCGA-06-5414-01A-01R-1849-01	Glioblastoma multiforme	051cda00-0007-4e35-9044-fd0c03c8ed4b	NA	32.213
brain	primary_cancer	TCGA-WY-A85C-01A-11R-A36H-07	Brain Lower Grade Glioma	5a4d2d74-6bf6-455c-87ad-5b51725bd04f	NA	41.473
brain	primary_cancer	TCGA-HT-7882-01A-11R-2403-07	Brain Lower Grade Glioma	ad6cc53a-1a99-4e1b-8701-9abf0c975adb	NA	11.523
brain	primary_cancer	TCGA-HW-7489-01A-11R-2027-07	Brain Lower Grade Glioma	9ebc9830-2f01-4528-bd95-ae8dfcb2c0a6	NA	50.045
brain	primary_cancer	TCGA-06-5410-01A-01R-1849-01	Glioblastoma multiforme	39580733-5ff1-43a1-b9fd-53b6f6e879bd	NA	15.95
brain	primary_cancer	TCGA-DU-A5TU-01A-11R-A28M-07	Brain Lower Grade Glioma	ac3caaa0-3464-4a39-aa98-fe0e82d6d36c	NA	51.497
brain	metastasis	TCGA-DU-6404-02A-21R-A36H-07	Brain Lower Grade Glioma	6297b8d1-8f4e-499c-b95f-422f0a574b35	NA	45.185
brain	primary_cancer	TCGA-06-5856-01A-01R-1849-01	Glioblastoma multiforme	748dc9ed-758b-43c9-af66-111f6ab3d6ce	NA	29.01
brain	primary_cancer	TCGA-DU-A7TC-01A-21R-A34R-07	Brain Lower Grade Glioma	aa0da5cf-b997-4e3e-83eb-b01e7488b714	NA	39.719
brain	primary_cancer	TCGA-14-2554-01A-01R-1850-01	Glioblastoma multiforme	fbf2f1c0-fb91-4548-8653-68021e6541f9	NA	38.137
brain	primary_cancer	TCGA-DU-8162-01A-21R-2256-07	Brain Lower Grade Glioma	c67538d7-7e64-4325-878e-53fd324a11f9	NA	27.87
brain	primary_cancer	TCGA-16-1045-01B-01R-1850-01	Glioblastoma multiforme	f4398f60-1a5f-426f-8d4c-ab52d815bb98	NA	27.333
brain	primary_cancer	TCGA-DH-A66F-01A-11R-A29R-07	Brain Lower Grade Glioma	10b6c170-88d1-4cea-87c7-b23d6810ea6a	NA	78.641
brain	primary_cancer	TCGA-P5-A5EX-01A-12R-A28M-07	Brain Lower Grade Glioma	7b4d9c91-80eb-4d3e-8e3f-76a13c7fbf76	NA	43.377
brain	primary_cancer	TCGA-06-0130-01A-01R-1849-01	Glioblastoma multiforme	cf7e2358-7542-4381-90f4-782663ddc63a	NA	6.157
brain	metastasis	TCGA-14-0736-02A-01R-2005-01	Glioblastoma multiforme	b469eb7c-723f-4870-b4e4-ebfaae7a118b	NA	14.02
brain	primary_cancer	TCGA-DB-5279-01A-03R-2347-07	Brain Lower Grade Glioma	4af34323-4cc9-4b69-b0cf-558bb9d8ee1a	NA	73.012
brain	primary_cancer	TCGA-HT-7873-01B-11R-2403-07	Brain Lower Grade Glioma	6c47a99a-ad05-4478-82fd-d57fe8f54f32	NA	105.649
brain	primary_cancer	TCGA-06-1804-01A-01R-1849-01	Glioblastoma multiforme	07775763-1931-4f95-ad0a-094a228a3770	NA	103.505
brain	primary_cancer	TCGA-E1-A7Z4-01A-11R-A34R-07	Brain Lower Grade Glioma	e53c6e65-37e8-4523-b336-d1bc89381a80	NA	130.612
brain	primary_cancer	TCGA-HT-7680-01A-11R-2256-07	Brain Lower Grade Glioma	3042bdd7-5fc9-4428-afcc-ecd76f71d68d	NA	92.901
brain	primary_cancer	TCGA-HT-A5R5-01A-11R-A28M-07	Brain Lower Grade Glioma	3d55fa54-f618-4790-840a-7d2a02ee3b3d	NA	57.083
brain	primary_cancer	TCGA-06-0211-01B-01R-1849-01	Glioblastoma multiforme	51fff807-cfea-4ff5-bd35-093b0c18f0fb	NA	36.213
brain	primary_cancer	TCGA-HT-7478-01A-11R-2027-07	Brain Lower Grade Glioma	ced731fa-332e-4c23-b3f9-2cea76a73029	NA	56.392
brain	primary_cancer	TCGA-R8-A6MK-01A-11R-A32Q-07	Brain Lower Grade Glioma	849208d7-caaf-488e-a489-5638858f6883	NA	82.997
brain	primary_cancer	TCGA-FG-A87Q-01A-11R-A36H-07	Brain Lower Grade Glioma	d1d2cb40-28df-41a6-af66-1d11168e0803	NA	49.233
brain	primary_cancer	TCGA-HT-7603-01A-21R-2090-07	Brain Lower Grade Glioma	fb8000a5-63e3-44ec-813d-e81482d53d07	NA	47.021
brain	primary_cancer	TCGA-06-5408-01A-01R-1849-01	Glioblastoma multiforme	37218c7d-74ed-43db-9556-a09006645998	NA	40.955
brain	primary_cancer	TCGA-VW-A8FI-01A-11R-A36H-07	Brain Lower Grade Glioma	9b6fc8d2-b1a5-4b8e-81d3-18258860b4b5	NA	27.465
brain	primary_cancer	TCGA-DU-6392-01A-11R-1708-07	Brain Lower Grade Glioma	d224765a-980f-4212-acf8-c38d0d9b7610	NA	31.879
brain	primary_cancer	TCGA-DU-8163-01A-11R-2256-07	Brain Lower Grade Glioma	654ea6d9-1a5b-442a-8627-5d6f4baa8460	NA	76.107
brain	primary_cancer	TCGA-HT-A619-01A-11R-A29R-07	Brain Lower Grade Glioma	56d6ee3a-08b5-41ad-8ec2-574870987201	NA	30.252
brain	primary_cancer	TCGA-S9-A6U9-01A-11R-A32Q-07	Brain Lower Grade Glioma	9070435a-8d76-4107-8d96-900db04b0d94	NA	52.937
brain	primary_cancer	TCGA-DU-5871-01A-12R-1708-07	Brain Lower Grade Glioma	e04bbaf8-d646-4c00-8d72-72fcdb073ec3	NA	63.822
brain	primary_cancer	TCGA-P5-A72Z-01A-11R-A32Q-07	Brain Lower Grade Glioma	7b9b3507-bd43-4915-8f53-89cee202ad6e	NA	65.116
brain	primary_cancer	TCGA-QH-A6X8-01A-12R-A32Q-07	Brain Lower Grade Glioma	701594b8-2848-4c06-be1b-ab49c2ca71ea	NA	64.428
brain	primary_cancer	TCGA-HT-8013-01A-11R-2403-07	Brain Lower Grade Glioma	2181e8a6-db87-49e9-ad56-582b345abcc2	NA	57.262
brain	primary_cancer	TCGA-P5-A730-01A-11R-A32Q-07	Brain Lower Grade Glioma	059686a6-baf9-4609-a26f-2d0fa3b7a685	NA	45.792
brain	primary_cancer	TCGA-HT-7688-01A-11R-2256-07	Brain Lower Grade Glioma	049ee2d6-c67a-42e2-a39d-2eb15650ca63	NA	43.031
brain	primary_cancer	TCGA-P5-A780-01A-12R-A32Q-07	Brain Lower Grade Glioma	05511b6c-4529-4081-a8aa-aeed061c5159	NA	26.608
brain	primary_cancer	TCGA-S9-A6UB-01A-21R-A33Z-07	Brain Lower Grade Glioma	0836116d-5b2e-4445-9019-a5c5ad7aac50	NA	72.697
brain	primary_cancer	TCGA-14-1823-01A-01R-1849-01	Glioblastoma multiforme	addc558d-d718-4f50-a0dc-92f7c3341f61	NA	17.808
brain	primary_cancer	TCGA-S9-A6WL-01A-21R-A33Z-07	Brain Lower Grade Glioma	e6d20c89-a4d1-4c0f-b31d-8e1262e425d5	NA	34.075
brain	primary_cancer	TCGA-S9-A6TY-01A-12R-A32Q-07	Brain Lower Grade Glioma	fcac06b5-0096-4004-b3a6-1af7c708b82d	NA	46.252
brain	primary_cancer	TCGA-QH-A6CW-01A-11R-A32Q-07	Brain Lower Grade Glioma	6cc3ae71-fe99-4dcb-b5c6-b4e8eb7b336c	NA	48.536
brain	primary_cancer	TCGA-DU-7009-01A-11R-2027-07	Brain Lower Grade Glioma	748811da-49b0-4ff6-a718-0549921871be	NA	69.338
brain	primary_cancer	TCGA-S9-A7IZ-01A-11R-A34F-07	Brain Lower Grade Glioma	dfe8bcb5-829d-4f70-8731-e3289383bc95	NA	72.571
brain	primary_cancer	TCGA-VM-A8CF-01A-11R-A36H-07	Brain Lower Grade Glioma	6f1fe75a-f3ef-4f1b-9781-e340db9bab45	NA	70.883
brain	primary_cancer	TCGA-19-1390-01A-01R-1850-01	Glioblastoma multiforme	f2a757d2-2574-4840-88ea-5ffd09d0103c	NA	29.605
brain	primary_cancer	TCGA-HT-A5R9-01A-11R-A28M-07	Brain Lower Grade Glioma	922a7345-64a7-43e8-9c11-bb0bd85dd847	NA	37.114
brain	primary_cancer	TCGA-FG-8187-01A-11R-2256-07	Brain Lower Grade Glioma	642ac0c8-44f2-452b-98d8-3ad56c82e3b1	NA	54.426
brain	primary_cancer	TCGA-12-0619-01A-01R-1849-01	Glioblastoma multiforme	d1431a36-5c68-4e6e-9aea-72afe374efd1	NA	24.801
brain	primary_cancer	TCGA-HT-7471-01A-11R-2256-07	Brain Lower Grade Glioma	80dac2db-4e32-4854-ba10-2d9aa059bf45	NA	81.947
brain	primary_cancer	TCGA-DU-7304-01A-12R-2090-07	Brain Lower Grade Glioma	9e8a108f-c2a6-4947-9512-72609d13ade1	NA	66.83
brain	primary_cancer	TCGA-DU-7306-01A-11R-2090-07	Brain Lower Grade Glioma	12113ec4-2f73-488b-9926-89f1301e1fb9	NA	60.588
brain	primary_cancer	TCGA-E1-A7YN-01A-11R-A34F-07	Brain Lower Grade Glioma	cf481f1e-9bb2-4682-ac16-31b0db7f444e	NA	45.864
brain	primary_cancer	TCGA-DH-5144-01A-01R-1470-07	Brain Lower Grade Glioma	c0a8b929-166d-4227-a0e1-fe8ab8abac11	NA	57.176
brain	primary_cancer	TCGA-26-5133-01A-01R-1850-01	Glioblastoma multiforme	e64a2789-9b0e-41ca-9447-b17d8968f4cd	NA	16.453
brain	primary_cancer	TCGA-TM-A7CF-01A-11R-A32Q-07	Brain Lower Grade Glioma	413a35b5-9151-44ca-85af-543683c8194b	NA	50.385
brain	primary_cancer	TCGA-14-0781-01B-01R-1849-01	Glioblastoma multiforme	66b268a8-8652-4efc-8b2e-cf4ac6e00516	NA	35.317
brain	metastasis	TCGA-DU-7304-02A-12R-A36H-07	Brain Lower Grade Glioma	44b1a976-76e2-4c4d-9348-bb399d986794	NA	13.492
brain	primary_cancer	TCGA-HT-A5R7-01A-11R-A28M-07	Brain Lower Grade Glioma	8022301e-d815-4601-922b-027399c9d279	NA	30.344
brain	primary_cancer	TCGA-06-2565-01A-01R-1849-01	Glioblastoma multiforme	2ee686c6-da57-4371-90a9-db02ab6cb278	NA	54.257
brain	metastasis	TCGA-TQ-A7RK-02B-11R-A40A-07	Brain Lower Grade Glioma	25aa5be1-62ec-4bd7-9509-bafbcd1adddb	NA	50.567
brain	primary_cancer	TCGA-FG-8182-01A-11R-2256-07	Brain Lower Grade Glioma	e47cae41-4eee-4164-a58c-4aeb83fed7fc	NA	64.3
brain	primary_cancer	TCGA-P5-A5ET-01A-11R-A27Q-07	Brain Lower Grade Glioma	669947ca-d955-4bcd-b593-bf86f1edb8df	NA	74.133
brain	primary_cancer	TCGA-28-2514-01A-02R-1850-01	Glioblastoma multiforme	94985059-d992-4f1f-ae67-36cf287f443d	NA	19.19
brain	primary_cancer	TCGA-TM-A7CA-01A-21R-A33Z-07	Brain Lower Grade Glioma	3fa4bf80-8a79-4a49-9b1e-40cf5696ad28	NA	60.163
brain	primary_cancer	TCGA-TM-A84T-01A-11R-A36H-07	Brain Lower Grade Glioma	c1ccfad6-dc2b-49ea-97bd-044b1bf195dd	NA	66.154
brain	primary_cancer	TCGA-DB-A75O-01A-11R-A32Q-07	Brain Lower Grade Glioma	46154213-1bd9-4de6-b396-bb0016d56bbd	NA	67.202
brain	primary_cancer	TCGA-DU-5854-01A-11R-1708-07	Brain Lower Grade Glioma	10fb1701-1d93-4b24-aa8b-2814e80de197	NA	36.923
brain	primary_cancer	TCGA-DU-A5TP-01A-11R-A28M-07	Brain Lower Grade Glioma	9eaedfe9-a6f0-46e3-8961-7a222df9127c	NA	18.925
brain	primary_cancer	TCGA-HT-7690-01A-11R-2256-07	Brain Lower Grade Glioma	a00de36d-7c6d-453a-b791-08c752ccfefc	NA	60.231
brain	primary_cancer	TCGA-26-1442-01A-01R-1850-01	Glioblastoma multiforme	049eb561-95ee-4584-b9eb-0715c80e0a95	NA	52.223
brain	primary_cancer	TCGA-S9-A7IS-01A-11R-A34F-07	Brain Lower Grade Glioma	2550796d-132e-4387-a730-b7fb2e1ee16e	NA	27.821
brain	primary_cancer	TCGA-DU-A7TI-01A-11R-A33Z-07	Brain Lower Grade Glioma	4b078458-3461-4e86-974f-11b677908e29	NA	68.836
brain	primary_cancer	TCGA-QH-A6XC-01A-12R-A32Q-07	Brain Lower Grade Glioma	acf520e1-55ec-41e7-a2a5-1e9eabac0b93	NA	24.845
brain	primary_cancer	TCGA-06-0744-01A-01R-1849-01	Glioblastoma multiforme	d29e5a15-6ad2-41f9-b4e8-5c4b0f3fda9e	NA	27.666
brain	primary_cancer	TCGA-QH-A6X3-01A-21R-A32Q-07	Brain Lower Grade Glioma	f514a04f-e20a-497f-98a0-747474815ecd	NA	58.473
brain	primary_cancer	TCGA-QH-A6CZ-01A-11R-A32Q-07	Brain Lower Grade Glioma	3d2e42a7-d83f-471b-ac4c-19f3d62eb0ee	NA	29.794
brain	primary_cancer	TCGA-FG-A711-01A-21R-A33Z-07	Brain Lower Grade Glioma	9f0c08da-bb32-4888-b560-0f5762594304	NA	59.471
brain	primary_cancer	TCGA-S9-A7R8-01A-11R-A34R-07	Brain Lower Grade Glioma	28107f81-2e82-4bc9-99e4-f1b24444c811	NA	61.836
brain	primary_cancer	TCGA-HT-7602-01A-21R-2090-07	Brain Lower Grade Glioma	71fddbd0-c910-40f0-80fb-09148065220b	NA	74.262
brain	primary_cancer	TCGA-06-0219-01A-01R-1849-01	Glioblastoma multiforme	559a1178-052c-4452-876c-ba2468a3160a	NA	8.853
brain	primary_cancer	TCGA-DU-A7TA-01A-11R-A33Z-07	Brain Lower Grade Glioma	a3966107-19e4-467c-a692-9a154cc09c20	NA	64.838
brain	primary_cancer	TCGA-28-5204-01A-01R-1850-01	Glioblastoma multiforme	6f987110-3dbf-4f06-952a-e1aea4b81b44	NA	60.439
brain	primary_cancer	TCGA-DU-6399-01A-12R-1708-07	Brain Lower Grade Glioma	f1a80ad7-316b-4bf7-a428-3d46f498b571	NA	90.393
brain	primary_cancer	TCGA-TM-A84O-01A-11R-A36H-07	Brain Lower Grade Glioma	4ad229f0-dae4-485e-8f36-a79dd071a812	NA	66.695
brain	primary_cancer	TCGA-DU-6397-01A-11R-1708-07	Brain Lower Grade Glioma	32192c9c-9ab2-4709-b419-9beb7853ca2f	NA	77.733
brain	primary_cancer	TCGA-08-0386-01A-01R-1849-01	Glioblastoma multiforme	49516e85-eebe-491b-90eb-c76e4425f130	NA	71.044
brain	primary_cancer	TCGA-14-0789-01A-01R-1849-01	Glioblastoma multiforme	48a2ae8d-a9c4-4d06-8619-ad49502b3721	NA	22.033
brain	primary_cancer	TCGA-HT-7692-01A-12R-2256-07	Brain Lower Grade Glioma	b497a736-d140-47f4-8429-f53a7c005334	NA	56.019
brain	primary_cancer	TCGA-14-0787-01A-01R-1849-01	Glioblastoma multiforme	a77fc356-53b6-4932-a369-4bb7b89f8ed2	NA	51.152
brain	primary_cancer	TCGA-14-0871-01A-01R-1849-01	Glioblastoma multiforme	4bd8bbae-7370-43c7-89cb-0fe0028553dd	NA	23.07
brain	primary_cancer	TCGA-DH-A669-01A-12R-A31N-07	Brain Lower Grade Glioma	cb9ff749-d103-418f-b0f3-52ef1f5fcb7d	NA	38.501
brain	primary_cancer	TCGA-28-5218-01A-01R-1850-01	Glioblastoma multiforme	9146c99d-fa73-433d-8460-f2587ce674bb	NA	11.253
brain	primary_cancer	TCGA-CS-6670-01A-11R-1896-07	Brain Lower Grade Glioma	a51a4c9e-c160-4a29-8b72-3c1ff60b0107	NA	50.252
brain	primary_cancer	TCGA-DU-A7TJ-01A-11R-A34R-07	Brain Lower Grade Glioma	9b0933e8-1da1-427b-8d3f-ef4742888ebd	NA	73.179
brain	primary_cancer	TCGA-HT-8018-01A-11R-2404-07	Brain Lower Grade Glioma	2398c528-0e80-4c72-a5cc-cd82c7895468	NA	34.061
brain	primary_cancer	TCGA-FG-5963-01A-11R-1708-07	Brain Lower Grade Glioma	b6bdb9e4-c456-4d5b-8aa1-22c8c33b77ef	NA	41.671
brain	primary_cancer	TCGA-28-2509-01A-01R-1850-01	Glioblastoma multiforme	0cbec58e-f95e-4c60-a85d-210dc56bdf3c	NA	19.833
brain	primary_cancer	TCGA-02-0055-01A-01R-1849-01	Glioblastoma multiforme	065048d0-ecbf-4de2-b12a-55e52f8d1279	NA	4.965
brain	primary_cancer	TCGA-FG-A6IZ-01A-11R-A31N-07	Brain Lower Grade Glioma	3730c75e-f1cc-46ca-a26e-92f74858663b	NA	45.02
brain	primary_cancer	TCGA-E1-5303-01A-01R-1470-07	Brain Lower Grade Glioma	0edca07e-a874-4cfc-ae79-1080fee6a5f7	NA	45.352
brain	primary_cancer	TCGA-DU-6393-01A-11R-1708-07	Brain Lower Grade Glioma	1bb006de-b90b-43fe-8f1e-2357faf7c73f	NA	74.402
brain	primary_cancer	TCGA-E1-5302-01A-01R-1470-07	Brain Lower Grade Glioma	468e10c6-3ce9-4334-97d4-55d91799daf9	NA	62.029
brain	primary_cancer	TCGA-27-2523-01A-01R-1850-01	Glioblastoma multiforme	b337121c-9821-4644-820e-b8c477f6c38a	NA	42.668
brain	primary_cancer	TCGA-VW-A7QS-01A-12R-A33Z-07	Brain Lower Grade Glioma	adb5aa16-9fe9-4369-a80e-e6eecda07322	NA	51.374
brain	primary_cancer	TCGA-HT-8108-01A-11R-2404-07	Brain Lower Grade Glioma	4743ae20-4a24-475b-9d1a-3def852738b3	NA	62.163
brain	primary_cancer	TCGA-06-2559-01A-01R-1849-01	Glioblastoma multiforme	e623cbaa-d406-4c82-b9e8-21acfc9e630a	NA	28.778
brain	metastasis	TCGA-FG-5965-02A-11R-A29R-07	Brain Lower Grade Glioma	74361c55-c785-4d24-8687-be8adbd75de7	NA	28.806
brain	primary_cancer	TCGA-DU-A5TR-01A-11R-A28M-07	Brain Lower Grade Glioma	f23834b0-13c3-4dd5-a20b-0f20cd92ec23	NA	34.679
brain	primary_cancer	TCGA-TM-A84C-01A-11R-A36H-07	Brain Lower Grade Glioma	2111b1a5-6018-4647-83dc-96a70dac667b	NA	25.61
brain	primary_cancer	TCGA-15-0742-01A-01R-1850-01	Glioblastoma multiforme	3721666c-f46f-4b43-9f5d-b3cf85af176c	NA	64.908
brain	primary_cancer	TCGA-06-0178-01A-01R-1849-01	Glioblastoma multiforme	271ec214-e83b-4fcb-85cf-f35f3c39f0aa	NA	14.017
brain	primary_cancer	TCGA-12-0821-01A-01R-1849-01	Glioblastoma multiforme	e454530c-3b94-444c-bd1a-682b6048aa94	NA	27.713
brain	primary_cancer	TCGA-FG-A70Y-01A-12R-A34R-07	Brain Lower Grade Glioma	74d15e51-1d60-4e97-ae99-e412e454d6b1	NA	70.601
brain	primary_cancer	TCGA-IK-8125-01A-11R-2256-07	Brain Lower Grade Glioma	65c41ecc-29dc-4deb-bfbc-11ca732065f7	NA	54.311
brain	primary_cancer	TCGA-DU-6410-01A-11R-1896-07	Brain Lower Grade Glioma	015b3ae9-dee4-495a-9c4d-78ee51082715	NA	65.304
brain	primary_cancer	TCGA-12-0618-01A-01R-1849-01	Glioblastoma multiforme	df36c4af-258e-4cfb-9550-d3580d097547	NA	41.829
brain	primary_cancer	TCGA-TQ-A7RQ-01A-11R-A33Z-07	Brain Lower Grade Glioma	02221ced-8f59-4a00-ae01-6096648b34fc	NA	57.134
brain	primary_cancer	TCGA-DU-A76R-01A-11R-A32Q-07	Brain Lower Grade Glioma	22609052-fb11-4d62-bbfa-4837b30f37ac	NA	77.358
brain	primary_cancer	TCGA-HT-8564-01A-11R-2404-07	Brain Lower Grade Glioma	6899de21-8648-45fa-a519-679b0438f848	NA	22.326
brain	primary_cancer	TCGA-P5-A736-01A-11R-A32Q-07	Brain Lower Grade Glioma	322513c4-e082-45aa-82c4-930f0ca2bada	NA	84.69
brain	primary_cancer	TCGA-DB-5278-01A-01R-1470-07	Brain Lower Grade Glioma	3cd458e4-4e4a-4360-b667-5953c1425f75	NA	73.686
brain	primary_cancer	TCGA-HT-A5RA-01A-11R-A28M-07	Brain Lower Grade Glioma	2b4e9c4e-0f22-4251-947f-0e23a1fbbe62	NA	42.609
brain	primary_cancer	TCGA-32-2634-01A-01R-1850-01	Glioblastoma multiforme	ecd3ecba-4d25-4995-91df-e076f0cbe2bc	NA	27.915
brain	primary_cancer	TCGA-HT-A4DV-01A-11R-A26U-07	Brain Lower Grade Glioma	8d03eb0d-b6f2-4b28-aa26-4de13bd37270	NA	47.003
brain	primary_cancer	TCGA-HT-7858-01A-11R-2403-07	Brain Lower Grade Glioma	80d3ddd2-1dbe-4f47-b1f1-b1ea99970332	NA	57.257
brain	primary_cancer	TCGA-06-5411-01A-01R-1849-01	Glioblastoma multiforme	98937e70-6d2c-4057-b5ef-e01d0006486f	NA	16.528
brain	primary_cancer	TCGA-E1-5319-01A-01R-1896-07	Brain Lower Grade Glioma	927d20e2-da09-42ca-a70c-2b203a8297a6	NA	62.376
brain	primary_cancer	TCGA-06-0750-01A-01R-1849-01	Glioblastoma multiforme	47fbba7a-4914-4bcd-9fea-7ebb84fb4b47	NA	27.711
brain	primary_cancer	TCGA-EZ-7264-01A-11R-2027-07	Brain Lower Grade Glioma	c34a63cc-746b-4502-a1ff-d7bece07b679	NA	62.7
brain	primary_cancer	TCGA-WY-A858-01A-11R-A36H-07	Brain Lower Grade Glioma	cd61bf43-fca1-49b2-824e-133484a6e069	NA	24.99
brain	primary_cancer	TCGA-DU-6394-01A-11R-1708-07	Brain Lower Grade Glioma	fb8d125a-badb-4b4a-ab74-916c93ebbf21	NA	55.678
brain	primary_cancer	TCGA-76-4926-01B-01R-1850-01	Glioblastoma multiforme	110100d2-bfb8-42d2-875f-9424a8bd2086	NA	61.062
brain	primary_cancer	TCGA-HW-A5KK-01A-11R-A27Q-07	Brain Lower Grade Glioma	bff2060f-591c-4634-a9cb-06d3538d532a	NA	33.281
brain	primary_cancer	TCGA-HT-A74L-01A-11R-A32Q-07	Brain Lower Grade Glioma	5e6fdaa5-ce70-4f0a-a2d8-d66854cb9875	NA	56.142
brain	metastasis	TCGA-19-0957-02A-11R-2005-01	Glioblastoma multiforme	8401d72d-a286-4541-b566-c6212ef4c89c	NA	26.601
brain	primary_cancer	TCGA-06-5859-01A-01R-1849-01	Glioblastoma multiforme	76ad0a38-a2a2-4533-8baf-5f94c0c59a02	NA	52.818
brain	primary_cancer	TCGA-CS-6666-01A-11R-1896-07	Brain Lower Grade Glioma	a990f055-6b58-49c2-8424-4a3f3f5f91f9	NA	66.505
brain	primary_cancer	TCGA-WY-A85B-01A-11R-A36H-07	Brain Lower Grade Glioma	48ffe5e4-5aec-41fd-8b5f-78466a593eef	NA	53.239
brain	primary_cancer	TCGA-DU-7299-01A-21R-2027-07	Brain Lower Grade Glioma	118ba2f8-3a61-41f3-9b4c-18a34181b1bb	NA	69.935
brain	primary_cancer	TCGA-DH-A7UT-01A-12R-A34F-07	Brain Lower Grade Glioma	4c09b51b-d52a-49f2-b5df-5fc38193bd3c	NA	36.057
brain	primary_cancer	TCGA-QH-A65V-01A-11R-A29R-07	Brain Lower Grade Glioma	dbee8779-dd28-4a2b-a485-9fa8b3a9fc88	NA	49.311
brain	primary_cancer	TCGA-E1-5305-01A-01R-1896-07	Brain Lower Grade Glioma	35db896d-9e7c-47df-933f-4eb547913394	NA	111.023
brain	primary_cancer	TCGA-HT-A615-01A-11R-A29R-07	Brain Lower Grade Glioma	6a2adcf5-fc75-46a4-a029-dd84d1a019c0	NA	84.704
brain	primary_cancer	TCGA-QH-A86X-01A-11R-A36H-07	Brain Lower Grade Glioma	3c8ebeb7-68ef-4d11-80b0-fc5560dd01d6	NA	64.802
brain	primary_cancer	TCGA-HT-7607-01A-11R-2090-07	Brain Lower Grade Glioma	a0187097-fff8-497c-87df-ae5d5cc151c1	NA	50.955
brain	primary_cancer	TCGA-QH-A65R-01A-21R-A31N-07	Brain Lower Grade Glioma	b168cb27-2676-40ed-9743-5046d5b0eb8c	NA	33.609
brain	primary_cancer	TCGA-DU-A6S7-01A-21R-A32Q-07	Brain Lower Grade Glioma	b3450230-a250-4c22-ac3b-639abe51fc7b	NA	64.117
brain	primary_cancer	TCGA-CS-6186-01A-12R-2027-07	Brain Lower Grade Glioma	f09a51df-011a-419e-b90a-7cd2037c5690	NA	189.579
brain	primary_cancer	TCGA-P5-A5F0-01A-11R-A28M-07	Brain Lower Grade Glioma	35d073e9-06bc-4ccd-af39-c9fb4c268d7a	NA	49.899
brain	primary_cancer	TCGA-P5-A72X-01A-11R-A32Q-07	Brain Lower Grade Glioma	c5284e5c-9566-4248-a168-362eb039ffe7	NA	72.173
brain	primary_cancer	TCGA-DU-6395-01A-13R-1708-07	Brain Lower Grade Glioma	c1c9f44f-935f-47b9-80cd-5116d52001c3	NA	91.381
brain	primary_cancer	TCGA-HT-7677-01A-11R-2256-07	Brain Lower Grade Glioma	22dcbc1b-95f2-4343-b1e4-18daacd66e28	NA	99.897
brain	metastasis	TCGA-06-0125-02A-11R-2005-01	Glioblastoma multiforme	2e5a4130-bc62-4986-948b-b741b3fbdc7a	NA	39.117
brain	primary_cancer	TCGA-HW-8320-01A-11R-2404-07	Brain Lower Grade Glioma	8fe3cf69-3d71-4d77-aa05-60e619708e06	NA	91.404
brain	primary_cancer	TCGA-S9-A6TU-01A-12R-A32Q-07	Brain Lower Grade Glioma	deff8fdc-d2f8-422a-b5bb-57a65241cf51	NA	34.74
brain	primary_cancer	TCGA-DB-A75M-01A-11R-A32Q-07	Brain Lower Grade Glioma	6bcd916f-8522-40d7-bd66-bf509789e34d	NA	94.627
brain	primary_cancer	TCGA-TQ-A7RH-01A-12R-A34F-07	Brain Lower Grade Glioma	2797760a-c82d-44d8-bec2-92fe1d6ef271	NA	70.601
brain	primary_cancer	TCGA-HT-7476-01A-11R-2027-07	Brain Lower Grade Glioma	cda7debf-70f9-4ea5-9018-35c560bd5ab0	NA	36.207
brain	primary_cancer	TCGA-HW-A5KM-01A-11R-A27Q-07	Brain Lower Grade Glioma	65913e2c-bc8a-44b3-9f14-a4ca9c49042d	NA	76.835
brain	primary_cancer	TCGA-DU-6542-01A-11R-1896-07	Brain Lower Grade Glioma	da02270f-1191-446e-af1d-eabc4e1c3556	NA	86.045
brain	primary_cancer	TCGA-E1-A7YM-01A-11R-A34F-07	Brain Lower Grade Glioma	a51ba688-a2f0-4ad4-82eb-d549e99d1acb	NA	30.407
brain	primary_cancer	TCGA-06-5858-01A-01R-1849-01	Glioblastoma multiforme	67068dc6-6270-4e7b-a857-3008dadc2d59	NA	39.175
brain	primary_cancer	TCGA-DB-5281-01A-01R-1470-07	Brain Lower Grade Glioma	59da9ec2-3d50-4c01-94ce-6da99d100adb	NA	62.119
brain	primary_cancer	TCGA-TQ-A7RK-01A-11R-A33Z-07	Brain Lower Grade Glioma	9730d6b2-f458-4475-a66c-e99aa49e4161	NA	59.446
brain	primary_cancer	TCGA-TQ-A7RJ-01A-11R-A33Z-07	Brain Lower Grade Glioma	2ad4f620-2c9a-4bc0-a24d-fddfee88ba32	NA	62.161
brain	primary_cancer	TCGA-S9-A7QY-01A-11R-A34F-07	Brain Lower Grade Glioma	4df02ab4-fe42-4f21-9678-858ecd99763c	NA	52.996
brain	primary_cancer	TCGA-06-2564-01A-01R-1849-01	Glioblastoma multiforme	6245a56e-eec6-4e7b-b9ef-bf0d1a3dcf36	NA	70.975
brain	primary_cancer	TCGA-DU-7290-01A-11R-2027-07	Brain Lower Grade Glioma	fbf30d45-d36c-49f8-8f5b-7ebcd226f777	NA	38.731
brain	metastasis	TCGA-TQ-A7RV-02A-11R-A36H-07	Brain Lower Grade Glioma	5f1ec365-a309-4042-abc8-b8937497804f	NA	63.89
brain	primary_cancer	TCGA-19-2624-01A-01R-1850-01	Glioblastoma multiforme	d5a281fd-c004-477f-af62-c55fe20f1dee	NA	25.157
brain	primary_cancer	TCGA-HT-7485-01A-11R-2027-07	Brain Lower Grade Glioma	33ceeccf-d800-4e8b-928a-35765299cbaf	NA	139.683
brain	primary_cancer	TCGA-P5-A72U-01A-31R-A32Q-07	Brain Lower Grade Glioma	0c53d4ad-c5b9-4bdc-8154-99cf0b715dd5	NA	38.799
brain	primary_cancer	TCGA-FG-8185-01A-11R-2256-07	Brain Lower Grade Glioma	fa83a73a-1157-42a7-9ed6-7eb73f71724c	NA	86.013
brain	primary_cancer	TCGA-S9-A6TX-01A-21R-A32Q-07	Brain Lower Grade Glioma	0eba2b04-9c32-4432-999a-ba53fe1137ea	NA	40.951
brain	primary_cancer	TCGA-DH-5141-01A-01R-1470-07	Brain Lower Grade Glioma	9e952754-f768-47fd-9580-d9770e9eb45e	NA	57.612
brain	primary_cancer	TCGA-06-0156-01A-02R-1849-01	Glioblastoma multiforme	88958da0-8140-466c-8183-bf4995529b16	NA	19.649
brain	primary_cancer	TCGA-E1-A7YY-01A-11R-A34R-07	Brain Lower Grade Glioma	701fe7aa-5ad5-489d-be6f-54a39afe9e0e	NA	27.25
brain	primary_cancer	TCGA-14-1034-01A-01R-1849-01	Glioblastoma multiforme	28239a0e-9990-49ef-a159-ba63fb078c77	NA	63.794
brain	primary_cancer	TCGA-DU-6401-01A-11R-1708-07	Brain Lower Grade Glioma	2692f7b0-3203-455f-b9b8-23b18eff2de1	NA	79.487
brain	primary_cancer	TCGA-FG-A60J-01A-11R-A28M-07	Brain Lower Grade Glioma	d1c8d59f-1ab1-4450-8d3f-b7bc6e05cd7f	NA	56
brain	primary_cancer	TCGA-CS-4943-01A-01R-1470-07	Brain Lower Grade Glioma	910af7ad-94b5-478e-a2ac-e9f524ef020b	NA	64.544
brain	primary_cancer	TCGA-HT-A61B-01A-11R-A29R-07	Brain Lower Grade Glioma	6740d6ab-1321-4806-961a-116ce5be8d29	NA	39.92
brain	primary_cancer	TCGA-S9-A6WM-01A-12R-A33Z-07	Brain Lower Grade Glioma	fcbffc2c-702c-4c32-95ae-beac08a46f2b	NA	33.05
brain	primary_cancer	TCGA-27-1835-01A-01R-1850-01	Glioblastoma multiforme	5cb5c8ef-740d-4f9d-b081-107a3e4390f6	NA	30.385
brain	primary_cancer	TCGA-HT-7609-01A-11R-2090-07	Brain Lower Grade Glioma	b520d7b8-846f-4ba1-93eb-4891a0d99e72	NA	51.561
brain	primary_cancer	TCGA-WY-A85E-01A-11R-A36H-07	Brain Lower Grade Glioma	478c54a0-9aff-4f34-adfd-477eaf62b896	NA	47.552
brain	primary_cancer	TCGA-02-2486-01A-01R-1849-01	Glioblastoma multiforme	92972663-4231-4e24-96d1-23857a445e03	NA	18.004
brain	primary_cancer	TCGA-FG-A4MT-01A-11R-A26U-07	Brain Lower Grade Glioma	f7f89edd-0409-43c7-ab5d-3d35337de34f	NA	65.604
brain	primary_cancer	TCGA-CS-4942-01A-01R-1470-07	Brain Lower Grade Glioma	ff2d7d80-5256-4f05-bcd8-aa9d2816676d	NA	74.966
brain	primary_cancer	TCGA-12-5295-01A-01R-1849-01	Glioblastoma multiforme	9f591278-eec9-422f-9b78-77f65fa84f18	NA	9.935
brain	primary_cancer	TCGA-S9-A7R7-01A-11R-A34R-07	Brain Lower Grade Glioma	2f398759-636a-4d58-9fbc-deb15e5beff6	NA	43.32
brain	primary_cancer	TCGA-DB-A64Q-01A-11R-A29R-07	Brain Lower Grade Glioma	f2249fe9-e838-4895-9e46-98fa8f30655e	NA	56.136
brain	primary_cancer	TCGA-FG-8191-01A-11R-2256-07	Brain Lower Grade Glioma	355c3ccb-f1c3-4e73-a41a-7a3ece9a5f6b	NA	36.847
brain	primary_cancer	TCGA-DU-5847-01A-11R-1708-07	Brain Lower Grade Glioma	5a559e30-17cb-4467-b54c-18dcfdb93fde	NA	57.459
brain	primary_cancer	TCGA-32-1982-01A-01R-1850-01	Glioblastoma multiforme	3a5d8c95-260e-471a-bdf8-2fa489a069d8	NA	11.964
brain	metastasis	TCGA-FG-5963-02A-12R-A29R-07	Brain Lower Grade Glioma	d231f3e4-48e2-4e94-a995-dcbfc9f0d471	NA	60.762
brain	primary_cancer	TCGA-E1-5322-01A-01R-1470-07	Brain Lower Grade Glioma	d7d5e04b-d563-418b-b312-0fe69b4bec29	NA	85.23
brain	primary_cancer	TCGA-S9-A7J1-01A-21R-A34R-07	Brain Lower Grade Glioma	ba3ea21e-4806-4eaa-99df-d7544248cb37	NA	73.204
brain	primary_cancer	TCGA-QH-A6X4-01A-51R-A32Q-07	Brain Lower Grade Glioma	0ba1f5ce-704d-4a40-854a-fcde2b4dee86	NA	57.505
brain	primary_cancer	TCGA-16-0846-01A-01R-1850-01	Glioblastoma multiforme	8dd4d862-180f-479b-8d87-0eaae4fc9236	NA	37.267
brain	primary_cancer	TCGA-S9-A89Z-01A-11R-A36H-07	Brain Lower Grade Glioma	58ecffdf-6f33-4a8e-b983-f6f4261cde2b	NA	16.146
brain	primary_cancer	TCGA-S9-A7QW-01A-11R-A34F-07	Brain Lower Grade Glioma	f2dba2e9-157b-494b-9650-e17d0ccc421b	NA	79.159
brain	primary_cancer	TCGA-RY-A83X-01A-11R-A36H-07	Brain Lower Grade Glioma	c44e9cfc-d595-4098-b55b-8275d7284f05	NA	53.376
brain	primary_cancer	TCGA-76-4929-01A-01R-1850-01	Glioblastoma multiforme	faadb03e-20bc-4308-a86b-2bdb6aad8a23	NA	66.062
brain	primary_cancer	TCGA-06-0190-01A-01R-1849-01	Glioblastoma multiforme	612ef912-5a28-4c11-8703-3376f51afef5	NA	22.822
brain	primary_cancer	TCGA-HT-8111-01A-11R-2404-07	Brain Lower Grade Glioma	f68cffac-4db9-470c-b726-01fb876a381a	NA	56.77
brain	primary_cancer	TCGA-HT-A61C-01A-11R-A29R-07	Brain Lower Grade Glioma	8139b1af-5d6d-4fd4-b834-08cc4a18d0a9	NA	18.731
brain	primary_cancer	TCGA-28-5207-01A-01R-1850-01	Glioblastoma multiforme	6251a0df-d7ff-4a1b-9aa6-7d12ea04bd2c	NA	56.899
brain	primary_cancer	TCGA-DU-6400-01A-12R-1708-07	Brain Lower Grade Glioma	3e095f21-2bc5-4ee8-bf9f-0035164d2113	NA	60.294
brain	primary_cancer	TCGA-DU-A5TY-01A-11R-A28M-07	Brain Lower Grade Glioma	c38bbaa0-6752-4301-9e44-c1cd13c03625	NA	42.146
brain	primary_cancer	TCGA-S9-A6TV-01A-12R-A34R-07	Brain Lower Grade Glioma	d5c2aa43-35e2-41b9-9b55-c0a6618dfb20	NA	36.86
brain	primary_cancer	TCGA-FG-7637-01A-11R-2090-07	Brain Lower Grade Glioma	8204b99d-4224-4bb9-b297-413956b203ee	NA	80.653
brain	metastasis	TCGA-19-4065-02A-11R-2005-01	Glioblastoma multiforme	6287ca85-ad7b-4656-9c6e-8c3c44833462	NA	12.123
brain	primary_cancer	TCGA-HT-8107-01A-13R-2404-07	Brain Lower Grade Glioma	3129849c-97e6-4e22-b7d1-dd3ab7fb81d8	NA	23.968
brain	primary_cancer	TCGA-VM-A8C9-01A-11R-A36H-07	Brain Lower Grade Glioma	ea214bab-dd3f-4594-9c93-e60fa586b3a4	NA	52.3
brain	primary_cancer	TCGA-32-2632-01A-01R-1850-01	Glioblastoma multiforme	2b467bcc-e33f-4209-92c0-dcff843027ea	NA	35.632
brain	primary_cancer	TCGA-DU-8166-01A-11R-2256-07	Brain Lower Grade Glioma	12953bc4-8704-4fcc-9efa-3801a1a6c4b7	NA	76.588
brain	primary_cancer	TCGA-14-0790-01B-01R-1849-01	Glioblastoma multiforme	68de1b36-afde-4fb9-bd5a-38037cd7df11	NA	52.724
brain	primary_cancer	TCGA-WY-A85A-01A-21R-A36H-07	Brain Lower Grade Glioma	055357fc-1a16-4ff4-a826-2e87a9e99190	NA	80.665
brain	primary_cancer	TCGA-28-2510-01A-01R-1850-01	Glioblastoma multiforme	8880d24b-a72e-4472-8d14-19e58e0a61ae	NA	23.763
brain	primary_cancer	TCGA-CS-4941-01A-01R-1470-07	Brain Lower Grade Glioma	f48c7bd0-048b-411e-a99c-4a6af9df51e4	NA	40.255
brain	primary_cancer	TCGA-06-0210-01A-01R-1849-01	Glioblastoma multiforme	a0dfc338-c576-4a9c-8db3-3bbbcd5dc960	NA	32.932
brain	primary_cancer	TCGA-QH-A6CS-01A-11R-A31N-07	Brain Lower Grade Glioma	a3ea6fd3-7570-4cf5-93c9-33dccdc3d026	NA	44.65
brain	primary_cancer	TCGA-DU-5872-01A-11R-1708-07	Brain Lower Grade Glioma	bf5bd9e6-0623-4aac-9336-4ff9dd538c7c	NA	51.022
brain	primary_cancer	TCGA-TM-A84G-01A-11R-A36H-07	Brain Lower Grade Glioma	bdbde24d-9270-4e7b-84f3-1ba0b7d54e55	NA	67.923
brain	primary_cancer	TCGA-QH-A65S-01A-11R-A29R-07	Brain Lower Grade Glioma	7ee7ec4c-236b-4d28-94ee-a9e284f03afd	NA	40.038
brain	primary_cancer	TCGA-FG-A4MY-01A-11R-A26U-07	Brain Lower Grade Glioma	c58aae77-ec2e-4988-b6c6-4cde7f4b60e1	NA	39.847
brain	primary_cancer	TCGA-WY-A85D-01A-11R-A36H-07	Brain Lower Grade Glioma	0b4aa4f0-32cb-4974-892c-6dba516cc85b	NA	71.821
brain	metastasis	TCGA-DU-6397-02A-12R-A36H-07	Brain Lower Grade Glioma	5154656a-156d-4118-8415-75b9253ad3f9	NA	37.063
brain	primary_cancer	TCGA-S9-A6WE-01A-12R-A33Z-07	Brain Lower Grade Glioma	617f1516-010f-4eaf-95cf-f27de12eb2c4	NA	66.008
brain	primary_cancer	TCGA-DB-A64O-01A-11R-A29R-07	Brain Lower Grade Glioma	3eca387f-17e0-438d-8bae-f31f0ce7396d	NA	69.161
brain	primary_cancer	TCGA-19-4065-01A-01R-2005-01	Glioblastoma multiforme	3053a2c5-4426-4d56-85b0-50567f1e81c9	NA	14.792
brain	primary_cancer	TCGA-DU-8165-01A-11R-2256-07	Brain Lower Grade Glioma	a6f7a064-b3af-41aa-9e80-fc2f728b0d83	NA	32.845
brain	primary_cancer	TCGA-DH-5142-01A-01R-1470-07	Brain Lower Grade Glioma	ce2a4f0a-e77f-446b-9412-432daaf5d351	NA	50.847
brain	primary_cancer	TCGA-HT-7880-01A-11R-2403-07	Brain Lower Grade Glioma	aed81cc7-515a-45f8-9017-bf6df58f2235	NA	35.761
brain	primary_cancer	TCGA-E1-A7YV-01A-11R-A34R-07	Brain Lower Grade Glioma	234d1db1-82a5-4b7d-b5f3-044a440b4233	NA	28.993
brain	primary_cancer	TCGA-TM-A84I-01A-11R-A36H-07	Brain Lower Grade Glioma	e7549428-1144-41c1-98cd-d077fc258567	NA	34.163
brain	primary_cancer	TCGA-E1-A7YJ-01A-11R-A34F-07	Brain Lower Grade Glioma	f786ecc3-b6e1-4fb2-9658-25d2831982d9	NA	35.473
brain	primary_cancer	TCGA-DU-7006-01A-11R-2027-07	Brain Lower Grade Glioma	2c1bdff1-365e-42f2-8fc6-772e9e5fa274	NA	71.036
brain	primary_cancer	TCGA-26-5134-01A-01R-1850-01	Glioblastoma multiforme	49280503-5136-4c10-8e42-061abbb6fa05	NA	3.277
brain	primary_cancer	TCGA-DU-7298-01A-11R-2027-07	Brain Lower Grade Glioma	796ff6a5-e27c-4e86-8ac3-7aa29d3b6bd8	NA	62.489
brain	primary_cancer	TCGA-DU-7014-01A-11R-2027-07	Brain Lower Grade Glioma	e1355ed5-ae8c-47ba-9b60-a72038142b89	NA	28.404
brain	primary_cancer	TCGA-HT-7691-01A-11R-2256-07	Brain Lower Grade Glioma	162b8ed0-de59-46cd-8e16-52b55e0f5467	NA	59.09
brain	primary_cancer	TCGA-06-0132-01A-02R-1849-01	Glioblastoma multiforme	66f6da01-b85b-4e29-8059-0bb6a32d709f	NA	18.212
brain	primary_cancer	TCGA-14-0817-01A-01R-1849-01	Glioblastoma multiforme	60003a9d-4fed-4131-839d-13d72f6d9c28	NA	8.607
brain	primary_cancer	TCGA-HT-7610-01A-21R-2090-07	Brain Lower Grade Glioma	a48f9376-bff1-4939-8d52-349e471b650f	NA	58.087
brain	primary_cancer	TCGA-DU-6404-01A-11R-1708-07	Brain Lower Grade Glioma	50ec944a-3bb5-41b1-965e-e5cf7f5bd24b	NA	133.717
brain	primary_cancer	TCGA-DU-5853-01A-11R-1896-07	Brain Lower Grade Glioma	3fd8286a-b9a6-42b8-9ecd-7ed96744251a	NA	79.293
brain	primary_cancer	TCGA-S9-A6U1-01A-21R-A33Z-07	Brain Lower Grade Glioma	25e9f832-aae2-463f-ad18-9d5ac9fb506c	NA	90.173
brain	primary_cancer	TCGA-DB-A4XF-01A-11R-A27Q-07	Brain Lower Grade Glioma	276b4801-2b93-4224-99a2-d3fb73fca361	NA	56.185
brain	primary_cancer	TCGA-DH-5140-01A-01R-1470-07	Brain Lower Grade Glioma	be3eca27-9d48-4e21-9146-fb47c7ac4233	NA	41.854
brain	primary_cancer	TCGA-DB-5280-01A-01R-1470-07	Brain Lower Grade Glioma	b946f1d5-835d-4d78-a74d-2d19fa78eb0a	NA	178.504
brain	primary_cancer	TCGA-06-5416-01A-01R-1849-01	Glioblastoma multiforme	69336246-eb91-424b-9cd2-8cbdcf7adfe7	NA	14.523
brain	primary_cancer	TCGA-06-0157-01A-01R-1849-01	Glioblastoma multiforme	e50235f8-f8cf-44c8-9d5e-ca5bbbb6291a	NA	51.449
brain	primary_cancer	TCGA-DB-A4XB-01A-11R-A26U-07	Brain Lower Grade Glioma	e10cc5f8-4d2e-4de5-a31c-5df6889e4ba8	NA	89.803
brain	primary_cancer	TCGA-S9-A6U2-01A-21R-A33Z-07	Brain Lower Grade Glioma	108d720f-7f3f-481e-ad11-5a30f4c4f9a4	NA	83.766
brain	primary_cancer	TCGA-28-5220-01A-01R-1850-01	Glioblastoma multiforme	2d1481b0-3bdd-4b9e-b1e1-813d0c624c25	NA	26.105
brain	primary_cancer	TCGA-DU-5874-01A-11R-1708-07	Brain Lower Grade Glioma	40b5eda3-8b01-4cd7-acb5-0ea4e9ff4312	NA	51.574
brain	primary_cancer	TCGA-DU-7301-01A-11R-2090-07	Brain Lower Grade Glioma	46359f28-97f8-42ee-9b7b-6652ac0f469a	NA	78.118
brain	primary_cancer	TCGA-S9-A6U8-01A-21R-A33Z-07	Brain Lower Grade Glioma	6ff9c39a-7992-411e-a14a-631589199c3a	NA	102.133
brain	primary_cancer	TCGA-12-3652-01A-01R-1849-01	Glioblastoma multiforme	125927b5-24fd-4910-8b21-6fe37adb8a7c	NA	13.197
brain	primary_cancer	TCGA-HT-7475-01A-11R-2027-07	Brain Lower Grade Glioma	c57ba10b-0485-4566-be4b-def8197360a4	NA	50.388
brain	primary_cancer	TCGA-06-0187-01A-01R-1849-01	Glioblastoma multiforme	4e8e7e01-95a7-4724-bbc5-91436d80d0f7	NA	48.45
brain	primary_cancer	TCGA-FG-7641-01B-11R-2256-07	Brain Lower Grade Glioma	ce5f6628-79c7-414b-8ad1-5714016c44ab	NA	55.159
brain	primary_cancer	TCGA-41-2572-01A-01R-1850-01	Glioblastoma multiforme	f46e05f2-56b9-4a31-b0ec-882414a7aaf6	NA	32.891
brain	primary_cancer	TCGA-32-4213-01A-01R-1850-01	Glioblastoma multiforme	c6d836ec-710d-4559-ba66-2715f6a55d4c	NA	12.635
brain	primary_cancer	TCGA-P5-A5F2-01A-11R-A28M-07	Brain Lower Grade Glioma	52284719-7a37-4969-905b-dde2068409c2	NA	68.265
brain	primary_cancer	TCGA-R8-A6YH-01A-21R-A32Q-07	Brain Lower Grade Glioma	500000a8-420b-43e1-9ed1-e0d66fe2aece	NA	70.416
brain	primary_cancer	TCGA-R8-A6ML-01A-11R-A32Q-07	Brain Lower Grade Glioma	58e03221-6257-4bf1-984f-ee7a92418c13	NA	66.33
brain	primary_cancer	TCGA-VV-A829-01A-21R-A36H-07	Brain Lower Grade Glioma	13d82ac1-eecc-41bb-af05-4fd4f614f260	NA	32.175
brain	primary_cancer	TCGA-28-5213-01A-01R-1850-01	Glioblastoma multiforme	ff4d089b-8f65-46f1-b3bc-dab1271725fb	NA	22.116
brain	primary_cancer	TCGA-HT-7467-01A-11R-2027-07	Brain Lower Grade Glioma	e752561a-f5e2-4390-93f1-a487447b6557	NA	35.799
brain	primary_cancer	TCGA-DU-7010-01A-11R-2027-07	Brain Lower Grade Glioma	72721695-e7f3-48c8-82a1-84156e174cad	NA	45.593
brain	primary_cancer	TCGA-28-5208-01A-01R-1850-01	Glioblastoma multiforme	63f989ff-890b-4db8-973f-ab675912635f	NA	38.34
brain	primary_cancer	TCGA-HW-A5KL-01A-11R-A27Q-07	Brain Lower Grade Glioma	f9caf12e-40d1-4eec-ae39-2067f78c86c6	NA	53.992
brain	primary_cancer	TCGA-DB-5275-01A-01R-1470-07	Brain Lower Grade Glioma	eecd47a0-bde3-438b-b87a-f4e440228579	NA	77.517
brain	primary_cancer	TCGA-HT-A4DS-01A-11R-A26U-07	Brain Lower Grade Glioma	8aa3351e-ac40-409f-a2b9-4febbf3e0c47	NA	16.688
brain	primary_cancer	TCGA-TQ-A7RI-01A-11R-A33Z-07	Brain Lower Grade Glioma	d071f7d9-cc1c-4b7d-8555-b8aab5730bb6	NA	51.586
brain	primary_cancer	TCGA-QH-A6X9-01A-12R-A32Q-07	Brain Lower Grade Glioma	5089e59f-7c52-4c4d-a1f3-a4cbd84877ae	NA	51.161
brain	primary_cancer	TCGA-HT-A616-01A-11R-A29R-07	Brain Lower Grade Glioma	80f78f2f-4e63-4561-905e-a81528b79cab	NA	49.931
brain	primary_cancer	TCGA-76-4931-01A-01R-1850-01	Glioblastoma multiforme	ca803595-2792-4d7d-81f6-cce8d96d0119	NA	73.771
brain	primary_cancer	TCGA-P5-A5F1-01A-11R-A28M-07	Brain Lower Grade Glioma	a9db06e4-4069-4533-b85e-9e2fbbaaec7d	NA	114.04
brain	primary_cancer	TCGA-06-0141-01A-01R-1849-01	Glioblastoma multiforme	689fb14c-d3c5-414f-8c7a-8aa73ebbfc37	NA	14.832
brain	primary_cancer	TCGA-DH-A7UR-01A-11R-A33Z-07	Brain Lower Grade Glioma	b9eab491-6fa4-4eee-a2f6-ef923935845e	NA	32.908
brain	primary_cancer	TCGA-TM-A84R-01A-21R-A36H-07	Brain Lower Grade Glioma	67eda5bc-a945-480a-8d69-c517cb265f5d	NA	34.748
brain	primary_cancer	TCGA-HT-7879-01A-11R-2403-07	Brain Lower Grade Glioma	b74282a3-9f58-4342-8ae5-2fc1cbb4933c	NA	81.278
brain	primary_cancer	TCGA-DB-A75K-01A-11R-A32Q-07	Brain Lower Grade Glioma	a956aa35-fb64-4fce-bece-044bd71692f5	NA	41.576
brain	primary_cancer	TCGA-QH-A6CU-01A-11R-A31N-07	Brain Lower Grade Glioma	43d6f3d2-2bd6-41e1-9d85-735f5f60e25a	NA	65.947
brain	primary_cancer	TCGA-DU-5852-01A-11R-1708-07	Brain Lower Grade Glioma	dad44966-2a17-4813-abf8-16b476984948	NA	27.1
brain	primary_cancer	TCGA-41-5651-01A-01R-1850-01	Glioblastoma multiforme	4aa70762-1a0e-4b38-be77-a89db0955193	NA	29.683
brain	primary_cancer	TCGA-RY-A83Z-01A-11R-A36H-07	Brain Lower Grade Glioma	f5dd58db-4834-4d0e-aeb6-15d6b8f05826	NA	62.862
brain	primary_cancer	TCGA-FG-A70Z-01A-12R-A33Z-07	Brain Lower Grade Glioma	bf983be3-abeb-44d7-a9e5-12186d6d303d	NA	31.906
brain	primary_cancer	TCGA-HT-7687-01A-11R-2256-07	Brain Lower Grade Glioma	fc4a13f0-831a-4e31-a2a1-29486bf9d006	NA	51.499
brain	primary_cancer	TCGA-W9-A837-01A-11R-A36H-07	Brain Lower Grade Glioma	d48e6a92-05f9-4400-828c-e3fdb17c99ac	NA	48.426
brain	primary_cancer	TCGA-DU-7019-01A-11R-2027-07	Brain Lower Grade Glioma	dbd2c9f3-4a21-4f9f-8346-62551d1c609b	NA	90.29
brain	primary_cancer	TCGA-TQ-A7RV-01A-21R-A34F-07	Brain Lower Grade Glioma	44347235-2162-41f1-892e-1cf85f157ece	NA	76.035
brain	primary_cancer	TCGA-DH-5143-01A-01R-1470-07	Brain Lower Grade Glioma	ae0546ae-4f2e-4824-94d6-91fefd7fddbb	NA	91.653
brain	primary_cancer	TCGA-27-2521-01A-01R-1850-01	Glioblastoma multiforme	9afb2af1-ea34-41ad-8a5d-5f24df2aba0b	NA	41.942
brain	primary_cancer	TCGA-HT-A61A-01A-11R-A29R-07	Brain Lower Grade Glioma	c68ca414-0567-4349-8ad4-55df8cbcc35d	NA	26.304
brain	primary_cancer	TCGA-HT-8105-01A-11R-2404-07	Brain Lower Grade Glioma	75016f4c-257e-4e24-9e91-5ab4b8c53e5a	NA	49.387
brain	primary_cancer	TCGA-HT-7483-01A-11R-2027-07	Brain Lower Grade Glioma	9dae5e73-aec6-461b-94e7-785065eea36e	NA	70.853
brain	primary_cancer	TCGA-06-0644-01A-02R-1849-01	Glioblastoma multiforme	d52e7499-1325-4506-ae20-bd683d37318e	NA	7.566
brain	primary_cancer	TCGA-HT-7860-01A-11R-2403-07	Brain Lower Grade Glioma	5ee6524b-9289-45a8-949e-ba0ce44913fe	NA	82.451
brain	primary_cancer	TCGA-CS-5397-01A-01R-1896-07	Brain Lower Grade Glioma	c1d8d162-5154-4d6a-8166-6e4e8bf5cc8d	NA	74.185
brain	metastasis	TCGA-06-0211-02A-02R-2005-01	Glioblastoma multiforme	152afe8c-f67c-4d7c-93ac-e1b7edd56c54	NA	24.646
brain	metastasis	TCGA-06-0190-02A-01R-2005-01	Glioblastoma multiforme	0ffc2552-883a-4e8f-9f76-4f37dfce3278	NA	10.714
brain	primary_cancer	TCGA-DU-7012-01A-11R-2027-07	Brain Lower Grade Glioma	61051f5f-b74b-4b31-ae20-b91491f571d6	NA	58.323
brain	primary_cancer	TCGA-IK-7675-01A-11R-2090-07	Brain Lower Grade Glioma	97d4524f-bd35-4dfe-9ef5-e1298713aaa4	NA	48.799
brain	primary_cancer	TCGA-DU-A7TG-01A-21R-A34R-07	Brain Lower Grade Glioma	32d4e5fa-74d7-40c7-96ae-a6fb0707524d	NA	33.026
brain	primary_cancer	TCGA-S9-A7QZ-01A-12R-A34R-07	Brain Lower Grade Glioma	738ae7fd-6fa8-4aa4-b01f-34a519dc279f	NA	40.152
brain	primary_cancer	TCGA-QH-A65X-01A-11R-A32Q-07	Brain Lower Grade Glioma	551f30d8-5382-4705-b81f-9d29ea31178d	NA	36.737
brain	primary_cancer	TCGA-DB-5277-01A-01R-1470-07	Brain Lower Grade Glioma	6a2acb28-0ccb-4f10-aba9-4d8b2aa29b1d	NA	54.43
brain	primary_cancer	TCGA-TQ-A7RU-01A-21R-A34F-07	Brain Lower Grade Glioma	c1132808-3c5c-47d8-90ad-b47f8d2d48c7	NA	73.832
brain	primary_cancer	TCGA-HT-8019-01A-21R-2404-07	Brain Lower Grade Glioma	e73d9fe9-8abb-454e-9b62-90bde2e5c5a9	NA	21.931
brain	primary_cancer	TCGA-FG-6688-01A-11R-1896-07	Brain Lower Grade Glioma	3cf6d88f-d583-448e-a3c1-fd8131738114	NA	46.221
brain	primary_cancer	TCGA-E1-5304-01A-01R-1470-07	Brain Lower Grade Glioma	b6e08ea4-8a3b-4e8e-9a3a-387e6fc6a94a	NA	45.5
brain	primary_cancer	TCGA-S9-A6WD-01A-12R-A33Z-07	Brain Lower Grade Glioma	450ee18e-9d9b-4873-a882-8b8f123d104c	NA	51.676
brain	primary_cancer	TCGA-DU-8167-01A-11R-2256-07	Brain Lower Grade Glioma	62ddc24c-ffff-4459-95e7-bc2cb08769c9	NA	38.078
brain	primary_cancer	TCGA-S9-A6WG-01A-11R-A33Z-07	Brain Lower Grade Glioma	93b27804-df60-4755-928c-88a156ae008c	NA	55.373
brain	primary_cancer	TCGA-41-3915-01A-01R-1850-01	Glioblastoma multiforme	da360144-ffaf-4f38-bd87-96319fa8d2d4	NA	17.769
brain	primary_cancer	TCGA-CS-4938-01B-11R-1896-07	Brain Lower Grade Glioma	0270b7ae-ef7f-4dd7-b019-3e10afa191ff	NA	133.535
brain	primary_cancer	TCGA-P5-A72W-01A-11R-A32Q-07	Brain Lower Grade Glioma	e60804b1-edc8-40e6-b9a1-9a02682f30d6	NA	64.033
brain	primary_cancer	TCGA-TM-A7C3-01A-11R-A32Q-07	Brain Lower Grade Glioma	5f56116d-79cb-4213-ae59-1b2922d79d17	NA	23.761
brain	primary_cancer	TCGA-28-1747-01C-01R-1850-01	Glioblastoma multiforme	06fcbf45-4b5a-4c5a-976e-9b7bf57479dd	NA	51.071
brain	primary_cancer	TCGA-06-5415-01A-01R-1849-01	Glioblastoma multiforme	b147bdcd-f5b6-41be-bca4-3ef7efcb9ec6	NA	55.919
brain	primary_cancer	TCGA-DB-A64S-01A-11R-A29R-07	Brain Lower Grade Glioma	7ac5d653-615d-4ace-a94a-2c1e09b598f4	NA	78.094
brain	primary_cancer	TCGA-DB-5276-01A-01R-1470-07	Brain Lower Grade Glioma	e93a5c0b-9c66-46d2-a8d6-ae969b28a501	NA	49.428
brain	primary_cancer	TCGA-HT-A74O-01A-11R-A32Q-07	Brain Lower Grade Glioma	6563f101-9cbe-4126-a5dd-fa33c694c257	NA	34.012
brain	metastasis	TCGA-19-1389-02A-21R-2005-01	Glioblastoma multiforme	d722657b-e5b6-4476-94e9-1135ce8aecad	NA	10.788
brain	primary_cancer	TCGA-DU-8158-01A-11R-2256-07	Brain Lower Grade Glioma	ba2365d8-1217-4630-8181-b46bfeed3207	NA	39.453
brain	primary_cancer	TCGA-DU-5855-01A-11R-1708-07	Brain Lower Grade Glioma	9f678cb6-26c7-4c76-831c-e541319648d1	NA	59.356
brain	primary_cancer	TCGA-CS-5393-01A-01R-1470-07	Brain Lower Grade Glioma	05e8c2a3-20fa-4324-b147-8a94948bda68	NA	46.752
brain	primary_cancer	TCGA-06-0158-01A-01R-1849-01	Glioblastoma multiforme	4df60632-cb31-4c0f-8929-d18129668469	NA	41.723
brain	primary_cancer	TCGA-12-1597-01B-01R-1849-01	Glioblastoma multiforme	6f54bcd2-99e9-4f9b-a9b8-6963b922f783	NA	15.569
brain	primary_cancer	TCGA-HT-7857-01A-11R-2403-07	Brain Lower Grade Glioma	7acf607e-4078-49ff-b3f3-8dcd8eee5db5	NA	32.074
brain	primary_cancer	TCGA-S9-A6U5-01A-12R-A33Z-07	Brain Lower Grade Glioma	bf011a58-857d-4191-ab61-56e2a0b9e181	NA	83.264
brain	primary_cancer	TCGA-S9-A6TS-01A-12R-A33Z-07	Brain Lower Grade Glioma	735919a3-a98f-41d9-84cf-0bc3983b9f3b	NA	64.651
brain	primary_cancer	TCGA-HT-7481-01A-11R-2027-07	Brain Lower Grade Glioma	82a92ead-9cb1-473e-9a21-a6be1ddfbaba	NA	37.384
brain	primary_cancer	TCGA-E1-A7Z2-01A-21R-A34R-07	Brain Lower Grade Glioma	4976d0a2-11d3-4132-96c9-b418ffe0e5e7	NA	33.51
brain	primary_cancer	TCGA-HT-7479-01A-11R-2027-07	Brain Lower Grade Glioma	52c20e74-8d7a-4e11-8981-8d2d32a33a32	NA	63.575
brain	metastasis	TCGA-DU-5872-02A-21R-A36H-07	Brain Lower Grade Glioma	0d0edd5c-226b-4dae-a881-24dba9d3caab	NA	30.218
brain	primary_cancer	TCGA-P5-A5EU-01A-11R-A27Q-07	Brain Lower Grade Glioma	af4c730b-9886-4cf1-b859-735c424bc06a	NA	46.897
brain	metastasis	TCGA-06-0221-02A-11R-2005-01	Glioblastoma multiforme	10c78528-13e4-4ce1-b171-939c9e4492d8	NA	48.693
brain	primary_cancer	TCGA-06-0745-01A-01R-1849-01	Glioblastoma multiforme	616011aa-5aad-4078-85a6-e61f98d83363	NA	17.264
brain	primary_cancer	TCGA-12-3653-01A-01R-1849-01	Glioblastoma multiforme	82d0310c-7bd8-422e-97a7-7e73be8d8a30	NA	34.081
brain	primary_cancer	TCGA-DB-A64U-01A-11R-A29R-07	Brain Lower Grade Glioma	cc3a055a-6e86-43d1-9266-b16c172b27d6	NA	65.077
brain	primary_cancer	TCGA-27-2528-01A-01R-1850-01	Glioblastoma multiforme	2de8f5dd-decd-47f4-856a-bda678ee6ab8	NA	35.159
brain	primary_cancer	TCGA-HT-7689-01A-11R-2256-07	Brain Lower Grade Glioma	477e059b-1b0a-4f2b-b14d-8e1362fc38ee	NA	75.549
brain	metastasis	TCGA-DU-6404-02B-11R-A36H-07	Brain Lower Grade Glioma	af6191bb-b4c3-42ea-adc9-f6d45b00f0b0	NA	45.754
brain	primary_cancer	TCGA-HT-7902-01A-12R-2403-07	Brain Lower Grade Glioma	6fbc1aba-a377-4b7e-90ee-d86053187a67	NA	33.992
brain	primary_cancer	TCGA-S9-A7IQ-01A-21R-A34F-07	Brain Lower Grade Glioma	a107f9da-3537-4adf-a543-39cb692bdb80	NA	41.325
brain	primary_cancer	TCGA-06-0645-01A-01R-1849-01	Glioblastoma multiforme	6f9d76f0-ff61-4c58-ab2f-a7c84e9726e9	NA	18.734
brain	primary_cancer	TCGA-P5-A5F4-01A-11R-A28M-07	Brain Lower Grade Glioma	77b73b66-5ad9-49f4-9e75-f242cd316e2e	NA	67.757
brain	primary_cancer	TCGA-CS-5394-01A-01R-1470-07	Brain Lower Grade Glioma	84c59879-1b8a-4750-8069-9d0e434fa0dc	NA	73.769
brain	primary_cancer	TCGA-TM-A84H-01A-11R-A36H-07	Brain Lower Grade Glioma	784d798d-12cd-4714-ab4d-2191011c4a44	NA	85.578
brain	metastasis	TCGA-DU-6407-02A-12R-A36H-07	Brain Lower Grade Glioma	d63ec2f9-d8ca-4738-9d0f-00f93e7ac897	NA	47.083
brain	primary_cancer	TCGA-HT-7616-01A-11R-2256-07	Brain Lower Grade Glioma	31a34ec1-460d-4768-a8aa-03c81c3226be	NA	26.274
brain	primary_cancer	TCGA-DU-7018-01A-11R-2027-07	Brain Lower Grade Glioma	2ef476c6-ffb6-45b0-b92c-47808e9b4f10	NA	41.736
brain	metastasis	TCGA-TQ-A8XE-02A-11R-A36H-07	Brain Lower Grade Glioma	10d307ce-8b3b-4486-b199-d2722a964a35	NA	47.469
brain	primary_cancer	TCGA-DB-A64R-01A-11R-A29R-07	Brain Lower Grade Glioma	6589bdbc-b3a3-4949-8a08-3fd17952bf24	NA	74.261
brain	primary_cancer	TCGA-FG-A4MU-01B-11R-A28M-07	Brain Lower Grade Glioma	554bddc2-3afe-47d6-83c7-46cb30352df1	NA	28.677
brain	primary_cancer	TCGA-HW-7487-01A-11R-2027-07	Brain Lower Grade Glioma	75082199-c190-4838-8570-d172058bc98b	NA	35.158
brain	primary_cancer	TCGA-06-0743-01A-01R-1849-01	Glioblastoma multiforme	61677ea1-64a7-46e3-8b99-784ee9af1ba5	NA	34.568
brain	primary_cancer	TCGA-TM-A84L-01A-11R-A36H-07	Brain Lower Grade Glioma	d0f9781b-f735-4dd2-8813-f513692c0525	NA	74.799
brain	primary_cancer	TCGA-P5-A5F6-01A-11R-A28M-07	Brain Lower Grade Glioma	c66d3098-98b5-4e0a-a592-39ce259b2c86	NA	9.195
brain	primary_cancer	TCGA-P5-A5EZ-01A-11R-A27Q-07	Brain Lower Grade Glioma	3b93e6fa-c53b-4f8d-8d28-43926a1dae9d	NA	32.364
brain	primary_cancer	TCGA-DU-A7T8-01A-21R-A34R-07	Brain Lower Grade Glioma	05c3a0c4-87d0-409d-a4d4-7b5f6c3ab9e2	NA	61.731
brain	primary_cancer	TCGA-06-5412-01A-01R-1849-01	Glioblastoma multiforme	d39f75a1-3216-4f0a-86d2-0055feced3dd	NA	19.752
brain	primary_cancer	TCGA-P5-A737-01A-11R-A32Q-07	Brain Lower Grade Glioma	f2efed52-3995-4a64-a845-2b50517c9554	NA	55.493
brain	primary_cancer	TCGA-HT-7469-01A-11R-2256-07	Brain Lower Grade Glioma	905404ec-68c8-45d8-a9ad-ec08cbe207f4	NA	64.717
brain	primary_cancer	TCGA-P5-A735-01A-11R-A32Q-07	Brain Lower Grade Glioma	cc2965b7-e059-4cf7-8f10-133903d70a4c	NA	76.952
brain	metastasis	TCGA-DU-6407-02B-11R-A36H-07	Brain Lower Grade Glioma	1cd76b6a-a698-46cd-9594-decc4ebf24e4	NA	32.976
brain	primary_cancer	TCGA-06-0878-01A-01R-1849-01	Glioblastoma multiforme	903d756b-42ba-49bd-9a53-085b3211d8a7	NA	30.71
brain	primary_cancer	TCGA-DU-A76L-01A-11R-A32Q-07	Brain Lower Grade Glioma	8e2c16f2-38cc-49ad-adca-dbe5f4e0bf7f	NA	14.265
brain	primary_cancer	TCGA-S9-A7R4-01A-12R-A34R-07	Brain Lower Grade Glioma	eeaff3a7-d9d4-41b9-8c58-52e16f6a71a0	NA	40.099
brain	primary_cancer	TCGA-TQ-A7RG-01A-11R-A33Z-07	Brain Lower Grade Glioma	3e1936a4-80e8-42a0-8af6-4db305987cb0	NA	68.818
brain	primary_cancer	TCGA-HT-7472-01A-11R-2027-07	Brain Lower Grade Glioma	cf6bfd15-1f21-48ab-975d-5e211c8b2fba	NA	74.872
brain	primary_cancer	TCGA-DU-A6S2-01A-21R-A32Q-07	Brain Lower Grade Glioma	4c7061f2-ff48-4079-97b6-7ae3c7c0f905	NA	41.436
brain	primary_cancer	TCGA-HT-7694-01A-11R-2256-07	Brain Lower Grade Glioma	17d328ce-367a-47c4-8f70-7f4644b37506	NA	36.545
brain	primary_cancer	TCGA-DU-6407-01A-13R-1708-07	Brain Lower Grade Glioma	106c0a27-64c4-4496-83f3-1c05df492fd2	NA	117.802
brain	primary_cancer	TCGA-E1-A7YK-01A-11R-A34F-07	Brain Lower Grade Glioma	b42c2efe-b9d1-49da-8aa0-3d49bb3fb02f	NA	32.671
brain	primary_cancer	TCGA-HT-7477-01B-11R-A28M-07	Brain Lower Grade Glioma	5acf54e5-2288-4b40-b6f1-3ce549eceb36	NA	46.291
brain	primary_cancer	TCGA-DB-5273-01A-01R-1470-07	Brain Lower Grade Glioma	ed075623-6495-4eab-a15d-ab68d5ca0999	NA	72.827
brain	primary_cancer	TCGA-TM-A84F-01A-11R-A36H-07	Brain Lower Grade Glioma	56d2252e-b66f-405f-9d97-7ea5432f1f68	NA	54.715
brain	primary_cancer	TCGA-HT-7884-01B-11R-2403-07	Brain Lower Grade Glioma	aedec7d6-da5f-414f-b200-3b2dc7535182	NA	58.979
brain	metastasis	TCGA-DH-A669-02A-11R-A31N-07	Brain Lower Grade Glioma	2b35c088-4a94-44a1-9809-6666bc0c877f	NA	40.241
brain	primary_cancer	TCGA-HT-A5RB-01A-11R-A28M-07	Brain Lower Grade Glioma	53caa54a-c88e-423e-a33c-9e8d69daf2cd	NA	67.295
brain	primary_cancer	TCGA-19-2619-01A-01R-1850-01	Glioblastoma multiforme	adafa15c-5834-427e-bc93-24d3c4f775a9	NA	81.177
brain	primary_cancer	TCGA-FG-7634-01A-11R-2090-07	Brain Lower Grade Glioma	afbe6025-3c74-403b-ad84-c89f312d50c5	NA	56.463
brain	primary_cancer	TCGA-DU-7292-01A-11R-2027-07	Brain Lower Grade Glioma	fe9eb79d-a750-4830-9db4-32ea4034cb39	NA	49.109
brain	primary_cancer	TCGA-F6-A8O3-01A-11R-A36H-07	Brain Lower Grade Glioma	c7a90fef-6f1f-49ea-a8b8-b0e03e7584b1	NA	91.696
brain	primary_cancer	TCGA-06-2567-01A-01R-1849-01	Glioblastoma multiforme	e99614f9-51d8-4096-83af-8effd5266881	NA	84.927
brain	primary_cancer	TCGA-QH-A6XA-01A-12R-A32Q-07	Brain Lower Grade Glioma	fdced5ba-d0d5-4e07-b001-9d740cc48898	NA	56.923
brain	primary_cancer	TCGA-WY-A859-01A-12R-A36H-07	Brain Lower Grade Glioma	d8c06e36-816f-420e-9b5b-68f2e9417e96	NA	58.545
brain	primary_cancer	TCGA-DB-A4XA-01A-11R-A26U-07	Brain Lower Grade Glioma	9ea1bff8-51a1-4773-851c-5c8da0e79565	NA	56.922
brain	primary_cancer	TCGA-HT-7881-01A-11R-2403-07	Brain Lower Grade Glioma	b675a1c5-e16c-427d-9c47-1b75e8e51f4d	NA	38.907
brain	primary_cancer	TCGA-HT-7611-01A-11R-2403-07	Brain Lower Grade Glioma	e4762187-c19b-40d5-8385-ecb21f3ec6c3	NA	113.668
brain	primary_cancer	TCGA-32-1970-01A-01R-1850-01	Glioblastoma multiforme	a344de7b-5980-4612-9d58-1c8058a2bfd9	NA	53.936
brain	primary_cancer	TCGA-FG-5962-01B-11R-1896-07	Brain Lower Grade Glioma	2480b239-1454-4f49-9c13-381b9f0d0506	NA	67.21
brain	primary_cancer	TCGA-TQ-A7RW-01A-11R-A33Z-07	Brain Lower Grade Glioma	5c27c4d4-b3e7-4e44-a2c4-764b665d1bc0	NA	48.797
brain	primary_cancer	TCGA-12-5299-01A-02R-1849-01	Glioblastoma multiforme	f4d31bec-0bf5-4f59-ae0e-37170f1b692e	NA	38.561
brain	primary_cancer	TCGA-06-0139-01A-01R-1849-01	Glioblastoma multiforme	0a0d57c8-f137-4ae6-8d36-b8b8e402ccd4	NA	6.838
brain	primary_cancer	TCGA-06-2561-01A-02R-1849-01	Glioblastoma multiforme	ec85fbac-e181-4559-b601-d2efe44e37a8	NA	25.231
brain	primary_cancer	TCGA-HW-7491-01A-11R-2027-07	Brain Lower Grade Glioma	1a2ee9d7-2ef4-4247-9f29-cc1caaabaa5f	NA	85.332
brain	primary_cancer	TCGA-P5-A5EY-01A-11R-A27Q-07	Brain Lower Grade Glioma	c0c1d679-b9d4-4146-bf2e-7816648ef557	NA	48.076
brain	primary_cancer	TCGA-TQ-A7RF-01A-11R-A33Z-07	Brain Lower Grade Glioma	b3c8bb05-15a1-483a-a93e-a7733e32f983	NA	89.407
brain	primary_cancer	TCGA-DB-A64L-01A-11R-A29R-07	Brain Lower Grade Glioma	c0727365-8495-4a96-85b0-4a685627839e	NA	28.154
brain	primary_cancer	TCGA-DU-A76O-01A-11R-A32Q-07	Brain Lower Grade Glioma	481d7eb6-90ed-4d5c-8b98-4a46777a1b8c	NA	46.388
brain	primary_cancer	TCGA-02-0047-01A-01R-1849-01	Glioblastoma multiforme	95d8884d-0961-4070-be07-55dce4c7bc8f	NA	41.312
brain	primary_cancer	TCGA-FG-7636-01A-11R-2090-07	Brain Lower Grade Glioma	89e158ef-3b5a-4d90-9206-b2200a5a343e	NA	80.278
brain	primary_cancer	TCGA-KT-A74X-01A-11R-A32Q-07	Brain Lower Grade Glioma	bc32671c-a95d-4a44-a42a-dcc617cf68f1	NA	73.232
brain	primary_cancer	TCGA-HT-7468-01A-11R-2027-07	Brain Lower Grade Glioma	a40ec658-73b1-48d5-b9d1-51931e76bff0	NA	86.666
brain	primary_cancer	TCGA-19-5960-01A-11R-1850-01	Glioblastoma multiforme	c0c714ac-aa74-4702-8c3b-704f6e549276	NA	44.007
brain	primary_cancer	TCGA-HT-7473-01A-11R-2027-07	Brain Lower Grade Glioma	34f24020-97fd-4ead-a681-fb4d3957ea83	NA	122.319
brain	primary_cancer	TCGA-S9-A7IX-01A-12R-A34F-07	Brain Lower Grade Glioma	89b94310-c189-405f-8d43-5c52922f2eea	NA	36.273
brain	primary_cancer	TCGA-HT-7620-01A-11R-2256-07	Brain Lower Grade Glioma	62b17846-7d74-4a34-bbed-48c4c9e462f9	NA	42.654
brain	primary_cancer	TCGA-HT-A617-01A-11R-A29R-07	Brain Lower Grade Glioma	e621d7be-8167-4260-adff-ce1b57202eaf	NA	39.621
brain	primary_cancer	TCGA-CS-5395-01A-01R-1470-07	Brain Lower Grade Glioma	6ff35e89-30b4-447e-9ef5-b67210b7859d	NA	141.018
brain	primary_cancer	TCGA-FG-A4MW-01A-11R-A26U-07	Brain Lower Grade Glioma	4f8e3c28-cdc9-43bb-a27c-2dd02c4c9c71	NA	18.801
brain	primary_cancer	TCGA-DU-A5TS-01A-11R-A28M-07	Brain Lower Grade Glioma	03fd710d-d09a-4cf1-b513-5eaaa37d56da	NA	54.724
brain	primary_cancer	TCGA-E1-A7YS-01A-11R-A34F-07	Brain Lower Grade Glioma	6a8d76ce-107a-48a4-ada7-d136ef547915	NA	46.587
brain	primary_cancer	TCGA-06-2570-01A-01R-1849-01	Glioblastoma multiforme	48724ea4-25f1-463c-883a-69897e7d9a41	NA	48.437
brain	primary_cancer	TCGA-TQ-A7RS-01A-12R-A33Z-07	Brain Lower Grade Glioma	65f141fb-b893-4254-83e8-b8989bf01cf1	NA	67.266
brain	primary_cancer	TCGA-06-2558-01A-01R-1849-01	Glioblastoma multiforme	8fdc3c56-a96b-4cad-983a-12e6ef373069	NA	40.104
brain	primary_cancer	TCGA-E1-A7Z6-01A-11R-A34R-07	Brain Lower Grade Glioma	1adce1ae-0823-4259-82bf-2b8b72827d58	NA	111.786
brain	primary_cancer	TCGA-FG-A87N-01A-11R-A36H-07	Brain Lower Grade Glioma	e5686a63-293f-4d7e-bb7a-c0ad2769cfb4	NA	37.698
brain	primary_cancer	TCGA-76-4927-01A-01R-1850-01	Glioblastoma multiforme	777c1ad8-ae6d-4c17-ad59-8b26adb67a1b	NA	42.656
brain	primary_cancer	TCGA-DB-A4XE-01A-11R-A27Q-07	Brain Lower Grade Glioma	a622534d-0108-4890-a0c5-4d1e12c25e44	NA	76.972
brain	primary_cancer	TCGA-26-5132-01A-01R-1850-01	Glioblastoma multiforme	31398055-e000-4ca1-a37d-aac2df5920b4	NA	34.432
brain	primary_cancer	TCGA-HT-7608-01A-11R-2090-07	Brain Lower Grade Glioma	65a188b3-1fc9-4021-bc3e-158c0cce2c8e	NA	92.54
brain	primary_cancer	TCGA-06-0129-01A-01R-1849-01	Glioblastoma multiforme	17c98d8c-8bd4-4b16-a384-0497d730f497	NA	46.055
brain	primary_cancer	TCGA-KT-A7W1-01A-11R-A34F-07	Brain Lower Grade Glioma	b817310e-3a4b-4622-8564-350ccb0a9e69	NA	59.688
brain	primary_cancer	TCGA-15-1444-01A-02R-1850-01	Glioblastoma multiforme	95e1423d-5a12-49cf-841d-1521593a874f	NA	70.341
brain	primary_cancer	TCGA-CS-6290-01A-11R-1708-07	Brain Lower Grade Glioma	59b2f45a-f731-4ebc-9e7c-c9748aee3f60	NA	55.373
brain	primary_cancer	TCGA-32-2638-01A-01R-1850-01	Glioblastoma multiforme	eab1e09d-1ca3-484d-95d8-9fd5fa857f3d	NA	37.62
brain	primary_cancer	TCGA-E1-A7YH-01A-11R-A34F-07	Brain Lower Grade Glioma	b5c4c513-4800-405f-94d6-9fa4303292ef	NA	41.695
brain	primary_cancer	TCGA-DU-A5TT-01A-11R-A28M-07	Brain Lower Grade Glioma	8d1c0907-a5f9-4fcb-a04a-d554e40c23d3	NA	57.195
brain	primary_cancer	TCGA-DU-A7TB-01A-11R-A33Z-07	Brain Lower Grade Glioma	08199c9b-9dc5-4f59-a1b8-324bd0a5f7c3	NA	29.358
brain	primary_cancer	TCGA-VM-A8CB-01A-11R-A36H-07	Brain Lower Grade Glioma	b22b56c2-3e66-430b-b1a5-3441b30551c3	NA	27.977
brain	primary_cancer	TCGA-19-2620-01A-01R-1850-01	Glioblastoma multiforme	497fcc98-1eeb-4696-88eb-22fc99627695	NA	53.135
brain	primary_cancer	TCGA-12-0616-01A-01R-1849-01	Glioblastoma multiforme	23c2c2d5-d035-4875-a109-aa0a4c34c20e	NA	20.452
brain	primary_cancer	TCGA-TQ-A7RR-01A-21R-A34F-07	Brain Lower Grade Glioma	76a648cc-8673-478f-a2f5-c0830378f1e4	NA	48.903
brain	primary_cancer	TCGA-E1-A7YD-01A-11R-A34F-07	Brain Lower Grade Glioma	0eb7a942-eea5-4de3-add4-724f69a6f80c	NA	44.851
brain	primary_cancer	TCGA-HT-8104-01A-11R-2404-07	Brain Lower Grade Glioma	3c4590d9-788e-4e04-a7e8-b912698ebb74	NA	50.107
brain	primary_cancer	TCGA-DU-A6S8-01A-12R-A32Q-07	Brain Lower Grade Glioma	a4d5d968-7d95-4f41-b0ce-b2dcc9a073ea	NA	38.961
brain	primary_cancer	TCGA-DU-A6S6-01A-21R-A32Q-07	Brain Lower Grade Glioma	f523f957-9d71-49a4-8c2d-b6a1301f49ed	NA	75.807
brain	primary_cancer	TCGA-E1-A7YL-01A-11R-A34F-07	Brain Lower Grade Glioma	f42762c7-478e-497f-82c2-fc36a359a6ba	NA	21.379
brain	primary_cancer	TCGA-TM-A84M-01A-11R-A36H-07	Brain Lower Grade Glioma	4d4f086b-9706-4fc5-b19b-33270daf8970	NA	74.886
brain	primary_cancer	TCGA-CS-6668-01A-11R-1896-07	Brain Lower Grade Glioma	129df624-1d84-49b8-ab0e-0001cc150607	NA	76.633
brain	primary_cancer	TCGA-HT-7606-01A-11R-2090-07	Brain Lower Grade Glioma	faeb1918-077c-417e-9acc-9733b756511c	NA	59.187
brain	primary_cancer	TCGA-HT-8110-01A-11R-2404-07	Brain Lower Grade Glioma	3a1dd504-78ab-4d25-8f28-2f077a511946	NA	42.414
brain	primary_cancer	TCGA-DB-A64X-01A-11R-A29R-07	Brain Lower Grade Glioma	fd77ef17-3190-4889-a51b-456313411882	NA	67.473
brain	metastasis	TCGA-TM-A7CF-02A-11R-A32Q-07	Brain Lower Grade Glioma	f5bb6d6f-70b2-495b-9638-2527ba6b8aa1	NA	50.525
brain	primary_cancer	TCGA-S9-A6WH-01A-12R-A33Z-07	Brain Lower Grade Glioma	99fc1613-6b74-4177-a326-e8442a489571	NA	62.289
brain	primary_cancer	TCGA-E1-A7YW-01A-11R-A34R-07	Brain Lower Grade Glioma	5db0c888-986f-4a3e-af64-c15ad413e14d	NA	64.555
brain	primary_cancer	TCGA-E1-5311-01A-01R-1470-07	Brain Lower Grade Glioma	4daa80a9-f1f3-4b9e-ac8c-e5ee9f276360	NA	67.348
brain	primary_cancer	TCGA-HT-7686-01A-11R-2256-07	Brain Lower Grade Glioma	65955c38-4907-4b09-8ef6-94a6b9ff5817	NA	38.237
brain	primary_cancer	TCGA-HT-7605-01A-11R-2090-07	Brain Lower Grade Glioma	ba1613b5-3076-4fc5-8da0-f0e951d077ef	NA	62.881
brain	primary_cancer	TCGA-DB-5270-01A-02R-1470-07	Brain Lower Grade Glioma	6679ab80-6b49-4779-88e8-a311e16c96f7	NA	53.061
brain	primary_cancer	TCGA-FG-A4MX-01A-11R-A26U-07	Brain Lower Grade Glioma	ccf08a46-d1e6-4f3d-a511-6a1560a8dc52	NA	6.584
brain	primary_cancer	TCGA-S9-A6U6-01A-12R-A33Z-07	Brain Lower Grade Glioma	dfcfc10d-04ed-495a-9fc4-a5d7af4d5b03	NA	48.848
brain	primary_cancer	TCGA-DU-6405-01A-11R-1708-07	Brain Lower Grade Glioma	ab2b78d1-773b-4935-b458-60befcf470af	NA	118.793
brain	primary_cancer	TCGA-FG-8186-01A-11R-2256-07	Brain Lower Grade Glioma	7f5d8015-9a38-4d1c-b63d-2d5a0b882259	NA	74.012
brain	primary_cancer	TCGA-06-2563-01A-01R-1849-01	Glioblastoma multiforme	c893538c-d12c-4dd1-a3fd-cba6a847c14e	NA	31.859
brain	primary_cancer	TCGA-S9-A6TW-01A-12R-A32Q-07	Brain Lower Grade Glioma	e32dbf45-c066-454e-8b38-85d52151f623	NA	25.239
brain	primary_cancer	TCGA-DU-7294-01A-11R-2027-07	Brain Lower Grade Glioma	25a13ca2-fb62-40aa-bec5-a8bf83a9360b	NA	55.068
brain	primary_cancer	TCGA-26-5135-01A-01R-1850-01	Glioblastoma multiforme	cea49633-24f0-48c4-b2d0-fed47d5364e6	NA	26.326
brain	primary_cancer	TCGA-HT-A74K-01A-11R-A32Q-07	Brain Lower Grade Glioma	46bc5230-2912-4e5e-a5c0-7a2f5aa6b682	NA	26.489
brain	primary_cancer	TCGA-S9-A6TZ-01A-21R-A32Q-07	Brain Lower Grade Glioma	ede9effc-6462-4ecc-9be3-2ec0bb4d7c2f	NA	88.939
brain	primary_cancer	TCGA-VM-A8CD-01A-11R-A36H-07	Brain Lower Grade Glioma	721a570e-56ea-4054-98c1-9ac2105c33ca	NA	27.161
brain	primary_cancer	TCGA-06-0174-01A-01R-1849-01	Glioblastoma multiforme	2cd6082b-d5e7-45a1-96f9-8ef4cccf8533	NA	29.745
brain	primary_cancer	TCGA-HT-7480-01A-11R-2090-07	Brain Lower Grade Glioma	1eb669bc-04cc-474a-baae-cba7bea98a18	NA	70.944
brain	primary_cancer	TCGA-DU-A76K-01A-11R-A33Z-07	Brain Lower Grade Glioma	f547ce5b-634d-4faa-b662-70de36194dfc	NA	82.247
brain	primary_cancer	TCGA-S9-A6WQ-01A-12R-A34F-07	Brain Lower Grade Glioma	be1d4fc0-02a0-4932-b836-bf68f89455c7	NA	43.567
brain	primary_cancer	TCGA-FG-6692-01A-11R-1896-07	Brain Lower Grade Glioma	fca6dae9-687d-418d-bf8b-61bbf6927f61	NA	22.737
brain	primary_cancer	TCGA-P5-A5EW-01A-11R-A27Q-07	Brain Lower Grade Glioma	ab00d03b-2579-491b-a23a-7ec63d0852ff	NA	116.758
brain	primary_cancer	TCGA-HT-7695-01A-11R-2256-07	Brain Lower Grade Glioma	4ae49c4c-909f-48f0-8905-f27879c29426	NA	65.79
brain	primary_cancer	TCGA-S9-A7R3-01A-11R-A34R-07	Brain Lower Grade Glioma	2a73d13f-1bbb-4591-9524-181d9539d3ae	NA	76.897
brain	primary_cancer	TCGA-P5-A733-01A-11R-A32Q-07	Brain Lower Grade Glioma	0d3127f8-b7f0-4752-af62-4b093f959b27	NA	37.111
brain	primary_cancer	TCGA-HT-8563-01A-11R-2404-07	Brain Lower Grade Glioma	456b83a3-79b9-41ec-8745-95c57c67ab60	NA	21.808
brain	primary_cancer	TCGA-DB-A4XG-01A-11R-A27Q-07	Brain Lower Grade Glioma	10bc3c22-c4ff-4d44-a44b-dc8dd2cbec2d	NA	50.341
brain	primary_cancer	TCGA-28-2513-01A-01R-1850-01	Glioblastoma multiforme	9b9ba1cf-67be-4d74-90c5-fd86f4a5317f	NA	11.37
brain	primary_cancer	TCGA-HT-A5RC-01A-11R-A28M-07	Brain Lower Grade Glioma	07c85322-ff5e-4e17-b6d8-bec6305fe14e	NA	47.899
brain	primary_cancer	TCGA-76-4925-01A-01R-1850-01	Glioblastoma multiforme	03422479-a670-44ed-a9f7-33f4554ef6f6	NA	39.289
brain	primary_cancer	TCGA-76-4932-01A-01R-1850-01	Glioblastoma multiforme	ebadf417-08e8-4e89-bc8b-f7a74b0fc781	NA	55.392
brain	primary_cancer	TCGA-28-5209-01A-01R-1850-01	Glioblastoma multiforme	7a904020-5345-4d1f-8493-8dd07d45faa3	NA	52.046
brain	primary_cancer	TCGA-HT-8010-01A-11R-2403-07	Brain Lower Grade Glioma	f4a540b2-5ad6-442b-b454-cdb23a4cbacc	NA	54.284
brain	primary_cancer	TCGA-HT-7693-01A-11R-2256-07	Brain Lower Grade Glioma	26c57d9f-1ee1-4c64-9b42-e00aed49d22d	NA	59.298
brain	primary_cancer	TCGA-DH-A7UU-01A-12R-A34F-07	Brain Lower Grade Glioma	b2641e23-6021-4679-90d9-1cfd67619dbc	NA	56.752
brain	primary_cancer	TCGA-VM-A8CH-01A-12R-A36H-07	Brain Lower Grade Glioma	bd46f867-070c-49a3-9180-8c78b72183a8	NA	48.57
brain	primary_cancer	TCGA-FG-7638-01B-12R-2090-07	Brain Lower Grade Glioma	11b3ce08-d237-4e4e-8656-a235d3964f8f	NA	58.392
brain	primary_cancer	TCGA-HT-7875-01A-11R-2403-07	Brain Lower Grade Glioma	8028a19b-10cf-4eb9-84ec-d61558b9976b	NA	76.223
brain	primary_cancer	TCGA-06-2557-01A-01R-1849-01	Glioblastoma multiforme	84d56a0b-6ee1-4fe7-9491-d8815af1d6f5	NA	31.195
brain	primary_cancer	TCGA-HT-8113-01A-11R-2404-07	Brain Lower Grade Glioma	fad69aee-febe-4893-86a4-e71c0b22b9f4	NA	31.524
brain	primary_cancer	TCGA-DU-5849-01A-11R-1708-07	Brain Lower Grade Glioma	e1ecb6d0-8ceb-46b8-9959-86f8d53b0882	NA	52.598
brain	primary_cancer	TCGA-12-3650-01A-01R-1849-01	Glioblastoma multiforme	5522993c-6439-483c-97a6-843026d5198b	NA	29.067
brain	primary_cancer	TCGA-DB-A4X9-01A-11R-A26U-07	Brain Lower Grade Glioma	66a0dece-b8d0-4d6a-a6d9-53985a507f77	NA	117.961
brain	primary_cancer	TCGA-RY-A83Y-01A-11R-A36H-07	Brain Lower Grade Glioma	55c39d1f-7300-42e9-8205-d919cdddf558	NA	52.861
brain	primary_cancer	TCGA-02-2485-01A-01R-1849-01	Glioblastoma multiforme	102a0737-7d27-46b8-a433-4f1bb5300858	NA	61.583
brain	primary_cancer	TCGA-TM-A84J-01A-11R-A36H-07	Brain Lower Grade Glioma	549b2c27-188c-4c0b-b451-4507ef46a561	NA	45.282
brain	primary_cancer	TCGA-DH-A66D-01A-11R-A31N-07	Brain Lower Grade Glioma	a3ea8ef1-79f5-48fc-906d-dfb2b550c466	NA	71.234
brain	primary_cancer	TCGA-DH-A66G-01A-21R-A31N-07	Brain Lower Grade Glioma	eab993b0-cf52-4a95-8da3-8e1c5eaa3eff	NA	55.065
brain	primary_cancer	TCGA-RY-A843-01A-11R-A36H-07	Brain Lower Grade Glioma	2dc97660-d26f-49a4-9e47-3678a3768724	NA	40.49
brain	primary_cancer	TCGA-TQ-A8XE-01A-11R-A36H-07	Brain Lower Grade Glioma	2593a422-98ab-4221-b22b-476e05df9ca0	NA	81.564
brain	primary_cancer	TCGA-HT-7604-01A-11R-2090-07	Brain Lower Grade Glioma	09500c89-0578-415c-9df3-73ae02acbdab	NA	81.273
brain	primary_cancer	TCGA-S9-A7QX-01A-11R-A34F-07	Brain Lower Grade Glioma	61e3d965-e391-4699-b862-37000eadef7f	NA	46.528
brain	primary_cancer	TCGA-HW-7486-01A-11R-2027-07	Brain Lower Grade Glioma	2c56dc64-28cf-4b56-ac9d-1d7b906fd56d	NA	55.788
brain	primary_cancer	TCGA-QH-A6CY-01A-11R-A32Q-07	Brain Lower Grade Glioma	6369f5c8-dbd0-4c80-a621-5c3310ebad45	NA	47.198
brain	primary_cancer	TCGA-FG-6690-01A-11R-1896-07	Brain Lower Grade Glioma	d90e0cc1-db21-49e6-87f4-a3328ffc1396	NA	57.724
brain	primary_cancer	TCGA-DB-A75P-01A-11R-A32Q-07	Brain Lower Grade Glioma	eaf06648-a8ec-4813-8618-0ccf86d0f809	NA	54.335
brain	primary_cancer	TCGA-CS-4944-01A-01R-1470-07	Brain Lower Grade Glioma	3ddd5316-2077-41c0-87fa-80be17d77f2b	NA	89.579
brain	primary_cancer	TCGA-76-4928-01B-01R-1850-01	Glioblastoma multiforme	ca6d5ed3-f6f7-4dde-be24-7652d7dfab16	NA	21.063
brain	primary_cancer	TCGA-DH-A66B-01A-11R-A29R-07	Brain Lower Grade Glioma	90199c77-d6ef-4a7a-b08c-28bed0c888b1	NA	63.88
brain	primary_cancer	TCGA-P5-A731-01A-11R-A32Q-07	Brain Lower Grade Glioma	5a57bf22-5617-4ea0-887e-0610fff74790	NA	74.669
brain	primary_cancer	TCGA-P5-A5EV-01A-11R-A27Q-07	Brain Lower Grade Glioma	c19b30b4-b9cc-41cb-ac23-b27a1b6e6889	NA	84.269
brain	primary_cancer	TCGA-FG-6691-01A-11R-1896-07	Brain Lower Grade Glioma	58c05288-0bc7-4e19-8055-5284c2714c21	NA	85.545
brain	primary_cancer	TCGA-28-2499-01A-01R-1850-01	Glioblastoma multiforme	1dd740dc-2752-4511-ac12-45766c8e2737	NA	36.709
brain	primary_cancer	TCGA-06-0156-01A-03R-1849-01	Glioblastoma multiforme	67b4bd07-77fd-4595-b2a0-5f3a3a43a221	NA	16.781
brain	primary_cancer	TCGA-QH-A6CX-01A-11R-A32Q-07	Brain Lower Grade Glioma	caba02b8-ffcf-440f-ab03-6141aa19752f	NA	24.491
brain	primary_cancer	TCGA-41-2571-01A-01R-1850-01	Glioblastoma multiforme	a7433808-7fb3-4909-92ae-2d74b32886b0	NA	22.1
brain	primary_cancer	TCGA-27-1837-01A-01R-1850-01	Glioblastoma multiforme	6a85fda0-3e2d-4bd8-ba44-5ce821c39504	NA	52.271
brain	metastasis	TCGA-14-1402-02A-01R-2005-01	Glioblastoma multiforme	d8164b02-4b3c-454d-945b-2838edb1b5b1	NA	17.515
brain	primary_cancer	TCGA-HT-8015-01B-11R-A28M-07	Brain Lower Grade Glioma	32791ace-3fb3-43cb-8f98-278ac1e18a25	NA	37.69
brain	primary_cancer	TCGA-TQ-A7RP-01A-21R-A34F-07	Brain Lower Grade Glioma	264d433e-545e-47cd-9779-7fce4237278b	NA	47.975
brain	primary_cancer	TCGA-19-2629-01A-01R-1850-01	Glioblastoma multiforme	56a705f4-fd28-44ff-8a3c-85bc4300c760	NA	15.024
brain	primary_cancer	TCGA-RY-A840-01A-11R-A36H-07	Brain Lower Grade Glioma	2e4d2d19-c416-4ff3-986e-66e40fca946c	NA	42.502
brain	primary_cancer	TCGA-TM-A84B-01A-11R-A36H-07	Brain Lower Grade Glioma	c7554894-f361-4d97-8c1b-91925679143c	NA	81.771
brain	primary_cancer	TCGA-CS-6188-01A-11R-1896-07	Brain Lower Grade Glioma	66770b06-2cd6-4773-b8e8-5b38faa4f5a4	NA	29.138
brain	primary_cancer	TCGA-RY-A845-01A-11R-A36H-07	Brain Lower Grade Glioma	a57d41bc-71b6-4215-804a-d66071f60594	NA	68.777
brain	primary_cancer	TCGA-19-1787-01B-01R-1850-01	Glioblastoma multiforme	5d40c2af-b2e9-407c-be1f-780a9071fbe7	NA	30.812
brain	primary_cancer	TCGA-06-5417-01A-01R-1849-01	Glioblastoma multiforme	b1019532-963f-4c8e-ba55-b03dea8b5498	NA	44.275
brain	primary_cancer	TCGA-DU-6406-01A-11R-1708-07	Brain Lower Grade Glioma	9af14bce-1e74-4b8a-aa17-049ff4d45db6	NA	58.476
brain	primary_cancer	TCGA-S9-A7J3-01A-21R-A34R-07	Brain Lower Grade Glioma	4799ffc2-7be5-48f3-9ab1-624eeb3ec6ee	NA	59.793
brain	primary_cancer	TCGA-R8-A73M-01A-11R-A32Q-07	Brain Lower Grade Glioma	e49a9619-3446-4862-8b91-d429d95197cb	NA	66.716
brain	primary_cancer	TCGA-CS-5390-01A-02R-1470-07	Brain Lower Grade Glioma	d6d3dab0-2580-41f9-975b-f12b390034fd	NA	55.07
brain	primary_cancer	TCGA-DU-7302-01A-11R-2090-07	Brain Lower Grade Glioma	10336d59-9732-4305-9062-75bc76ee9c93	NA	180.063
brain	primary_cancer	TCGA-DU-6402-01A-11R-1708-07	Brain Lower Grade Glioma	51f1ccc5-2481-4a1a-8892-c0728d1c9869	NA	12.993
brain	primary_cancer	TCGA-TQ-A7RM-01A-11R-A33Z-07	Brain Lower Grade Glioma	ea076ed3-74cd-4313-83d0-a99873058fd7	NA	72.408
brain	primary_cancer	TCGA-06-0749-01A-01R-1849-01	Glioblastoma multiforme	eb455c55-74ac-4303-b149-475ffe21e3c6	NA	29.298
brain	primary_cancer	TCGA-TQ-A7RO-01A-11R-A33Z-07	Brain Lower Grade Glioma	1de2f338-b16d-40ab-ac9b-8b175c9bb459	NA	73.617
brain	primary_cancer	TCGA-HT-7470-01A-12R-2090-07	Brain Lower Grade Glioma	31f32186-f631-434d-9c00-f2bbd4cced40	NA	64.367
brain	primary_cancer	TCGA-FG-A6J1-01A-11R-A31N-07	Brain Lower Grade Glioma	16b68870-facd-4071-ba84-b30b2c60bc81	NA	56.294
brain	primary_cancer	TCGA-HT-8114-01A-11R-2404-07	Brain Lower Grade Glioma	5007c6f5-2134-4d0e-8d53-13a0f1439d9e	NA	78.607
brain	primary_cancer	TCGA-28-5216-01A-01R-1850-01	Glioblastoma multiforme	570d3a26-6bcf-4442-aba9-95a01e84aa16	NA	17.368
brain	primary_cancer	TCGA-HT-A74H-01A-11R-A32Q-07	Brain Lower Grade Glioma	d450a178-59b3-4dd1-9eeb-8ef305df02ef	NA	56.117
brain	metastasis	TCGA-06-0171-02A-11R-2005-01	Glioblastoma multiforme	01b7a29e-0d3a-4a18-8cb6-f8a329f9d6e6	NA	28.361
brain	primary_cancer	TCGA-TM-A7C4-01A-11R-A32Q-07	Brain Lower Grade Glioma	21ff9c47-d971-4c0f-b9ff-103a817f5eb4	NA	50.188
brain	primary_cancer	TCGA-32-5222-01A-01R-1850-01	Glioblastoma multiforme	f5fffae0-0fbe-40f8-93d7-525407048620	NA	13.441
brain	primary_cancer	TCGA-27-2526-01A-01R-1850-01	Glioblastoma multiforme	f026a95f-89a7-464f-a8f2-ea036fe1774f	NA	43.464
brain	primary_cancer	TCGA-HT-7684-01A-11R-2256-07	Brain Lower Grade Glioma	2d0cb65e-cd71-431a-9eaa-9e0844446d63	NA	45.437
brain	primary_cancer	TCGA-S9-A7J0-01A-11R-A34F-07	Brain Lower Grade Glioma	a29047f8-3b74-4bf4-87ec-2f8b5435eba7	NA	39.121
brain	primary_cancer	TCGA-DH-A7US-01A-11R-A33Z-07	Brain Lower Grade Glioma	f2996be3-1bd5-43c8-9d91-728948c78994	NA	81.493
brain	primary_cancer	TCGA-28-5215-01A-01R-1850-01	Glioblastoma multiforme	05a2eea8-f366-4ae7-80f3-03324fb6e66e	NA	34.177
brain	primary_cancer	TCGA-VM-A8CA-01A-11R-A36H-07	Brain Lower Grade Glioma	9fd5e9bf-8c29-4efc-bd33-1ed483153175	NA	44.398
brain	primary_cancer	TCGA-R8-A6MO-01A-11R-A33Z-07	Brain Lower Grade Glioma	cfdc2b0d-f87c-46fd-81b0-0eab963f8871	NA	44.319
brain	primary_cancer	TCGA-DU-A5TW-01A-11R-A28M-07	Brain Lower Grade Glioma	88c0efcd-cbd2-4c36-b19e-dcb675c4aaae	NA	60.169
brain	primary_cancer	TCGA-06-0138-01A-02R-1849-01	Glioblastoma multiforme	6f2fedb4-66e2-48fd-8744-cbd30075bb03	NA	16.216
brain	primary_cancer	TCGA-02-2483-01A-01R-1849-01	Glioblastoma multiforme	35578669-fb40-49fa-b6b5-3bd0f239fa7e	NA	28.605
brain	primary_cancer	TCGA-HW-7495-01A-11R-2027-07	Brain Lower Grade Glioma	ba53832f-dfbc-4581-b7b1-cdc476174d72	NA	52.097
brain	primary_cancer	TCGA-HT-7601-01A-11R-2090-07	Brain Lower Grade Glioma	0b28fcb7-a5a5-41d1-b830-5f7c52d18e25	NA	40.866
brain	primary_cancer	TCGA-06-5413-01A-01R-1849-01	Glioblastoma multiforme	48f886d5-bb04-4fd1-809c-4b85730c4208	NA	54.984
brain	primary_cancer	TCGA-DU-8161-01A-11R-2256-07	Brain Lower Grade Glioma	6928f894-9d97-40c9-8284-3fd9456152de	NA	40.456
brain	primary_cancer	TCGA-S9-A6UA-01A-12R-A33Z-07	Brain Lower Grade Glioma	73227e22-1131-49b2-90d6-f30a6a076d8b	NA	28.791
brain	primary_cancer	TCGA-DU-5870-01A-11R-1708-07	Brain Lower Grade Glioma	f0b0d0c2-4b26-4cf9-b3c7-2f973f958729	NA	72.495
brain	primary_cancer	TCGA-F6-A8O4-01A-11R-A36H-07	Brain Lower Grade Glioma	f46aa5a4-ff0e-42cf-aea9-fd776ebf04cd	NA	100.855
brain	primary_cancer	TCGA-HT-7855-01A-11R-2403-07	Brain Lower Grade Glioma	3fea413e-d892-461c-b0e3-cf07efaf860c	NA	68.654
brain	primary_cancer	TCGA-41-4097-01A-01R-1850-01	Glioblastoma multiforme	4d2bc147-bed8-4621-be86-f32559f0ed91	NA	33.036
brain	primary_cancer	TCGA-06-2562-01A-01R-1849-01	Glioblastoma multiforme	497767ca-3148-46d2-b4fc-15530c678b0b	NA	32.561
brain	primary_cancer	TCGA-E1-A7YO-01A-11R-A34F-07	Brain Lower Grade Glioma	47b76f26-6ac6-482c-bb3d-315a18400927	NA	57.178
brain	primary_cancer	TCGA-DU-A6S3-01A-12R-A32Q-07	Brain Lower Grade Glioma	b8244afb-224b-4bd4-bd6d-caf6619f0e2a	NA	34.544
brain	primary_cancer	TCGA-TM-A7C5-01A-11R-A32Q-07	Brain Lower Grade Glioma	4e7bf9e5-e1a5-4a5b-8e32-0768fdf4a3cf	NA	54.149
brain	primary_cancer	TCGA-HT-7856-01A-11R-2403-07	Brain Lower Grade Glioma	b64f0c76-9109-4e22-9070-0e43837a10b3	NA	39.74
brain	primary_cancer	TCGA-FG-7643-01A-11R-2090-07	Brain Lower Grade Glioma	5a558400-4b95-4d48-abb3-a7b9576d9d94	NA	27.241
brain	primary_cancer	TCGA-FG-5965-01B-11R-1896-07	Brain Lower Grade Glioma	54cd0c71-61e8-47b1-a03b-9badeac15ca2	NA	76.585
brain	primary_cancer	TCGA-HT-7474-01A-11R-2027-07	Brain Lower Grade Glioma	f6a8512b-7649-4ca0-aa55-5bf468e8931e	NA	55.189
brain	primary_cancer	TCGA-06-0125-01A-01R-1849-01	Glioblastoma multiforme	ea85c76f-5334-495d-9615-d3f503c0d088	NA	45.712
brain	primary_cancer	TCGA-HW-A5KJ-01A-12R-A27Q-07	Brain Lower Grade Glioma	c026a9de-ad2b-4959-89c0-484f9d622dd9	NA	18.164
brain	primary_cancer	TCGA-06-0238-01A-02R-1849-01	Glioblastoma multiforme	a748d693-fae0-4fb6-ab1e-a347b4e9b7d2	NA	21.953
brain	primary_cancer	TCGA-QH-A65Z-01A-11R-A29R-07	Brain Lower Grade Glioma	671edd73-dbd4-4ab5-8988-864b8a7fe01a	NA	83.073
brain	primary_cancer	TCGA-HT-7676-01A-11R-2403-07	Brain Lower Grade Glioma	cb18ceb5-73e7-44d7-8ab0-96b832e980bd	NA	58.295
brain	primary_cancer	TCGA-26-5139-01A-01R-1850-01	Glioblastoma multiforme	10bfa2d8-228f-43d8-ae15-1f58c25d1be3	NA	32.533
brain	primary_cancer	TCGA-E1-A7YU-01A-11R-A34R-07	Brain Lower Grade Glioma	e6ae4f3a-a375-424d-8f22-b07d1b4904ef	NA	44.347
brain	primary_cancer	TCGA-CS-5396-01A-02R-1470-07	Brain Lower Grade Glioma	772424b5-73f8-434e-a565-1cde4aaa1126	NA	76.685
brain	primary_cancer	TCGA-DB-A4XH-01A-11R-A27Q-07	Brain Lower Grade Glioma	c335d5b6-f135-4bbc-825a-f6ed1746fa0e	NA	28.216
brain	primary_cancer	TCGA-HW-8321-01A-11R-2404-07	Brain Lower Grade Glioma	1c2c32ad-2bd5-4e5f-9784-014d41b96196	NA	51.345
brain	primary_cancer	TCGA-26-5136-01B-01R-1850-01	Glioblastoma multiforme	39b5a7b5-e2ec-442d-94c4-ba938ee79b97	NA	51.721
brain	primary_cancer	TCGA-HT-8012-01A-11R-2403-07	Brain Lower Grade Glioma	f389cc26-dd87-44ca-8ceb-fc926d073f4a	NA	65.81
brain	primary_cancer	TCGA-HT-7854-01A-11R-2256-07	Brain Lower Grade Glioma	3e7df498-0263-483e-98e8-e09324b5fae8	NA	51.692
brain	primary_cancer	TCGA-HT-8011-01A-11R-2403-07	Brain Lower Grade Glioma	11a26b32-d4df-468f-9a17-b89fba51cf88	NA	48.954
brain	primary_cancer	TCGA-FG-A60K-01A-11R-A29R-07	Brain Lower Grade Glioma	a8be2bbb-f0a6-40e6-af7a-ee9289e8ad44	NA	62.65
brain	primary_cancer	TCGA-HT-7874-01A-11R-2403-07	Brain Lower Grade Glioma	77366e1e-618f-433c-8e6b-e2046a876231	NA	45.605
brain	primary_cancer	TCGA-FG-5964-01A-11R-1708-07	Brain Lower Grade Glioma	69f6df2f-7cd7-4477-b464-1fd06bd1e9c8	NA	42.618
brain	primary_cancer	TCGA-CS-6667-01A-12R-2027-07	Brain Lower Grade Glioma	20108871-61a3-4160-8a9d-c5e4481143a6	NA	43.406
brain	primary_cancer	TCGA-S9-A7R2-01A-21R-A34R-07	Brain Lower Grade Glioma	315a7141-0f36-4cac-94a7-748849ee8926	NA	30.645
brain	primary_cancer	TCGA-HT-8558-01A-21R-2404-07	Brain Lower Grade Glioma	db75b249-f02e-47d8-ba4c-37a5ba7c4b33	NA	21.937
brain	primary_cancer	TCGA-FG-A710-01A-12R-A33Z-07	Brain Lower Grade Glioma	0aefc6e0-fd5e-430d-b4b7-e1d6c2168ae7	NA	58.978
brain	primary_cancer	TCGA-HW-7493-01A-11R-2027-07	Brain Lower Grade Glioma	663ec986-6cdd-4b8c-8d16-5f2afb5caad0	NA	93.019
brain	primary_cancer	TCGA-VM-A8CE-01A-11R-A36H-07	Brain Lower Grade Glioma	fc4a708f-1f6c-4ee8-bbc1-0a0ce1f37044	NA	51.616
brain	primary_cancer	TCGA-19-2625-01A-01R-1850-01	Glioblastoma multiforme	febcf9af-1a79-4234-a095-4efa3c3aa2bc	NA	21.927
brain	primary_cancer	TCGA-E1-A7Z3-01A-11R-A34R-07	Brain Lower Grade Glioma	6967eb73-0b93-48d3-bb43-583652eef2a4	NA	50.835
brain	primary_cancer	TCGA-S9-A6WO-01A-21R-A34F-07	Brain Lower Grade Glioma	da513205-f0c5-4649-9db4-edf417fbf53f	NA	65.421
brain	primary_cancer	TCGA-E1-5307-01A-01R-1896-07	Brain Lower Grade Glioma	8f248b27-4433-493d-87d7-e9e174317470	NA	98.954
brain	primary_cancer	TCGA-E1-5318-01A-01R-1470-07	Brain Lower Grade Glioma	149fe971-260e-4cbf-a5aa-41eca339847a	NA	46.192
brain	primary_cancer	TCGA-06-0686-01A-01R-1849-01	Glioblastoma multiforme	f2d1056f-1329-44e4-8269-0e7dde93d64a	NA	33.898
brain	primary_cancer	TCGA-14-1825-01A-01R-1850-01	Glioblastoma multiforme	33daf82d-0b4d-474e-84d7-f21c47077c95	NA	20.237
brain	primary_cancer	TCGA-E1-A7YE-01A-11R-A34F-07	Brain Lower Grade Glioma	cd935b60-ed16-4f34-98ad-1e6cf0671683	NA	41.918
brain	primary_cancer	TCGA-HT-A74J-01A-12R-A32Q-07	Brain Lower Grade Glioma	fec08c47-a556-4bef-a20f-b3985d30a500	NA	68.121
brain	primary_cancer	TCGA-06-2569-01A-01R-1849-01	Glioblastoma multiforme	57e8e300-2cd1-4af1-a84c-02e1d3fc3555	NA	18.795
brain	primary_cancer	TCGA-06-0882-01A-01R-1849-01	Glioblastoma multiforme	25315562-5f8e-46d0-ab77-d1f6ce75270b	NA	43.58
brain	primary_cancer	TCGA-DB-A64V-01A-11R-A29R-07	Brain Lower Grade Glioma	72b6a847-016f-4565-a5aa-e277c5cffb08	NA	42.418
brain	primary_cancer	TCGA-27-1832-01A-01R-1850-01	Glioblastoma multiforme	11a0e909-11e7-40f3-be04-5bd2143ee6ab	NA	29.954
brain	primary_cancer	TCGA-HT-7877-01A-11R-2403-07	Brain Lower Grade Glioma	266003f1-3a9d-413b-9d18-1b2c40c48a22	NA	37.84
brain	primary_cancer	TCGA-HT-7681-01A-11R-2403-07	Brain Lower Grade Glioma	12391798-07e4-44bd-9689-db2f95f6d710	NA	60.906
brain	primary_cancer	TCGA-06-0168-01A-01R-1849-01	Glioblastoma multiforme	db5b5af5-c221-4268-a978-e12c550989e7	NA	54.397
brain	primary_cancer	TCGA-HT-8109-01A-11R-2404-07	Brain Lower Grade Glioma	2242fa55-5ea8-4143-92aa-f5bab77f6cec	NA	48.96
brain	metastasis	TCGA-FG-A4MT-02A-11R-A29R-07	Brain Lower Grade Glioma	9f4e522f-d1c3-4fa9-9ab4-b6886426a77c	NA	43.257
brain	primary_cancer	TCGA-TM-A84S-01A-11R-A36H-07	Brain Lower Grade Glioma	b37064bc-6eec-4387-a09b-8d7b853e0a90	NA	90.149
brain	primary_cancer	TCGA-DU-7309-01A-11R-2090-07	Brain Lower Grade Glioma	ef3a0956-e7bf-4f1b-bc54-7e21fd318bbd	NA	60.776
brain	primary_cancer	TCGA-HW-7490-01A-11R-2027-07	Brain Lower Grade Glioma	cb3b19a0-fb0a-49c8-a4e1-c2e3215a192f	NA	58.393
brain	primary_cancer	TCGA-DU-8168-01A-11R-2256-07	Brain Lower Grade Glioma	dd69f2af-4ec7-4fb5-bc82-cc93686e2790	NA	67.662
brain	primary_cancer	TCGA-14-1829-01A-01R-1850-01	Glioblastoma multiforme	098b8eb6-2e55-4628-8eca-e1068e74d9e6	NA	9.905
brain	metastasis	TCGA-TQ-A7RK-02A-11R-A36H-07	Brain Lower Grade Glioma	707a0918-ae88-4c3c-9a94-e9fad5cdbc7b	NA	58.208
brain	primary_cancer	TCGA-S9-A7J2-01A-11R-A34F-07	Brain Lower Grade Glioma	8b99cc75-d8cc-4d18-9a6b-c66f8bd7ea0d	NA	82.336
brain	primary_cancer	TCGA-DU-6408-01A-11R-1708-07	Brain Lower Grade Glioma	0c562903-7b09-49f2-b59e-fa697d69f810	NA	65.667
brain	primary_cancer	TCGA-FG-8189-01B-11R-A28M-07	Brain Lower Grade Glioma	bd0752a4-59b6-4f0d-b08c-45d12ae97a3e	NA	26.993
brain	primary_cancer	TCGA-TQ-A7RN-01A-11R-A33Z-07	Brain Lower Grade Glioma	e6d2870a-4ba2-4064-a5a9-d701e6b5e3dd	NA	62.843
brain	primary_cancer	TCGA-27-2519-01A-01R-1850-01	Glioblastoma multiforme	6870c515-1f0e-4481-82bf-7cde66292278	NA	30.543
brain	primary_cancer	TCGA-QH-A870-01A-11R-A36H-07	Brain Lower Grade Glioma	2c8a4bf0-f9dd-4fb3-8415-782434a12ceb	NA	108.499
brain	primary_cancer	TCGA-VV-A86M-01A-11R-A36H-07	Brain Lower Grade Glioma	b1a7c6af-dc87-43c9-9394-5907e610446f	NA	42.559
brain	primary_cancer	TCGA-FN-7833-01A-11R-2090-07	Brain Lower Grade Glioma	8ddbc97b-376a-4851-906d-efe41fa45eee	NA	78.415
brain	primary_cancer	TCGA-S9-A7R1-01A-12R-A34R-07	Brain Lower Grade Glioma	e07c8a75-c54b-4b5e-bec3-f1df709c16d8	NA	48.173
brain	primary_cancer	TCGA-DU-7007-01A-11R-2027-07	Brain Lower Grade Glioma	338cef4b-d790-4823-8dad-40bf78c29c68	NA	33.71
brain	primary_cancer	TCGA-DU-7013-01A-11R-2027-07	Brain Lower Grade Glioma	5fd57857-2f5d-4cfd-a365-bf4d5369f926	NA	73.497
brain	primary_cancer	TCGA-DU-6403-01A-11R-1708-07	Brain Lower Grade Glioma	d4cd474d-abe3-423c-9772-a8edce3bb8c7	NA	38.49
brain	primary_cancer	TCGA-P5-A77X-01A-11R-A32Q-07	Brain Lower Grade Glioma	ef9256b0-f4e0-4a1e-9ea2-d4afb75b7ba9	NA	30.995
brain	primary_cancer	TCGA-DU-A7T6-01A-11R-A33Z-07	Brain Lower Grade Glioma	063e82c8-a923-4ca5-94cb-9fce3cccd226	NA	36.859
breast	primary_cancer	TCGA-AN-A03Y-01A-21R-A00Z-07	Breast invasive carcinoma	7509b7dc-18cc-4430-ad93-fa598fc97330	NA	9.658
breast	primary_cancer	TCGA-B6-A0IC-01A-11R-A034-07	Breast invasive carcinoma	718599d7-723a-4121-ac07-51120cde9af1	NA	39.218
breast	primary_cancer	TCGA-E2-A1IE-01A-11R-A13Q-07	Breast invasive carcinoma	ec6f69db-ff0b-491c-8b70-d53d0e7ad65f	NA	22.899
breast	primary_cancer	TCGA-AC-A3OD-01B-06R-A22O-07	Breast invasive carcinoma	89a6d94d-59fc-45aa-859a-3b24e6691fe8	NA	1.44
breast	primary_cancer	TCGA-A7-A4SE-01A-11R-A266-07	Breast invasive carcinoma	6bb217e7-3fd4-477f-87bf-b55e50a33e45	NA	4.395
breast	primary_cancer	TCGA-E2-A1LI-01A-12R-A157-07	Breast invasive carcinoma	fa643dcc-4f4c-44d0-9f4d-199de04f8d2b	NA	2.913
breast	primary_cancer	TCGA-A8-A09B-01A-11R-A00Z-07	Breast invasive carcinoma	df95b9f5-437f-438d-89b4-7c556e79b616	NA	15.013
breast	primary_cancer	TCGA-BH-A0H3-01A-11R-A12P-07	Breast invasive carcinoma	4baa8edc-9ab0-4cd6-b316-dfe1ff7c1f4d	NA	16.058
breast	primary_cancer	TCGA-AR-A2LN-01A-21R-A18M-07	Breast invasive carcinoma	8a23348d-3371-431e-a6c8-b031cde82279	NA	8.604
breast	primary_cancer	TCGA-BH-A18T-01A-11R-A12D-07	Breast invasive carcinoma	733890d7-6557-454e-8697-fe9c619874e3	NA	5.559
breast	primary_cancer	TCGA-A2-A04U-01A-11R-A115-07	Breast invasive carcinoma	4d12d021-3673-4e14-9fd9-033f811f87da	NA	2.718
breast	primary_cancer	TCGA-BH-A1FN-01A-11R-A13Q-07	Breast invasive carcinoma	c870e04b-c3b7-495c-8465-7ef2a00fadc7	NA	16.409
breast	primary_cancer	TCGA-D8-A1X8-01A-11R-A14M-07	Breast invasive carcinoma	cbc8608e-ffe1-41d5-93c5-66dd665c9bf0	NA	19.911
breast	primary_cancer	TCGA-EW-A1PB-01A-11R-A144-07	Breast invasive carcinoma	50674dde-30c1-4530-a164-381d5326e29c	NA	0.899
breast	primary_cancer	TCGA-BH-A42V-01A-11R-A24H-07	Breast invasive carcinoma	2fa59be9-ecde-49b2-b109-7000d5180847	NA	7.191
breast	primary_cancer	TCGA-AO-A0J7-01A-11R-A034-07	Breast invasive carcinoma	542bb107-1b0c-4ace-834d-9e32ed82429c	NA	11.184
breast	primary_cancer	TCGA-E2-A1L7-01A-11R-A144-07	Breast invasive carcinoma	ec38c31b-def8-41cc-8656-57ce98f3faa7	NA	15.04
breast	primary_cancer	TCGA-E9-A1N4-01A-11R-A14M-07	Breast invasive carcinoma	55b3f26e-8f8f-48b8-8c3a-4e648ac7e05a	NA	1.612
breast	primary_cancer	TCGA-D8-A1JJ-01A-31R-A14M-07	Breast invasive carcinoma	091cb252-dd08-4e9c-939c-749f595713f6	NA	6.537
breast	primary_cancer	TCGA-E9-A227-01A-11R-A157-07	Breast invasive carcinoma	2f315234-dee1-4f36-b7dc-72280c219a1c	NA	6.967
breast	primary_cancer	TCGA-PE-A5DD-01A-12R-A27Q-07	Breast invasive carcinoma	38adc5a4-bf82-4a06-a179-e84dd42593da	NA	6.227
breast	primary_cancer	TCGA-A1-A0SG-01A-11R-A144-07	Breast invasive carcinoma	0df6b948-367d-4951-9d98-d3bebabff63e	NA	7.493
breast	primary_cancer	TCGA-EW-A1PH-01A-11R-A14M-07	Breast invasive carcinoma	39413018-090f-46ca-b6df-244124f098c3	NA	2.875
breast	primary_cancer	TCGA-EW-A6SD-01A-12R-A33J-07	Breast invasive carcinoma	54d166b6-fb32-4003-b944-8d0f23cfa125	NA	3.039
breast	primary_cancer	TCGA-D8-A1JN-01A-11R-A13Q-07	Breast invasive carcinoma	874de789-c1c4-4fd3-b45c-e885f62aaeab	NA	2.927
breast	primary_cancer	TCGA-AQ-A04J-01A-02R-A034-07	Breast invasive carcinoma	97168a1f-abf8-414b-af10-b63f5daa7023	NA	7.063
breast	metastasis	TCGA-AC-A6IX-06A-11R-A32P-07	Breast invasive carcinoma	9d5cd723-da40-47ce-a413-20057593905d	NA	7.991
breast	primary_cancer	TCGA-A8-A08X-01A-21R-A00Z-07	Breast invasive carcinoma	354adce5-6ca4-4d6d-a519-4eabc01c6b36	NA	0.844
breast	primary_cancer	TCGA-AQ-A7U7-01A-22R-A352-07	Breast invasive carcinoma	0f3672e4-ab71-4cb6-9d46-3ae57b58e249	NA	12.51
breast	primary_cancer	TCGA-AC-A3W5-01A-11R-A22K-07	Breast invasive carcinoma	3e775d6c-3845-49a7-80e0-82c5c68a473c	NA	4.116
breast	primary_cancer	TCGA-A8-A097-01A-11R-A034-07	Breast invasive carcinoma	1873a785-0f15-40ef-a7c9-1799ab482338	NA	25.953
breast	primary_cancer	TCGA-GM-A2DL-01A-11R-A18M-07	Breast invasive carcinoma	8955404a-c756-4116-9613-dea06077a056	NA	4.538
breast	primary_cancer	TCGA-AO-A0JM-01A-21R-A056-07	Breast invasive carcinoma	7b53ba9f-506e-4af7-9752-ae50e4445880	NA	6.799
breast	primary_cancer	TCGA-AR-A0TP-01A-11R-A084-07	Breast invasive carcinoma	f9739b94-ac64-40d5-bfdd-041a412976c4	NA	7.556
breast	primary_cancer	TCGA-B6-A0IG-01A-11R-A034-07	Breast invasive carcinoma	463d3f12-16bb-456a-8fb1-f200c7996406	NA	8.1
breast	primary_cancer	TCGA-LQ-A4E4-01A-11R-A266-07	Breast invasive carcinoma	5965fc49-0ee5-41d8-b673-9ade5c70db71	NA	12.508
breast	primary_cancer	TCGA-S3-AA14-01A-11R-A41B-07	Breast invasive carcinoma	eb8b259a-b2b3-4fb1-b9d3-b41480642da7	NA	5.548
breast	primary_cancer	TCGA-AN-A0FF-01A-11R-A034-07	Breast invasive carcinoma	7a5bc56e-e787-4798-8c4d-ee792f9e3149	NA	10.497
breast	primary_cancer	TCGA-C8-A131-01A-11R-A115-07	Breast invasive carcinoma	5162ef6d-6978-4ff7-b385-a59325cefe17	NA	5.338
breast	primary_cancer	TCGA-B6-A0I2-01A-11R-A034-07	Breast invasive carcinoma	7175b3eb-5198-4d7f-b205-91ae8df344b4	NA	0.19
breast	primary_cancer	TCGA-OL-A66I-01A-21R-A29R-07	Breast invasive carcinoma	d92ddf45-68b6-42da-9497-8faabcc50be0	NA	1.2
breast	primary_cancer	TCGA-S3-AA11-01A-31R-A41B-07	Breast invasive carcinoma	11785b0e-04c6-4cf5-80c6-2c4ffcb206f6	NA	19.897
breast	primary_cancer	TCGA-B6-A0I6-01A-11R-A034-07	Breast invasive carcinoma	09c248f8-cdd7-4c13-9085-26c56544bcf7	NA	6.785
breast	primary_cancer	TCGA-AN-A049-01A-21R-A00Z-07	Breast invasive carcinoma	53a89c04-16e5-4cc3-838c-6b6d1b8ea0c0	NA	9.531
breast	primary_cancer	TCGA-PL-A8LZ-01A-31R-A36F-07	Breast invasive carcinoma	de01d9b6-e29d-495e-815a-c7d2a7c15af3	NA	2.375
breast	primary_cancer	TCGA-A8-A08A-01A-11R-A32Y-07	Breast invasive carcinoma	bf92b8cc-9a5c-4e96-917c-c264fe588f8d	NA	16.581
breast	primary_cancer	TCGA-B6-A0RQ-01A-11R-A115-07	Breast invasive carcinoma	184fe3c4-58bb-45c5-a9a5-9a8a56985f9f	NA	15.298
breast	primary_cancer	TCGA-BH-A1FD-01A-11R-A13Q-07	Breast invasive carcinoma	744ed141-8809-4bc9-90e6-74098383914e	NA	12.801
breast	primary_cancer	TCGA-E9-A1N5-01A-11R-A14D-07	Breast invasive carcinoma	1adf0e70-b1fb-4862-8a01-6454b09636f4	NA	14.738
breast	primary_cancer	TCGA-BH-A0HQ-01A-11R-A034-07	Breast invasive carcinoma	856452d1-5480-4921-bf5b-4c6f625a99c0	NA	15.071
breast	primary_cancer	TCGA-GM-A3XL-01A-11R-A22U-07	Breast invasive carcinoma	29c98197-249e-45c9-96dc-34dfb4ac1430	NA	3.206
breast	primary_cancer	TCGA-BH-A1F0-01A-11R-A137-07	Breast invasive carcinoma	d31b476c-c047-4e5f-a0cb-eff1065f0121	NA	1.079
breast	primary_cancer	TCGA-D8-A73X-01A-11R-A32P-07	Breast invasive carcinoma	a982e795-5256-439a-ae7b-9c250eefea53	NA	17.189
breast	primary_cancer	TCGA-LL-A50Y-01A-11R-A266-07	Breast invasive carcinoma	02a65cb0-158c-478b-b72e-d6bae04429c7	NA	18.438
breast	primary_cancer	TCGA-OL-A66K-01A-11R-A29R-07	Breast invasive carcinoma	7cd7e1cf-4390-4b0e-884c-fc0a26c7e1bf	NA	9.945
breast	primary_cancer	TCGA-BH-A0BG-01A-11R-A115-07	Breast invasive carcinoma	70b29dd6-1688-4510-94dd-5fcb26a1a908	NA	1.262
breast	primary_cancer	TCGA-AR-A24K-01A-11R-A169-07	Breast invasive carcinoma	e3008c10-aa31-40ef-ad50-77fd8ec7a1a9	NA	5.52
breast	primary_cancer	TCGA-BH-A0BL-01A-11R-A115-07	Breast invasive carcinoma	39ca8590-3733-4b61-9a46-4ec5e6e0501e	NA	9.748
breast	primary_cancer	TCGA-A7-A3J1-01A-11R-A213-07	Breast invasive carcinoma	3b042185-867f-492b-a448-7c51e05f9b42	NA	14.118
breast	primary_cancer	TCGA-A8-A07U-01A-11R-A034-07	Breast invasive carcinoma	77daa4a6-93c2-4455-a173-ead372d92010	NA	0.506
breast	primary_cancer	TCGA-D8-A13Z-01A-11R-A115-07	Breast invasive carcinoma	624ac458-8ff1-441c-a8c5-aaf4a08a4b84	NA	17.259
breast	primary_cancer	TCGA-B6-A2IU-01A-32R-A18M-07	Breast invasive carcinoma	71a6367e-a876-4f1e-b80c-0e2d7d02e7cd	NA	17.032
breast	primary_cancer	TCGA-LL-A6FP-01A-11R-A31O-07	Breast invasive carcinoma	b7cbb41f-b7ba-4bc7-8b6a-ce93317495b1	NA	11.257
breast	primary_cancer	TCGA-EW-A1P4-01A-21R-A144-07	Breast invasive carcinoma	91a5b906-6a04-4f0d-8710-172311e84789	NA	3.739
breast	primary_cancer	TCGA-AN-A0XV-01A-11R-A109-07	Breast invasive carcinoma	7b33b321-fe4b-4296-91bc-53bac35828e5	NA	7.144
breast	primary_cancer	TCGA-E2-A106-01A-11R-A10J-07	Breast invasive carcinoma	cbd64838-97a7-47a9-a4dc-aa9e0d0ab3d2	NA	8.761
breast	primary_cancer	TCGA-A7-A6VY-01A-12R-A33J-07	Breast invasive carcinoma	2fb506f2-4b76-4c20-ae45-8939f2e14753	NA	2.56
breast	primary_cancer	TCGA-BH-A18R-01A-11R-A12D-07	Breast invasive carcinoma	b05828bc-eb75-4220-9972-6c6d62fa5303	NA	5.962
breast	primary_cancer	TCGA-AR-A2LM-01A-11R-A180-07	Breast invasive carcinoma	461cbf67-a11d-4411-95b5-cf83ecf05d02	NA	29.169
breast	primary_cancer	TCGA-AO-A0JD-01A-11R-A056-07	Breast invasive carcinoma	0bef9bfc-43d3-4ac9-a60f-9b65623f7e37	NA	5.886
breast	primary_cancer	TCGA-AR-A24V-01A-21R-A169-07	Breast invasive carcinoma	29b04717-c5f2-4d4c-b006-e5c5f0aade7a	NA	8.509
breast	primary_cancer	TCGA-BH-A1F6-01A-11R-A13Q-07	Breast invasive carcinoma	5f5a884c-ffbd-401a-8689-baded1bdbe50	NA	0.523
breast	primary_cancer	TCGA-BH-A0B6-01A-11R-A19W-07	Breast invasive carcinoma	b455387f-a8b4-43b8-b898-89628723d7da	NA	6.266
breast	primary_cancer	TCGA-E9-A22D-01A-11R-A157-07	Breast invasive carcinoma	1fdac226-ed6b-41a8-9575-67117b4cf035	NA	5.677
breast	primary_cancer	TCGA-B6-A0RM-01A-11R-A084-07	Breast invasive carcinoma	17fdb26d-d808-4b0d-a794-6b664dae8b2b	NA	16.367
breast	primary_cancer	TCGA-E9-A5UP-01A-11R-A28M-07	Breast invasive carcinoma	0a9af348-b2a7-4fad-b939-7eda53e4f5a0	NA	8.628
breast	primary_cancer	TCGA-HN-A2NL-01A-11R-A18M-07	Breast invasive carcinoma	6593576c-a4a8-4284-8591-321f980f2e58	NA	12.814
breast	primary_cancer	TCGA-BH-A0EI-01A-11R-A115-07	Breast invasive carcinoma	c6929312-e22d-4d4e-830d-6f735184d9b2	NA	29.24
breast	primary_cancer	TCGA-BH-A1FU-01A-11R-A14D-07	Breast invasive carcinoma	05a4f4ff-cdfd-4332-8146-066657a4c3cc	NA	10.576
breast	primary_cancer	TCGA-AO-A0J3-01A-11R-A034-07	Breast invasive carcinoma	7455cc98-aceb-4adc-932b-4fddd979c522	NA	23.08
breast	primary_cancer	TCGA-OL-A5D6-01A-21R-A27Q-07	Breast invasive carcinoma	5657c6b6-ba04-4dd8-8623-2a3834820f7d	NA	1.38
breast	primary_cancer	TCGA-D8-A1XV-01A-11R-A14M-07	Breast invasive carcinoma	5a0e92d3-7eb2-4ab2-8ee7-f2f180c6a6e6	NA	6.064
breast	primary_cancer	TCGA-S3-A6ZG-01A-22R-A32P-07	Breast invasive carcinoma	0967df37-66ae-4ab3-a1fd-e196d4bc9995	NA	27.331
breast	primary_cancer	TCGA-A2-A0YL-01A-21R-A109-07	Breast invasive carcinoma	32cfb4f4-1de9-4937-8cfa-dc6c37081583	NA	22.582
breast	primary_cancer	TCGA-AO-A0J5-01A-11R-A034-07	Breast invasive carcinoma	5d033f3f-b22f-4d10-b39b-0bae2b4db5be	NA	4.204
breast	primary_cancer	TCGA-W8-A86G-01A-21R-A36F-07	Breast invasive carcinoma	37106eb9-90ee-4468-aded-0709fa4bba47	NA	9.914
breast	primary_cancer	TCGA-E2-A1B6-01A-31R-A12P-07	Breast invasive carcinoma	eb398b00-8669-4c22-8285-03cdf76436f3	NA	1.327
breast	primary_cancer	TCGA-A8-A08T-01A-21R-A00Z-07	Breast invasive carcinoma	ed6ebb15-1401-49e0-be9a-e1391e84b374	NA	7.771
breast	primary_cancer	TCGA-A2-A0T6-01A-11R-A084-07	Breast invasive carcinoma	e3639f71-cfe7-46c7-8390-73f8043ac6b0	NA	15.57
breast	primary_cancer	TCGA-E2-A1LA-01A-11R-A144-07	Breast invasive carcinoma	9a56eb8b-99fa-4671-99dc-29776dca4cd6	NA	6.895
breast	primary_cancer	TCGA-AR-A5QQ-01A-11R-A28M-07	Breast invasive carcinoma	16f90247-c9a5-40d5-a3a1-08bba2d1d266	NA	0.806
breast	primary_cancer	TCGA-BH-AB28-01A-31R-A41B-07	Breast invasive carcinoma	3cf4fddd-7fb5-4bb6-bca8-412019df4e2d	NA	15.772
breast	primary_cancer	TCGA-E9-A54X-01A-11R-A266-07	Breast invasive carcinoma	fc36b662-fabd-4caa-81f7-00fe0a3164a6	NA	8.759
breast	primary_cancer	TCGA-A2-A04Q-01A-21R-A034-07	Breast invasive carcinoma	d71e12c1-d92c-4cb6-8244-d100b2ef1c43	NA	2.264
breast	primary_cancer	TCGA-EW-A1OY-01A-11R-A144-07	Breast invasive carcinoma	0c3f0857-32d7-4ef6-b303-6e452ee04516	NA	10.424
breast	primary_cancer	TCGA-A2-A04P-01A-31R-A034-07	Breast invasive carcinoma	357ba9f6-716c-4ef0-8ac8-41977397dbf5	NA	0.522
breast	primary_cancer	TCGA-Z7-A8R6-01A-11R-A41B-07	Breast invasive carcinoma	d8a45ca6-8f09-4949-8d55-13259b4826d2	NA	11.327
breast	primary_cancer	TCGA-AO-A1KP-01A-11R-A13Q-07	Breast invasive carcinoma	773a2357-99b8-40df-b657-f237d9735db9	NA	24.176
breast	primary_cancer	TCGA-AC-A2FM-01A-11R-A19W-07	Breast invasive carcinoma	c1280be2-b926-4632-975a-fe52bb04c65d	NA	4.621
breast	primary_cancer	TCGA-A2-A0YM-01A-11R-A109-07	Breast invasive carcinoma	1e59ea3f-36fa-4860-8c28-87b4b09075ec	NA	7.937
breast	primary_cancer	TCGA-AC-A3YI-01A-21R-A239-07	Breast invasive carcinoma	20e8a6eb-4785-42f2-bb0c-bbdf5beb6c26	NA	3.713
breast	primary_cancer	TCGA-C8-A132-01A-31R-A115-07	Breast invasive carcinoma	143e8620-56cc-4b65-a2aa-d793543f6854	NA	6.018
breast	primary_cancer	TCGA-AO-A0J8-01A-21R-A034-07	Breast invasive carcinoma	70109263-1d2b-4abe-a582-2b28e87cde67	NA	18.973
breast	primary_cancer	TCGA-BH-A0HL-01A-11R-A10U-07	Breast invasive carcinoma	1ee60bda-48df-4288-90cb-480fbfbc5d50	NA	44.783
breast	primary_cancer	TCGA-A8-A092-01A-11R-A00Z-07	Breast invasive carcinoma	98b2b18a-004d-459c-8aba-499d06897910	NA	18.923
breast	primary_cancer	TCGA-A8-A09R-01A-11R-A00Z-07	Breast invasive carcinoma	f4fcb7e1-20b8-4b66-86a2-1be81b06785e	NA	28.174
breast	primary_cancer	TCGA-A8-A084-01A-21R-A00Z-07	Breast invasive carcinoma	2f2fe990-f8f6-4904-b3d5-083e17a7a29d	NA	13.256
breast	primary_cancer	TCGA-D8-A27V-01A-12R-A17B-07	Breast invasive carcinoma	a4c963fd-c8a6-4dcb-8b6e-159591e61d49	NA	9.237
breast	primary_cancer	TCGA-C8-A8HQ-01A-11R-A36F-07	Breast invasive carcinoma	7f8c9d62-0803-44d6-9375-b4e71612a0b1	NA	6.687
breast	primary_cancer	TCGA-AN-A03X-01A-21R-A00Z-07	Breast invasive carcinoma	ae97b841-ddef-4bed-81ac-0b91627c4ef3	NA	14.915
breast	primary_cancer	TCGA-AR-A24T-01A-11R-A169-07	Breast invasive carcinoma	d2e1fdf7-1ac9-49e9-a611-b15c90772bf6	NA	41.666
breast	primary_cancer	TCGA-JL-A3YX-01A-11R-A22U-07	Breast invasive carcinoma	b2b92b23-3f2a-4305-8c6c-27c91c67c072	NA	4.605
breast	primary_cancer	TCGA-BH-A0B4-01A-11R-A00Z-07	Breast invasive carcinoma	8af4a557-aebf-44ac-8ed5-b8b7b10ed24e	NA	7.634
breast	primary_cancer	TCGA-S3-AA12-01A-11R-A41B-07	Breast invasive carcinoma	a18a4d65-5383-4c29-ac03-959f8b9cb37d	NA	28.174
breast	primary_cancer	TCGA-A7-A26F-01A-21R-A169-07	Breast invasive carcinoma	2a4747b5-1eeb-45b1-9e92-0e0e3d7a9c1b	NA	0.048
breast	primary_cancer	TCGA-BH-A0BZ-01A-31R-A12P-07	Breast invasive carcinoma	317ffb84-f4a8-435b-907b-b05587d6515e	NA	2.575
breast	primary_cancer	TCGA-E9-A1NA-01A-11R-A144-07	Breast invasive carcinoma	7edc6614-6c8b-43ec-87dd-7720961bd174	NA	0.71
breast	primary_cancer	TCGA-EW-A6SC-01A-12R-A32P-07	Breast invasive carcinoma	3b7ae466-954f-42aa-8e01-9908ef1c8123	NA	7.713
breast	primary_cancer	TCGA-E9-A1R5-01A-11R-A14M-07	Breast invasive carcinoma	7b06a333-ba77-41dd-bfd1-4824fe43d06f	NA	31.963
breast	primary_cancer	TCGA-EW-A3U0-01A-11R-A22K-07	Breast invasive carcinoma	4763b4dd-1eef-4503-9381-4baa57cc690f	NA	5.299
breast	primary_cancer	TCGA-E9-A295-01A-11R-A16F-07	Breast invasive carcinoma	28ad8481-78a8-4103-b501-5cfd23ae3e81	NA	21.56
breast	primary_cancer	TCGA-A8-A08I-01A-11R-A00Z-07	Breast invasive carcinoma	3e853cb1-4747-4f98-be64-d5de7fba801e	NA	19.91
breast	primary_cancer	TCGA-AR-A1AI-01A-11R-A12P-07	Breast invasive carcinoma	52ff562f-6a13-435a-acab-16a064633b1d	NA	2.783
breast	primary_cancer	TCGA-OL-A5RV-01A-12R-A28M-07	Breast invasive carcinoma	2dca31d2-af60-4529-afac-e8838a7ee67c	NA	13.843
breast	primary_cancer	TCGA-A7-A13H-01A-11R-A22K-07	Breast invasive carcinoma	4f0fdfc6-6578-4d9a-92ae-6d82291a3785	NA	17.024
breast	primary_cancer	TCGA-AR-A1AO-01A-11R-A12P-07	Breast invasive carcinoma	56183330-0700-46d7-b45f-6d915ae587fa	NA	4.573
breast	primary_cancer	TCGA-E2-A1BC-01A-11R-A12P-07	Breast invasive carcinoma	a2cf164c-5b26-43eb-9de9-d1d457a5de06	NA	17.027
breast	primary_cancer	TCGA-AC-A8OS-01A-12R-A41B-07	Breast invasive carcinoma	c119a170-e1ba-4965-a9c6-5c0b41ceefba	NA	5.092
breast	primary_cancer	TCGA-A7-A26H-01A-11R-A169-07	Breast invasive carcinoma	d1810175-47a5-4409-b1b8-f5ba78ed1c30	NA	19.715
breast	primary_cancer	TCGA-AR-A2LQ-01A-22R-A18M-07	Breast invasive carcinoma	7a72bd47-7504-4a59-ae95-096c32f70965	NA	8.28
breast	primary_cancer	TCGA-BH-A0BO-01A-23R-A12D-07	Breast invasive carcinoma	682a9c8d-8174-4435-9ec8-cb2d58bbe6d5	NA	6.778
breast	primary_cancer	TCGA-D8-A1JM-01A-11R-A13Q-07	Breast invasive carcinoma	ab3e7f05-9fb2-4c19-a6a9-3ffe1e4c1525	NA	1.991
breast	primary_cancer	TCGA-B6-A0WT-01A-11R-A109-07	Breast invasive carcinoma	0507f62d-e776-4efb-bd51-dba9d74090bd	NA	14.006
breast	primary_cancer	TCGA-LL-A6FR-01A-12R-A31O-07	Breast invasive carcinoma	1cefed42-1e09-4bff-b323-55faeaee18e1	NA	1.067
breast	primary_cancer	TCGA-A2-A1G1-01A-21R-A13Q-07	Breast invasive carcinoma	122a1ed2-9757-4cac-9656-149da6d872f4	NA	1.384
breast	primary_cancer	TCGA-EW-A1P6-01A-11R-A144-07	Breast invasive carcinoma	9dddaf60-64ed-4d41-a546-79e86db1101e	NA	8.36
breast	primary_cancer	TCGA-A2-A0CY-01A-12R-A034-07	Breast invasive carcinoma	c7d2b685-5f11-4879-82d5-e983b5dbb07d	NA	9.547
breast	primary_cancer	TCGA-D8-A27N-01A-11R-A16F-07	Breast invasive carcinoma	50808f98-d10b-4190-aff7-428f56abb0f9	NA	1.434
breast	primary_cancer	TCGA-AO-A03M-01B-11R-A10J-07	Breast invasive carcinoma	f65936bc-02d6-4954-9068-0fb7c930d685	NA	15.504
breast	primary_cancer	TCGA-C8-A1HG-01A-11R-A137-07	Breast invasive carcinoma	094076d0-97e4-460d-b48c-7ee2371db99d	NA	7.601
breast	primary_cancer	TCGA-A2-A0EX-01A-21R-A034-07	Breast invasive carcinoma	6fc8b7da-3de6-4111-b685-bb03c032466a	NA	7.224
breast	primary_cancer	TCGA-S3-A6ZF-01A-32R-A32P-07	Breast invasive carcinoma	4d464cde-4885-4b17-9e02-23be26be0540	NA	12.73
breast	primary_cancer	TCGA-BH-A0HI-01A-11R-A084-07	Breast invasive carcinoma	682942cb-589f-4348-abc2-3c7cc76fb34d	NA	13.625
breast	primary_cancer	TCGA-AN-A0XP-01A-11R-A109-07	Breast invasive carcinoma	14fb9342-c11d-460d-af84-f31f7753beeb	NA	10.466
breast	primary_cancer	TCGA-A7-A0D9-01A-31R-A056-07	Breast invasive carcinoma	755912f4-6725-4b7b-84b1-518c7529a176	NA	7.326
breast	primary_cancer	TCGA-AN-A0FK-01A-11R-A034-07	Breast invasive carcinoma	570ee0fd-7003-45ce-9c42-8f6145604186	NA	1.214
breast	primary_cancer	TCGA-D8-A27W-01A-11R-A16F-07	Breast invasive carcinoma	65843fe1-4da2-4165-8926-a0d6f878a7f8	NA	9.633
breast	primary_cancer	TCGA-AC-A23H-01A-11R-A157-07	Breast invasive carcinoma	28199d71-9111-4763-a07f-66734769bb98	NA	0.33
breast	primary_cancer	TCGA-LL-A5YO-01A-21R-A28M-07	Breast invasive carcinoma	4b5b44ea-8589-4aea-a69f-b5d5041b1acd	NA	1.961
breast	primary_cancer	TCGA-AC-A62V-01A-11R-A31O-07	Breast invasive carcinoma	7a356940-c460-4714-a949-42afe6ea5d86	NA	3.823
breast	primary_cancer	TCGA-A2-A0EW-01A-21R-A115-07	Breast invasive carcinoma	5bf6cf0d-8d00-4a50-b239-4b9d8f3e51b9	NA	14.659
breast	primary_cancer	TCGA-D8-A146-01A-31R-A115-07	Breast invasive carcinoma	69f535c7-8f70-4efc-98bc-7f99924d7db1	NA	10.504
breast	primary_cancer	TCGA-A2-A1FW-01A-11R-A13Q-07	Breast invasive carcinoma	2f1af8cf-ded3-45b6-88cd-2c154c66ab8c	NA	16.376
breast	primary_cancer	TCGA-GM-A2DK-01A-21R-A180-07	Breast invasive carcinoma	52df7d5d-7236-464f-9394-7c20f8726280	NA	3.511
breast	primary_cancer	TCGA-E2-A109-01A-11R-A10J-07	Breast invasive carcinoma	d6aae541-9dec-4055-bfd6-51ebbdcbf7a2	NA	8.198
breast	primary_cancer	TCGA-BH-A18I-01A-11R-A12D-07	Breast invasive carcinoma	844b3442-a740-4cb4-a1fb-b481c552cc88	NA	8.599
breast	primary_cancer	TCGA-BH-A1EU-01A-11R-A137-07	Breast invasive carcinoma	bfeed1cc-e0f8-493f-a950-829ecb3acccc	NA	21.768
breast	primary_cancer	TCGA-E2-A15O-01A-11R-A115-07	Breast invasive carcinoma	4a28ecf3-c70e-42d0-918b-866d11804c13	NA	14.509
breast	primary_cancer	TCGA-BH-A0DQ-01A-11R-A084-07	Breast invasive carcinoma	6022db68-1e06-4974-b657-cd65aed560c4	NA	10.863
breast	primary_cancer	TCGA-A8-A06Q-01A-11R-A034-07	Breast invasive carcinoma	0e2a3a2c-173a-43b8-bd7d-0c09dfa8a2ae	NA	7.216
breast	primary_cancer	TCGA-AO-A0JJ-01A-11R-A056-07	Breast invasive carcinoma	b5eeba4f-8e46-4084-9054-961ea524cf72	NA	8.463
breast	primary_cancer	TCGA-A8-A07R-01A-21R-A034-07	Breast invasive carcinoma	ce045098-cbfb-4c73-9bbe-6a1d677ae0b0	NA	3.938
breast	primary_cancer	TCGA-E2-A107-01A-11R-A10J-07	Breast invasive carcinoma	254c611f-7808-4745-9155-f2d578b29df2	NA	12.42
breast	primary_cancer	TCGA-A8-A0A4-01A-11R-A00Z-07	Breast invasive carcinoma	d9d0e575-bca2-45e6-9df3-fb6fee59ccd9	NA	25.369
breast	primary_cancer	TCGA-A7-A2KD-01A-31R-A21T-07	Breast invasive carcinoma	5e04619f-0fa5-45fa-a30b-31b062600047	NA	10.846
breast	primary_cancer	TCGA-A7-A4SB-01A-21R-A266-07	Breast invasive carcinoma	352dc94a-fc74-4292-890c-4ed9c22dcfbc	NA	3.056
breast	primary_cancer	TCGA-D8-A4Z1-01A-21R-A266-07	Breast invasive carcinoma	e6dbaf07-3551-4c73-a2f2-f1bea4fa8e72	NA	13.614
breast	primary_cancer	TCGA-A7-A0DB-01A-11R-A277-07	Breast invasive carcinoma	b629190c-9d4b-4cb4-8b3d-c0137774cc72	NA	0.742
breast	primary_cancer	TCGA-A7-A13D-01A-13R-A12P-07	Breast invasive carcinoma	3af60b03-66c3-48a1-a42b-1e05fdb529c4	NA	2.831
breast	primary_cancer	TCGA-A1-A0SF-01A-11R-A144-07	Breast invasive carcinoma	28089e15-5e2c-4e83-ba6c-62b3cb40e431	NA	15.54
breast	primary_cancer	TCGA-A2-A0SU-01A-11R-A084-07	Breast invasive carcinoma	05aa0960-505b-4b04-be9f-7b54940f5b27	NA	15.436
breast	primary_cancer	TCGA-BH-A0BV-01A-11R-A00Z-07	Breast invasive carcinoma	6dc89d5b-7613-4a0f-bbdc-ba13f51d12cc	NA	15.13
breast	primary_cancer	TCGA-AR-A2LO-01A-31R-A18M-07	Breast invasive carcinoma	3e71718b-3ab9-4b0d-a92b-52c46e6f1670	NA	16.707
breast	primary_cancer	TCGA-AO-A12F-01A-11R-A115-07	Breast invasive carcinoma	05610046-ec77-4592-892a-464a81d55c45	NA	5.006
breast	primary_cancer	TCGA-E2-A1IH-01A-11R-A13Q-07	Breast invasive carcinoma	2d06908f-3332-4b77-b88c-145dc5c4828f	NA	10.81
breast	primary_cancer	TCGA-BH-A0DO-01B-11R-A12D-07	Breast invasive carcinoma	46892fa4-f179-4991-99da-629d8cf936f6	NA	12.917
breast	primary_cancer	TCGA-BH-A0HF-01A-11R-A056-07	Breast invasive carcinoma	5b92fd62-9fec-4b18-b7c3-50c88fa0d464	NA	10.453
breast	primary_cancer	TCGA-E2-A15S-01A-11R-A115-07	Breast invasive carcinoma	754fd66b-f39a-4308-a57c-05de251f9014	NA	37.13
breast	primary_cancer	TCGA-BH-A0HB-01A-11R-A056-07	Breast invasive carcinoma	67b214bc-ac5f-4993-9907-fe0e0398d4ed	NA	7.864
breast	primary_cancer	TCGA-B6-A0RH-01A-21R-A115-07	Breast invasive carcinoma	d40f62c9-c134-4477-98d7-11d343b5e867	NA	5.799
breast	primary_cancer	TCGA-A2-A0T0-01A-22R-A084-07	Breast invasive carcinoma	7e073ecd-452a-4cba-9dfd-8601f3245721	NA	1.27
breast	primary_cancer	TCGA-LL-A8F5-01A-11R-A36F-07	Breast invasive carcinoma	3cc7e12e-2bc8-494c-b74a-de071d711410	NA	0.668
breast	primary_cancer	TCGA-AO-A0J2-01A-11R-A034-07	Breast invasive carcinoma	81689324-2986-49f6-bef6-f5a525ca36c2	NA	7.359
breast	primary_cancer	TCGA-BH-A0BR-01A-21R-A115-07	Breast invasive carcinoma	0ef20000-2c8e-47bb-86e5-ffa2814099a7	NA	6.075
breast	primary_cancer	TCGA-E9-A1RC-01A-11R-A157-07	Breast invasive carcinoma	00168e86-d23a-48ae-8c60-36d970051907	NA	23.007
breast	primary_cancer	TCGA-B6-A0IM-01A-11R-A034-07	Breast invasive carcinoma	53f4d557-cad7-4367-9546-c10752cc6189	NA	14.034
breast	primary_cancer	TCGA-AR-A0TU-01A-31R-A109-07	Breast invasive carcinoma	2877059f-b560-413b-b8be-40d9fde8fbcf	NA	5.45
breast	primary_cancer	TCGA-E9-A3QA-01A-61R-A22K-07	Breast invasive carcinoma	8a7e272c-39f2-42e6-b1d5-7225cf12fceb	NA	0.784
breast	primary_cancer	TCGA-OL-A5RZ-01A-11R-A28M-07	Breast invasive carcinoma	fc8c0c74-cd1b-4bc7-ab1d-568d302c5719	NA	6.394
breast	primary_cancer	TCGA-BH-A28O-01A-11R-A22K-07	Breast invasive carcinoma	7fdcbf9d-e485-4b2b-8b9e-dba41ceed97b	NA	11.095
breast	primary_cancer	TCGA-E2-A56Z-01A-12R-A29R-07	Breast invasive carcinoma	96af7552-6f51-4abe-8394-b9e966a70228	NA	9.613
breast	primary_cancer	TCGA-B6-A0IA-01A-11R-A034-07	Breast invasive carcinoma	80cfaf9d-f0aa-4a35-918a-2eaad05b3a5a	NA	4.81
breast	primary_cancer	TCGA-AN-A0G0-01A-11R-A034-07	Breast invasive carcinoma	c09e8a88-5a82-4fd6-8d03-ef3ecb988003	NA	2.447
breast	primary_cancer	TCGA-E2-A1LB-01A-11R-A144-07	Breast invasive carcinoma	acf1ec71-46a5-4e7b-84b1-55203bca29d8	NA	0.596
breast	primary_cancer	TCGA-E9-A243-01A-21R-A169-07	Breast invasive carcinoma	619ffb2b-a591-4f3b-aa48-b0c44f4ee36a	NA	1.592
breast	primary_cancer	TCGA-A2-A259-01A-11R-A16F-07	Breast invasive carcinoma	7157ccb4-b4f6-41ba-9f9c-da862b749a57	NA	6.522
breast	primary_cancer	TCGA-D8-A1JA-01A-11R-A13Q-07	Breast invasive carcinoma	ae81378c-ada3-43cb-9855-941467fd856c	NA	4.707
breast	metastasis	TCGA-E2-A15A-06A-11R-A12D-07	Breast invasive carcinoma	e55bc0c9-ee0f-4efb-8024-3baed3c24080	NA	5.576
breast	primary_cancer	TCGA-E2-A155-01A-11R-A12D-07	Breast invasive carcinoma	6a345a9e-8173-4c9e-972d-df0b154c97b0	NA	6.083
breast	primary_cancer	TCGA-A8-A096-01A-11R-A00Z-07	Breast invasive carcinoma	7bf79330-52fa-4111-88fe-b3ea62bcc63a	NA	20.69
breast	primary_cancer	TCGA-EW-A6SB-01A-12R-A32P-07	Breast invasive carcinoma	5cb6b038-fe0b-48db-af0b-2a25beb8d79b	NA	0.576
breast	primary_cancer	TCGA-LL-A5YP-01A-21R-A28M-07	Breast invasive carcinoma	5cc1fd95-8c43-4d40-9e50-fe9f65ee9f1c	NA	2.997
breast	primary_cancer	TCGA-A8-A07E-01A-11R-A034-07	Breast invasive carcinoma	3510559d-33b7-423a-88c9-d8c42270d546	NA	6.153
breast	primary_cancer	TCGA-BH-A0DP-01A-21R-A056-07	Breast invasive carcinoma	72967b75-a711-425a-819d-dd673c5edc44	NA	23.239
breast	primary_cancer	TCGA-A2-A4RX-01A-11R-A266-07	Breast invasive carcinoma	cbef9672-38ba-4873-b232-9a656b7428ce	NA	6.319
breast	primary_cancer	TCGA-A2-A0EO-01A-11R-A034-07	Breast invasive carcinoma	cdeceaf0-beb6-4374-8aea-83bd35318892	NA	8.555
breast	primary_cancer	TCGA-A2-A0CX-01A-21R-A00Z-07	Breast invasive carcinoma	b1ecc303-eb55-436f-9629-cdac63bde297	NA	4.312
breast	primary_cancer	TCGA-AN-A0AM-01A-11R-A034-07	Breast invasive carcinoma	6050d8b9-2d10-4a03-ae57-979cba25bb70	NA	4.493
breast	primary_cancer	TCGA-A2-A3XX-01A-21R-A239-07	Breast invasive carcinoma	043d5dcd-1524-402b-939c-984a1dc916a0	NA	3.476
breast	primary_cancer	TCGA-A2-A25D-01A-12R-A16F-07	Breast invasive carcinoma	d6b5cec3-edeb-46c5-839b-e62a1e850e0e	NA	4.676
breast	primary_cancer	TCGA-E9-A1RI-01A-11R-A169-07	Breast invasive carcinoma	1c77a00e-8cea-48ae-b9b5-193cdecf3604	NA	15.619
breast	primary_cancer	TCGA-D8-A1X6-01A-11R-A14M-07	Breast invasive carcinoma	ac361cbe-2302-4115-8c0f-40845c0ccec9	NA	6.82
breast	primary_cancer	TCGA-AR-A24U-01A-11R-A169-07	Breast invasive carcinoma	296c69de-2b77-4b3a-a228-9552a8a9836e	NA	0.73
breast	primary_cancer	TCGA-B6-A0WV-01A-11R-A109-07	Breast invasive carcinoma	87bdfb78-8690-4569-ba85-592cd2390c24	NA	20.295
breast	primary_cancer	TCGA-D8-A147-01A-11R-A115-07	Breast invasive carcinoma	4d28bcbc-dbdd-46f8-9329-49f359480a97	NA	14.372
breast	primary_cancer	TCGA-BH-A18G-01A-11R-A12D-07	Breast invasive carcinoma	a8a7a335-8e21-4f24-b48b-8764caa21329	NA	0.662
breast	primary_cancer	TCGA-BH-A0C0-01A-21R-A056-07	Breast invasive carcinoma	f8ac9655-03ed-4e14-a4d3-88f63ef6bf7c	NA	8.1
breast	primary_cancer	TCGA-AR-A0TZ-01A-12R-A084-07	Breast invasive carcinoma	1d6480da-a470-4726-8bc4-57fa30799a15	NA	12.46
breast	primary_cancer	TCGA-LD-A7W6-01A-81R-A352-07	Breast invasive carcinoma	da8e08c7-6006-4e66-ae0f-7047177ca02a	NA	16.409
breast	primary_cancer	TCGA-B6-A0I1-01A-11R-A21T-07	Breast invasive carcinoma	785856fc-d042-4b7f-a137-95b17c59b876	NA	2.369
breast	primary_cancer	TCGA-A8-A07W-01A-11R-A00Z-07	Breast invasive carcinoma	03403807-a06f-4d79-ac2d-2d494d4fabee	NA	7.285
breast	primary_cancer	TCGA-BH-A0BT-01A-11R-A12P-07	Breast invasive carcinoma	fe8764cf-04ee-480d-96ce-09d0d388f4f6	NA	27.698
breast	primary_cancer	TCGA-GM-A3NW-01A-21R-A22K-07	Breast invasive carcinoma	e996b750-d0d3-43c8-860a-17da2f607b15	NA	10.502
breast	primary_cancer	TCGA-D8-A27H-01A-11R-A16F-07	Breast invasive carcinoma	123725b8-4f66-4b97-9726-e0c70300d38e	NA	3.8
breast	primary_cancer	TCGA-A8-A091-01A-11R-A00Z-07	Breast invasive carcinoma	e43cb8f2-6541-4d55-b11c-8288dcf3b78f	NA	25.119
breast	primary_cancer	TCGA-B6-A0X0-01A-21R-A115-07	Breast invasive carcinoma	222a566c-2bad-4b47-97dc-ca1f60a9a981	NA	9.942
breast	primary_cancer	TCGA-A2-A0YH-01A-11R-A109-07	Breast invasive carcinoma	5275bc42-18a3-43d1-9dee-dfb80c39ba20	NA	14.738
breast	primary_cancer	TCGA-OL-A66H-01A-11R-A29R-07	Breast invasive carcinoma	428ca7a1-6f08-4426-8f2d-28939166df70	NA	3.246
breast	primary_cancer	TCGA-BH-A1FL-01A-11R-A13Q-07	Breast invasive carcinoma	0858a026-142c-4428-b05d-fdc22080afd3	NA	26.388
breast	primary_cancer	TCGA-B6-A0RG-01A-11R-A056-07	Breast invasive carcinoma	006e88ce-ad31-45bf-8da5-802f0e387b3a	NA	8.377
breast	primary_cancer	TCGA-BH-A8FY-01A-11R-A36F-07	Breast invasive carcinoma	f037b9d3-819b-429d-8e2d-fa8b27008e70	NA	15.829
breast	primary_cancer	TCGA-E9-A1NG-01A-21R-A14M-07	Breast invasive carcinoma	91918c5e-3c5c-4674-9a7f-1e93d9cf9949	NA	8.226
breast	primary_cancer	TCGA-E2-A1IO-01A-11R-A144-07	Breast invasive carcinoma	72611671-51cc-4662-b992-6701eb1df987	NA	28.823
breast	primary_cancer	TCGA-BH-A1FM-01A-11R-A13Q-07	Breast invasive carcinoma	99157b66-ae2a-4ba2-8b28-5653803063a9	NA	7.675
breast	primary_cancer	TCGA-E9-A1R4-01A-21R-A14D-07	Breast invasive carcinoma	11353ea3-2ff0-4658-b528-6aa922dbb665	NA	12.481
breast	primary_cancer	TCGA-PL-A8LV-01A-21R-A41B-07	Breast invasive carcinoma	34f3d207-0bfe-4699-b01b-d145942ba488	NA	0.664
breast	primary_cancer	TCGA-E9-A3X8-01A-31R-A22U-07	Breast invasive carcinoma	b2d76401-5eae-4aa9-9c5c-3d6ad41f50d9	NA	2.729
breast	primary_cancer	TCGA-A7-A13D-01B-04R-A277-07	Breast invasive carcinoma	3a13becc-9a26-496c-b028-5a72315d2cfe	NA	0.719
breast	primary_cancer	TCGA-A8-A079-01A-21R-A00Z-07	Breast invasive carcinoma	6fcf4a82-7687-4a9b-bae9-9dabff66aca8	NA	16.302
breast	primary_cancer	TCGA-A7-A0CG-01A-12R-A056-07	Breast invasive carcinoma	2b0e2135-a1e4-4785-8b9f-b4cf7b36d938	NA	6.787
breast	primary_cancer	TCGA-AO-A1KR-01A-12R-A144-07	Breast invasive carcinoma	6d22f538-114f-48b6-94ba-fb60151ed567	NA	1.716
breast	primary_cancer	TCGA-A2-A0ST-01A-12R-A084-07	Breast invasive carcinoma	920e47c0-1b19-46e6-b1db-b5fd95e44df0	NA	2.169
breast	primary_cancer	TCGA-AR-A1AP-01A-11R-A12P-07	Breast invasive carcinoma	8b0f1897-20d8-492d-9ea9-22f771bbae9d	NA	6.379
breast	primary_cancer	TCGA-S3-AA0Z-01A-11R-A41B-07	Breast invasive carcinoma	cfe44709-9e63-4dd4-9778-80176be7fbd9	NA	3.1
breast	primary_cancer	TCGA-C8-A1HM-01A-12R-A137-07	Breast invasive carcinoma	eb908a6f-d6f2-40ef-90da-97438cd2281e	NA	8.422
breast	primary_cancer	TCGA-D8-A13Y-01A-11R-A115-07	Breast invasive carcinoma	9a92e20a-2a43-4917-981d-c93179770050	NA	22.102
breast	primary_cancer	TCGA-E2-A14X-01A-11R-A115-07	Breast invasive carcinoma	d9f827bb-2498-49b0-aa85-71cb554eb926	NA	1.182
breast	primary_cancer	TCGA-BH-A18Q-01A-12R-A12D-07	Breast invasive carcinoma	2c75afc3-11b5-444d-b6e0-61d76b299f40	NA	4.453
breast	primary_cancer	TCGA-3C-AALJ-01A-31R-A41B-07	Breast invasive carcinoma	c924c2a8-ab41-4499-bb30-79705cc17d45	NA	15.127
breast	primary_cancer	TCGA-E9-A1R2-01A-11R-A14D-07	Breast invasive carcinoma	e24bfd9d-87b2-44a7-bddc-7b7f60461252	NA	15.796
breast	primary_cancer	TCGA-4H-AAAK-01A-12R-A41B-07	Breast invasive carcinoma	2ea9e472-a408-4ae0-975d-50a566f22b2a	NA	12.747
breast	primary_cancer	TCGA-A2-A0YD-01A-11R-A109-07	Breast invasive carcinoma	c1190b96-b6cf-4cd5-8c4e-bc57d964a557	NA	12.512
breast	primary_cancer	TCGA-A8-A0A1-01A-11R-A00Z-07	Breast invasive carcinoma	8522865b-457c-4199-a870-bf8353f2b0a5	NA	10.803
breast	primary_cancer	TCGA-A2-A0EU-01A-22R-A056-07	Breast invasive carcinoma	70633069-e9df-4fce-84df-6849f4b2693c	NA	7.399
breast	primary_cancer	TCGA-BH-A0WA-01A-11R-A109-07	Breast invasive carcinoma	519e1ea1-6658-4978-9f3d-313d7cc1e0c1	NA	5.603
breast	primary_cancer	TCGA-E2-A1L9-01A-11R-A13Q-07	Breast invasive carcinoma	05329e4e-6623-4044-9abf-46f3ed4ccfd8	NA	5.963
breast	primary_cancer	TCGA-AR-A24W-01A-11R-A169-07	Breast invasive carcinoma	a2f3fd7f-9a5d-44aa-8810-4978abad6e12	NA	7.212
breast	primary_cancer	TCGA-A7-A4SA-01A-11R-A266-07	Breast invasive carcinoma	781945fb-6d9e-4b45-8082-57675f21dc4a	NA	12.693
breast	primary_cancer	TCGA-AR-A0U0-01A-11R-A109-07	Breast invasive carcinoma	dea20128-b180-4da1-9da5-0f00bea3b1ab	NA	0.208
breast	primary_cancer	TCGA-B6-A409-01A-11R-A24H-07	Breast invasive carcinoma	4d9bb08c-d954-4e14-aff2-3bec55cdf1c1	NA	1.474
breast	primary_cancer	TCGA-OL-A66P-01A-11R-A31O-07	Breast invasive carcinoma	bbd01868-6fc1-42e7-b375-f0ac1a54a43c	NA	0.471
breast	primary_cancer	TCGA-A7-A4SF-01A-11R-A266-07	Breast invasive carcinoma	f8b3fd9c-ba8c-49bf-aeb7-4e7dfedbb9a8	NA	22.254
breast	primary_cancer	TCGA-BH-A1FB-01A-11R-A13Q-07	Breast invasive carcinoma	5b262ec0-72f2-4c54-820e-a39afad67212	NA	9.133
breast	primary_cancer	TCGA-GM-A3NY-01A-11R-A21T-07	Breast invasive carcinoma	85c4a097-4567-4bdf-879c-96c9a4f48052	NA	3.772
breast	primary_cancer	TCGA-A8-A085-01A-11R-A00Z-07	Breast invasive carcinoma	4be8001c-c6a2-420c-8761-93469a6a7904	NA	5.925
breast	primary_cancer	TCGA-D8-A1J9-01A-11R-A13Q-07	Breast invasive carcinoma	ff7159e7-e9f2-4cc8-ab89-f4167d19672c	NA	3.989
breast	primary_cancer	TCGA-BH-A1F5-01A-12R-A13Q-07	Breast invasive carcinoma	07c52f68-8ece-4702-8573-9b21f32df787	NA	13.42
breast	primary_cancer	TCGA-A2-A0YG-01A-21R-A109-07	Breast invasive carcinoma	c539f561-93db-41f3-8d9f-71cd77a096a7	NA	10.381
breast	primary_cancer	TCGA-BH-A18F-01A-11R-A12D-07	Breast invasive carcinoma	eed6d177-6cec-493a-b811-1779bebae72a	NA	11.679
breast	primary_cancer	TCGA-C8-A278-01A-11R-A169-07	Breast invasive carcinoma	8cdae811-9f3f-4c8b-9fe5-e542d30d40f2	NA	1.313
breast	primary_cancer	TCGA-E2-A14Q-01A-11R-A12D-07	Breast invasive carcinoma	48d70a9a-b6ae-4ed6-80da-999a919f8da9	NA	8.543
breast	primary_cancer	TCGA-D8-A27P-01A-11R-A16F-07	Breast invasive carcinoma	189c7b41-4d4e-422e-85a2-1f575b5c8b5c	NA	31.041
breast	primary_cancer	TCGA-C8-A12K-01A-21R-A115-07	Breast invasive carcinoma	0ef00203-8a0a-4d04-aa1e-c1164958d8ec	NA	1.665
breast	primary_cancer	TCGA-A7-A3RF-01A-11R-A22K-07	Breast invasive carcinoma	de0a584e-117e-4cf6-8c4a-6fb040270eda	NA	7.201
breast	primary_cancer	TCGA-E2-A14R-01A-11R-A115-07	Breast invasive carcinoma	76a625e9-22b3-42b8-8813-27c133d0b248	NA	2.28
breast	primary_cancer	TCGA-EW-A1OZ-01A-11R-A144-07	Breast invasive carcinoma	73f6a579-eab4-4fbf-bb17-41f1a6614ace	NA	16.87
breast	primary_cancer	TCGA-C8-A27A-01A-11R-A169-07	Breast invasive carcinoma	520a6569-bf3a-495f-9460-7f65e4f59687	NA	13.802
breast	primary_cancer	TCGA-A2-A0YT-01A-11R-A109-07	Breast invasive carcinoma	451099b0-f348-4aec-bf9f-2982601f013c	NA	4.561
breast	primary_cancer	TCGA-AR-A1AR-01A-31R-A137-07	Breast invasive carcinoma	6d066a72-f59f-45a8-ab90-216000b36da4	NA	1.792
breast	primary_cancer	TCGA-A2-A0T7-01A-21R-A084-07	Breast invasive carcinoma	b5de3654-8983-45ab-a83a-d15284740d39	NA	10.842
breast	primary_cancer	TCGA-AO-A1KS-01A-11R-A13Q-07	Breast invasive carcinoma	9eab0553-20cc-41bb-bcdb-9ade0578da82	NA	22.525
breast	primary_cancer	TCGA-BH-A0BP-01A-11R-A115-07	Breast invasive carcinoma	acbae442-ba6c-4d28-b3bc-58bb4dd93ece	NA	3.737
breast	primary_cancer	TCGA-A8-A06Z-01A-11R-A00Z-07	Breast invasive carcinoma	42b99ee7-a1ae-4383-b343-adf468cb8b51	NA	16.038
breast	primary_cancer	TCGA-A7-A13E-01A-11R-A277-07	Breast invasive carcinoma	d3c9cc63-ca20-47de-b635-f843c7d3a824	NA	0.366
breast	primary_cancer	TCGA-AR-A0TR-01A-11R-A084-07	Breast invasive carcinoma	b31bf328-6ead-4ee4-b8c7-4407372dc683	NA	26.451
breast	primary_cancer	TCGA-D8-A1X9-01A-12R-A157-07	Breast invasive carcinoma	2b3d596a-68ca-4c60-bb16-8c0cbd8fb190	NA	10.721
breast	primary_cancer	TCGA-BH-A0W5-01A-11R-A109-07	Breast invasive carcinoma	91e55e6f-b884-4112-8d3f-a9f8974dd63b	NA	11.688
breast	primary_cancer	TCGA-OL-A5RW-01A-11R-A28M-07	Breast invasive carcinoma	c5a7673a-c45e-4789-a2c8-32889f39c102	NA	2.913
breast	primary_cancer	TCGA-AR-A24S-01A-11R-A169-07	Breast invasive carcinoma	3795f6d6-3a1d-4b41-8a4b-e832078e9d48	NA	10.035
breast	primary_cancer	TCGA-E2-A1IL-01A-11R-A14D-07	Breast invasive carcinoma	5610cbc9-1031-4b6a-9bba-a6b3ed7ced4d	NA	33.018
breast	primary_cancer	TCGA-E2-A1B1-01A-21R-A12P-07	Breast invasive carcinoma	2aa34033-a6f5-45a8-833b-b433352e58ba	NA	7.318
breast	primary_cancer	TCGA-AC-A8OR-01A-21R-A41B-07	Breast invasive carcinoma	15c73666-b316-4108-97e9-9d0e40540a2c	NA	9.381
breast	primary_cancer	TCGA-BH-A0BJ-01A-11R-A056-07	Breast invasive carcinoma	224cbe13-ebf8-41eb-ab1c-1d6792a66774	NA	7.855
breast	primary_cancer	TCGA-A7-A13G-01B-04R-A22O-07	Breast invasive carcinoma	95817802-63d7-4dd4-902f-3c61332e017c	NA	3.343
breast	primary_cancer	TCGA-D8-A1XZ-01A-11R-A14M-07	Breast invasive carcinoma	8b592b3b-47b5-45fa-98eb-01bf75096605	NA	13.009
breast	primary_cancer	TCGA-GM-A5PV-01A-11R-A28M-07	Breast invasive carcinoma	96c1cfef-0507-46f5-a007-d0f7369cced5	NA	24.118
breast	primary_cancer	TCGA-A8-A081-01A-11R-A00Z-07	Breast invasive carcinoma	c88b614b-811e-42f9-86e3-10909ced98e7	NA	12.481
breast	primary_cancer	TCGA-EW-A423-01A-11R-A24H-07	Breast invasive carcinoma	994c8287-b6e2-4743-80bb-fe8d0076ae44	NA	2.998
breast	primary_cancer	TCGA-EW-A1PF-01A-11R-A144-07	Breast invasive carcinoma	faa3383f-6f9f-43d8-b61d-4a1522a71444	NA	7.24
breast	primary_cancer	TCGA-AR-A2LH-01A-31R-A18M-07	Breast invasive carcinoma	6aa1a643-013f-43d4-a3e6-a4a946ac3678	NA	5.064
breast	primary_cancer	TCGA-A7-A0CJ-01A-21R-A00Z-07	Breast invasive carcinoma	62de6863-5d60-473c-8e13-e300b0640ed7	NA	20.07
breast	primary_cancer	TCGA-E9-A1RH-01A-21R-A169-07	Breast invasive carcinoma	422a4277-12f1-42ae-9f94-88d37517b9b0	NA	0.804
breast	primary_cancer	TCGA-AO-A0J6-01A-11R-A034-07	Breast invasive carcinoma	1fe98b05-6803-4803-83cd-a59e794b956e	NA	1.402
breast	primary_cancer	TCGA-BH-A1FR-01A-11R-A13Q-07	Breast invasive carcinoma	56d5aac4-62b4-43e4-b0e4-f40b19a5893f	NA	18.379
breast	primary_cancer	TCGA-D8-A1XQ-01A-11R-A14M-07	Breast invasive carcinoma	0c7fc003-950b-4138-8390-036c072b640e	NA	1.655
breast	primary_cancer	TCGA-C8-A1HN-01A-11R-A137-07	Breast invasive carcinoma	4795628e-50d8-41e0-b3c6-00fe4600dc5d	NA	6.322
breast	primary_cancer	TCGA-BH-A1EV-01A-11R-A137-07	Breast invasive carcinoma	4dac7a33-db46-4815-8c6c-fb326959c741	NA	13.342
breast	primary_cancer	TCGA-D8-A27L-01A-11R-A16F-07	Breast invasive carcinoma	de27ab29-90b0-4d13-8102-1c2bebc4c29a	NA	12.231
breast	primary_cancer	TCGA-BH-A0DS-01A-11R-A056-07	Breast invasive carcinoma	00ee8acd-0841-4c85-a99a-8966a6828dd7	NA	11.551
breast	primary_cancer	TCGA-B6-A1KF-01A-11R-A13Q-07	Breast invasive carcinoma	e7d1fcd1-eb2a-4b6d-b5bd-6a0a6e4bec66	NA	4.923
breast	primary_cancer	TCGA-AO-A0JC-01A-11R-A056-07	Breast invasive carcinoma	0f578102-ede7-46ad-ae1f-3c7351edb491	NA	2.793
breast	primary_cancer	TCGA-A7-A0CE-01A-11R-A00Z-07	Breast invasive carcinoma	e8ef8b75-7c0c-4a42-9a10-3789b6afa5d2	NA	4.478
breast	primary_cancer	TCGA-A8-A07F-01A-11R-A00Z-07	Breast invasive carcinoma	f6fd41e3-c597-4c5d-8f47-a315be0330f8	NA	20.178
breast	primary_cancer	TCGA-AO-A0JE-01A-11R-A056-07	Breast invasive carcinoma	d73174ef-182c-48b9-af79-dfb457d5b7be	NA	4.176
breast	primary_cancer	TCGA-AC-A3TM-01A-11R-A22K-07	Breast invasive carcinoma	902592e6-c7c5-46b8-b70b-5520df79a8a3	NA	11.124
breast	primary_cancer	TCGA-A8-A06N-01A-11R-A00Z-07	Breast invasive carcinoma	a14dc21a-6a46-4be8-9247-76cbc70dfe8b	NA	52.885
breast	primary_cancer	TCGA-D8-A1JG-01B-11R-A13Q-07	Breast invasive carcinoma	ee8b563d-11bb-4d84-ac53-e2acc8d0275d	NA	0.521
breast	primary_cancer	TCGA-AR-A1AY-01A-21R-A12P-07	Breast invasive carcinoma	49c4166c-701a-4f53-8968-99aec3347214	NA	1.954
breast	primary_cancer	TCGA-BH-A5J0-01A-11R-A27Q-07	Breast invasive carcinoma	a5f14d53-fe35-494e-b6b1-bc5c8484e4a9	NA	10.715
breast	primary_cancer	TCGA-AO-A12A-01A-21R-A115-07	Breast invasive carcinoma	3f4c6d17-a971-4ba0-83ad-3addc24f1298	NA	10.211
breast	primary_cancer	TCGA-AC-A2FE-01A-11R-A19W-07	Breast invasive carcinoma	22e03b77-aa0f-4348-98c1-9b0914e8af8b	NA	16.11
breast	primary_cancer	TCGA-D8-A27G-01A-11R-A16F-07	Breast invasive carcinoma	2ba9072c-39b9-438d-9a2c-0726dc3dc659	NA	10.327
breast	primary_cancer	TCGA-A8-A090-01A-11R-A00Z-07	Breast invasive carcinoma	752efa27-8d87-4007-9dc5-baef53b37a87	NA	6.863
breast	primary_cancer	TCGA-A1-A0SI-01A-11R-A144-07	Breast invasive carcinoma	44d93b9f-95d6-4382-9590-f6e7bdda65c5	NA	8.934
breast	primary_cancer	TCGA-BH-A0HW-01A-11R-A034-07	Breast invasive carcinoma	0172d30c-287c-4f3e-b70c-5760c6dccb7c	NA	18.907
breast	primary_cancer	TCGA-A2-A0CS-01A-11R-A115-07	Breast invasive carcinoma	560ab6aa-cbfe-42ac-9446-9d3df720bc81	NA	23.963
breast	primary_cancer	TCGA-AC-A3QQ-01B-06R-A22O-07	Breast invasive carcinoma	40263202-5826-4059-b7f4-56b1be17b65e	NA	3.831
breast	primary_cancer	TCGA-BH-A0EE-01A-11R-A034-07	Breast invasive carcinoma	24c0ef45-670d-4595-b623-87f81aeb92a7	NA	1.057
breast	primary_cancer	TCGA-A2-A3XY-01A-11R-A239-07	Breast invasive carcinoma	42c88ed3-de96-487d-8b03-e1d4269d0505	NA	2.058
breast	primary_cancer	TCGA-EW-A2FV-01A-11R-A17B-07	Breast invasive carcinoma	d60bfd82-87f0-4f13-8e90-6766beb84e9a	NA	3.257
breast	primary_cancer	TCGA-E2-A1IJ-01A-11R-A144-07	Breast invasive carcinoma	14404fa2-adc4-4ecd-b4ee-5f4a75b54ff2	NA	10.322
breast	primary_cancer	TCGA-A2-A0CT-01A-31R-A056-07	Breast invasive carcinoma	f33b0a48-706b-4fd8-b8b3-0a9f625bd0c0	NA	25.35
breast	primary_cancer	TCGA-BH-A0B5-01A-11R-A12P-07	Breast invasive carcinoma	4b964043-f6dd-4f19-ab4c-439ee68ce2b0	NA	19.164
breast	primary_cancer	TCGA-A2-A1G4-01A-11R-A13Q-07	Breast invasive carcinoma	2ce88ee9-0fc6-4d1d-82a7-be79eaee21d2	NA	7.079
breast	primary_cancer	TCGA-AN-A0XS-01A-22R-A109-07	Breast invasive carcinoma	b77f4222-9000-4485-8728-8864780ebcb8	NA	13.571
breast	primary_cancer	TCGA-B6-A402-01A-11R-A239-07	Breast invasive carcinoma	976a1b88-ed7a-493a-8ac9-3d504edfbc76	NA	1.162
breast	primary_cancer	TCGA-E9-A1N6-01A-11R-A144-07	Breast invasive carcinoma	05b5084f-5e4f-43a3-9819-456a4f24ad82	NA	3.763
breast	primary_cancer	TCGA-BH-A0DD-01A-31R-A12P-07	Breast invasive carcinoma	e15ff180-38d3-4614-88ee-3645afaab54b	NA	20.524
breast	primary_cancer	TCGA-BH-A18M-01A-11R-A12D-07	Breast invasive carcinoma	4dfbdec6-1911-412c-9873-f6782ab8ff66	NA	13.314
breast	primary_cancer	TCGA-A8-A0A2-01A-11R-A034-07	Breast invasive carcinoma	6330ab59-db9d-4b22-a96b-1024c9b4908d	NA	43.594
breast	primary_cancer	TCGA-EW-A2FR-01A-11R-A21T-07	Breast invasive carcinoma	2bd1673c-b5c0-425b-9e62-c501bf29616b	NA	3.592
breast	primary_cancer	TCGA-XX-A89A-01A-11R-A36F-07	Breast invasive carcinoma	501a70d8-3932-49c0-aa13-774756fb89e3	NA	6.258
breast	primary_cancer	TCGA-C8-A8HR-01A-11R-A36F-07	Breast invasive carcinoma	d817dcee-1322-4949-a6e9-138447e6fc56	NA	5.371
breast	primary_cancer	TCGA-A7-A13D-01A-13R-A277-07	Breast invasive carcinoma	24664b94-f5b5-4a99-a09b-66e23edf5916	NA	0.373
breast	primary_cancer	TCGA-A8-A06X-01A-21R-A00Z-07	Breast invasive carcinoma	3ea9e7f1-39af-4089-b1c0-3c62db4e3102	NA	2.688
breast	primary_cancer	TCGA-E9-A54Y-01A-11R-A466-07	Breast invasive carcinoma	c11ffcd0-8e82-4815-b30b-2d08945ce0bc	NA	3.057
breast	primary_cancer	TCGA-AO-A12G-01A-11R-A10J-07	Breast invasive carcinoma	348a0fd6-eb6b-4550-a26a-3896c4963b3a	NA	9.759
breast	primary_cancer	TCGA-BH-A0HU-01A-11R-A034-07	Breast invasive carcinoma	c3c6bd09-e8ea-45f3-bdd6-e592bfc2b94f	NA	8.84
breast	primary_cancer	TCGA-D8-A1XF-01A-11R-A14D-07	Breast invasive carcinoma	80562b20-3e3e-4f77-8ca2-958f8636d720	NA	6.941
breast	primary_cancer	TCGA-5L-AAT1-01A-12R-A41B-07	Breast invasive carcinoma	34dfa8c6-6445-4ef8-bc3b-b2ba600b5808	NA	9.402
breast	primary_cancer	TCGA-A2-A0CU-01A-12R-A034-07	Breast invasive carcinoma	84ea9827-9ad4-4e2f-be02-c88a9d4c4051	NA	7.989
breast	primary_cancer	TCGA-BH-A0HY-01A-11R-A056-07	Breast invasive carcinoma	e074391d-348f-4f95-aad0-7f51c56b9696	NA	4.288
breast	primary_cancer	TCGA-AR-A24R-01A-11R-A169-07	Breast invasive carcinoma	401721b2-a1d1-46d3-b73c-ec06df30d61e	NA	31.396
breast	primary_cancer	TCGA-A8-A08S-01A-11R-A034-07	Breast invasive carcinoma	667c209e-9b4a-474d-8f69-102cfaffddf2	NA	32.555
breast	primary_cancer	TCGA-D8-A1JL-01A-11R-A13Q-07	Breast invasive carcinoma	b4673313-fa18-43e8-a01b-5cdb3cf5425e	NA	5.941
breast	primary_cancer	TCGA-AR-A24N-01A-11R-A169-07	Breast invasive carcinoma	48bf0fa5-66c2-495d-93ef-943bc7ff31ac	NA	3.395
breast	primary_cancer	TCGA-E2-A14U-01A-11R-A22K-07	Breast invasive carcinoma	20d25e27-b509-45eb-a734-9b8d6a40c632	NA	20.58
breast	primary_cancer	TCGA-A2-A04Y-01A-21R-A034-07	Breast invasive carcinoma	7002615e-435b-4631-bb5b-e4b7532a143a	NA	1.361
[truncated: 7,941 more rows]

## Sheet: p-values_normal_vs_cancer
Tissue	Group A	Group B	p-value
brain	Cancer	Normal	1.66e-99
colorectal	Cancer	Normal	1.72e-90
testis	Cancer	Normal	1.29e-40
esophagus	Cancer	Normal	3.88e-28
adrenal	Cancer	Normal	5.58e-23
blood	Cancer	Normal	1.06e-15
breast	Cancer	Normal	1.82e-15
kidney	Cancer	Normal	7.98e-13
liver	Cancer	Normal	1.67e-12
skin	Cancer	Normal	2.97e-12
pancreas	Cancer	Normal	1.24e-11
stomach	Cancer	Normal	3.43e-10
cervix	Cancer	Normal	3.3e-09
uterus	Cancer	Normal	1.04e-05
bladder_urothelial	Cancer	Normal	1.3e-05
biliary	Cancer	Normal	0.00174
lung	Cancer	Normal	0.0168
thyroid	Cancer	Normal	0.0174
ovary	Cancer	Normal	0.0242
head_neck	Cancer	Normal	0.262
prostate	Cancer	Normal	0.437
